# Supplementary material for: Evaluation of Two Different Solvents for Azolla pinnata Extracts on Chemical Compositions and Larvicidal Activity against Aedes albopictus (Diptera: Culicidae)
Source: Hindawi journal article supplement (doi:10.1155/2018/7453816), 2018-11-13

## Sample Information

## LIBRARY SEARCH

ID : A1  
Sample Name : A1  
Date : 17/4/2018

## Library

&lt;&lt; Target &gt;&gt;

Line#:1 R.Time:3.780(Scan#:57) MassPeaks:234

RawMode:Averaged 3.775-3.785(56-58) BasePeak:55.00(4055)

BG Mode:Calc. from Peak Group 1 - Event 1

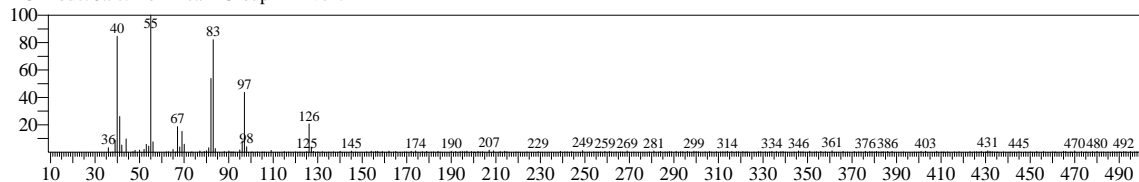

Hit#:1 Entry:6690 Library:NIST08.LIB

SI:84 Formula:C9H18 CAS:1678-92-8 MolWeight:126 RetIndex:979

CompName:Cyclohexane, propyl- \$\$ Propylcyclohexane \$\$ n-Propylcyclohexane \$\$ Cyclohexane, n-propyl- \$\$

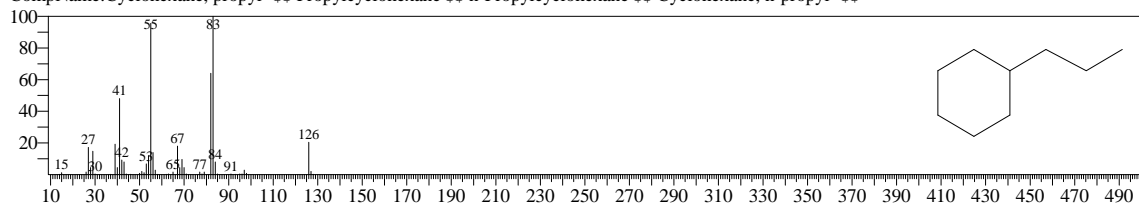

Hit#:2 Entry:7092 Library:NIST08s.LIB

SI:83 Formula:C10H20 CAS:1678-98-4 MolWeight:140 RetIndex:1015

CompName:Cyclohexane, (2-methylpropyl)- \$\$ Cyclohexane, isobutyl- \$\$ Isobutylcyclohexane \$\$ i-Butylcyclohexane \$\$

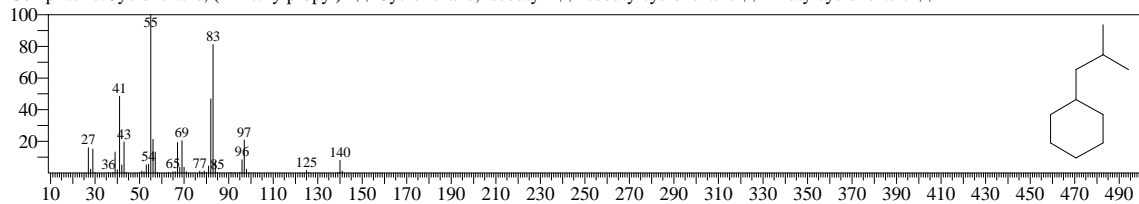

Hit#:3 Entry:6691 Library:NIST08.LIB

SI:82 Formula:C9H18 CAS:696-29-7 MolWeight:126 RetIndex:915

CompName:Cyclohexane, (1-methylethyl)- \$\$ Cyclohexane, isopropyl- \$\$ Isopropylcyclohexane \$\$ Hexahydromene \$\$ Normanthane \$\$

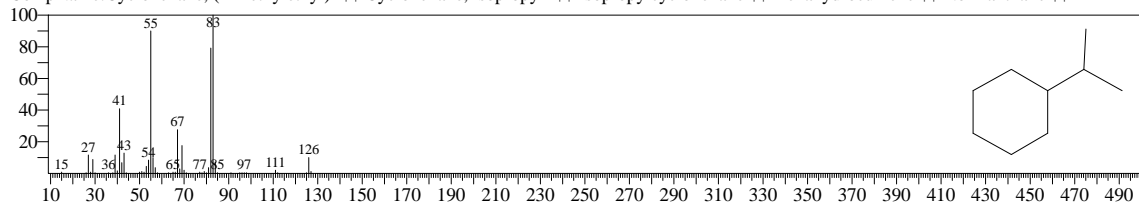

Hit#:4 Entry:17535 Library:NIST08.LIB

SI:82 Formula:C11H22 CAS:29949-27-7 MolWeight:154 RetIndex:1178

CompName:n-Amylcyclohexane \$\$ Pentylcyclohexane # \$\$

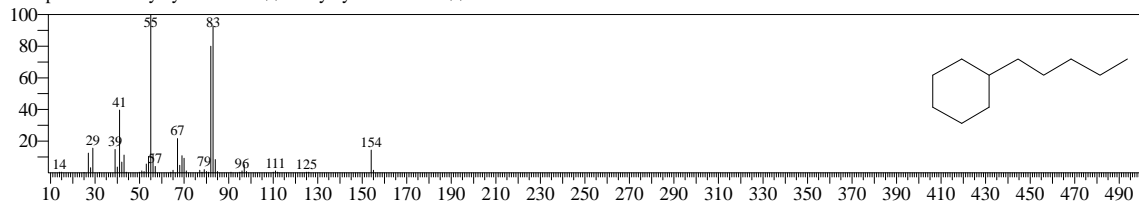

Hit#:5 Entry:9684 Library:NIST08s.LIB

SI:81 Formula:C11H22 CAS:4292-92-6 MolWeight:154 RetIndex:1178

CompName:Cyclohexane, pentyl- \$\$ Cyclohexane, n-pentyl- \$\$ Pentane, 1-cyclohexyl- \$\$ Pentylcyclohexane \$\$ 1-Cyclohexylpentane \$\$ Amylcyclo

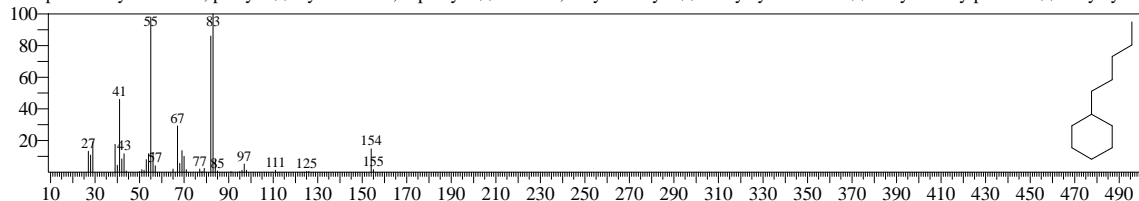

<< Target >>

Line#:2 R.Time:4.235(Scan#:148) MassPeaks:295

RawMode:Averaged 4.230-4.240(147-149) BasePeak:61.00(82021)

BG Mode:Calc. from Peak Group 1 - Event 1

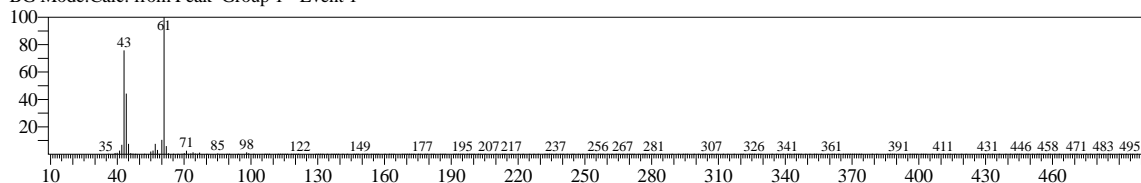

Hit#:1 Entry:1215 Library:NIST08s.LIB

SI:96 Formula:C3H8O3 CAS:56-81-5 MolWeight:92 RetIndex:967

CompName:Glycerin \$\$ 1,2,3-Propanetriol \$\$ Glycerol \$\$ Glycerine \$\$ Glyceritol \$\$ Glycyl alcohol \$\$ Glyrol \$\$ Glysanin \$\$ Osmoglyn \$\$ Propan

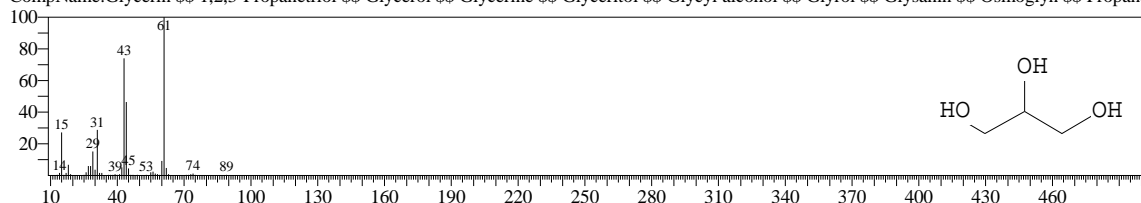

Hit#:2 Entry:22749 Library:NIST08.LIB

SI:86 Formula:C6H14O5 CAS:627-82-7 MolWeight:166 RetIndex:1504

CompName:Diglycerol \$\$ 1,2-Propanediol, 3,3'-oxybis- \$\$ .alpha.,.alpha.'-Diglycerol \$\$ Diglycerine \$\$ 1,2-Propanediol, 3,3'-oxydi- \$\$ 3,3'-Oxydi-1,

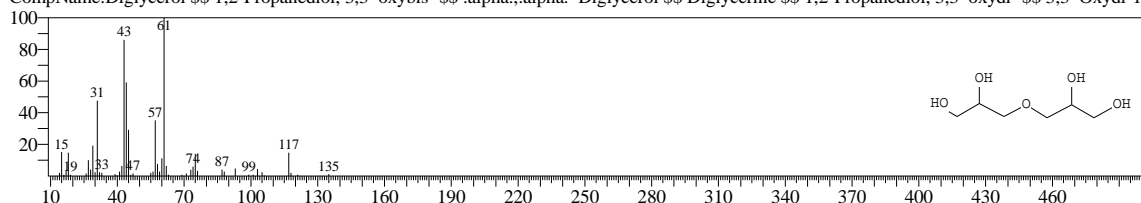

Hit#:3 Entry:1111 Library:NIST08.LIB

SI:86 Formula:C3H6O3 CAS:56-82-6 MolWeight:90 RetIndex:913

CompName:dl-Glyceraldehyde \$\$ Propanal, 2,3-dihydroxy-, (+/-)- \$\$ Propanal, 2,3-dihydroxy-, (+/-)- \$\$ Glyceraldehyde, dl- \$\$ Glyceraldehyde, (-

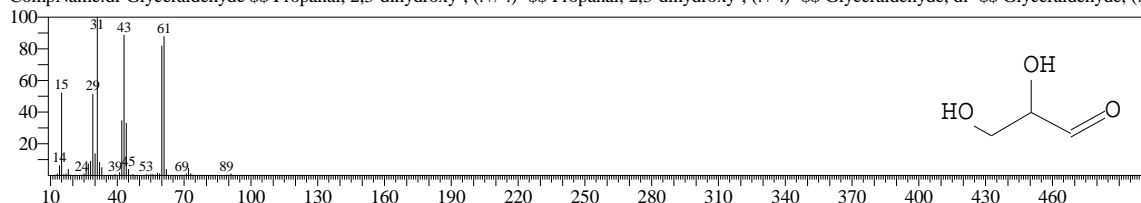

Hit#:4 Entry:4132 Library:NIST08s.LIB

SI:86 Formula:C4H10O4 CAS:2319-57-5 MolWeight:122 RetIndex:1229

CompName:1,2,3,4-Butanetetrol, [S-(R\*,R\*)]- \$\$ Erythritol \$\$ l-Threitol \$\$ 1,2,3,4-Butanetetrol # \$\$

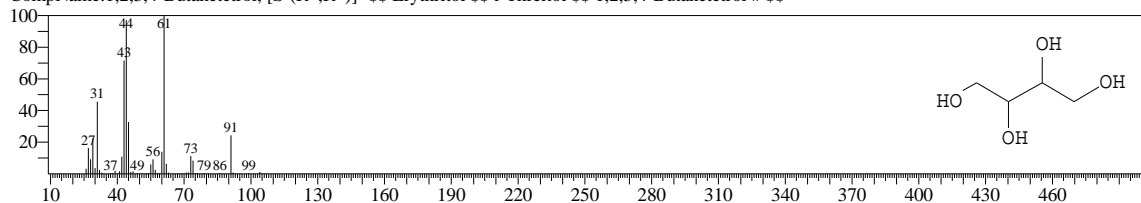

Hit#:5 Entry:4502 Library:NIST08.LIB

SI:86 Formula:C5H12N2O CAS:57536-14-8 MolWeight:116 RetIndex:796

CompName:O-Butylisourea \$\$ Butyl imidocarbamate # \$\$

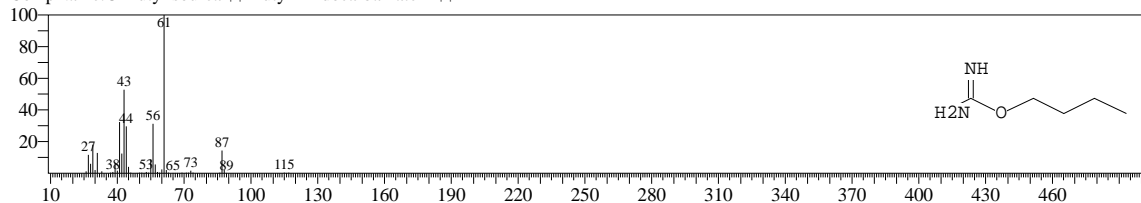

<< Target >>

Line#3 R.Time:4.580(Scan#:217) MassPeaks:255

RawMode:Averaged 4.575-4.585(216-218) BasePeak:69.05(1802)

BG Mode:Calc. from Peak Group 1 - Event 1

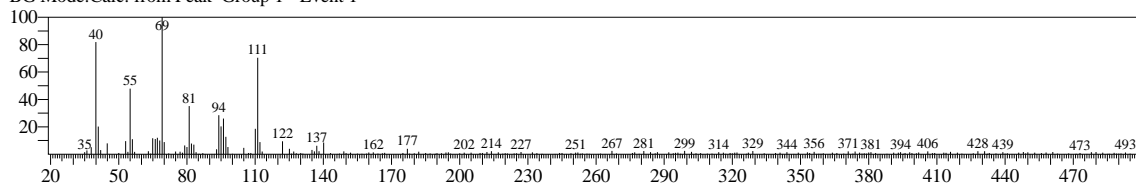

Hit#1 Entry:19130 Library:NIST08s.LIB

SI:77 Formula:C<sub>16</sub>H<sub>30</sub> CAS:6708-17-4 MolWeight:222 RetIndex:1821

CompName:1,1'-Bicyclooctyl

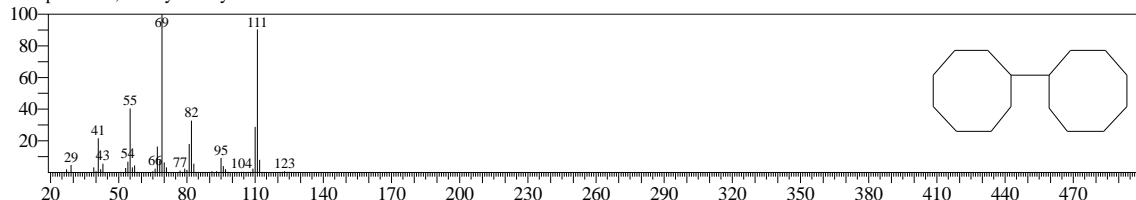

Hit#2 Entry:42787 Library:NIST08.LIB

SI:75 Formula:C<sub>11</sub>H<sub>20</sub>O<sub>3</sub> CAS:0-00-0 MolWeight:200 RetIndex:1383

CompName:Methoxyacetic acid, 2-ethylcyclohexyl ester

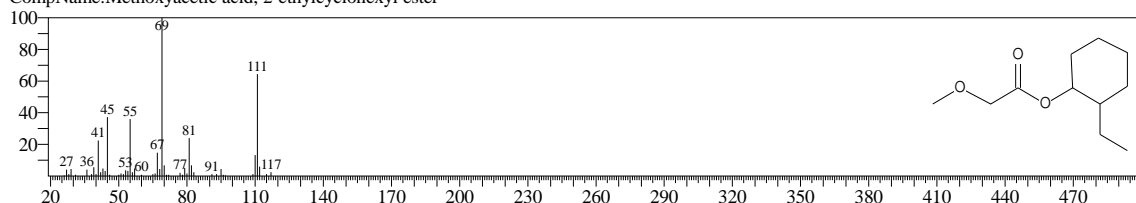

Hit#3 Entry:11402 Library:NIST08.LIB

SI:74 Formula:C<sub>10</sub>H<sub>20</sub> CAS:824-43-1 MolWeight:140 RetIndex:1040

CompName:Cyclohexane, 1,2-diethyl-, cis- 1,2-Diethylcyclohexane # \$\$

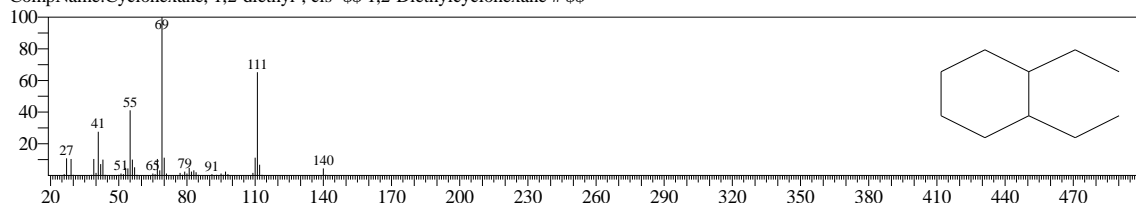

Hit#4 Entry:23386 Library:NIST08.LIB

SI:74 Formula:C<sub>12</sub>H<sub>22</sub> CAS:74421-09-3 MolWeight:166 RetIndex:1134

CompName:Cyclopentane, 1,1,3-trimethyl-3-(2-methyl-2-propenyl)- 1,1,3-Trimethyl-3-(2-methyl-2-propenyl)cyclopentane # \$\$

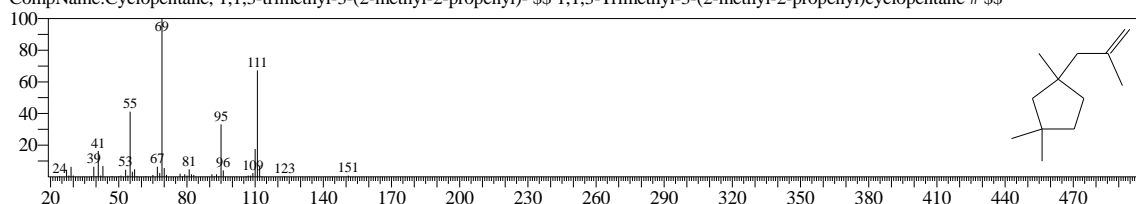

Hit#5 Entry:7431 Library:NIST08s.LIB

SI:73 Formula:C<sub>9</sub>H<sub>18</sub>O CAS:3637-63-6 MolWeight:142 RetIndex:1263

CompName:Cyclooctanemethanol 1-Cyclooctylmethanol

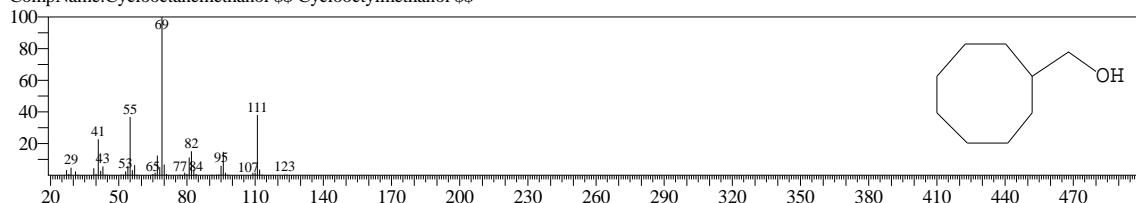

<< Target >>

Line#:4 R.Time:4.965(Scan#:294) MassPeaks:258

RawMode:Averaged 4.960-4.970(293-295) BasePeak:83.00(13964)

BG Mode:Calc. from Peak Group 1 - Event 1

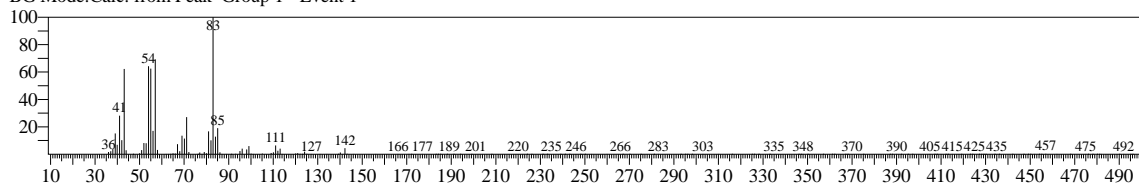

Hit#:1 Entry:24564 Library:NIST08.LIB

SI:82 Formula:C<sub>12</sub>H<sub>24</sub> CAS:55170-80-4 MolWeight:168 RetIndex:1117

CompName:1-Decene, 2,4-dimethyl- \$ 2,4-Dimethyl-1-decene # \$

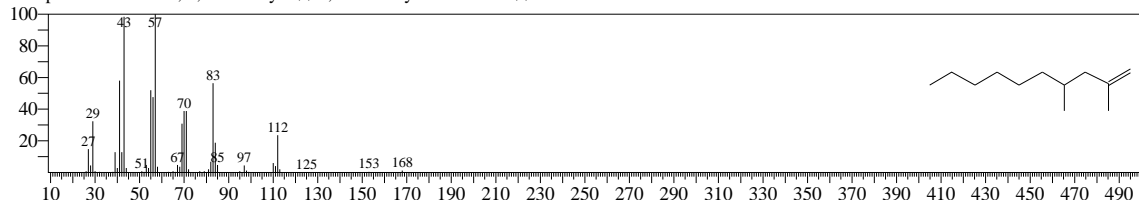

Hit#:2 Entry:26939 Library:NIST08s.LIB

SI:82 Formula:C<sub>26</sub>H<sub>54</sub>O CAS:506-52-5 MolWeight:382 RetIndex:2848

CompName:1-Hexacosanol \$ n-Hexacosanol \$ Ceryl alcohol \$ Cerylic alcohol \$ Hexacosyl alcohol \$

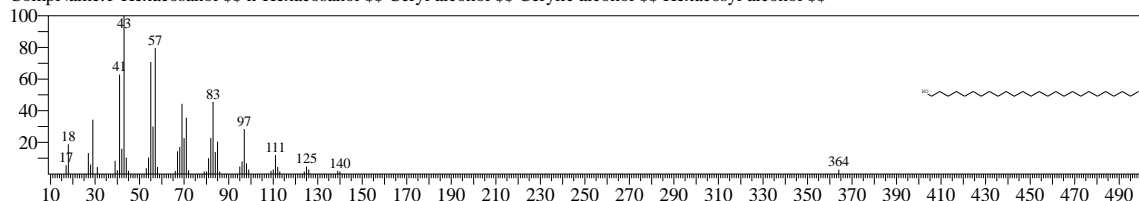

Hit#:3 Entry:32440 Library:NIST08.LIB

SI:82 Formula:C<sub>13</sub>H<sub>26</sub> CAS:25524-42-9 MolWeight:182 RetIndex:1321

CompName:5-Tridecene, (Z)- \$ (5Z)-5-Tridecene # \$

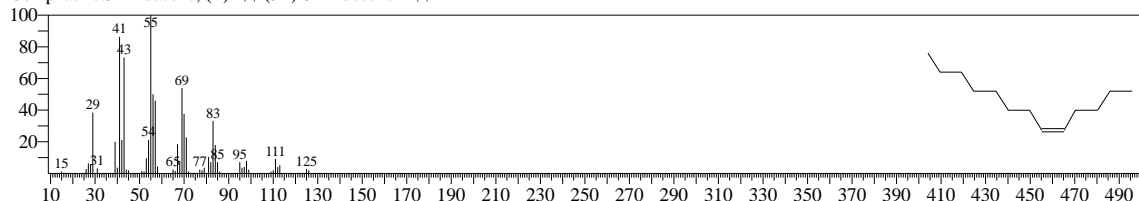

Hit#:4 Entry:25656 Library:NIST08s.LIB

SI:81 Formula:C<sub>15</sub>H<sub>25</sub>F<sub>5</sub>O<sub>2</sub> CAS:6222-04-4 MolWeight:332 RetIndex:1375

CompName:Pentafluoropropionic acid, dodecyl ester \$ Dodecyl 2,2,3,3,3-pentafluoropropanoate # \$ Dodecyl pentafluoropropionate \$ Dodecyl 2,

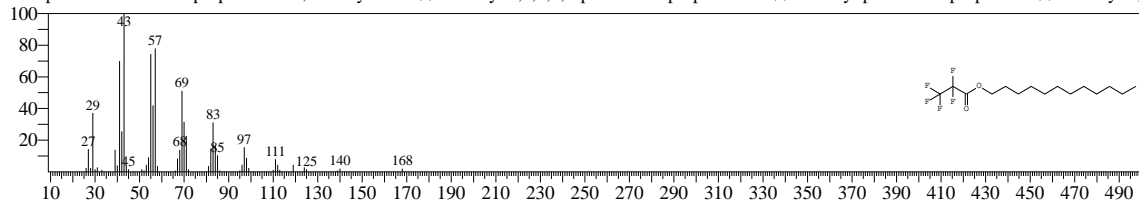

Hit#:5 Entry:24168 Library:NIST08s.LIB

SI:81 Formula:C<sub>20</sub>H<sub>40</sub>O CAS:930-02-9 MolWeight:296 RetIndex:2075

CompName:Octadecane, 1-(ethenloxy)- \$ Ether, octadecyl vinyl \$ Octadecyl vinyl ether \$ Stearyl vinyl ether \$ Vinyl stearyl ether \$ Vinyl octa

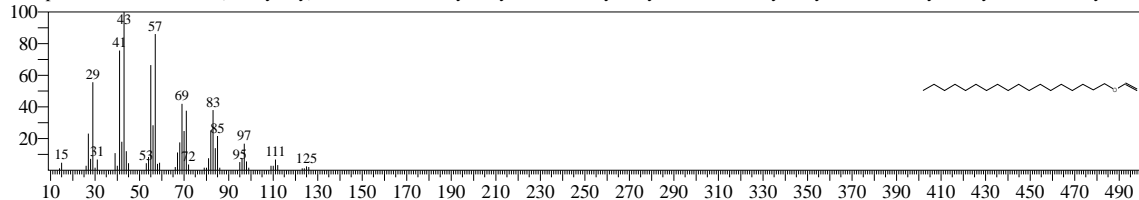

<< Target >>

Line#5 R.Time:5.105(Scan#:322) MassPeaks:240

RawMode:Averaged 5.100-5.110(321-323) BasePeak:55.05(2107)

BG Mode:Calc. from Peak Group 1 - Event 1

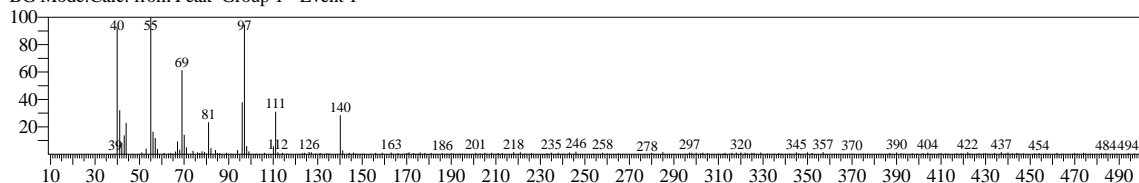

Hit#1 Entry:11352 Library:NIST08.LIB

SI:82 Formula:C10H20 CAS:489-20-3 MolWeight:140 RetIndex:918

CompName:Cyclopentane, 1,2-dimethyl-3-(1-methylethyl)- \$\$ 1-Isopropyl-2,3-dimethylcyclopentane # \$\$

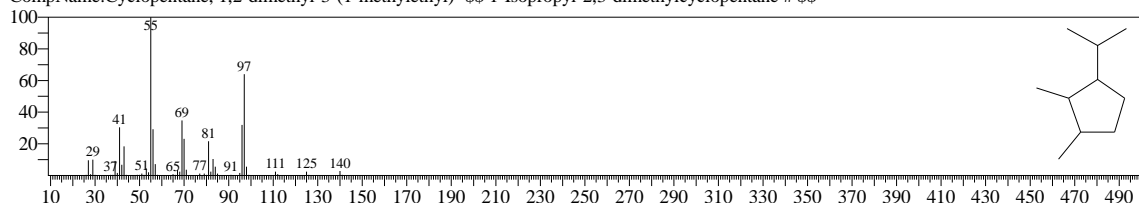

Hit#2 Entry:11356 Library:NIST08.LIB

SI:80 Formula:C10H20 CAS:16580-26-0 MolWeight:140 RetIndex:989

CompName:Cyclohexane, 1-isopropyl-1-methyl- \$\$ 1-Isopropyl-1-methylcyclohexane # \$\$

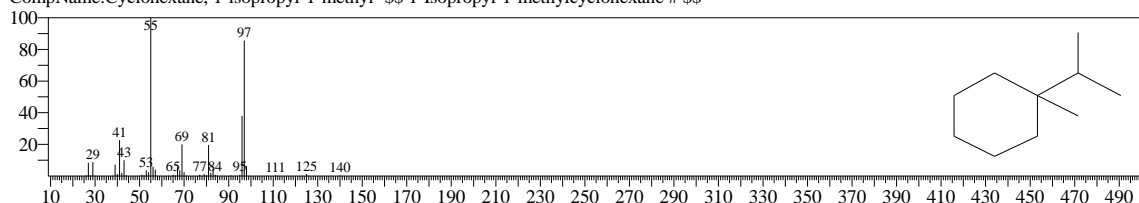

Hit#3 Entry:24614 Library:NIST08.LIB

SI:80 Formula:C12H24 CAS:54411-01-7 MolWeight:168 RetIndex:1239

CompName:Cyclohexane, 1-methyl-2-pentyl- \$\$ 1-Methyl-2-pentylcyclohexane # \$\$

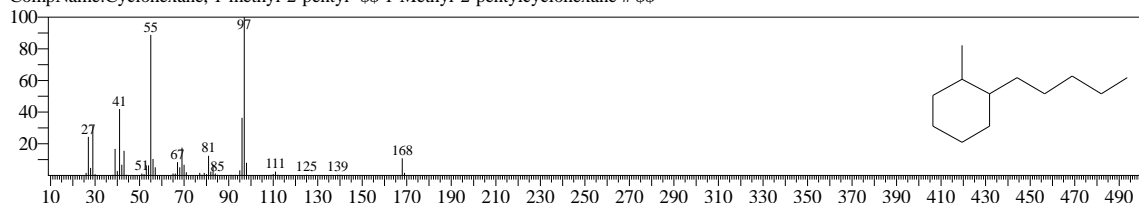

Hit#4 Entry:7098 Library:NIST08s.LIB

SI:80 Formula:C10H20 CAS:1678-82-6 MolWeight:140 RetIndex:976

CompName:Cyclohexane, 1-methyl-4-(1-methylethyl)-, trans- \$\$ p-Menthane, trans- \$\$ trans-p-Menthane \$\$ 1-Methyl-trans-4-isopropylcyclohexane

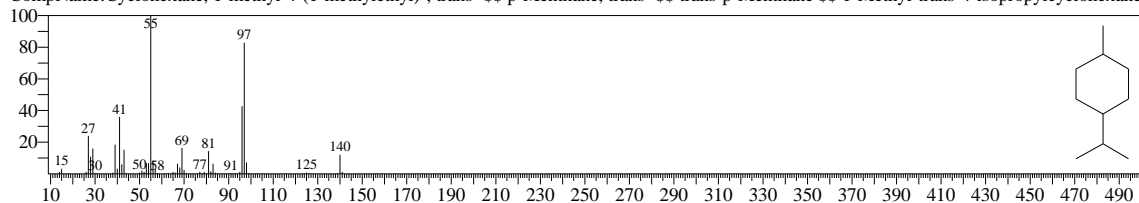

Hit#5 Entry:11357 Library:NIST08.LIB

SI:79 Formula:C10H20 CAS:6069-98-3 MolWeight:140 RetIndex:976

CompName:Cyclohexane, 1-methyl-4-(1-methylethyl)-, cis- \$\$ p-Menthane, cis- \$\$ cis-p-Menthane \$\$ 1-Isopropyl-cis-4-methylcyclohexane \$\$ 1-Me

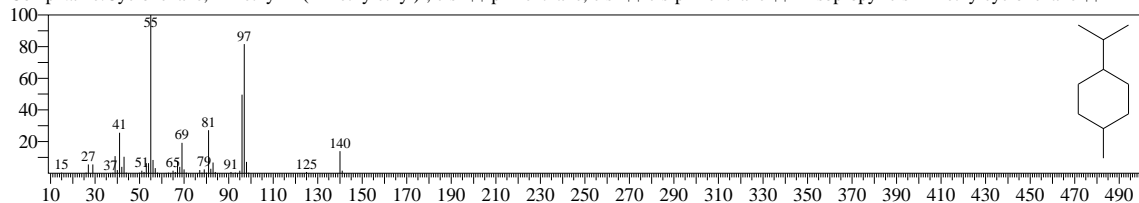

<< Target >>

Line#6 R.Time:8.325(Scan#966) MassPeaks:265

RawMode:Averaged 8.320-8.330(965-967) BasePeak:83.00(3686)

BG Mode:Calc. from Peak Group 1 - Event 1

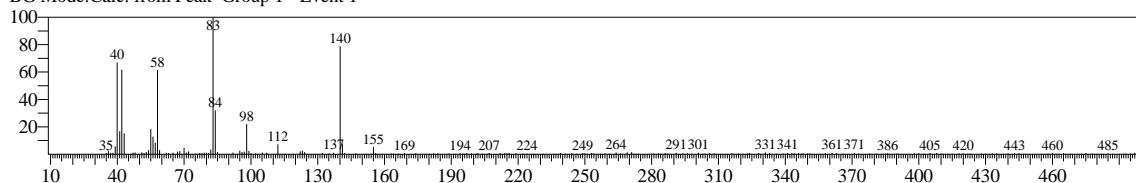

Hit#1 Entry:17810 Library:NIST08.LIB

SI:91 Formula:C9H17NO CAS:10581-38-1 MolWeight:155 RetIndex:1306

CompName:2,2,6,6-Tetramethyl-4-piperidone \$\$ 2,2,6,6-Tetramethyl-4-piperidinone # \$\$

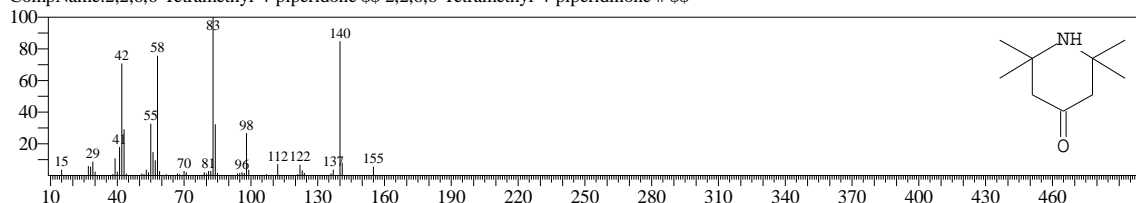

Hit#2 Entry:17836 Library:NIST08.LIB

SI:91 Formula:C9H17NO CAS:826-36-8 MolWeight:155 RetIndex:1306

CompName:4-Piperidinone, 2,2,6,6-tetramethyl- \$\$ 2,2,6,6-Tetramethyl-4-piperidone \$\$ Triacetonamin \$\$ Triacetonamine \$\$ Triacetone amine \$\$ Vi

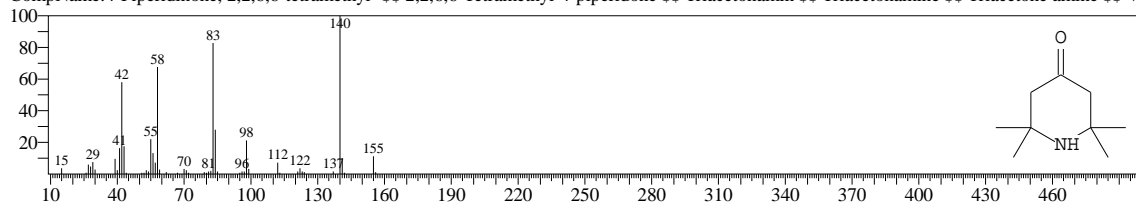

Hit#3 Entry:6929 Library:NIST08s.LIB

SI:75 Formula:C6H8N2O2 CAS:874-14-6 MolWeight:140 RetIndex:1307

CompName:2,4(1H,3H)-Pyrimidinedione, 1,3-dimethyl- \$\$ Uracil, 1,3-dimethyl- \$\$ N,N'-Dimethyluracil \$\$ N1,N3-Dimethyluracil \$\$ 1,3-Dimethylu

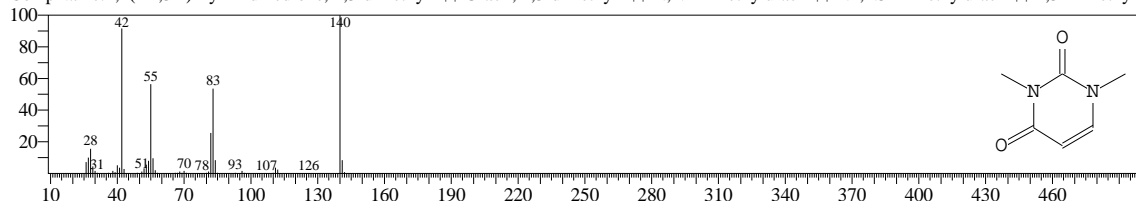

Hit#4 Entry:17809 Library:NIST08.LIB

SI:75 Formula:C9H17NO CAS:133217-97-7 MolWeight:155 RetIndex:1102

CompName:2-Butenamide, N,N-diethyl-2-methyl-, (E)- \$\$ (2E)-N,N-Diethyl-2-methyl-2-butenamide # \$\$

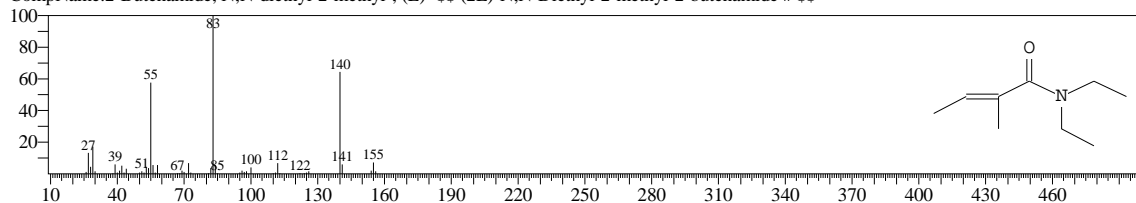

Hit#5 Entry:11100 Library:NIST08.LIB

SI:74 Formula:C8H12O2 CAS:126-81-8 MolWeight:140 RetIndex:1197

CompName:1,3-Cyclohexanedione, 5,5-dimethyl- \$\$ Cyclomethone \$\$ Dimedon \$\$ Dimedone \$\$ Lu 274 \$\$ Medon \$\$ Methon \$\$ Methone \$\$ 1,1-I

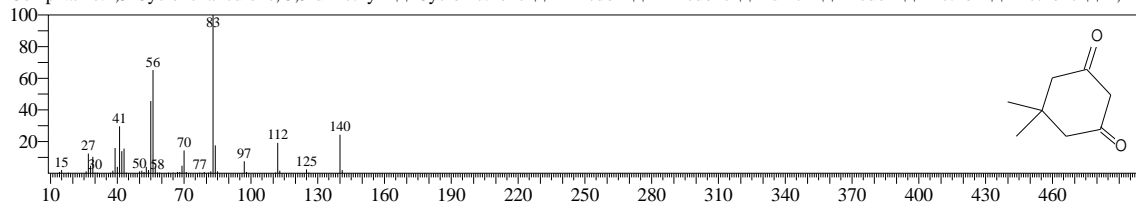

<< Target >>

Line#:7 R.Time:9.230(Scan#:1147) MassPeaks:279

RawMode:Averaged 9.225-9.235(1146-1148) BasePeak:83.05(4686)

BG Mode:Calc. from Peak Group 1 - Event 1

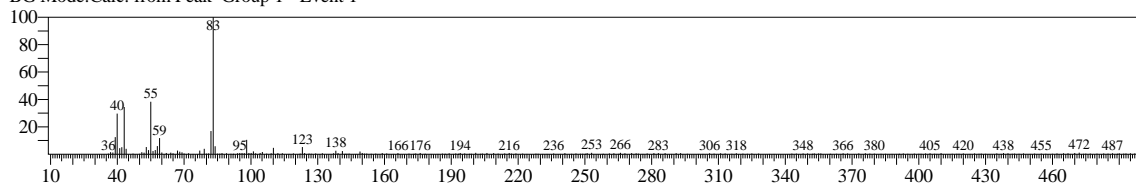

Hit#:1 Entry:1559 Library:NIST08s.LIB

SI:81 Formula:C<sub>6</sub>H<sub>10</sub>O CAS:763-93-9 MolWeight:98 RetIndex:762

CompName:3-Hexen-2-one \$\$ 1-Butenyl methyl ketone \$\$ Methyl 1-butenyl ketone \$\$ (3E)-3-Hexen-2-one # \$\$

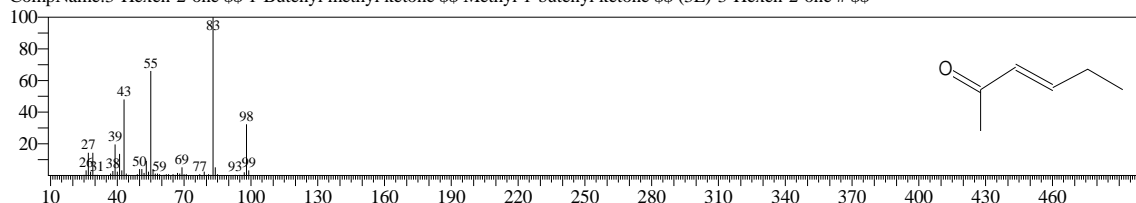

Hit#:2 Entry:33795 Library:NIST08.LIB

SI:81 Formula:C<sub>9</sub>H<sub>15</sub>NO<sub>3</sub> CAS:73583-56-9 MolWeight:185 RetIndex:1334

CompName:2,6-Dimethyl-6-nitro-2-hepten-4-one

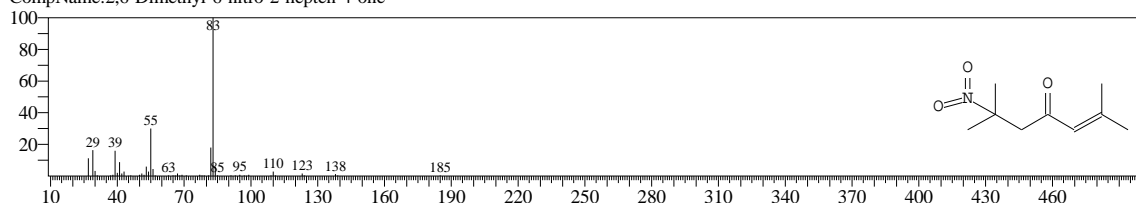

Hit#:3 Entry:1698 Library:NIST08.LIB

SI:81 Formula:C<sub>6</sub>H<sub>10</sub>O CAS:141-79-7 MolWeight:98 RetIndex:739

CompName:3-Penten-2-one, 4-methyl- \$\$ Acetone, isopropylidene- \$\$ Isobutenyl methyl ketone \$\$ Isopropylideneacetone \$\$ Mesityl oxide \$\$ Methyl vinyl ketone

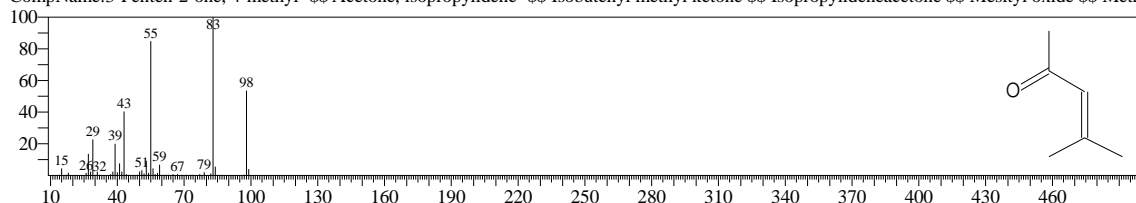

Hit#:4 Entry:1629 Library:NIST08s.LIB

SI:79 Formula:C<sub>7</sub>H<sub>14</sub> CAS:625-65-0 MolWeight:98 RetIndex:638

CompName:2-Pentene, 2,4-dimethyl- \$\$ 2,4-Dimethyl-2-pentene \$\$ (CH<sub>3</sub>)<sub>2</sub>CHCH=C(CH<sub>3</sub>)<sub>2</sub> \$\$

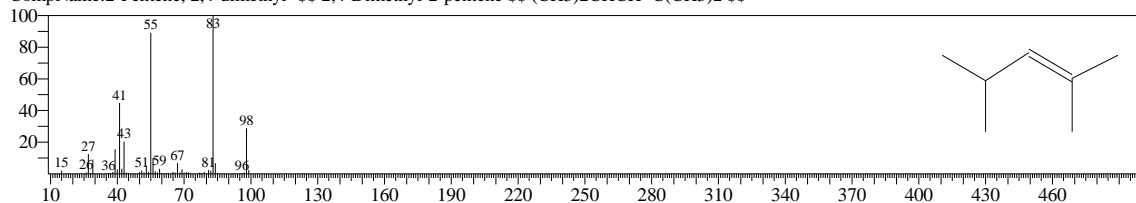

Hit#:5 Entry:17570 Library:NIST08.LIB

SI:79 Formula:C<sub>11</sub>H<sub>22</sub> CAS:74421-06-0 MolWeight:154 RetIndex:972

CompName:2-Heptene, 5-ethyl-2,4-dimethyl- \$\$ 5-Ethyl-2,4-dimethyl-2-heptene # \$\$

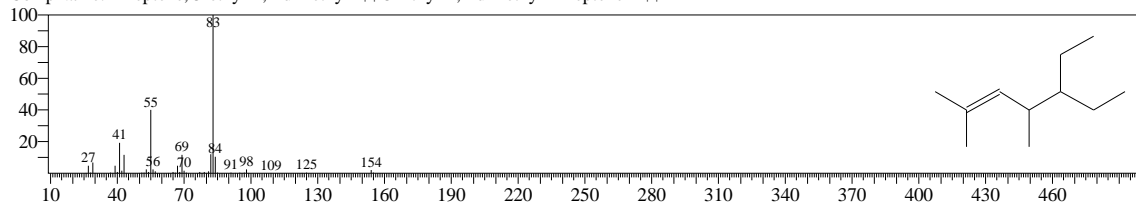

<< Target >>

Line#:8 R.Time:10.710(Scan#:1443) MassPeaks:221

RawMode:Averaged 10.705-10.715(1442-1444) BasePeak:97.05(2783)

BG Mode:Calc. from Peak Group 1 - Event 1

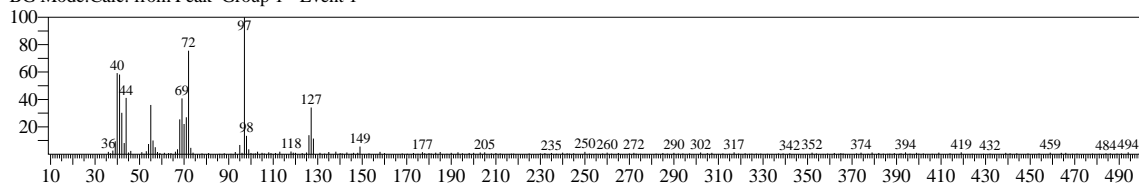

Hit#:1 Entry:51179 Library:NIST08.LIB

SI:72 Formula:C<sub>10</sub>H<sub>19</sub>N<sub>3</sub>O<sub>2</sub> CAS:349497-76-3 MolWeight:213 RetIndex:1944

CompName:Butanamide, 3-(2-methylpropionylhydrazono)-N-ethyl- (3E)-N-Ethyl-3-(isobutyrylhydrazono)butanamide #

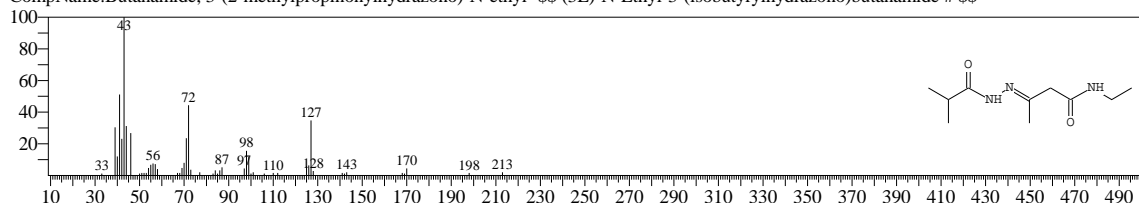

Hit#:2 Entry:11162 Library:NIST08.LIB

SI:72 Formula:C<sub>8</sub>H<sub>16</sub>N<sub>2</sub> CAS:0-00-0 MolWeight:140 RetIndex:1248

CompName:N,N'-Dibutylidene-hydrazine

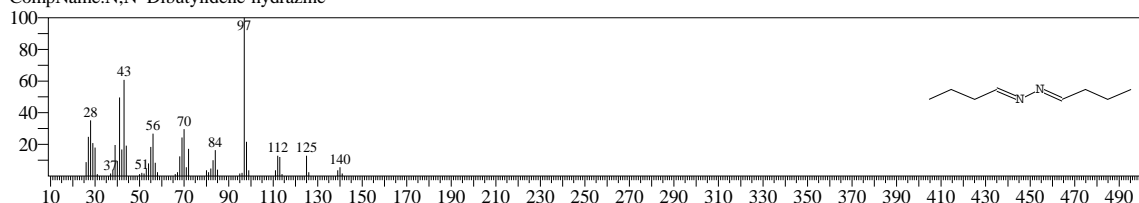

Hit#:3 Entry:6655 Library:NIST08.LIB

SI:72 Formula:C<sub>9</sub>H<sub>18</sub> CAS:932-40-1 MolWeight:126 RetIndex:921

CompName:trans-1,2-Diethyl cyclopentane Cyclopentane, 1,2-diethyl-, trans- (3E)-3,5-Dimethyl-3-heptene #

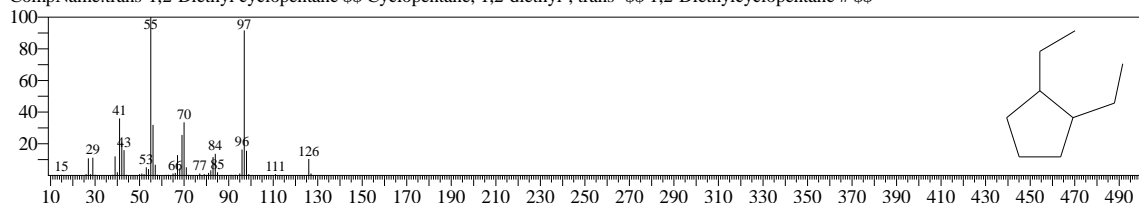

Hit#:4 Entry:4780 Library:NIST08.LIB

SI:72 Formula:C<sub>9</sub>H<sub>18</sub> CAS:59643-68-4 MolWeight:126 RetIndex:837

CompName:3,5-Dimethyl-3-heptene (3E)-3,5-Dimethyl-3-heptene #

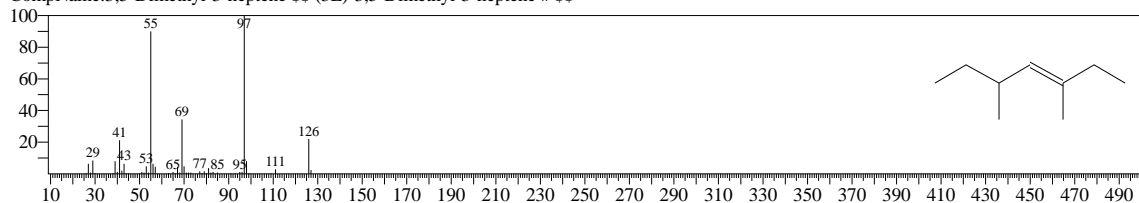

Hit#:5 Entry:6853 Library:NIST08.LIB

SI:72 Formula:C<sub>7</sub>H<sub>13</sub>NO CAS:26389-59-3 MolWeight:127 RetIndex:1119

CompName:Cyclopropanecarboxamide, N-n-propyl n-Propylcyclopropanecarboxamide #

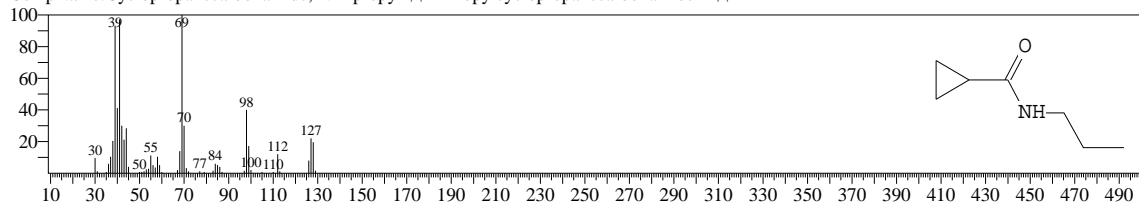

<< Target >>

Line#:9 R.Time:10.830(Scan#:1467) MassPeaks:265

RawMode:Averaged 10.825-10.835(1466-1468) BasePeak:43.00(5112)

BG Mode:Calc. from Peak Group 1 - Event 1

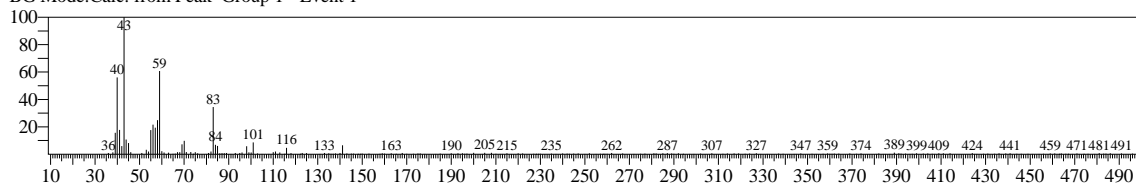

Hit#:1 Entry:25303 Library:NIST08.LIB

SI:83 Formula:C<sub>9</sub>H<sub>14</sub>O<sub>3</sub> CAS:6228-86-0 MolWeight:170 RetIndex:1104

CompName:4-Heptanone, 2,3:5,6-diepoxy-2,6-dimethyl-

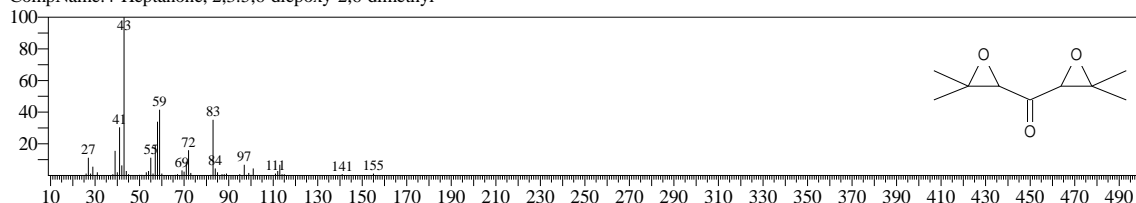

Hit#:2 Entry:61589 Library:NIST08.LIB

SI:81 Formula:C<sub>14</sub>H<sub>28</sub>O<sub>2</sub> CAS:60826-26-8 MolWeight:228 RetIndex:1516

CompName:3-Acetoxydodecane \$ 1-Ethyldecyl acetate # \$

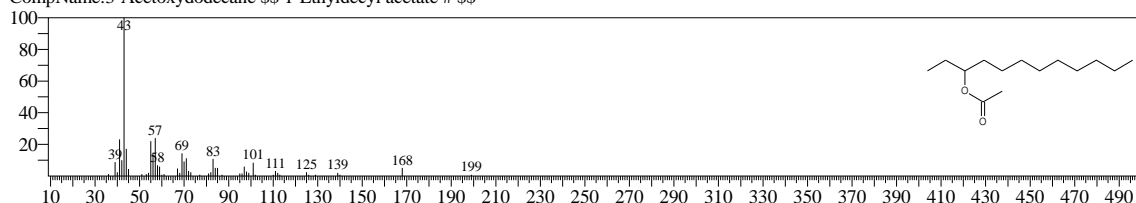

Hit#:3 Entry:19163 Library:NIST08.LIB

SI:80 Formula:C<sub>9</sub>H<sub>18</sub>O<sub>2</sub> CAS:102840-52-8 MolWeight:158 RetIndex:1009

CompName:Pentan-2-ol, 4-allyloxy-2-methyl- \$ 4-(Allyloxy)-2-methyl-2-pentanol # \$

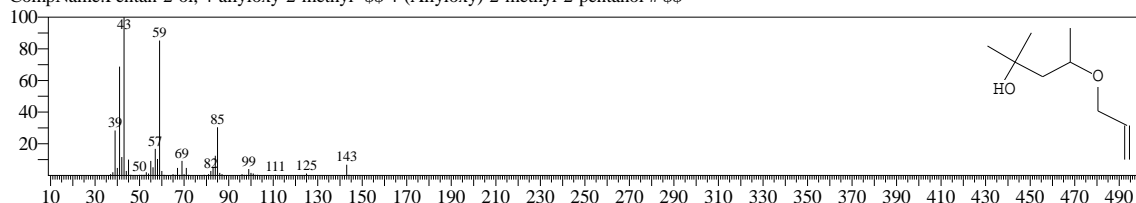

Hit#:4 Entry:8884 Library:NIST08.LIB

SI:79 Formula:C<sub>6</sub>H<sub>14</sub>O<sub>3</sub> CAS:7564-64-9 MolWeight:134 RetIndex:1195

CompName:1,3,5-Pentanetriol, 3-methyl- \$ Pentanetriol, methyl \$ 3-Methyl-1,3,5-pentanetriol \$

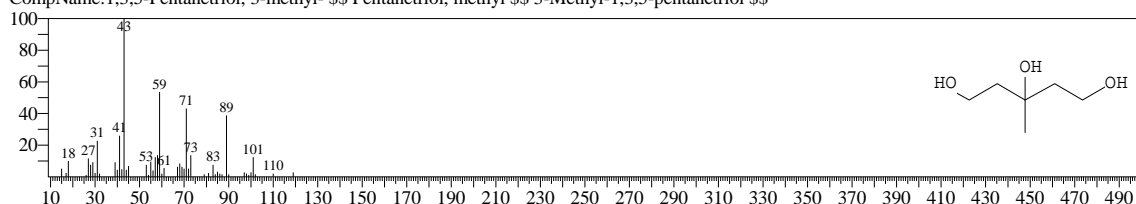

Hit#:5 Entry:4947 Library:NIST08.LIB

SI:78 Formula:C<sub>6</sub>H<sub>14</sub>O<sub>2</sub> CAS:24254-56-6 MolWeight:118 RetIndex:914

CompName:Hydroperoxide, 1-ethylbutyl \$ 3-Hexyl hydroperoxide \$ 1-Ethylbutyl hydroperoxide \$ 3-Hydroperoxyhexane \$

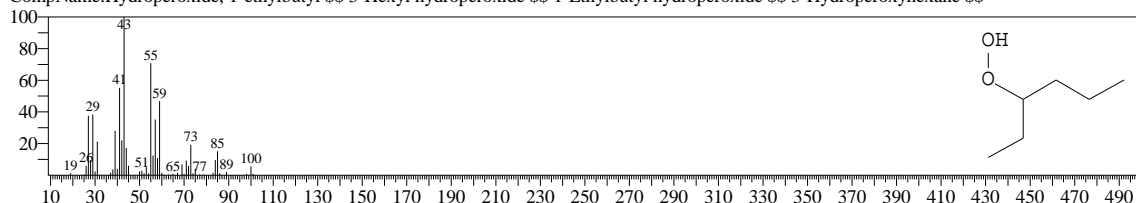

<< Target >>

Line#:10 R.Time:11.900(Scan#:1681) MassPeaks:250

RawMode:Averaged 11.895-11.905(1680-1682) BasePeak:120.05(18470)

BG Mode:Calc. from Peak Group 1 - Event 1

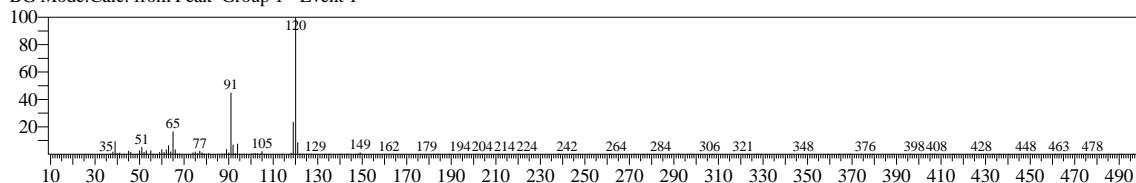

Hit#:1 Entry:5289 Library:NIST08.LIB

SI:92 Formula:C<sub>8</sub>H<sub>8</sub>O CAS:496-16-2 MolWeight:120 RetIndex:1036

CompName:Benzo-furan, 2,3-dihydro- \$\$ Coumaran \$\$ Dihydrobenzofuran \$\$ Dihydrocoumarone \$\$ Kumaran \$\$ 2,3-Dihydrobenzofuran \$\$ 2,3-Dihydrocoumarone

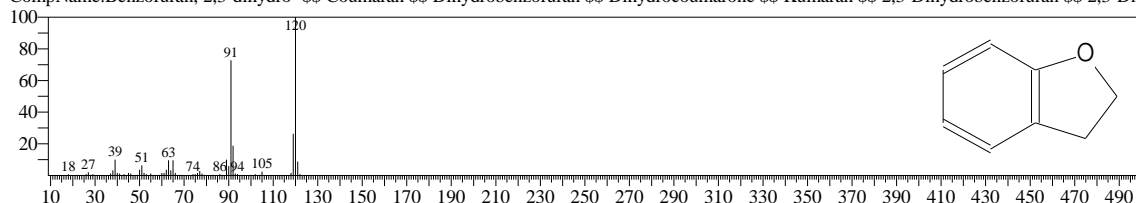

Hit#:2 Entry:15047 Library:NIST08.LIB

SI:88 Formula:C<sub>8</sub>H<sub>10</sub>N<sub>2</sub>O CAS:937-24-6 MolWeight:150 RetIndex:1365

CompName:p-Toluidine, N-methyl-N-nitroso- \$\$ 1-Methyl-1-(4-methylphenyl)-2-oxohydrazine # \$\$

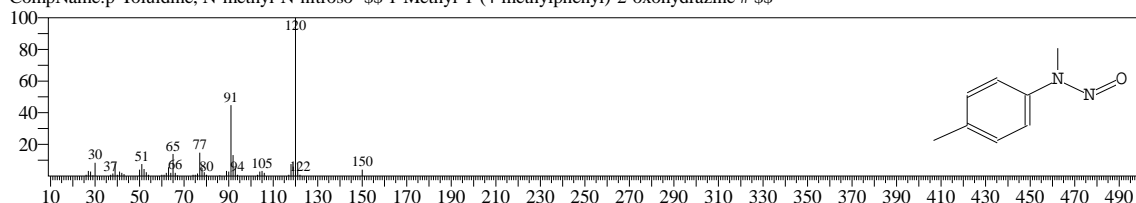

Hit#:3 Entry:3982 Library:NIST08s.LIB

SI:87 Formula:C<sub>8</sub>H<sub>8</sub>O CAS:766-94-9 MolWeight:120 RetIndex:959

CompName:Benzene, (ethenyloxy)- \$\$ Ether, phenyl vinyl \$\$ (Vinylloxy)benzene \$\$ Phenoxyethene \$\$ Phenoxyethylene \$\$ Phenyl vinyl ether \$\$ Vinyl phenyl ether

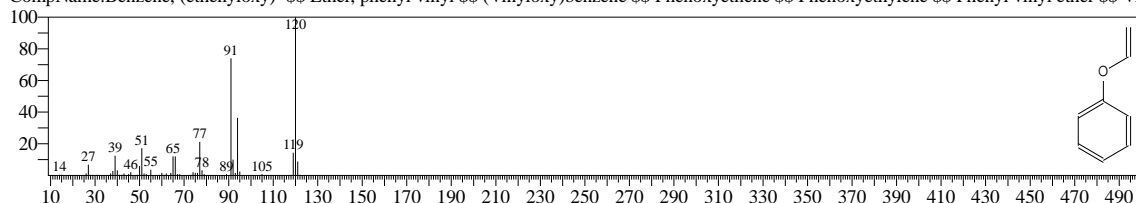

Hit#:4 Entry:14485 Library:NIST08.LIB

SI:86 Formula:C<sub>10</sub>H<sub>12</sub>O CAS:5459-40-5 MolWeight:148 RetIndex:1172

CompName:4-Ethoxystyrene \$\$ p-Ethoxystyrene \$\$ Benzene, 1-ethenyl-4-ethoxy- \$\$ 1-Ethoxy-4-vinylbenzene # \$\$

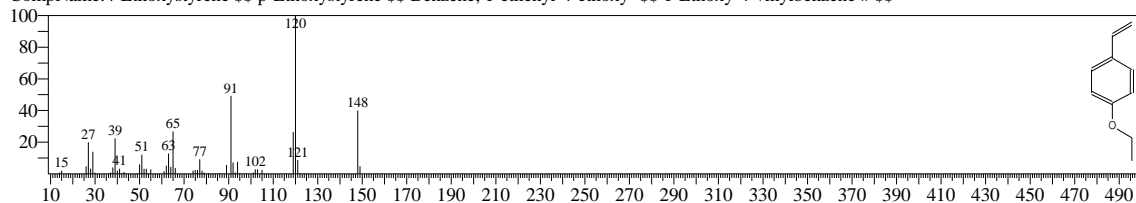

Hit#:5 Entry:3981 Library:NIST08s.LIB

SI:84 Formula:C<sub>8</sub>H<sub>8</sub>O CAS:104-87-0 MolWeight:120 RetIndex:1095

CompName:Benzaldehyde, 4-methyl- \$\$ p-Tolualdehyde \$\$ p-Formyltoluene \$\$ p-Methylbenzaldehyde \$\$ p-Tolualdehyde \$\$ p-Tolylaldehyde \$\$ 4-Methylbenzaldehyde

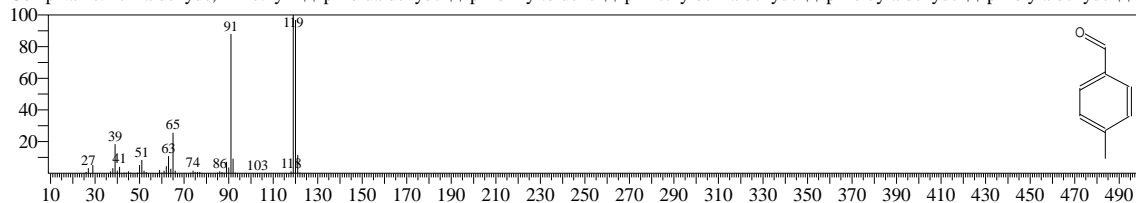

<< Target >>

Line#:11 R.Time:17.920(Scan#:2885) MassPeaks:265

RawMode:Averaged 17.915-17.925(2884-2886) BasePeak:43.00(10422)

BG Mode:Calc. from Peak Group 1 - Event 1

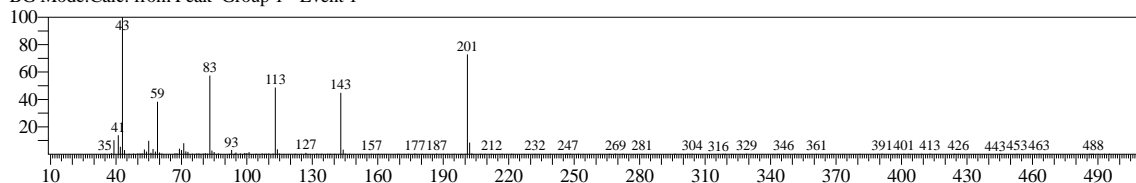

Hit#:1 Entry:52740 Library:NIST08.LIB

SI:73 Formula:C<sub>9</sub>H<sub>12</sub>O<sub>6</sub> CAS:29514-28-1 MolWeight:216 RetIndex:1639

CompName:1,2-O-Isopropylidene-beta-l-idofuranurono-6,3-lactone

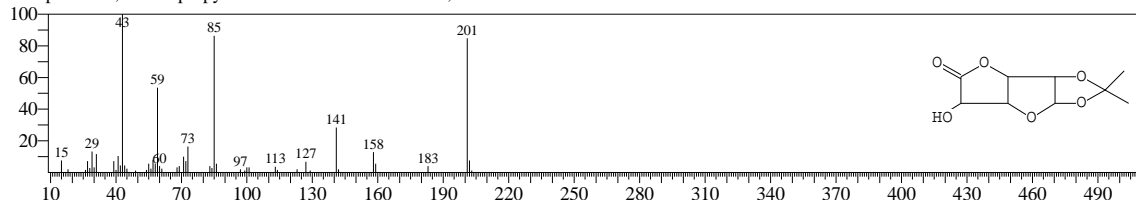

Hit#:2 Entry:18947 Library:NIST08.LIB

SI:72 Formula:C<sub>7</sub>H<sub>10</sub>O<sub>4</sub> CAS:79-91-4 MolWeight:158 RetIndex:1377

CompName:Terebic acid \$\$\$\$ dl-Terebic acid \$\$\$\$ 3-Furancarboxylic acid, tetrahydro-2,2-dimethyl-5-oxo- \$\$\$\$ 2,2-Dimethyl-5-oxotetrahydro-3-furancarboxylic acid

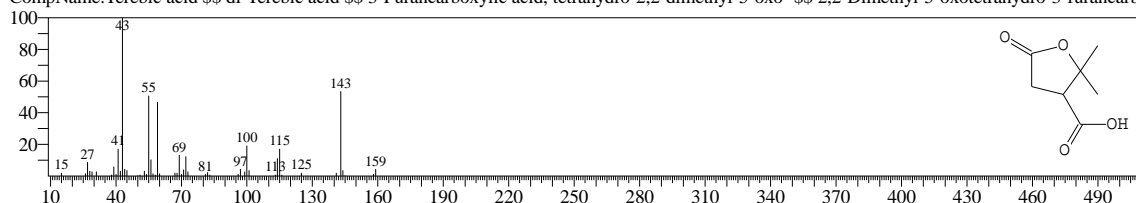

Hit#:3 Entry:25303 Library:NIST08.LIB

SI:72 Formula:C<sub>9</sub>H<sub>14</sub>O<sub>3</sub> CAS:6228-86-0 MolWeight:170 RetIndex:1104

CompName:4-Heptanone, 2,3:5,6-diepoxy-2,6-dimethyl-

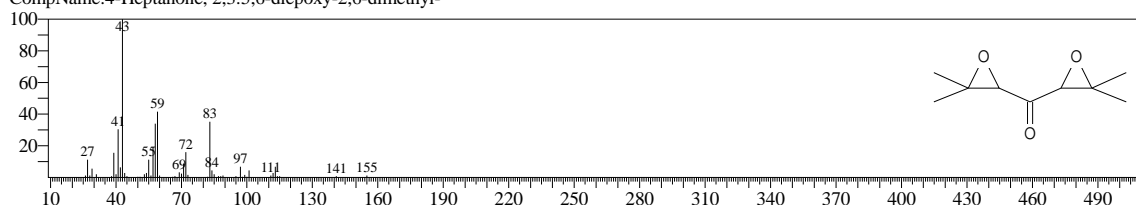

Hit#:4 Entry:22924 Library:NIST08s.LIB

SI:72 Formula:C<sub>12</sub>H<sub>18</sub>O<sub>7</sub> CAS:25253-46-7 MolWeight:274 RetIndex:1875

CompName:.alpha.-D-Galactopyranuronic acid, 1,2:3,4-bis-O-(1-methylethylidene)- \$\$\$\$ Galactopyranuronic acid, 1,2:3,4-di-O-isopropylidene-, .alpha.

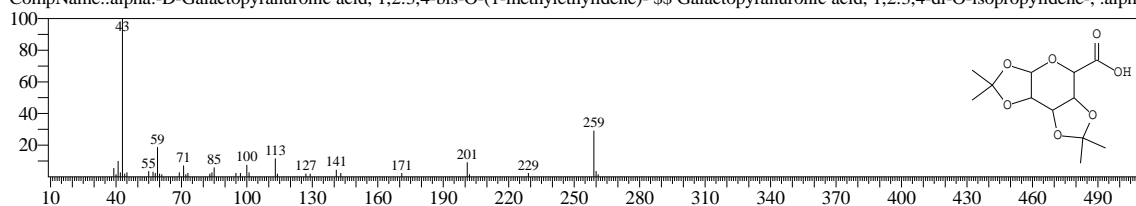

Hit#:5 Entry:5036 Library:NIST08s.LIB

SI:70 Formula:C<sub>8</sub>H<sub>16</sub>O CAS:3358-28-9 MolWeight:128 RetIndex:858

CompName:Furan, tetrahydro-2,2,4,4-tetramethyl- \$\$\$\$ 2,2,4,4-Tetramethyltetrahydrofuran \$\$\$\$ Tetrahydrofuran, 2,2,4,4-tetramethyl-

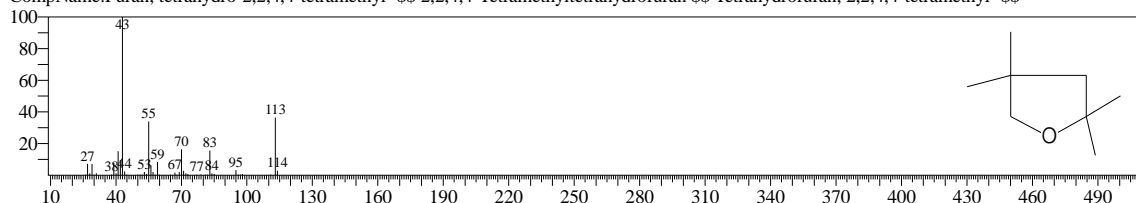

<< Target >>

Line#:12 R.Time:23.945(Scan#:4090) MassPeaks:311

RawMode:Averaged 23.940-23.950(4089-4091) BasePeak:191.10(28646)

BG Mode:Calc. from Peak Group 1 - Event 1

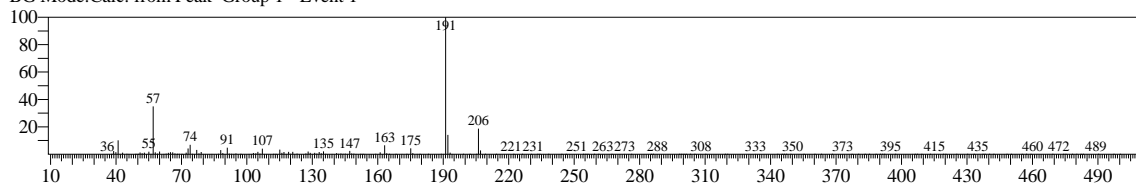

Hit#:1 Entry:17395 Library:NIST08s.LIB

SI:95 Formula:C<sub>14</sub>H<sub>22</sub>O CAS:96-76-4 MolWeight:206 RetIndex:1555

CompName:Phenol, 2,4-bis(1,1-dimethylethyl)- \$\$ Phenol, 2,4-di-tert-butyl- \$ 2,4-Di-tert-butylphenol \$ 2,4-di-t-Butylphenol \$ 1-Hydroxy-2,4-di-

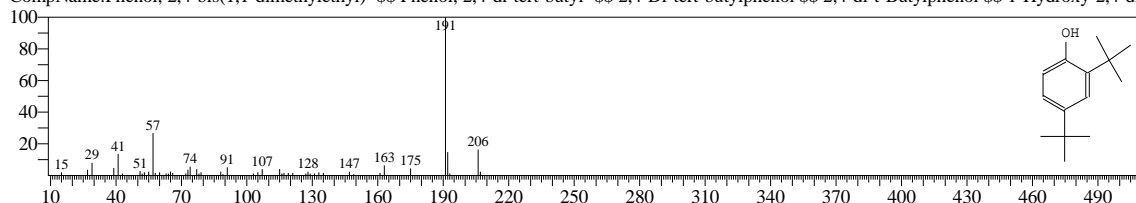

Hit#:2 Entry:17391 Library:NIST08s.LIB

SI:91 Formula:C<sub>14</sub>H<sub>22</sub>O CAS:5875-45-6 MolWeight:206 RetIndex:1555

CompName:Phenol, 2,5-bis(1,1-dimethylethyl)- \$\$ Phenol, 2,5-di-tert-butyl- \$ 2,5-Di-tert-butylphenol \$

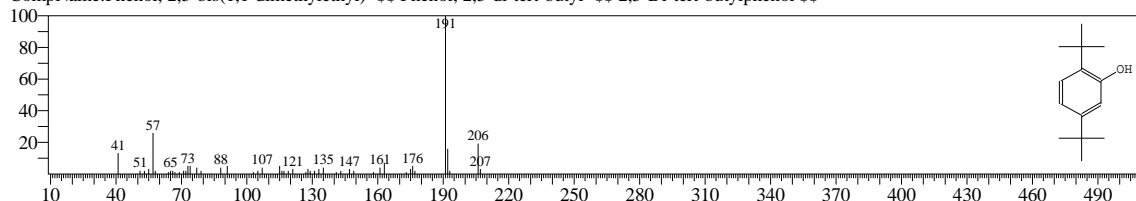

Hit#:3 Entry:46783 Library:NIST08.LIB

SI:91 Formula:C<sub>14</sub>H<sub>22</sub>O CAS:1138-52-9 MolWeight:206 RetIndex:1555

CompName:Phenol, 3,5-bis(1,1-dimethylethyl)- \$\$ Phenol, 3,5-di-tert-butyl- \$ 3,5-Di-tert-butylphenol \$ Phenol, 3,5-bis(t-butyl) \$ 3,5-Di-t-butylp

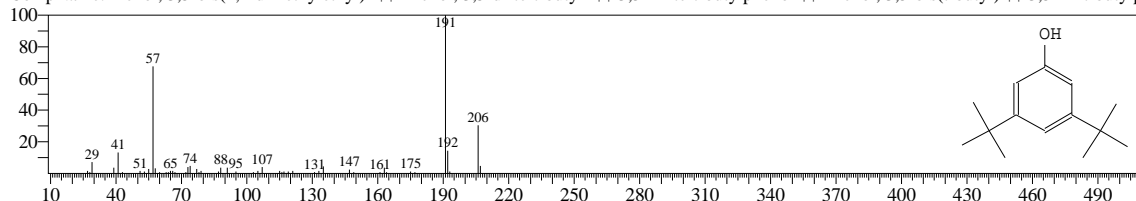

Hit#:4 Entry:46784 Library:NIST08.LIB

SI:91 Formula:C<sub>14</sub>H<sub>22</sub>O CAS:128-39-2 MolWeight:206 RetIndex:1555

CompName:Phenol, 2,6-bis(1,1-dimethylethyl)- \$\$ Phenol, 2,6-di-tert-butyl- \$ 2,6-Bis(tert-butyl)phenol \$ 2,6-Bis(1,1-dimethylethyl)phenol \$ 2,6-

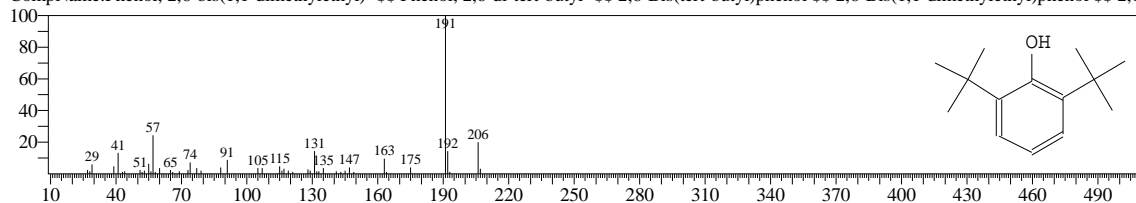

Hit#:5 Entry:116470 Library:NIST08.LIB

SI:86 Formula:C<sub>19</sub>H<sub>30</sub>O<sub>3</sub> CAS:166273-38-7 MolWeight:306 RetIndex:2255

CompName:Pentanoic acid, 5-hydroxy-, 2,4-di-t-butylphenyl esters \$ 2,4-Ditert-butylphenyl 5-hydroxypentanoate # \$

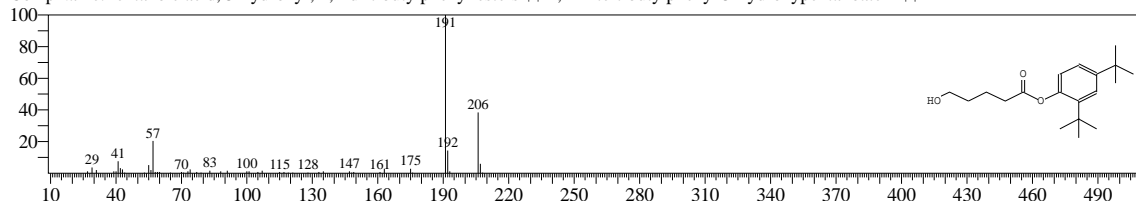

<< Target >>

Line#13 R.Time:27.265(Scan#:4754) MassPeaks:248

RawMode:Averaged 27.260-27.270(4753-4755) BasePeak:149.05(11526)

BG Mode:Calc. from Peak Group 1 - Event 1

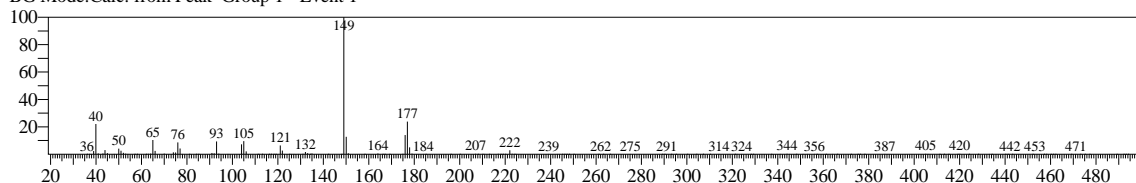

Hit#1 Entry:19021 Library:NIST08s.LIB

SI:92 Formula:C12H14O4 CAS:84-66-2 MolWeight:222 RetIndex:1639

CompName:Diethyl Phthalate \$\$ 1,2-Benzenedicarboxylic acid, diethyl ester \$\$ Phthalic acid, diethyl ester \$\$ o-Benzenedicarboxylic acid, diethyl ester

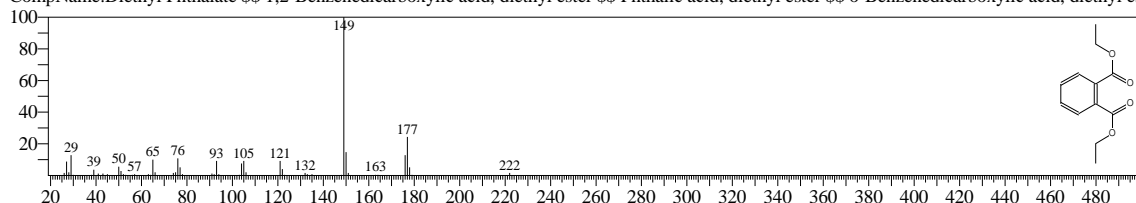

Hit#2 Entry:65189 Library:NIST08.LIB

SI:83 Formula:C13H14O4 CAS:33672-94-5 MolWeight:234 RetIndex:1729

CompName:Phthalic acid, allyl ethyl ester \$\$ Ethylallylphthalate \$\$ 1-Allyl 2-ethyl phthalate # \$\$

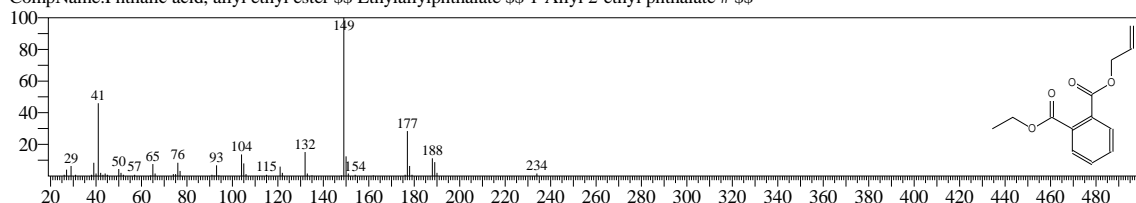

Hit#3 Entry:66452 Library:NIST08.LIB

SI:82 Formula:C13H16O4 CAS:0-00-0 MolWeight:236 RetIndex:1674

CompName:Phthalic acid, ethyl isopropyl ester

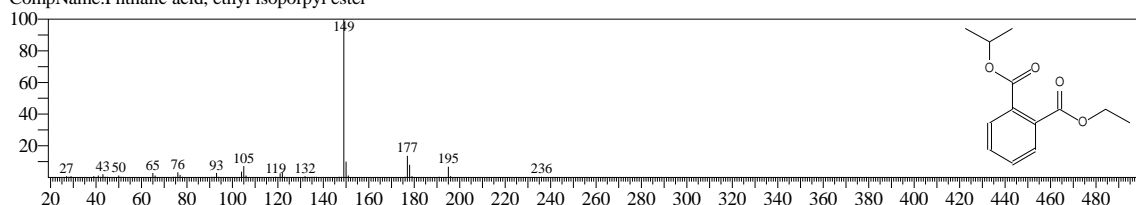

Hit#4 Entry:86068 Library:NIST08.LIB

SI:81 Formula:C15H20O4 CAS:0-00-0 MolWeight:264 RetIndex:1937

CompName:Phthalic acid, ethyl pentyl ester

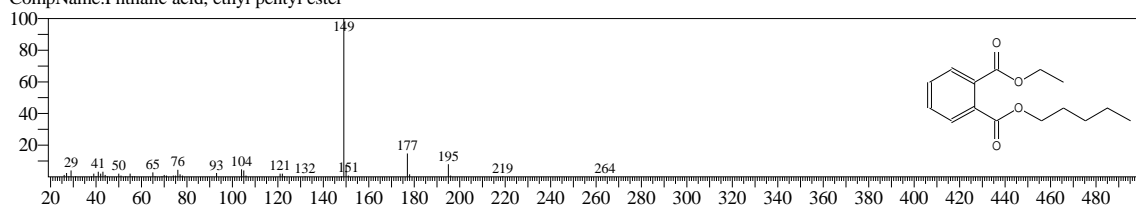

Hit#5 Entry:81995 Library:NIST08.LIB

SI:80 Formula:C15H14O4 CAS:0-00-0 MolWeight:258 RetIndex:1943

CompName:Phthalic acid, ethyl pent-2-en-4-yn-1-yl ester

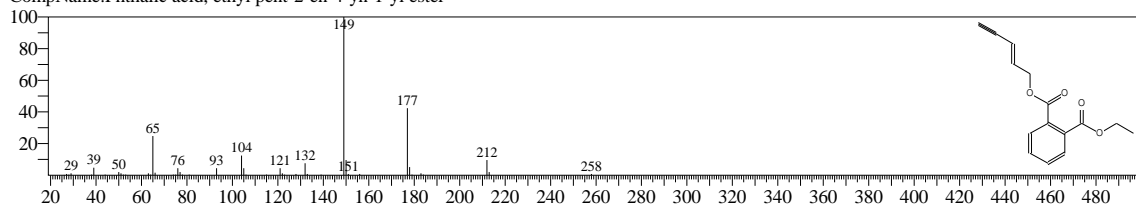

<< Target >>

Line#:14 R.Time:36.195(Scan#:6540) MassPeaks:268

RawMode:Averaged 36.190-36.200(6539-6541) BasePeak:68.05(23099)

BG Mode:Calc. from Peak Group 1 - Event 1

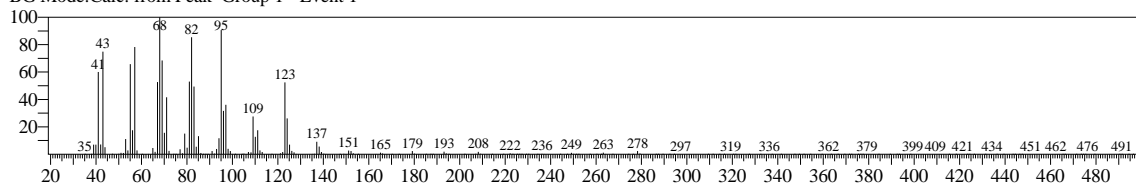

Hit#:1 Entry:109355 Library:NIST08.LIB

SI:92 Formula:C<sub>20</sub>H<sub>40</sub>O CAS:102608-53-7 MolWeight:296 RetIndex:2045

CompName:3,7,11,15-Tetramethyl-2-hexadecen-1-ol (2E)-3,7,11,15-Tetramethyl-2-hexadecen-1-ol #

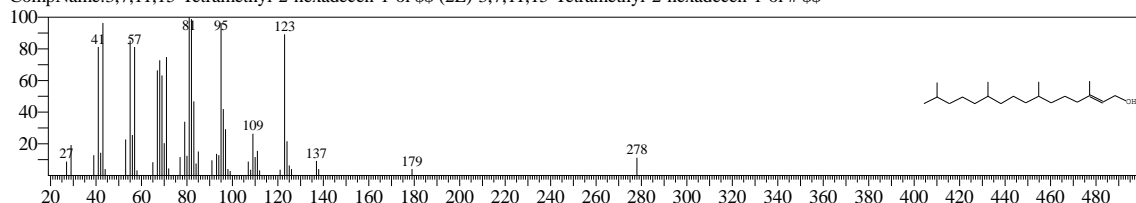

Hit#:2 Entry:60326 Library:NIST08.LIB

SI:89 Formula:C<sub>15</sub>H<sub>30</sub>O CAS:2765-11-9 MolWeight:226 RetIndex:1701

CompName:Pentadecanal-

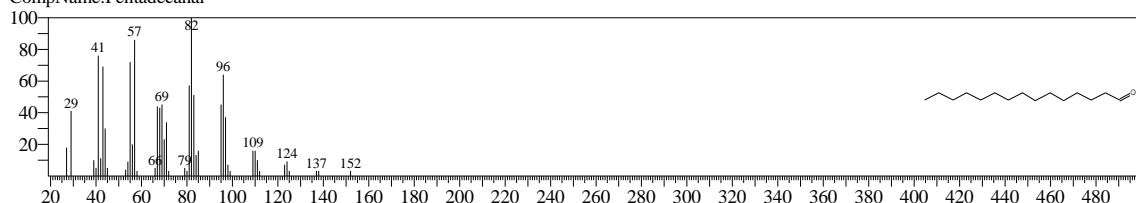

Hit#:3 Entry:20687 Library:NIST08s.LIB

SI:88 Formula:C<sub>16</sub>H<sub>32</sub>O CAS:7320-37-8 MolWeight:240 RetIndex:1702

CompName:Oxirane, tetradecyl- Hexadecane, 1,2-epoxy- Hexadecylene oxide 1,2-Epoxyhexadecane 1,2-Hexadecane oxide 1,2-Hexadecane oxide

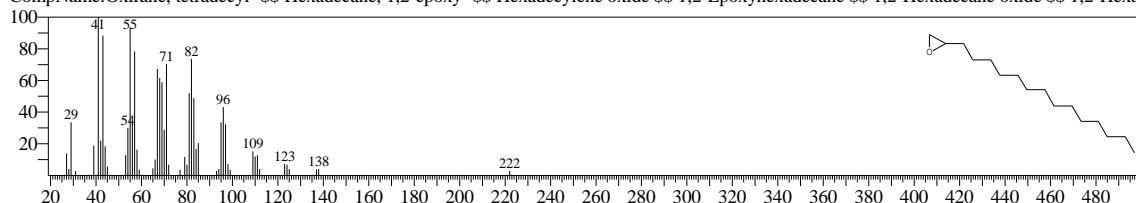

Hit#:4 Entry:22616 Library:NIST08s.LIB

SI:88 Formula:C<sub>18</sub>H<sub>36</sub>O CAS:143-28-2 MolWeight:268 RetIndex:2061

CompName:Oleyl Alcohol 9-Octadecen-1-ol, (Z)- cis-9-Octadecen-1-ol cis-9-Octadecenyl Alcohol Adol 320 Adol 85 Atalco O

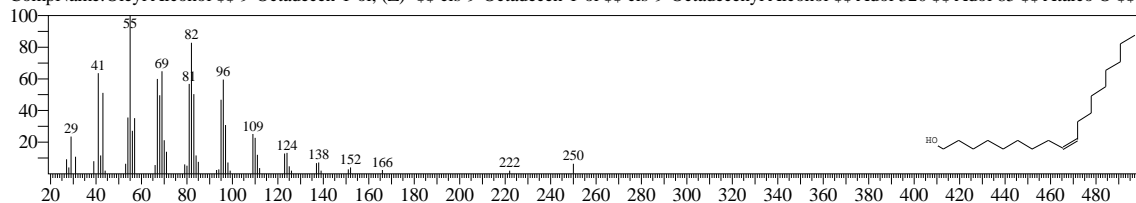

Hit#:5 Entry:96439 Library:NIST08.LIB

SI:88 Formula:C<sub>20</sub>H<sub>38</sub> CAS:71899-38-2 MolWeight:278 RetIndex:2027

CompName:9-Eicosyne 9-Icosyne

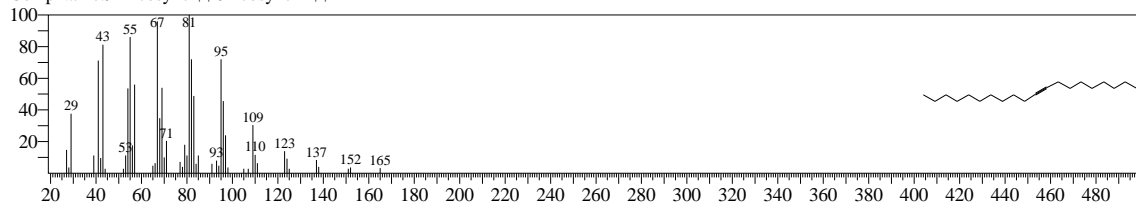

<< Target >>

Line#:15 R.Time:36.435(Scan#:6588) MassPeaks:261

RawMode:Averaged 36.430-36.440(6587-6589) BasePeak:70.05(2089)

BG Mode:Calc. from Peak Group 1 - Event 1

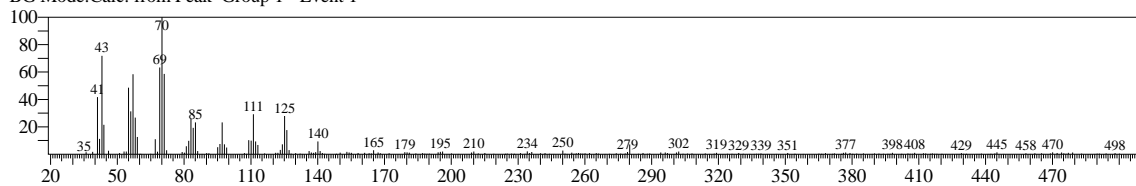

Hit#:1 Entry:97786 Library:NIST08.LIB

SI:91 Formula:C<sub>20</sub>H<sub>40</sub> CAS:14237-73-1 MolWeight:280 RetIndex:1802

CompName:2-Hexadecene, 3,7,11,15-tetramethyl-, [R-[R\*,R\*-(E)]]- (2E)-3,7,11,15-Tetramethyl-2-hexadecene # \$\$

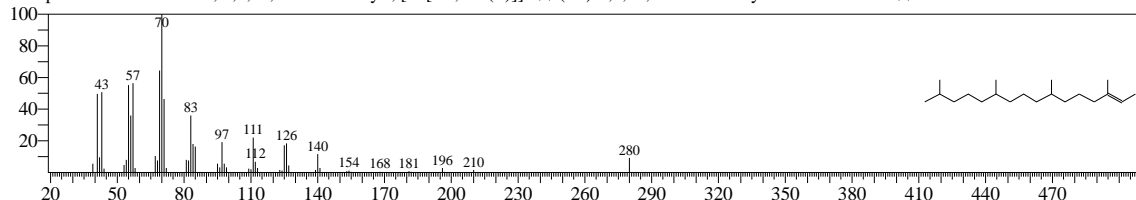

Hit#:2 Entry:24266 Library:NIST08s.LIB

SI:88 Formula:C<sub>20</sub>H<sub>42</sub>O CAS:645-72-7 MolWeight:298 RetIndex:1996

CompName:1-Hexadecanol, 3,7,11,15-tetramethyl- (Dihydrophytol) (3,7,11,15-Tetramethylhexadecanol) (3,7,11,15-Tetramethyl-1-hexadecanol) :

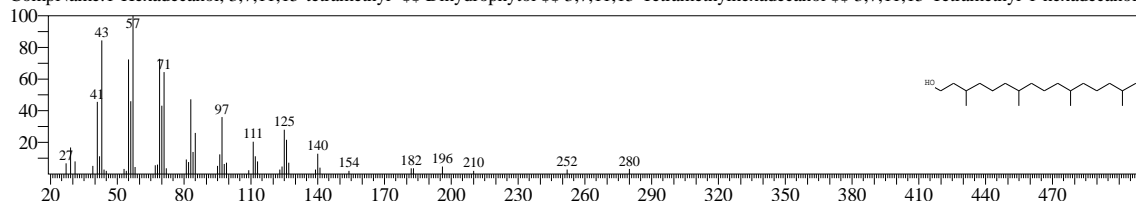

Hit#:3 Entry:139317 Library:NIST08.LIB

SI:88 Formula:C<sub>22</sub>H<sub>44</sub>O<sub>2</sub> CAS:0-00-0 MolWeight:340 RetIndex:2119

CompName:Acetic acid, 3,7,11,15-tetramethyl-hexadecyl ester

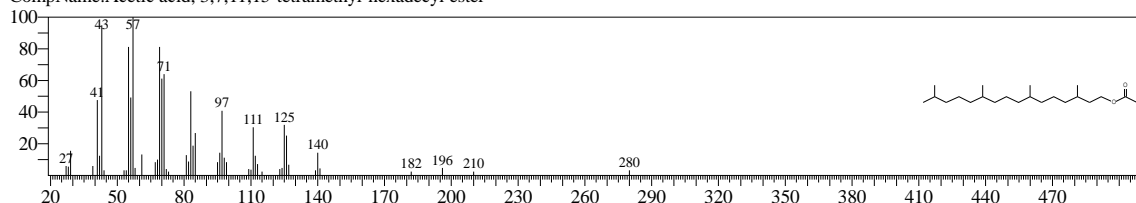

Hit#:4 Entry:19721 Library:NIST08s.LIB

SI:87 Formula:C<sub>15</sub>H<sub>32</sub>O CAS:6750-34-1 MolWeight:228 RetIndex:1563

CompName:1-Dodecanol, 3,7,11-trimethyl- (Hexa-hydro-farnesol) (3,7,11-Trimethyl-1-dodecanol) (3,7,11-Trimethyl-1-dodecanol) :

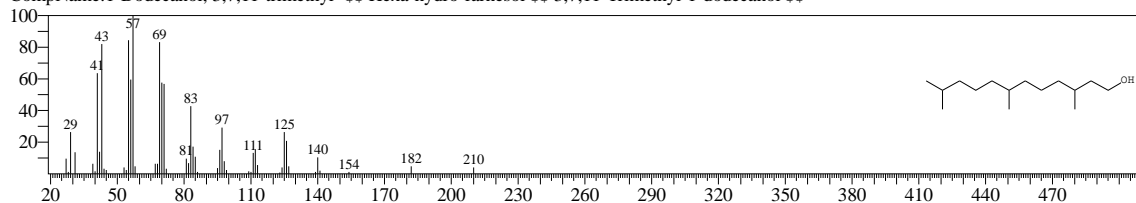

Hit#:5 Entry:26820 Library:NIST08.LIB

SI:86 Formula:C<sub>11</sub>H<sub>24</sub>O CAS:91337-07-4 MolWeight:172 RetIndex:1165

CompName:2-Isopropyl-5-methyl-1-heptanol

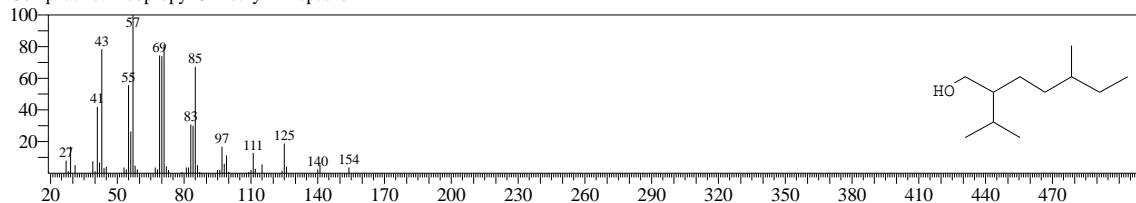

<< Target >>

Line#:16 R.Time:37.055(Scan#:6712) MassPeaks:223

RawMode:Averaged 37.050-37.060(6711-6713) BasePeak:82.05(3078)

BG Mode:Calc. from Peak Group 1 - Event 1

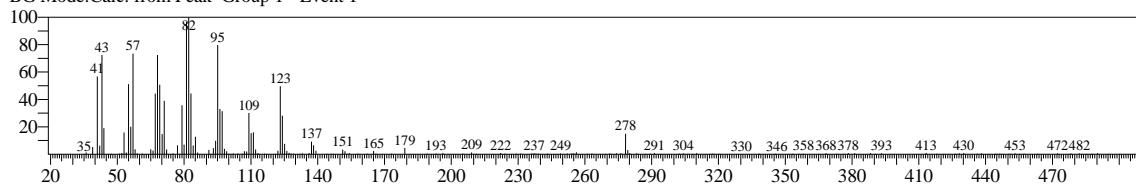

Hit#:1 Entry:109355 Library:NIST08.LIB

SI:92 Formula:C<sub>20</sub>H<sub>40</sub>O CAS:102608-53-7 MolWeight:296 RetIndex:2045

CompName:3,7,11,15-Tetramethyl-2-hexadecen-1-ol (2E)-3,7,11,15-Tetramethyl-2-hexadecen-1-ol # \$\$

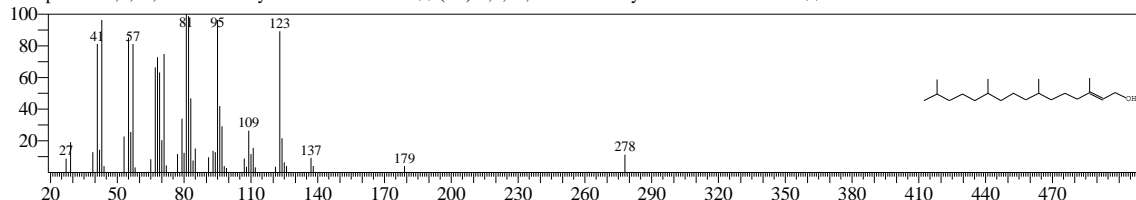

Hit#:2 Entry:60326 Library:NIST08.LIB

SI:88 Formula:C<sub>15</sub>H<sub>30</sub>O CAS:2765-11-9 MolWeight:226 RetIndex:1701

CompName:Pentadecanal-

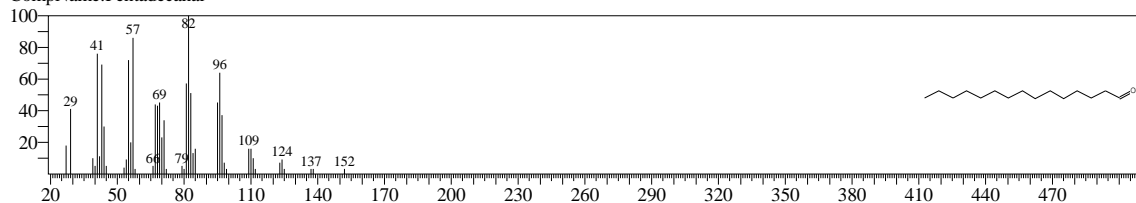

Hit#:3 Entry:96439 Library:NIST08.LIB

SI:87 Formula:C<sub>20</sub>H<sub>38</sub> CAS:71899-38-2 MolWeight:278 RetIndex:2027

CompName:9-Eicosyne \$\$ 9-Icosyne # \$\$

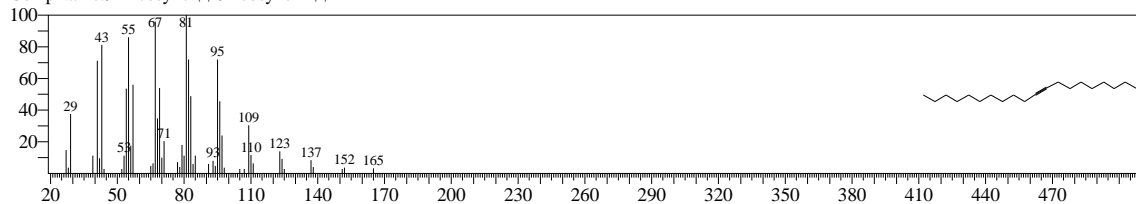

Hit#:4 Entry:96437 Library:NIST08.LIB

SI:87 Formula:C<sub>20</sub>H<sub>38</sub> CAS:0-00-0 MolWeight:278 RetIndex:2007

CompName:1,4-Eicosadiene

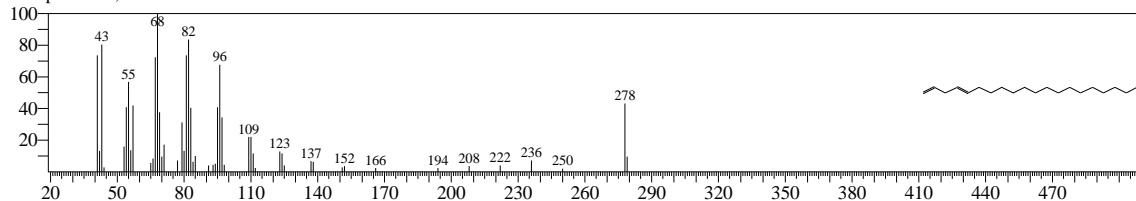

Hit#:5 Entry:86382 Library:NIST08.LIB

SI:87 Formula:C<sub>19</sub>H<sub>36</sub> CAS:35354-38-2 MolWeight:264 RetIndex:1863

CompName:7-Octadecyne, 2-methyl- \$\$ 2-Methyl-7-octadecyne \$\$

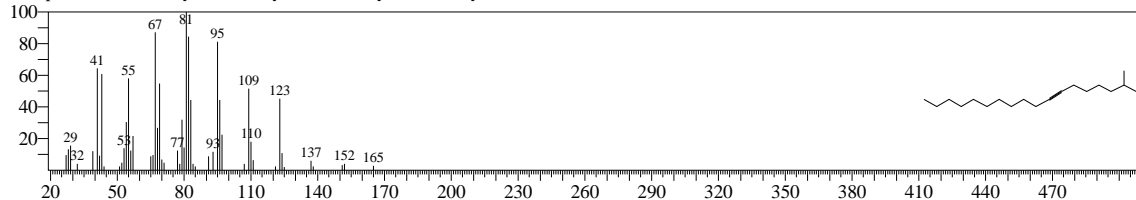

<< Target >>

Line#:17 R.Time:37.675(Scan#:6836) MassPeaks:315

RawMode:Averaged 37.670-37.680(6835-6837) BasePeak:81.05(5585)

BG Mode:Calc. from Peak Group 1 - Event 1

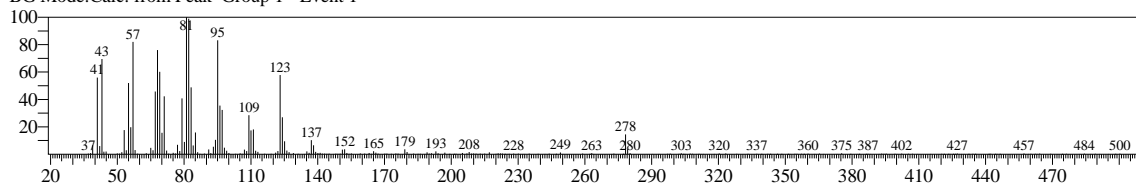

Hit#:1 Entry:109355 Library:NIST08.LIB

SI:94 Formula:C<sub>20</sub>H<sub>40</sub>O CAS:102608-53-7 MolWeight:296 RetIndex:2045

CompName:3,7,11,15-Tetramethyl-2-hexadecen-1-ol (E)-3,7,11,15-Tetramethyl-2-hexadecen-1-ol #

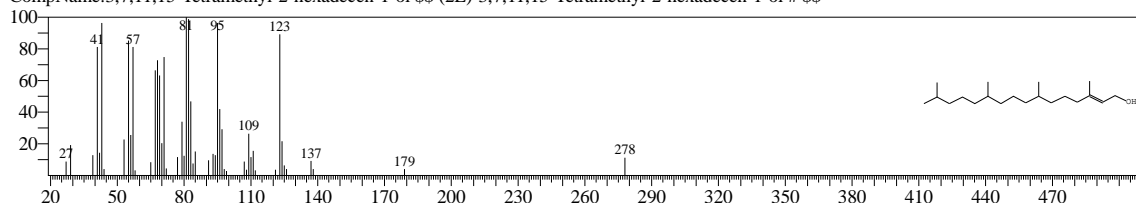

Hit#:2 Entry:96439 Library:NIST08.LIB

SI:88 Formula:C<sub>20</sub>H<sub>38</sub> CAS:71899-38-2 MolWeight:278 RetIndex:2027

CompName:9-Eicosyne 9-Icosyne #

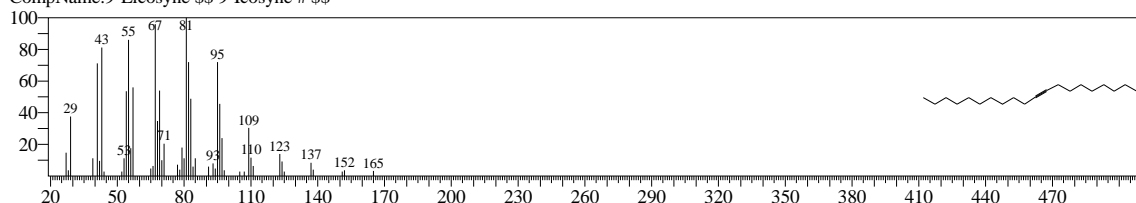

Hit#:3 Entry:96437 Library:NIST08.LIB

SI:88 Formula:C<sub>20</sub>H<sub>38</sub> CAS:0-00-0 MolWeight:278 RetIndex:2007

CompName:1,4-Eicosadiene

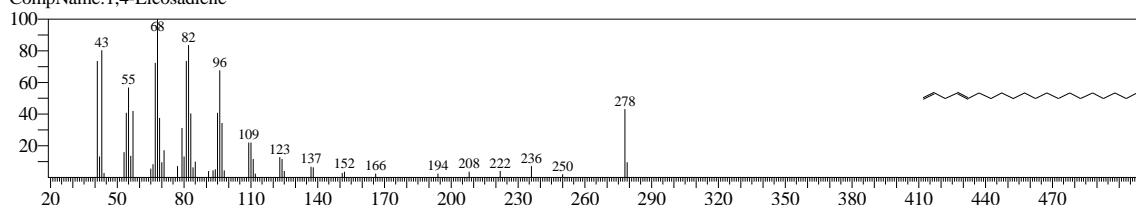

Hit#:4 Entry:86382 Library:NIST08.LIB

SI:88 Formula:C<sub>19</sub>H<sub>36</sub> CAS:35354-38-2 MolWeight:264 RetIndex:1863

CompName:7-Octadecyne, 2-methyl- 2-Methyl-7-octadecyne

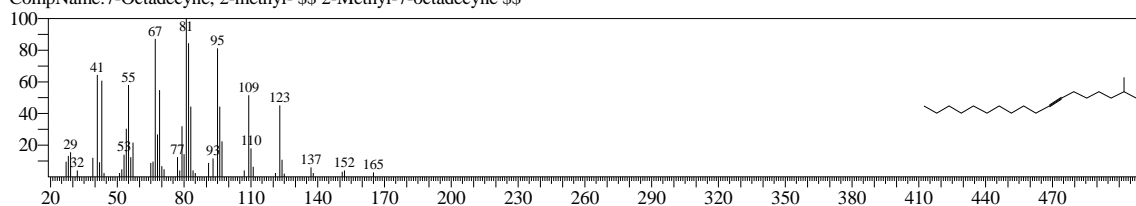

Hit#:5 Entry:89232 Library:NIST08.LIB

SI:87 Formula:C<sub>18</sub>H<sub>36</sub>O CAS:143-28-2 MolWeight:268 RetIndex:2061

CompName:Oleyl Alcohol 9-Octadecen-1-ol, (Z)- 9-Octadecen-1-ol (Z)- 9-Octadecenyl Alcohol Adol 320 Adol 85 Atalco O

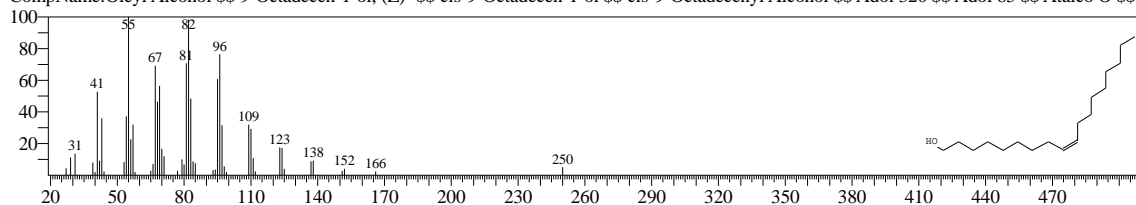

<< Target >>

Line#:18 R.Time:40.525(Scan#:7406) MassPeaks:302

RawMode:Averaged 40.520-40.530(7405-7407) BasePeak:73.00(25488)

BG Mode:Calc. from Peak Group 1 - Event 1

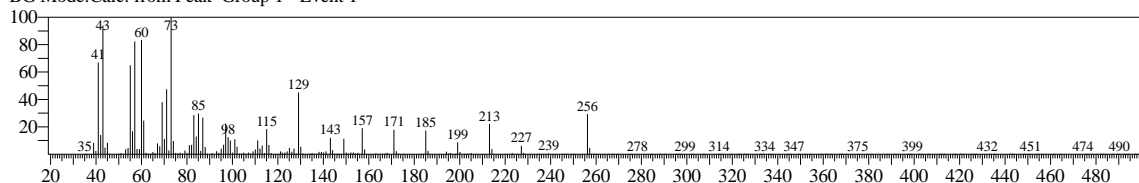

Hit#:1 Entry:21864 Library:NIST08s.LIB

SI:94 Formula:C16H32O2 CAS:57-10-3 MolWeight:256 RetIndex:1968

CompName:n-Hexadecanoic acid \$\$ Hexadecanoic acid \$\$ n-Hexadecoic acid \$\$ Palmitic acid \$\$ Pentadecanecarboxylic acid \$\$ 1-Pentadecanecarbo

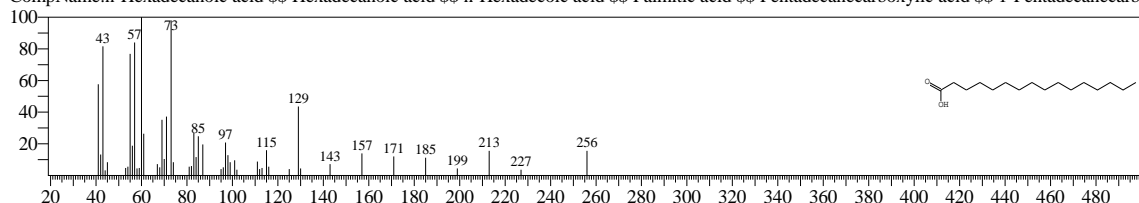

Hit#:2 Entry:20839 Library:NIST08s.LIB

SI:93 Formula:C15H30O2 CAS:1002-84-2 MolWeight:242 RetIndex:1869

CompName:Pentadecanoic acid \$\$ Pentadecylic acid \$\$ n-Pentadecanoic acid \$\$ n-Pentadecylic acid \$\$

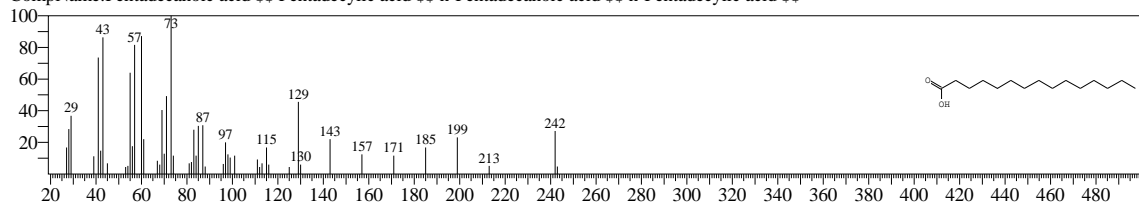

Hit#:3 Entry:189990 Library:NIST08.LIB

SI:91 Formula:C38H68O8 CAS:28474-90-0 MolWeight:652 RetIndex:4765

CompName:l-(+)-Ascorbic acid 2,6-dihexadecanoate

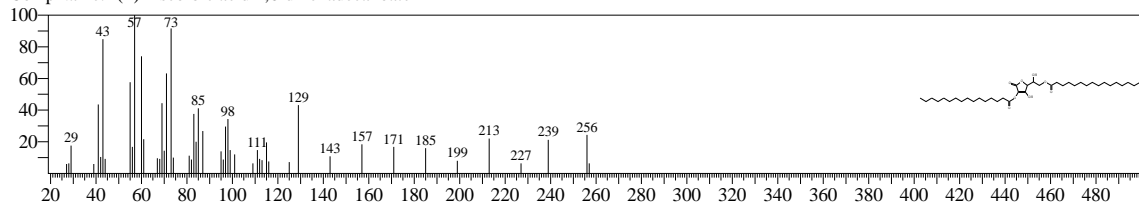

Hit#:4 Entry:23514 Library:NIST08s.LIB

SI:90 Formula:C18H36O2 CAS:57-11-4 MolWeight:284 RetIndex:2167

CompName:Octadecanoic acid \$\$ Stearic acid \$\$ n-Octadecanoic acid \$\$ Humko Industrane R \$\$ Hydrofol Acid 150 \$\$ Hystrene S-97 \$\$ Hystrene 7

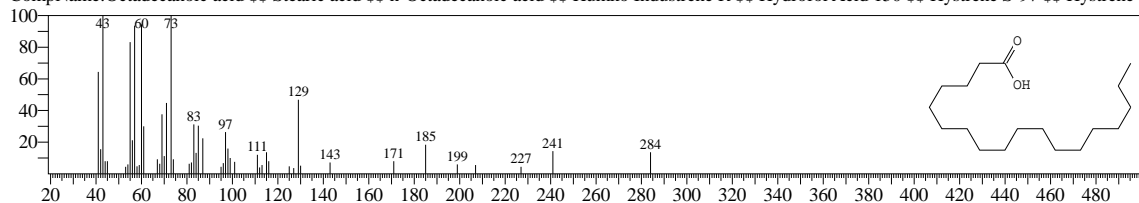

Hit#:5 Entry:61604 Library:NIST08.LIB

SI:90 Formula:C14H28O2 CAS:544-63-8 MolWeight:228 RetIndex:1769

CompName:Tetradecanoic acid \$\$ Myristic acid \$\$ n-Tetradecanoic acid \$\$ n-Tetradecoic acid \$\$ Neo-Fat 14 \$\$ Univol U 316S \$\$ 1-Tridecanecarbo

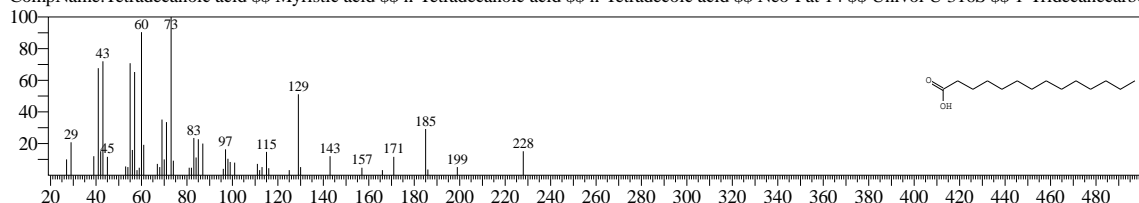

<< Target >>

Line#:19 R.Time:44.870(Scan#:8275) MassPeaks:297

RawMode:Averaged 44.865-44.875(8274-8276) BasePeak:55.00(1469)

BG Mode:Calc. from Peak Group 1 - Event 1

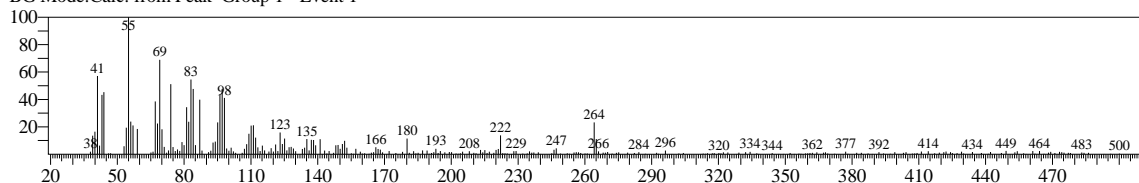

Hit#:1 Entry:24160 Library:NIST08s.LIB

SI:91 Formula:C19H36O2 CAS:1937-62-8 MolWeight:296 RetIndex:2085

CompName:9-Octadecenoic acid, methyl ester, (E)- \$\$ Elaidic acid, methyl ester \$\$ Methyl elaidate \$\$ Methyl trans-9-octadecenoate \$\$ (E)-9-Octadecenoic acid, methyl ester

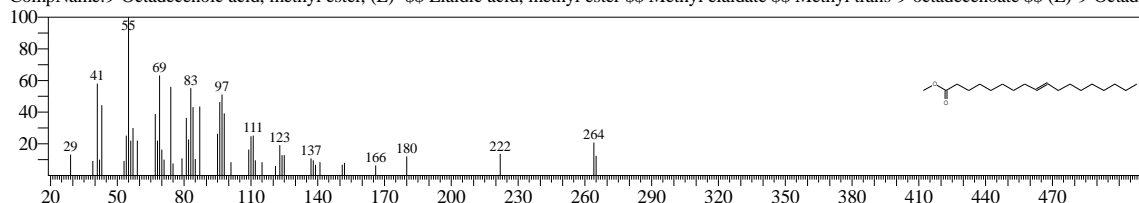

Hit#:2 Entry:109260 Library:NIST08.LIB

SI:90 Formula:C19H36O2 CAS:112-62-9 MolWeight:296 RetIndex:2085

CompName:9-Octadecenoic acid (Z)-, methyl ester \$\$ Oleic acid, methyl ester \$\$ Emery oleic acid ester 2301 \$\$ Methyl cis-9-octadecenoate \$\$ Meth

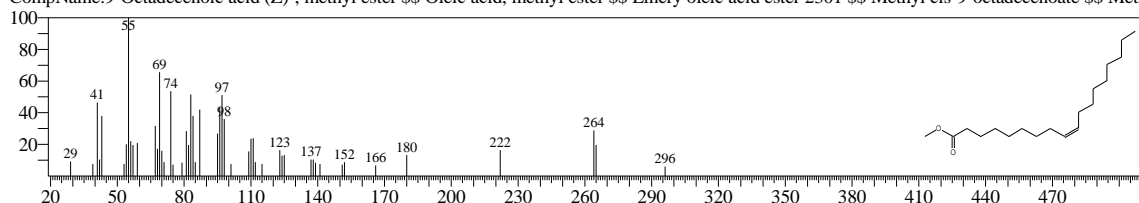

Hit#:3 Entry:24161 Library:NIST08s.LIB

SI:89 Formula:C19H36O2 CAS:52380-33-3 MolWeight:296 RetIndex:2085

CompName:11-Octadecenoic acid, methyl ester \$\$ Methyl 11-octadecenoate \$\$ Octadec-11-enoic acid, methyl ester \$\$ Methyl (11E)-11-octadecenoate

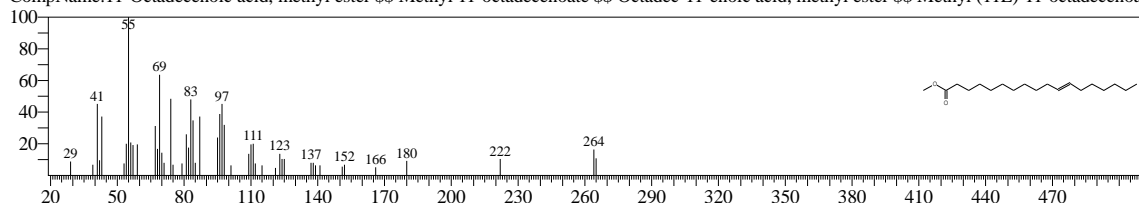

Hit#:4 Entry:109239 Library:NIST08.LIB

SI:89 Formula:C19H36O2 CAS:2345-29-1 MolWeight:296 RetIndex:2085

CompName:8-Octadecenoic acid, methyl ester \$\$ Methyl (8E)-8-octadecenoate # \$\$

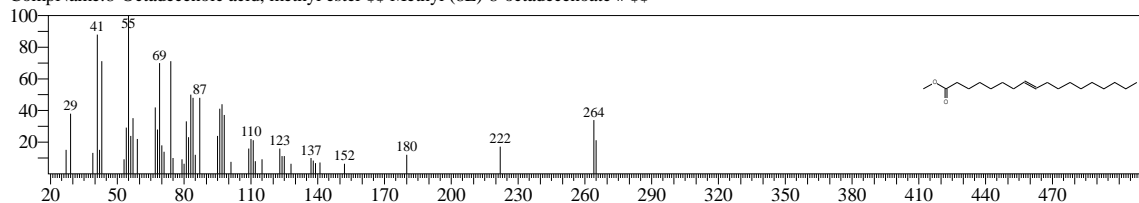

Hit#:5 Entry:109245 Library:NIST08.LIB

SI:88 Formula:C19H36O2 CAS:2462-84-2 MolWeight:296 RetIndex:2085

CompName:9-Octadecenoic acid, methyl ester \$\$ Methyl 9-octadecenoate \$\$ Methyl (9E)-9-octadecenoate # \$\$

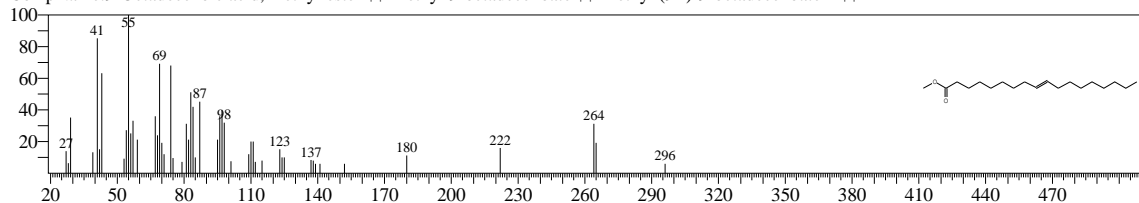

<< Target >>

Line#:20 R.Time:45.255(Scan#:8352) MassPeaks:230

RawMode:Averaged 45.250-45.260(8351-8353) BasePeak:71.05(9520)

BG Mode:Calc. from Peak Group 1 - Event 1

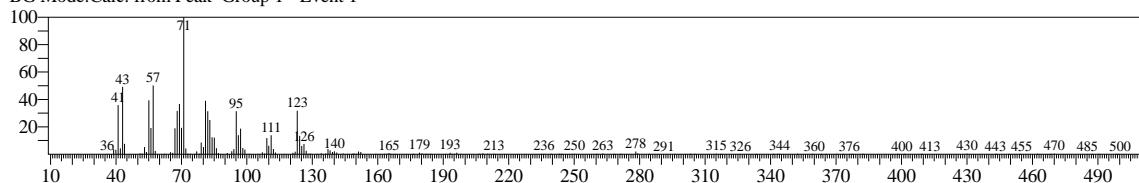

Hit#:1 Entry:24171 Library:NIST08s.LIB

SI:93 Formula:C<sub>20</sub>H<sub>40</sub>O CAS:150-86-7 MolWeight:296 RetIndex:2045

CompName:Phytol \$\$ 2-Hexadecen-1-ol, 3,7,11,15-tetramethyl-, [R-[R\*,R\*-(E)]]- \$\$ trans-Phytol \$\$ 3,7,11,15-Tetramethyl-2-hexadecen-1-ol (2E

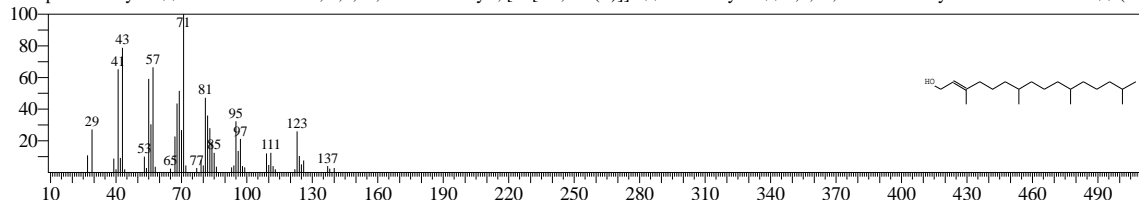

Hit#:2 Entry:18478 Library:NIST08s.LIB

SI:87 Formula:C<sub>10</sub>H<sub>20</sub>O CAS:23283-97-8 MolWeight:156 RetIndex:1164

CompName:Cyclohexanol, 5-methyl-2-(1-methylethyl)-, [1S-(1.alpha.,2.beta.,5.beta.)]- \$\$ (1S,2R,5R)-(+)-Isomenthol \$\$ 2-Isopropyl-5-methylcyclo

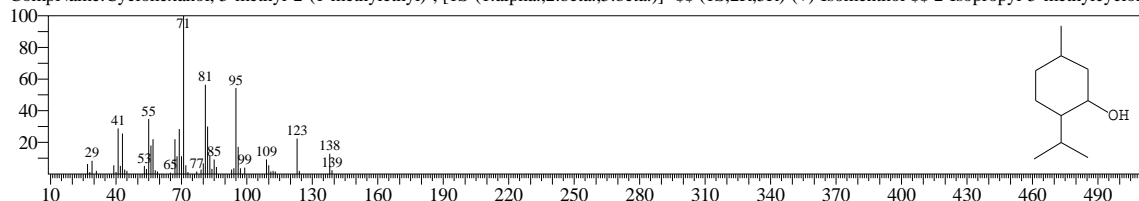

Hit#:3 Entry:9971 Library:NIST08s.LIB

SI:87 Formula:C<sub>10</sub>H<sub>20</sub>O CAS:491-02-1 MolWeight:156 RetIndex:1164

CompName:Cyclohexanol, 5-methyl-2-(1-methylethyl)-, (1.alpha.,2.alpha.,5.alpha.)- \$\$ Menthol, cis-1,3,cis-1,4- \$\$ Neoisomenthol \$\$ 2-Isopropyl-5-

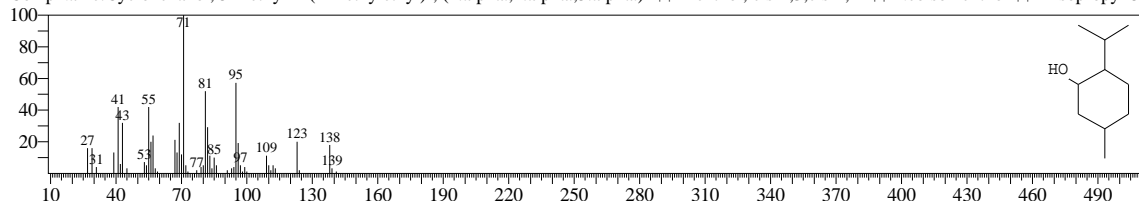

Hit#:4 Entry:18487 Library:NIST08s.LIB

SI:87 Formula:C<sub>10</sub>H<sub>20</sub>O CAS:490-99-3 MolWeight:156 RetIndex:1164

CompName:Cyclohexanol, 5-methyl-2-(1-methylethyl)-, (1.alpha.,2.beta.,5.beta.)- \$\$ Menthol, trans-1,3,cis-1,4- \$\$ Isomenthol \$\$ 2-Isopropyl-5-met

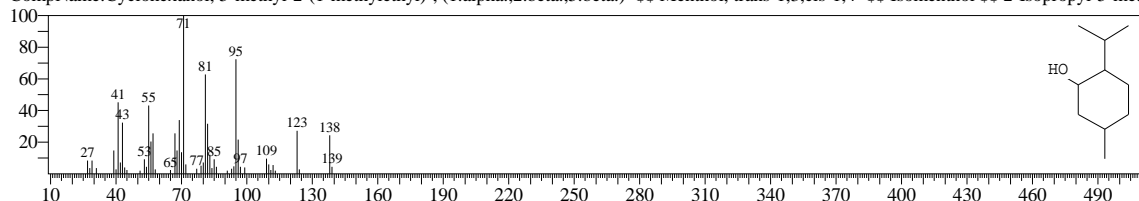

Hit#:5 Entry:9966 Library:NIST08s.LIB

SI:87 Formula:C<sub>10</sub>H<sub>20</sub>O CAS:89-78-1 MolWeight:156 RetIndex:1164

CompName:Cyclohexanol, 5-methyl-2-(1-methylethyl)-, (1.alpha.,2.beta.,5.alpha.)- \$\$ Menthol, cis-1,3,trans-1,4- \$\$ Hexahydrothymol \$\$ Menthacar

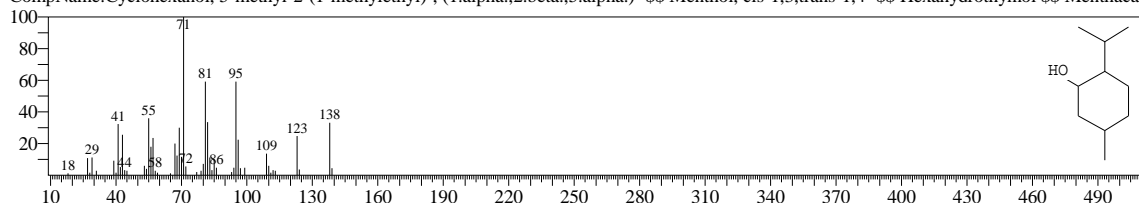

<< Target >>

Line#:21 R.Time:46.135(Scan#:8528) MassPeaks:364

RawMode:Averaged 46.130-46.140(8527-8529) BasePeak:55.05(16189)

BG Mode:Calc. from Peak Group 1 - Event 1

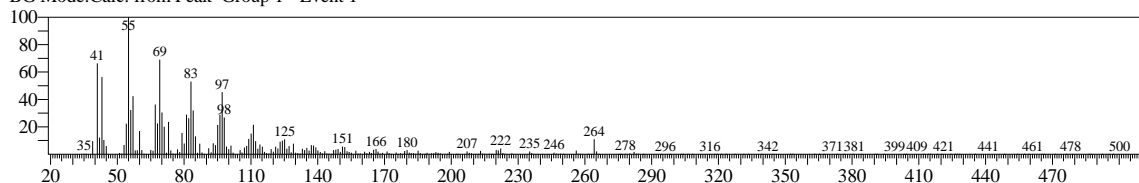

Hit#:1 Entry:23408 Library:NIST08s.LIB

SI:96 Formula:C18H34O2 CAS:112-80-1 MolWeight:282 RetIndex:2175

CompName:Oleic Acid \$ 9-Octadecenoic acid (Z)- \$ \$ .delta.(Sup9)-cis-Oleic acid \$ cis-.delta.(Sup9)-Octadecenoic acid \$ cis-Oleic Acid \$ cis-9-

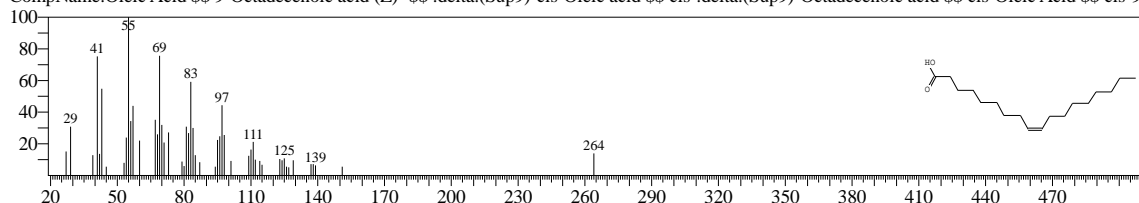

Hit#:2 Entry:99164 Library:NIST08.LIB

SI:93 Formula:C18H34O2 CAS:506-17-2 MolWeight:282 RetIndex:2175

CompName:cis-Vaccenic acid

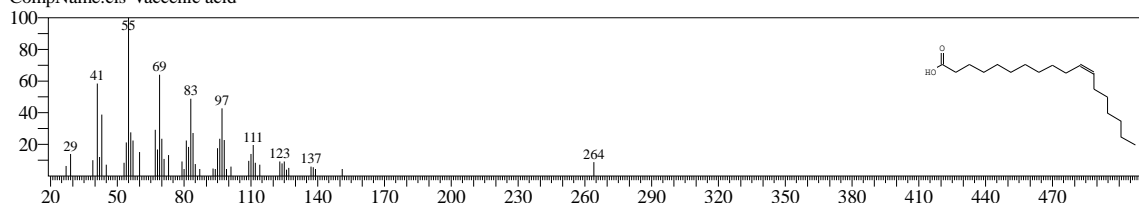

Hit#:3 Entry:109246 Library:NIST08.LIB

SI:93 Formula:C19H36O2 CAS:73033-09-7 MolWeight:296 RetIndex:2274

CompName:cis-10-Nonadecenoic acid

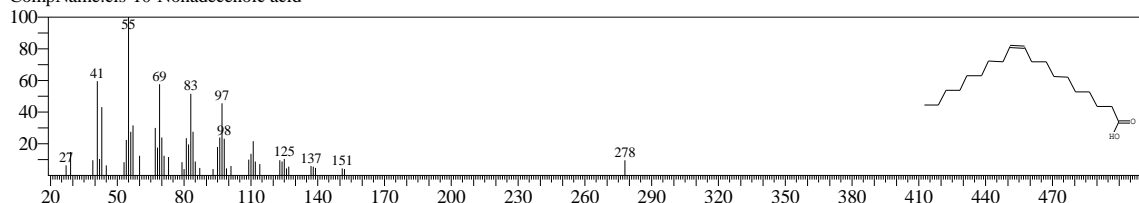

Hit#:4 Entry:119260 Library:NIST08.LIB

SI:92 Formula:C20H38O2 CAS:5561-99-9 MolWeight:310 RetIndex:2374

CompName:cis-11-Eicosenoic acid

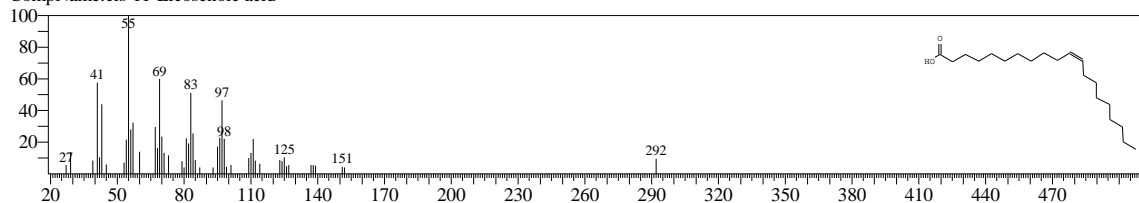

Hit#:5 Entry:89130 Library:NIST08.LIB

SI:92 Formula:C17H32O2 CAS:29743-97-3 MolWeight:268 RetIndex:2075

CompName:cis-10-Heptadecenoic acid

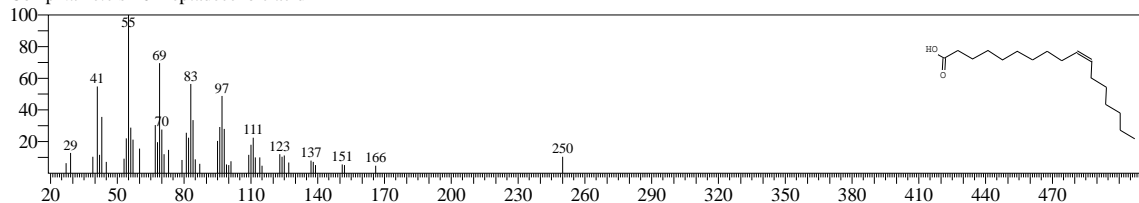

<< Target >>

Line#:22 R.Time:57.705(Scan#:10842) MassPeaks:256

RawMode:Averaged 57.700-57.710(10841-10843) BasePeak:149.05(6372)

BG Mode:Calc. from Peak Group 1 - Event 1

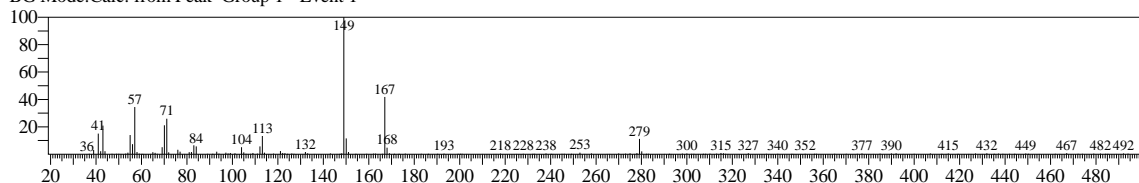

Hit#:1 Entry:164412 Library:NIST08.LIB

SI:95 Formula:C<sub>24</sub>H<sub>38</sub>O<sub>4</sub> CAS:27554-26-3 MolWeight:390 RetIndex:2704

CompName:1,2-Benzenedicarboxylic acid, diisooctyl ester \$\$ Diisooctyl phthalate \$\$ Hexaplas M/O \$\$ Isooctyl phthalate \$\$ Corflex 880 \$\$ DIOP \$

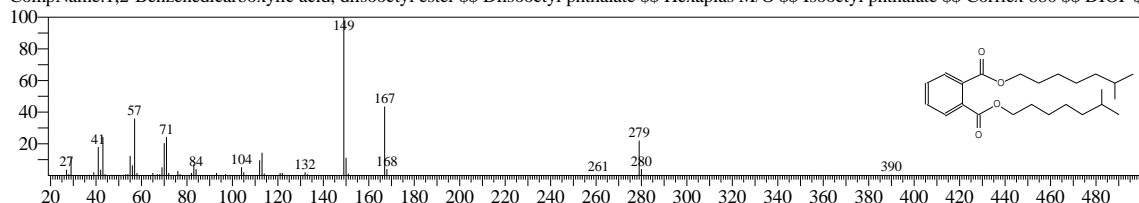

Hit#:2 Entry:164411 Library:NIST08.LIB

SI:94 Formula:C<sub>24</sub>H<sub>38</sub>O<sub>4</sub> CAS:117-81-7 MolWeight:390 RetIndex:2704

CompName:Bis(2-ethylhexyl) phthalate \$\$ 1,2-Benzenedicarboxylic acid, bis(2-ethylhexyl) ester \$\$ Phthalic acid, bis(2-ethylhexyl) ester \$\$ Bis(2-ethylhexyl) phthalate

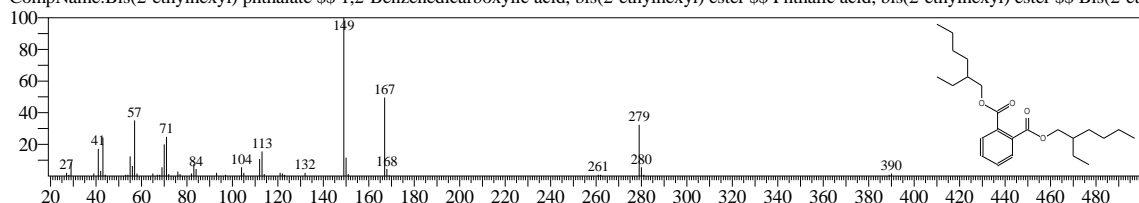

Hit#:3 Entry:96163 Library:NIST08.LIB

SI:93 Formula:C<sub>16</sub>H<sub>22</sub>O<sub>4</sub> CAS:4376-20-9 MolWeight:278 RetIndex:2162

CompName:1,2-Benzenedicarboxylic acid, mono(2-ethylhexyl) ester \$\$ Mono(2-ethylhexyl) phthalate \$\$ Phthalic acid, mono-(2-ethylhexyl) ester \$\$

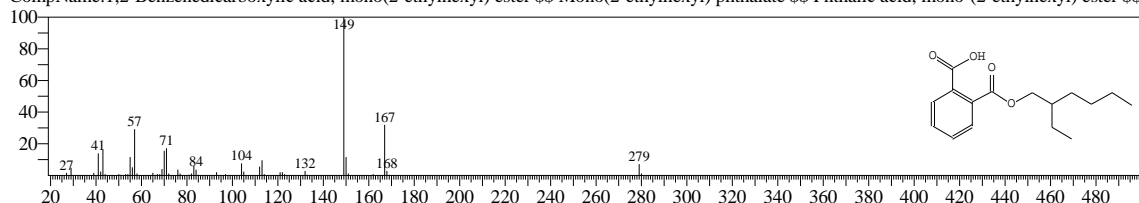

Hit#:4 Entry:27128 Library:NIST08s.LIB

SI:91 Formula:C<sub>24</sub>H<sub>38</sub>O<sub>4</sub> CAS:117-84-0 MolWeight:390 RetIndex:2832

CompName:Di-n-octyl phthalate \$\$ 1,2-Benzenedicarboxylic acid, dioctyl ester \$\$ Phthalic acid, dioctyl ester \$\$ n-Octyl phthalate \$\$ Dinopol NOP \$

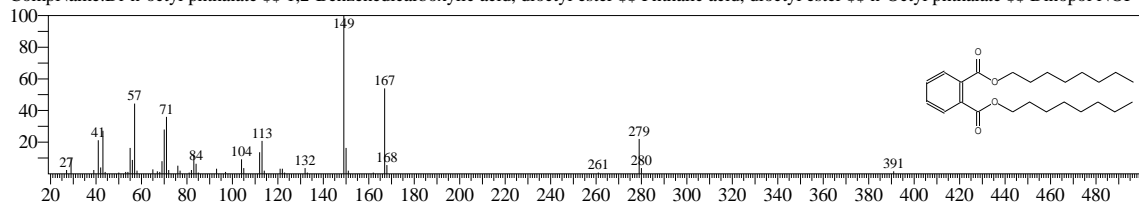

Hit#:5 Entry:172832 Library:NIST08.LIB

SI:86 Formula:C<sub>26</sub>H<sub>42</sub>O<sub>4</sub> CAS:0-00-0 MolWeight:418 RetIndex:2838

CompName:Phthalic acid, 6-ethyloct-3-yl 2-ethylhexyl ester

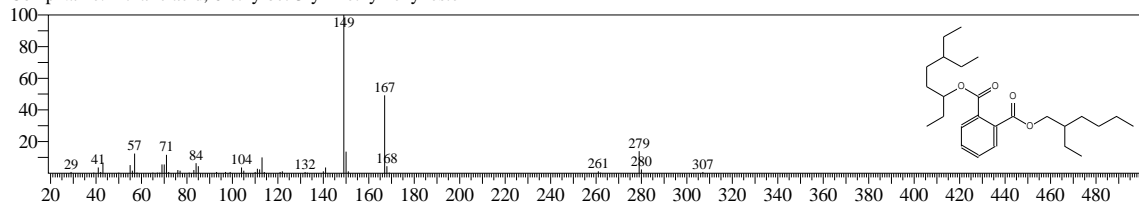

<< Target >>

Line#:23 R.Time:64.600(Scan#:12221) MassPeaks:327

RawMode:Averaged 64.595-64.605(12220-12222) BasePeak:69.05(35059)

BG Mode:Calc. from Peak Group 1 - Event 1

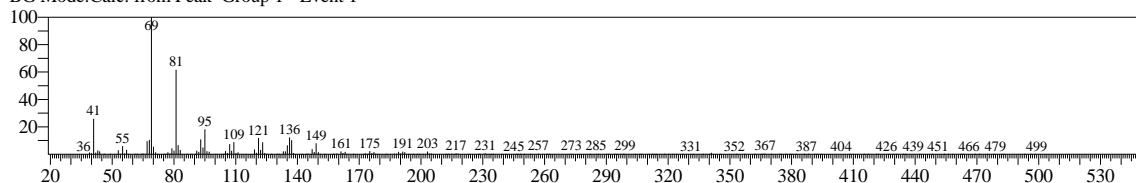

Hit#:1 Entry:170748 Library:NIST08.LIB

SI:97 Formula:C<sub>30</sub>H<sub>50</sub> CAS:111-02-4 MolWeight:410 RetIndex:2914

CompName:2,6,10,14,18,22-Tetracosahexaene, 2,6,10,15,19,23-hexamethyl-, (all-E)- \$\$ All-trans-Squalene \$\$ trans-Squalene \$\$ Spinacen \$\$ Spinac

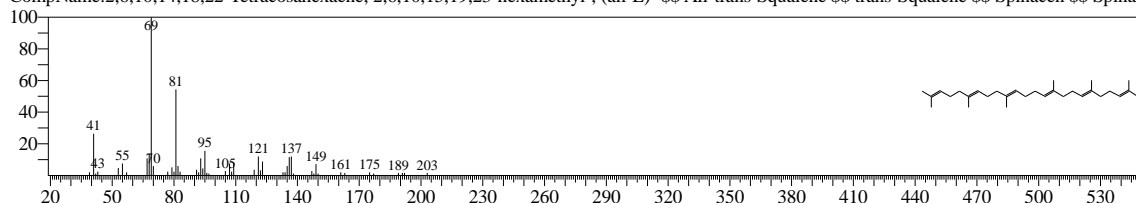

Hit#:2 Entry:27421 Library:NIST08s.LIB

SI:96 Formula:C<sub>30</sub>H<sub>50</sub> CAS:7683-64-9 MolWeight:410 RetIndex:2914

CompName:Squalene \$\$ 2,6,10,14,18,22-Tetracosahexaene, 2,6,10,15,19,23-hexamethyl- \$\$ Skvalen \$\$ Spinacene \$\$ Supraene \$\$ (6E,10E,14E,18E

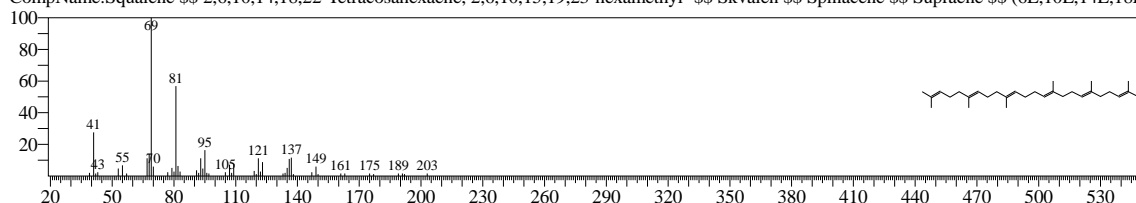

Hit#:3 Entry:28128 Library:NIST08s.LIB

SI:92 Formula:C<sub>40</sub>H<sub>66</sub> CAS:502-62-5 MolWeight:546 RetIndex:3878

CompName:psi.,psi.-Carotene, 7,7',8,8',11,11',12,12',15,15'-decahydro- \$\$ 2,6,10,14,18,22,26,30-Dotriacontaoctene, 2,6,10,14,19,23,27,31-octamer

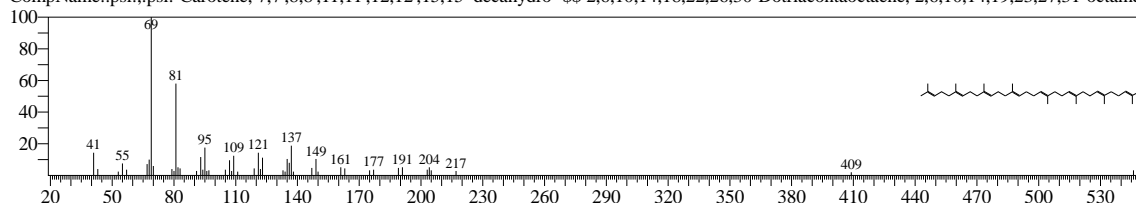

Hit#:4 Entry:140611 Library:NIST08.LIB

SI:91 Formula:C<sub>25</sub>H<sub>42</sub> CAS:75581-03-2 MolWeight:342 RetIndex:2432

CompName:2,6,10,14,18-Pentamethyl-2,6,10,14,18-eicosapentaene \$\$ (6E,10E,14E,18E)-2,6,10,14,18-Pentamethyl-2,6,10,14,18-icosapentaene # \$\$

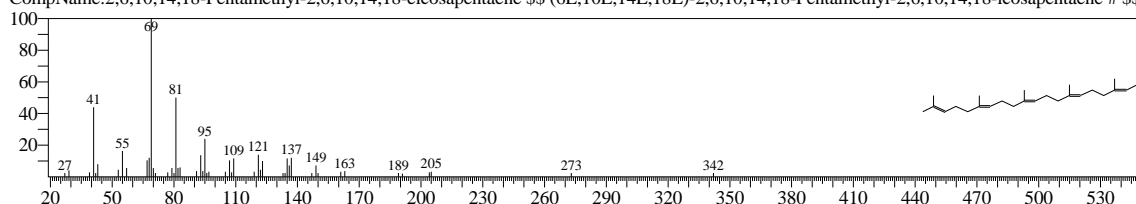

Hit#:5 Entry:23916 Library:NIST08s.LIB

SI:90 Formula:C<sub>20</sub>H<sub>34</sub>O CAS:7614-21-3 MolWeight:290 RetIndex:2192

CompName:Hexadeca-2,6,10,14-tetraen-1-ol, 3,7,11,16-tetramethyl-, (E,E,E)- \$\$ (2Z,6E,10E)-3,7,11,15-Tetramethyl-2,6,10,14-hexadecatetraen-1-ol

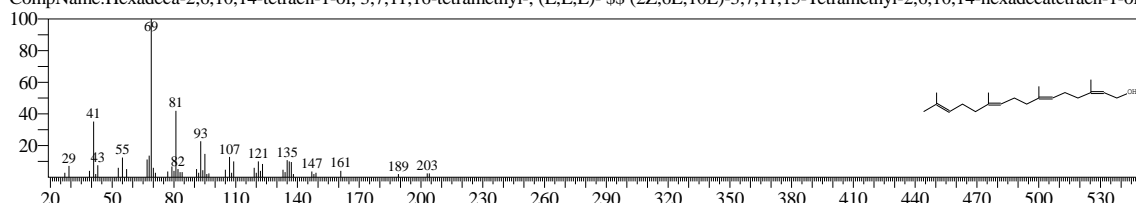

<< Target >>

Line#:24 R.Time:68.430(Scan#:12987) MassPeaks:294

RawMode:Averaged 68.425-68.435(12986-12988) BasePeak:99.10(3548)

BG Mode:Calc. from Peak Group 1 - Event 1

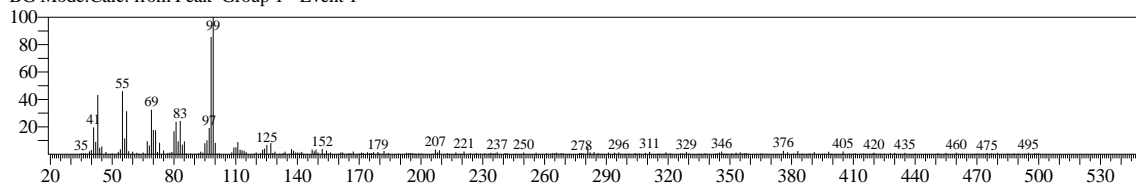

Hit#:1 Entry:99205 Library:NIST08.LIB

SI:81 Formula:C<sub>18</sub>H<sub>34</sub>O<sub>2</sub> CAS:1227-51-6 MolWeight:282 RetIndex:2199

CompName:2H-Pyran-2-one, tetrahydro-6-tridecyl- \$\$ Octadecanoic acid, 5-hydroxy-, .delta.-lactone \$\$ 6-Tridecyltetrahydro-2H-pyran-2-one # \$\$

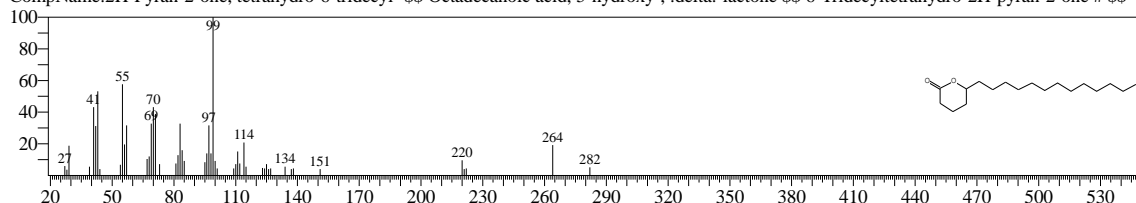

Hit#:2 Entry:67643 Library:NIST08.LIB

SI:81 Formula:C<sub>11</sub>H<sub>24</sub>FO<sub>2</sub>P CAS:211192-71-1 MolWeight:238 RetIndex:0

CompName:Methylphosphonic acid, fluoroanhydride, 1-methylnonyl ester \$\$ 2-Decyl methylphosphonofluoridate \$\$ 1-Methylnonyl methylphosphor

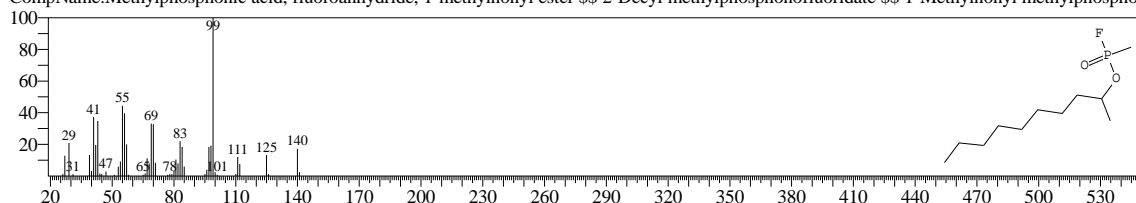

Hit#:3 Entry:69022 Library:NIST08.LIB

SI:80 Formula:C<sub>11</sub>H<sub>22</sub>B<sub>2</sub>O<sub>4</sub> CAS:74810-64-3 MolWeight:240 RetIndex:0

CompName:1,3,2-Dioxaborolane, 4,4'-(1,3-propanediyl)bis[2-ethyl- \$\$ 1,3,2-Dioxaborolane, 4,4'-(1,3-propanediyl)bis\*2-ethyl- \$\$ 2-Ethyl-4-[3-(2-ethyl

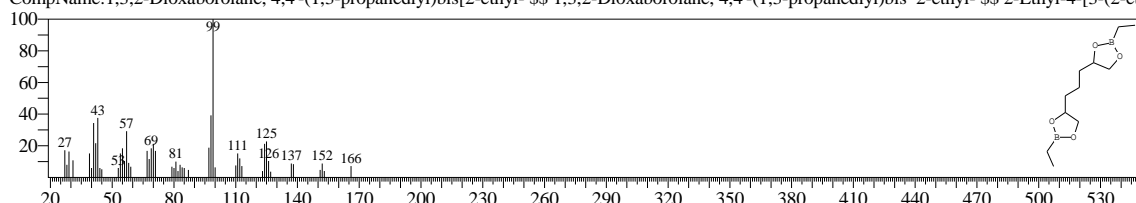

Hit#:4 Entry:187248 Library:NIST08.LIB

SI:80 Formula:C<sub>32</sub>H<sub>67</sub>O<sub>4</sub>P CAS:2197-63-9 MolWeight:546 RetIndex:0

CompName:Dihexadecyl phosphate \$\$ Dihexadecyl hydrogen phosphate \$\$ Dicetyl phosphate \$\$ 1-Hexadecanol, hydrogen phosphate \$\$ Dicetyl hyc

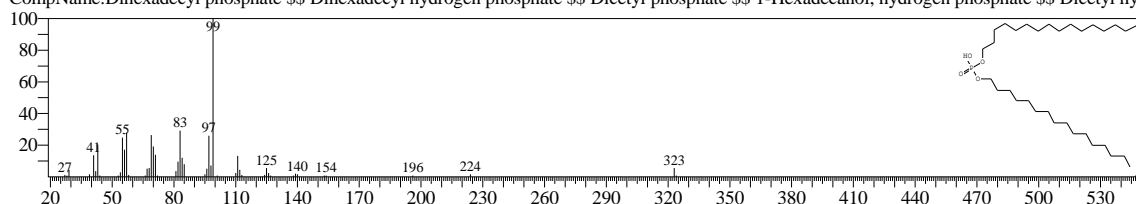

Hit#:5 Entry:67644 Library:NIST08.LIB

SI:80 Formula:C<sub>11</sub>H<sub>24</sub>FO<sub>2</sub>P CAS:345260-82-4 MolWeight:238 RetIndex:0

CompName:3,7-Dimethyl-1-octyl methylphosphonofluoridate \$\$ Methylphosphonic acid, fluoroanhydride, 3,7-dimethyloctyl ester \$\$ 3,7-Dimethylc

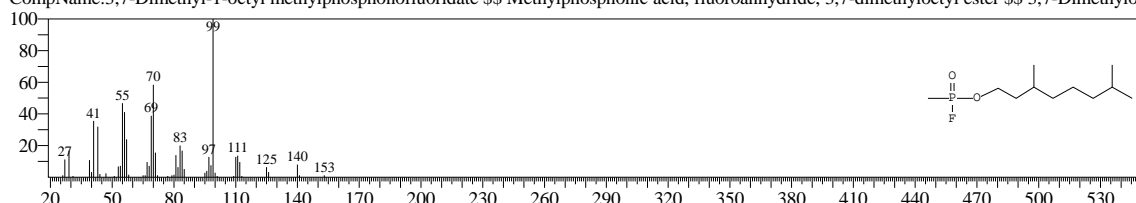

<< Target >>

Line#:25 R.Time:70.390(Scan#:13379) MassPeaks:249

RawMode:Averaged 70.385-70.395(13378-13380) BasePeak:57.05(1571)

BG Mode:Calc. from Peak Group 1 - Event 1

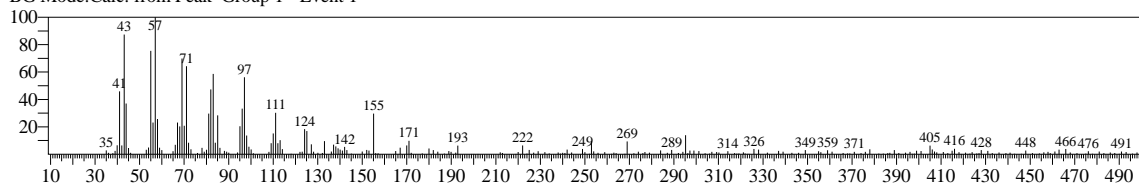

Hit#:1 Entry:188819 Library:NIST08.LIB

SI:85 Formula:C41H84O CAS:40710-42-7 MolWeight:592 RetIndex:4339

CompName:1-Hentetracontanol

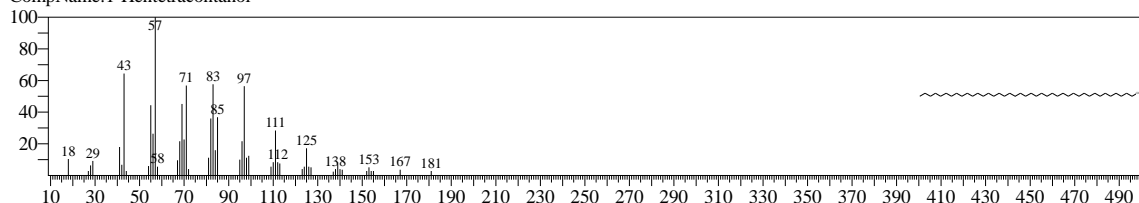

Hit#:2 Entry:26597 Library:NIST08.LIB

SI:85 Formula:C26H52 CAS:6703-81-7 MolWeight:364 RetIndex:2585

CompName:Heneicosane, 11-cyclopentyl- \$\$ Cyclopentane, (1-decylundecyl)- \$\$ 11-Cyclopentylheneicosane \$\$ (1-Decylundecyl)cyclopentane # \$\$

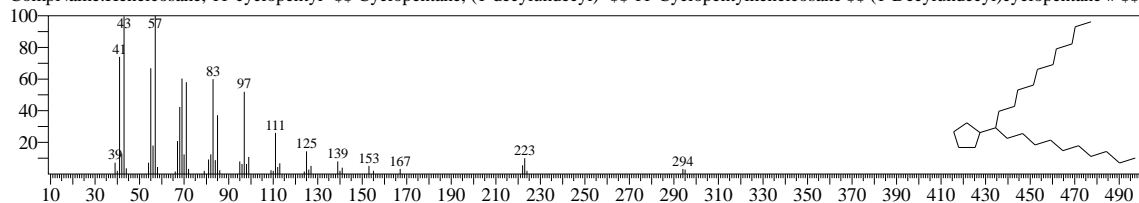

Hit#:3 Entry:89233 Library:NIST08.LIB

SI:85 Formula:C18H36O CAS:822-28-6 MolWeight:268 RetIndex:1876

CompName:Hexadecane, 1-(ethenyloxy)- \$\$ Ether, hexadecyl vinyl \$\$ Cetyl vinyl ether \$\$ Vinyl cetyl ether \$\$ Hexadecyl vinyl ether \$\$ 1-(Hexadecyloxy)cyclopentane

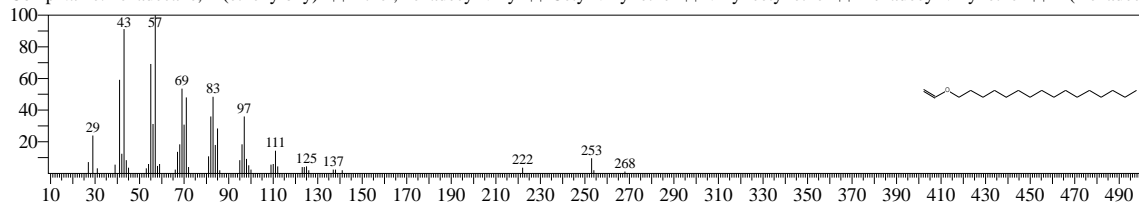

Hit#:4 Entry:170725 Library:NIST08.LIB

SI:85 Formula:C28H58O CAS:0-00-0 MolWeight:410 RetIndex:3047

CompName:1-Octacosanol

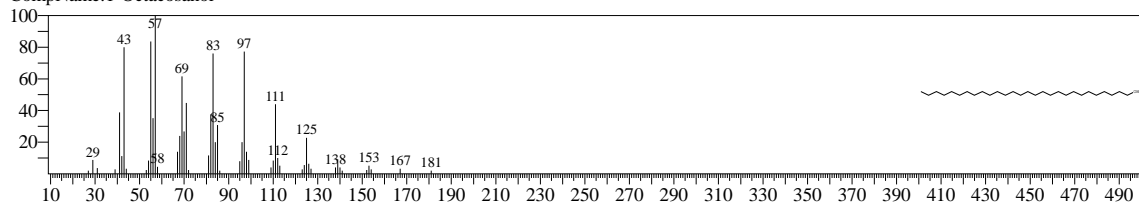

Hit#:5 Entry:179175 Library:NIST08.LIB

SI:84 Formula:C21H35F7O2 CAS:0-00-0 MolWeight:452 RetIndex:1833

CompName:Heptadecyl heptafluorobutyrate

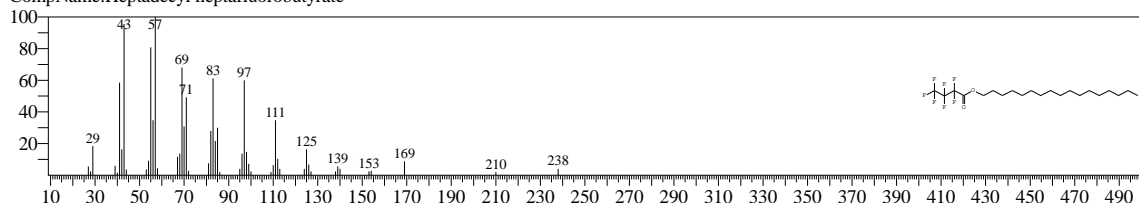

<< Target >>

Line#:26 R.Time:70.775(Scan#:13456) MassPeaks:334  
RawMode:Averaged 70.770-70.780(13455-13457) BasePeak:83.05(4128)  
BG Mode:Calc. from Peak Group 1 - Event 1

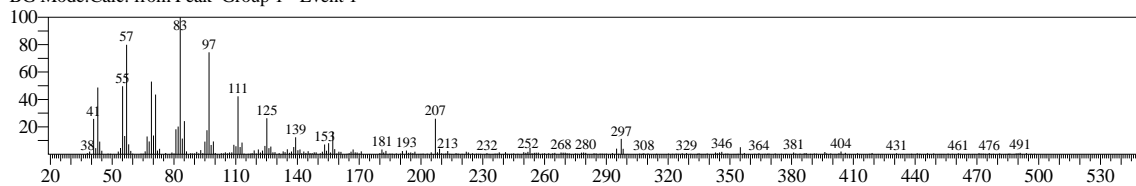

Hit#:1 Entry:184619 Library:NIST08.LIB  
SI:86 Formula:C27H49F5O2 CAS:0-00-0 MolWeight:500 RetIndex:2568  
CompName:Tetracosyl pentafluoropropionate

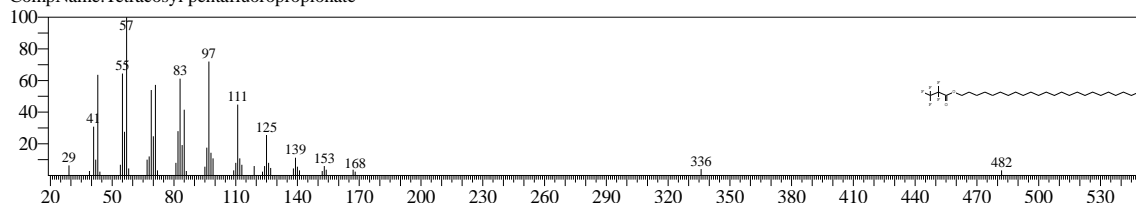

Hit#:2 Entry:188608 Library:NIST08.LIB  
SI:86 Formula:C33H61F5O2 CAS:0-00-0 MolWeight:584 RetIndex:3164  
CompName:Triacontyl pentafluoropropionate

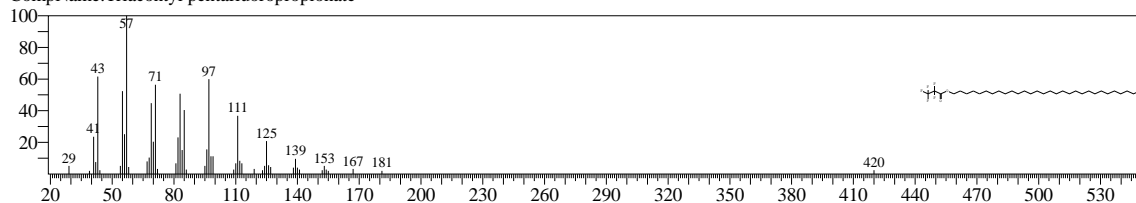

Hit#:3 Entry:170725 Library:NIST08.LIB  
SI:86 Formula:C28H58O CAS:0-00-0 MolWeight:410 RetIndex:3047  
CompName:1-Octacosanol

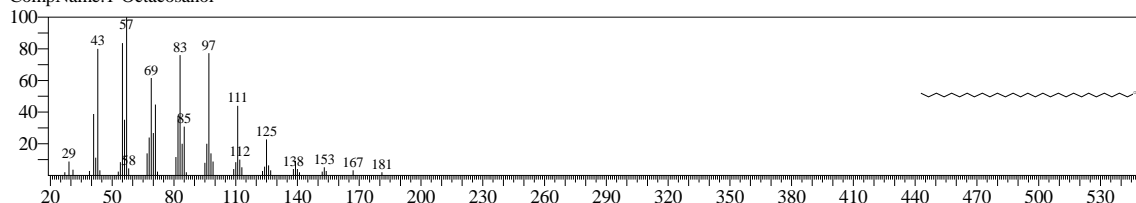

Hit#:4 Entry:189139 Library:NIST08.LIB  
SI:86 Formula:C32H57F7O2 CAS:0-00-0 MolWeight:606 RetIndex:2926  
CompName:Octacosyl heptafluorobutyrate

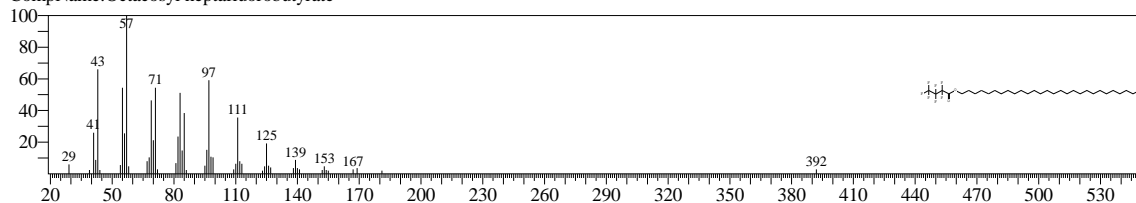

Hit#:5 Entry:187906 Library:NIST08.LIB  
SI:86 Formula:C34H65F3O2 CAS:0-00-0 MolWeight:562 RetIndex:3402  
CompName:Dotriacontyl trifluoroacetate

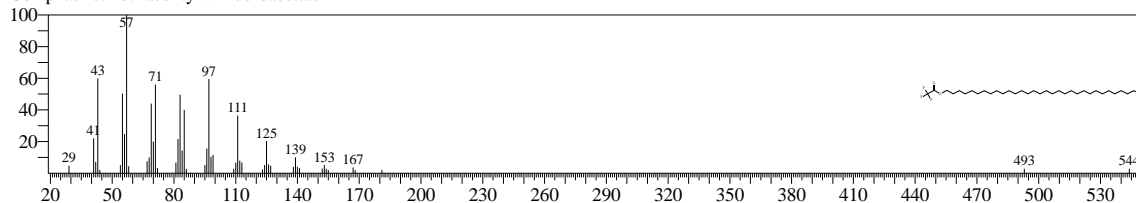

<< Target >>

Line#:27 R.Time:71.610(Scan#:13623) MassPeaks:283

RawMode:Averaged 71.605-71.615(13622-13624) BasePeak:165.10(6459)

BG Mode:Calc. from Peak Group 1 - Event 1

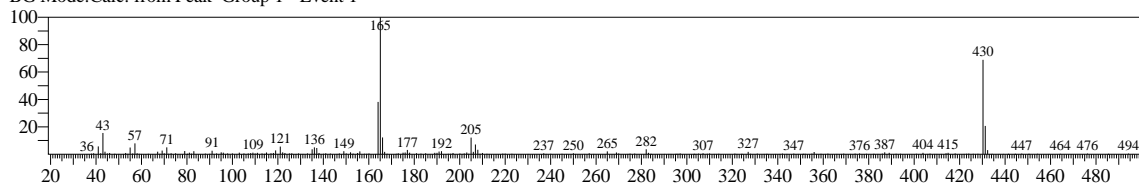

Hit#:1 Entry:27664 Library:NIST08s.LIB

SI:89 Formula:C<sub>29</sub>H<sub>50</sub>O<sub>2</sub> CAS:59-02-9 MolWeight:430 RetIndex:3149

CompName:Vitamin E \$\$ 2H-1-Benzopyran-6-ol, 3,4-dihydro-2,5,7,8-tetramethyl-2-(4,8,12-trimethyltridecyl)-, [2R-[2R\*(4R\*,8R\*)]]- \$.alpha.-Toc

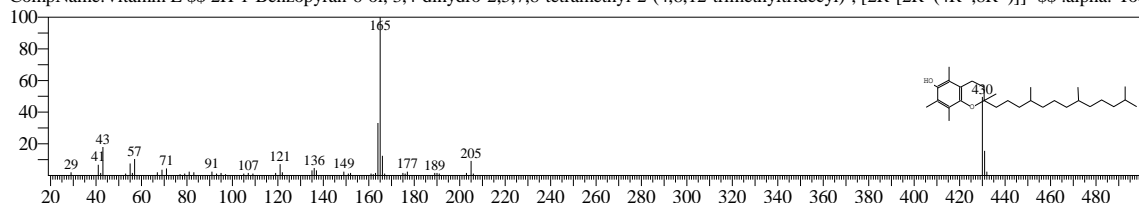

Hit#:2 Entry:188803 Library:NIST08.LIB

SI:89 Formula:C<sub>35</sub>H<sub>60</sub>O<sub>7</sub> CAS:0-00-0 MolWeight:592 RetIndex:4489

CompName:.alpha.-Tocopherol-.beta.-D-mannoside

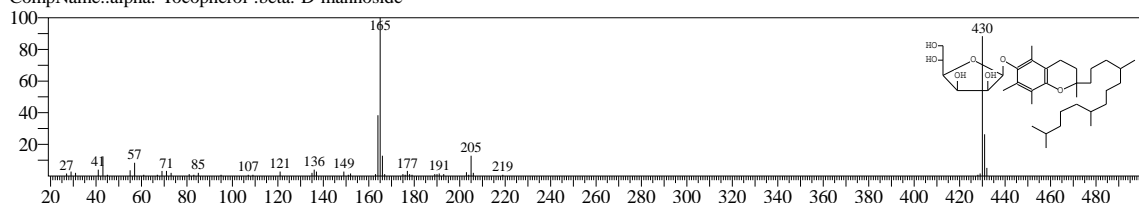

Hit#:3 Entry:27663 Library:NIST08s.LIB

SI:88 Formula:C<sub>29</sub>H<sub>50</sub>O<sub>2</sub> CAS:10191-41-0 MolWeight:430 RetIndex:3149

CompName:dl-.alpha.-Tocopherol \$\$ (.+/-)-.alpha.-Tocopherol \$\$ Vitamin E \$\$ 2H-1-Benzopyran-6-ol, 3,4-dihydro-2,5,7,8-tetramethyl-2-(4,8,12-tri

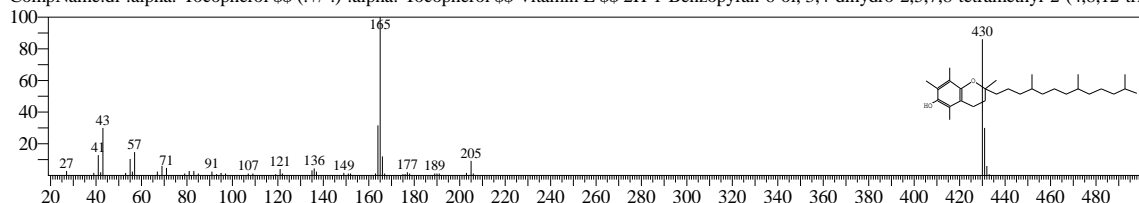

Hit#:4 Entry:181985 Library:NIST08.LIB

SI:87 Formula:C<sub>31</sub>H<sub>52</sub>O<sub>3</sub> CAS:58-95-7 MolWeight:472 RetIndex:3308

CompName:2H-1-Benzopyran-6-ol, 3,4-dihydro-2,5,7,8-tetramethyl-2-(4,8,12-trimethyltridecyl)-, acetate, [2R-[2R\*(4R\*,8R\*)]]- \$\$ Vitamin E acetat

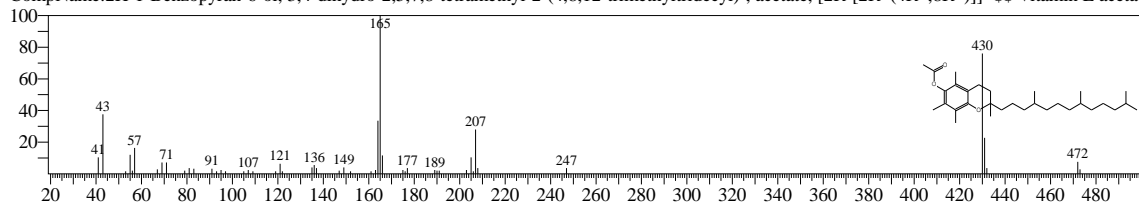

Hit#:5 Entry:27909 Library:NIST08s.LIB

SI:84 Formula:C<sub>31</sub>H<sub>52</sub>O<sub>3</sub> CAS:7695-91-2 MolWeight:472 RetIndex:3308

CompName:(+)-.alpha.-Tocopherol acetate \$\$ 2H-1-Benzopyran-6-ol, 3,4-dihydro-2,5,7,8-tetramethyl-2-(4,8,12-trimethyltridecyl)-, acetate \$\$ Vitami

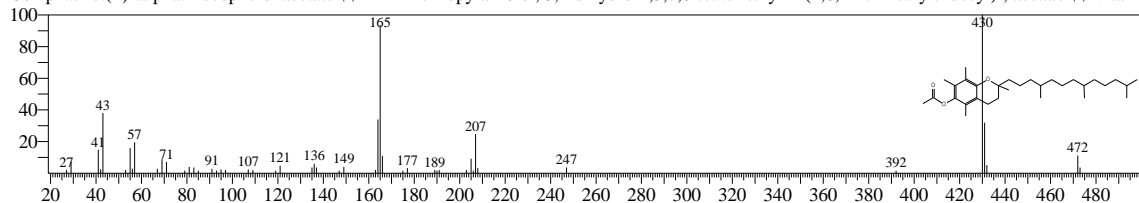

<< Target >>

Line#:28 R.Time:74.685(Scan#:14238) MassPeaks:311

RawMode:Averaged 74.680-74.690(14237-14239) BasePeak:57.05(21086)

BG Mode:Calc. from Peak Group 1 - Event 1

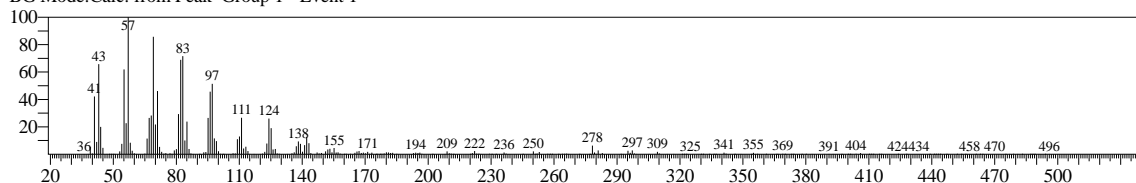

Hit#:1 Entry:186507 Library:NIST08.LIB

SI:89 Formula:C38H74 CAS:0-00-0 MolWeight:530 RetIndex:3779

CompName:1,37-Octatriacontadiene

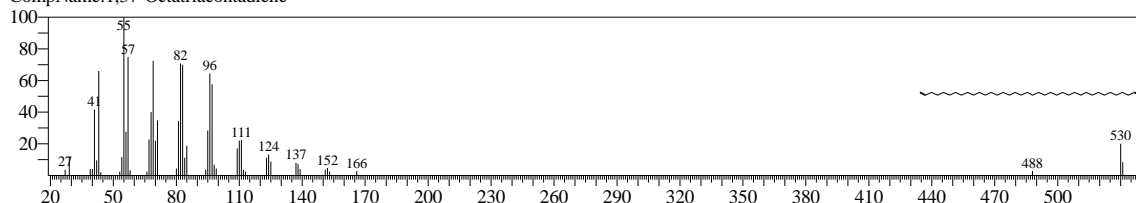

Hit#:2 Entry:22614 Library:NIST08s.LIB

SI:89 Formula:C18H36O CAS:638-66-4 MolWeight:268 RetIndex:1999

CompName:Octadecanal \$\$ Stearaldehyde \$\$ Octadecyl aldehyde \$\$ Stearyl aldehyde \$\$ n-Octadecanal \$\$

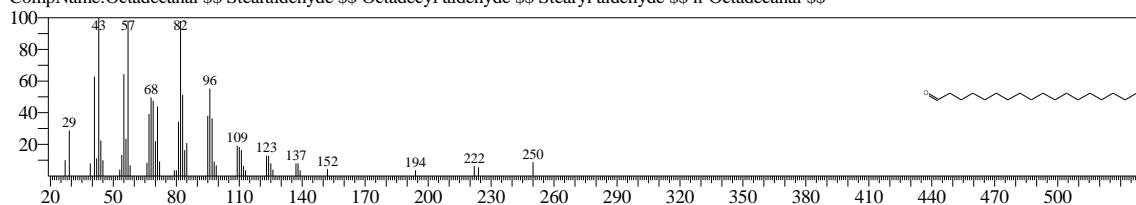

Hit#:3 Entry:179650 Library:NIST08.LIB

SI:89 Formula:C30H62O2 CAS:36645-68-8 MolWeight:454 RetIndex:3489

CompName:1,30-Triacontanediol

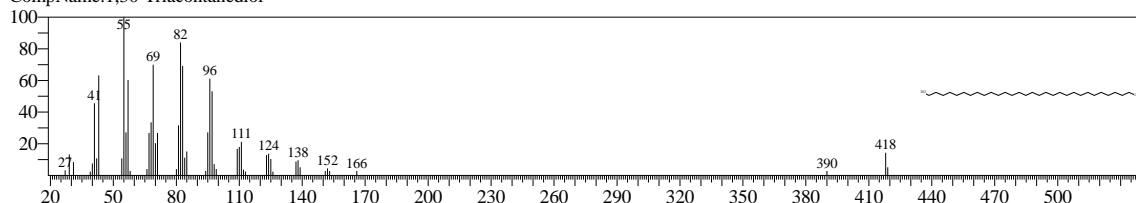

Hit#:4 Entry:99256 Library:NIST08.LIB

SI:89 Formula:C19H38O CAS:57457-72-4 MolWeight:282 RetIndex:1898

CompName:Oxirane, 2-decyl-3-(5-methylhexyl)-, cis-(+/-)- \$\$ 2-Decyl-3-(5-methylhexyl)oxirane # \$\$

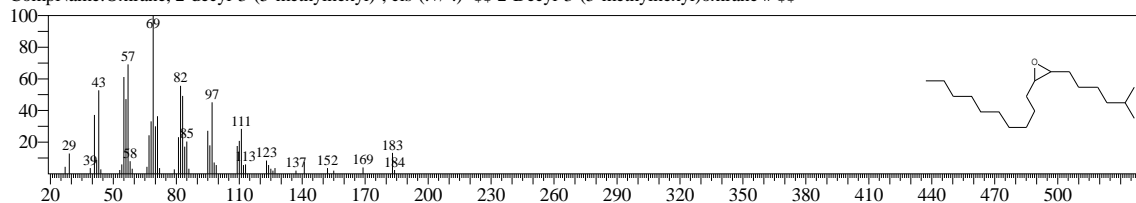

Hit#:5 Entry:170725 Library:NIST08.LIB

SI:88 Formula:C28H58O CAS:0-00-0 MolWeight:410 RetIndex:3047

CompName:1-Octacosanol

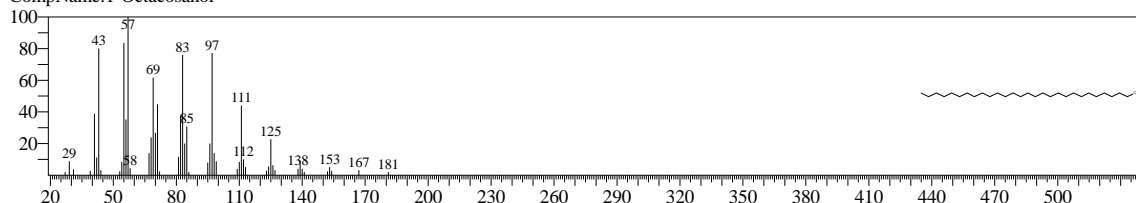

<< Target >>

Line#:29 R.Time:74.990(Scan#:14299) MassPeaks:268

RawMode:Averaged 74.985-74.995(14298-14300) BasePeak:97.10(5983)

BG Mode:Calc. from Peak Group 1 - Event 1

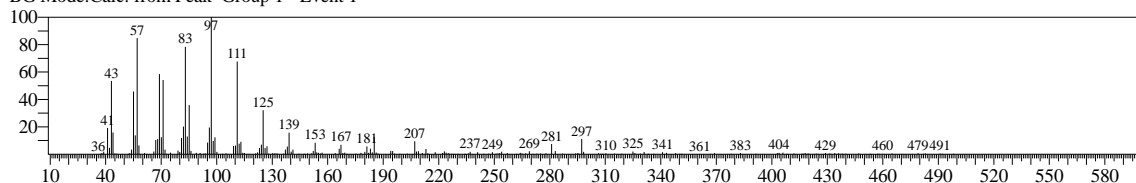

Hit#:1 Entry:189901 Library:NIST08.LIB

SI:89 Formula:C40H77F3O2 CAS:0-00-0 MolWeight:646 RetIndex:3999

CompName:Octatriacontyl trifluoroacetate

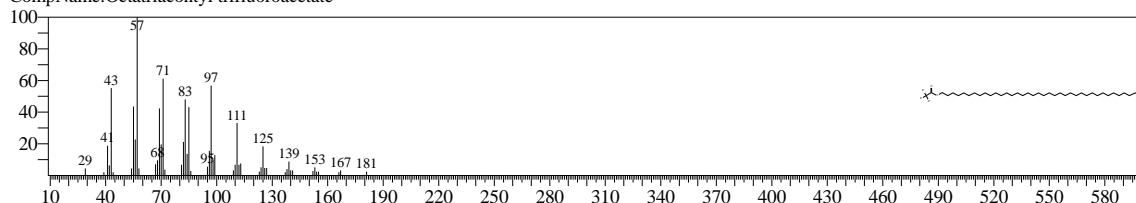

Hit#:2 Entry:188819 Library:NIST08.LIB

SI:89 Formula:C41H84O CAS:40710-42-7 MolWeight:592 RetIndex:4339

CompName:1-Hentetracontanol

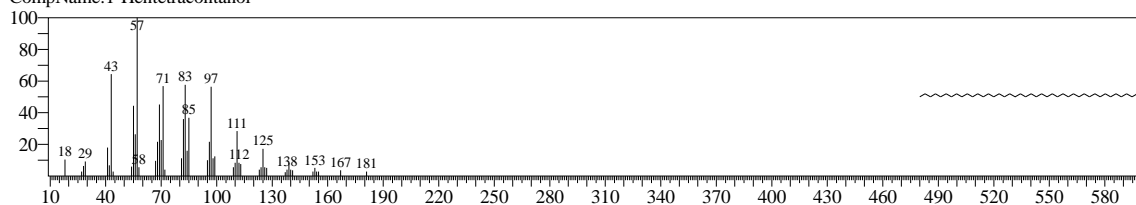

Hit#:3 Entry:188797 Library:NIST08.LIB

SI:89 Formula:C31H55F7O2 CAS:0-00-0 MolWeight:592 RetIndex:2827

CompName:Heptacosyl heptafluorobutyrate

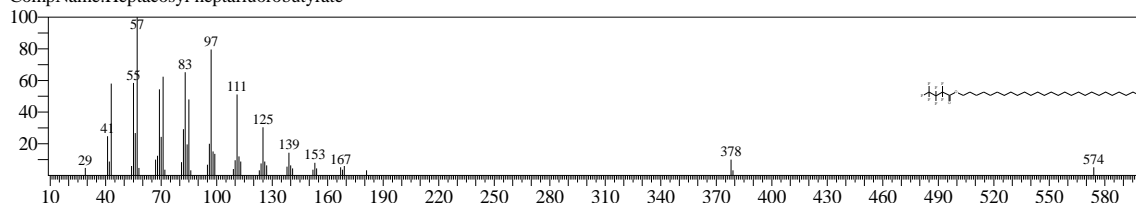

Hit#:4 Entry:189401 Library:NIST08.LIB

SI:89 Formula:C38H73F3O2 CAS:0-00-0 MolWeight:618 RetIndex:3800

CompName:Hexatriacontyl trifluoroacetate

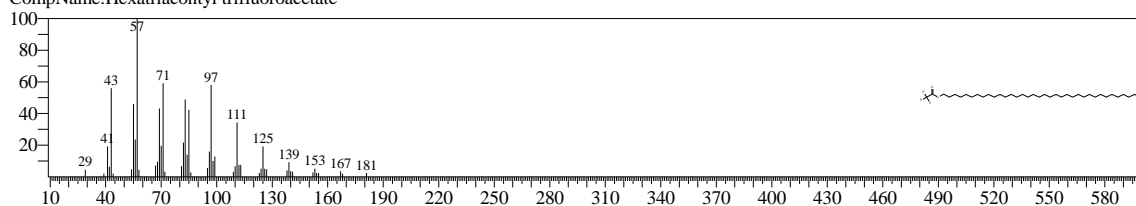

Hit#:5 Entry:186694 Library:NIST08.LIB

SI:89 Formula:C32H61F3O2 CAS:0-00-0 MolWeight:534 RetIndex:3204

CompName:Triacontyl trifluoroacetate

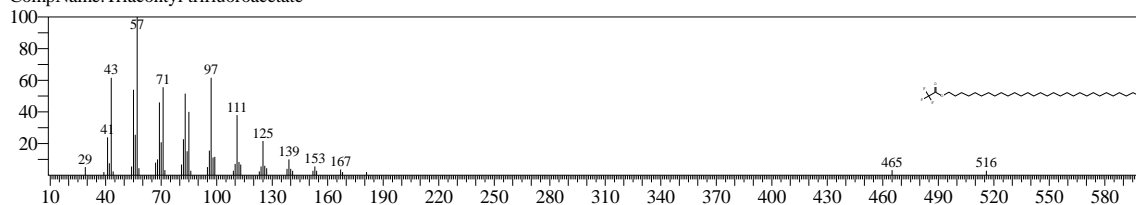

<< Target >>

Line#:30 R.Time:75.595(Scan#:14420) MassPeaks:353

RawMode:Averaged 75.590-75.600(14419-14421) BasePeak:43.05(7615)

BG Mode:Calc. from Peak Group 1 - Event 1

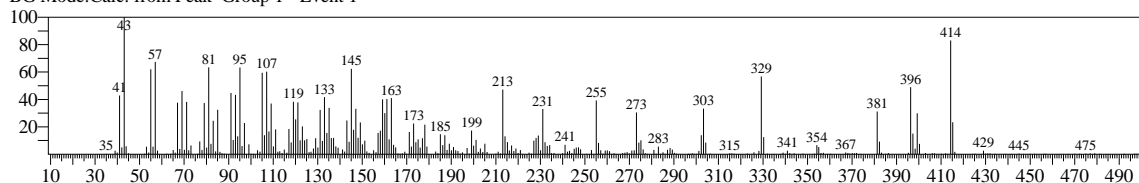

Hit#:1 Entry:171855 Library:NIST08.LIB

SI:86 Formula:C<sub>29</sub>H<sub>50</sub>O CAS:83-47-6 MolWeight:414 RetIndex:2731

CompName:gamma-Sitosterol \$\$ Stigmaster-5-en-3-ol, (3.beta.,24S)- \$\$ Stigmaster-5-en-3.beta.-ol, (24S)- \$\$ Clonasterol \$\$ Fucosterol, .beta.-dihydro

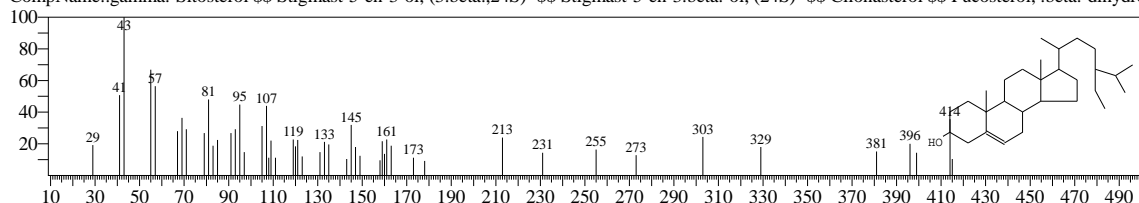

Hit#:2 Entry:27488 Library:NIST08s.LIB

SI:81 Formula:C<sub>29</sub>H<sub>50</sub>O CAS:83-46-5 MolWeight:414 RetIndex:2731

CompName:beta-Sitosterol \$\$ Stigmaster-5-en-3-ol, (3.beta.)- \$\$ Stigmaster-5-en-3.beta.-ol \$\$ .alpha.-Dihydrofucosterol \$\$ .beta.-Sitosterin \$\$ Angelic

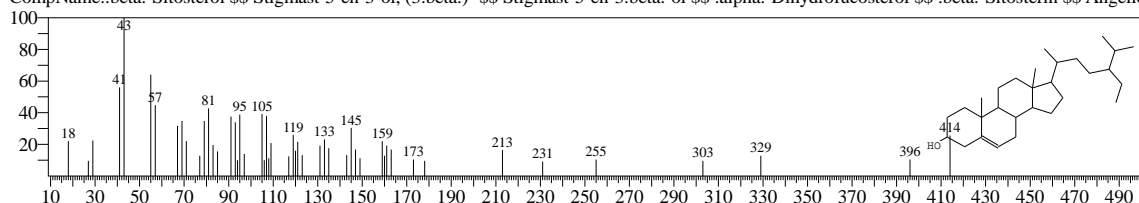

Hit#:3 Entry:27029 Library:NIST08s.LIB

SI:78 Formula:C<sub>27</sub>H<sub>46</sub>O CAS:57-88-5 MolWeight:386 RetIndex:2596

CompName:Cholesterol \$\$ Cholest-5-en-3-ol (3.beta.)- \$\$ (-)-Cholesterol \$\$ Cholest-5-en-3.beta.-ol \$\$ Cholesterin \$\$ Cholesterol base H \$\$ Choles

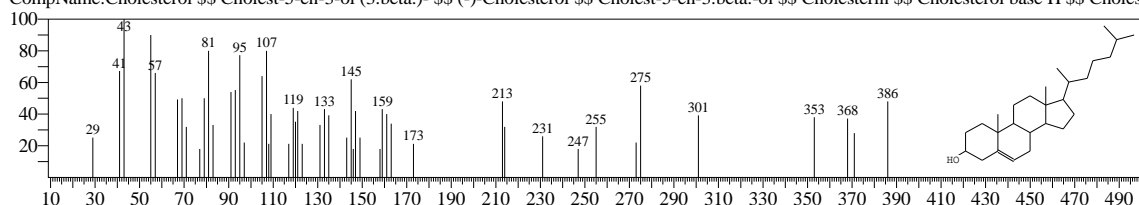

Hit#:4 Entry:27306 Library:NIST08s.LIB

SI:76 Formula:C<sub>28</sub>H<sub>48</sub>O CAS:1174-92-1 MolWeight:400 RetIndex:2545

CompName:Cholest-5-ene, 3-methoxy-, (3.beta.)- \$\$ Cholest-5-ene, 3.beta.-methoxy- \$\$ Cholesterin methyl ether \$\$ Cholesterol methyl ether \$\$ Ch

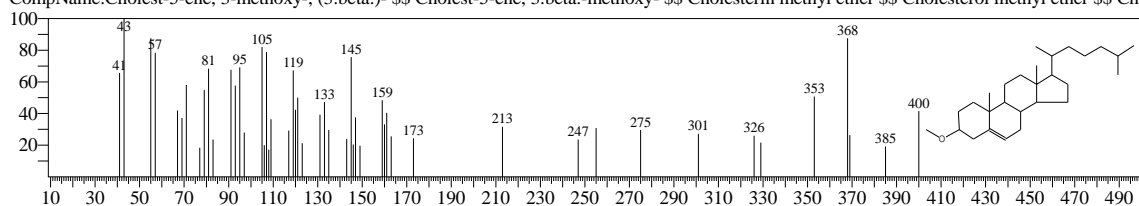

Hit#:5 Entry:168088 Library:NIST08.LIB

SI:76 Formula:C<sub>28</sub>H<sub>48</sub>O CAS:4651-51-8 MolWeight:400 RetIndex:2632

CompName:Ergost-5-en-3-ol, (3.beta.)- \$\$ Ergost-5-en-3.beta.-ol \$\$ .delta.22-Dihydrobrassicasterol \$\$ .delta.5-Ergosterol \$\$ Dihydrobrassicasterol

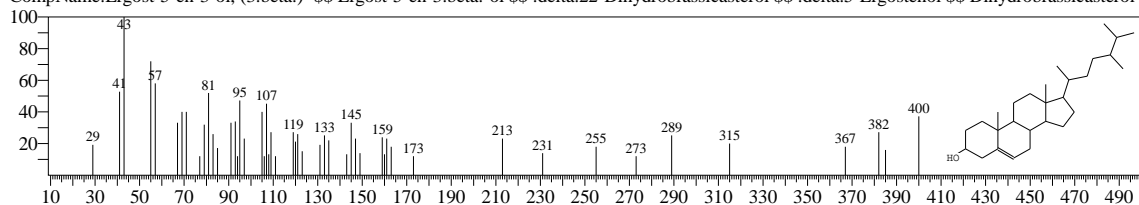

<< Target >>

Line#:31 R.Time:76.215(Scan#:14544) MassPeaks:340

RawMode:Averaged 76.210-76.220(14543-14545) BasePeak:95.05(5286)

BG Mode:Calc. from Peak Group 1 - Event 1

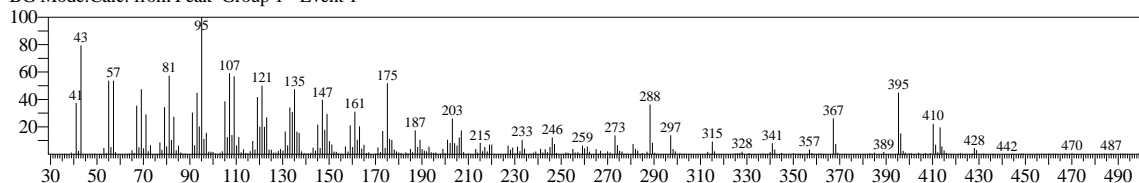

Hit#:1 Entry:183300 Library:NIST08.LIB

SI:83 Formula:C32H52O3 CAS:83110-15-0 MolWeight:484 RetIndex:3043

CompName:9,19-Cyclo-27-norlanostan-25-one, 3-(acetyloxy)-24-methyl-, (3.beta.,24R)- \$1-(1,4-Dimethyl-5-oxohexyl)-3a,6,6,12a-tetramethyltetra-

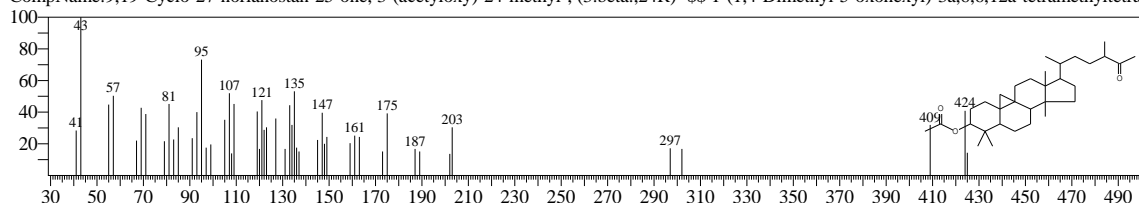

Hit#:2 Entry:178124 Library:NIST08.LIB

SI:82 Formula:C30H52O2 CAS:26525-84-8 MolWeight:444 RetIndex:2923

CompName:9,19-Cyclo-9.beta.-lanostane-3.beta.,25-diol \$Cycloartane-3.beta.,25-diol \$1-(5-Hydroxy-1,5-dimethylhexyl)-3a,6,6,12a-tetramethyltetra-

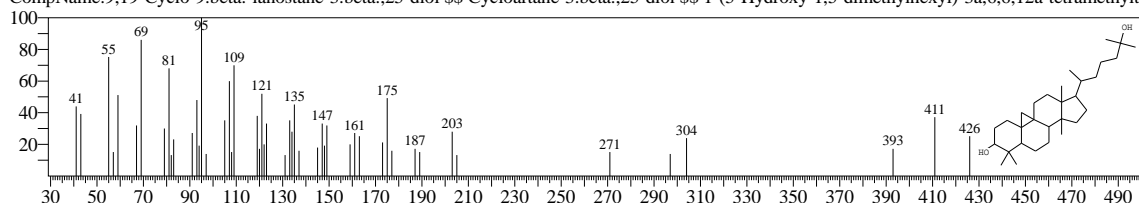

Hit#:3 Entry:168099 Library:NIST08.LIB

SI:82 Formula:C28H48O CAS:1912-66-9 MolWeight:400 RetIndex:2633

CompName:9,19-Cyclocholestan-3-ol, 14-methyl-, (3.beta.,5.alpha.)- \$9,19-Cyclo-5.alpha.,9.beta.-cholestan-3.beta.-ol, 14-methyl- \$Pollinastanol

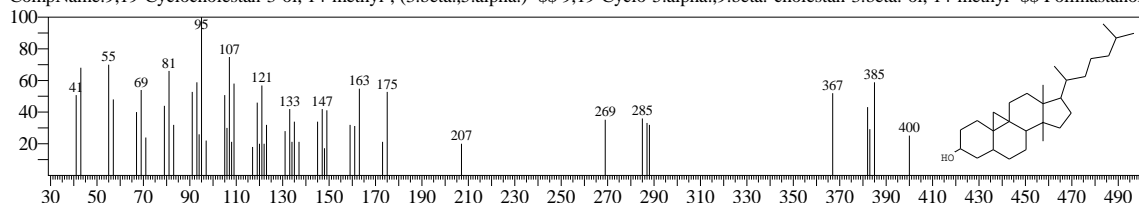

Hit#:4 Entry:177403 Library:NIST08.LIB

SI:81 Formula:C31H52O CAS:1449-09-8 MolWeight:440 RetIndex:2834

CompName:9,19-Cyclo-25-en-3-ol, 24-methylene-, (3.beta.)- \$9,19-Cyclo-9.beta.-lanostan-3.beta.-ol, 24-methylene- \$24-Methylenecycloartano-

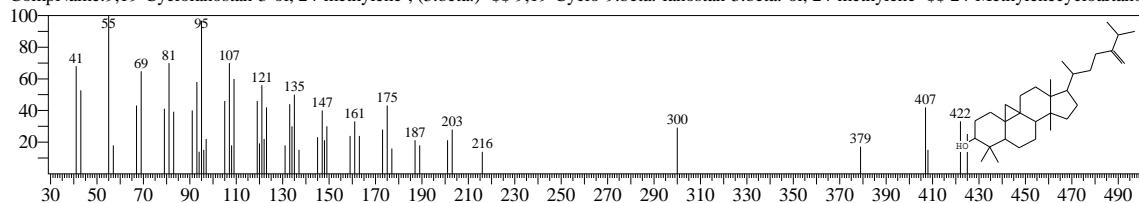

Hit#:5 Entry:177404 Library:NIST08.LIB

SI:81 Formula:C31H52O CAS:511-61-5 MolWeight:440 RetIndex:2834

CompName:9,19-Cyclo-25-en-3-ol, 24-methyl-, (3.beta.,24S)- \$9,19-Cyclo-9.beta.-lanost-25-en-3.beta.-ol, 24-methyl-, (24S)- \$Cyclolauder

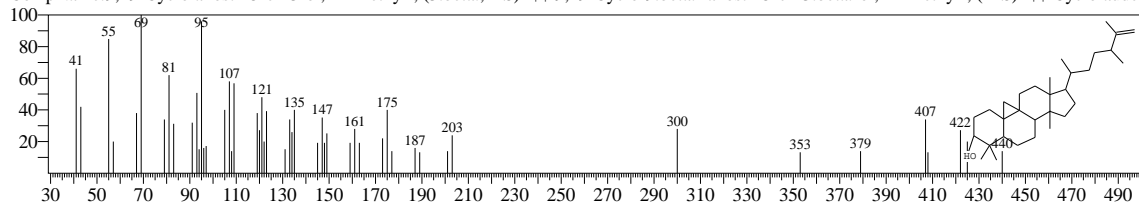

<< Target >>

Line#:32 R.Time:77.155(Scan#:14732) MassPeaks:365

RawMode:Averaged 77.150-77.160(14731-14733) BasePeak:69.05(18735)

BG Mode:Calc. from Peak Group 1 - Event 1

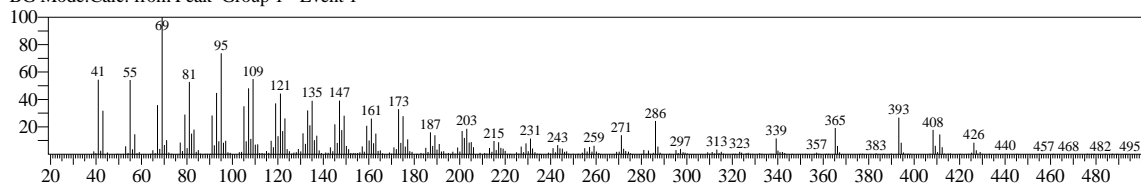

Hit#:1 Entry:174622 Library:NIST08.LIB

SI:94 Formula:C30H50O CAS:469-38-5 MolWeight:426 RetIndex:2816

CompName:9,19-Cyclolanost-24-en-3-ol, (3.beta.)- \$\$ 9,19-Cyclo-9.beta.-lanost-24-en-3.beta.-ol \$\$ Cycloartenol \$\$ Handianol \$\$ 1-(1,5-Dimethyl-4

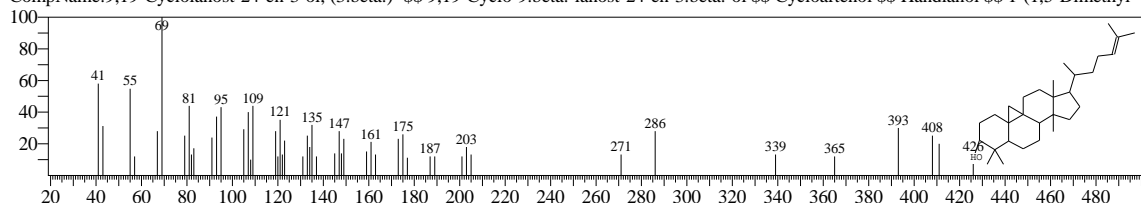

Hit#:2 Entry:178124 Library:NIST08.LIB

SI:86 Formula:C30H52O2 CAS:26525-84-8 MolWeight:444 RetIndex:2923

CompName:9,19-Cyclo-9.beta.-lanostane-3.beta.,25-diol \$\$ Cycloartane-3.beta.,25-diol \$\$ 1-(5-Hydroxy-1,5-dimethylhexyl)-3a,6,6,12a-tetramethyltr

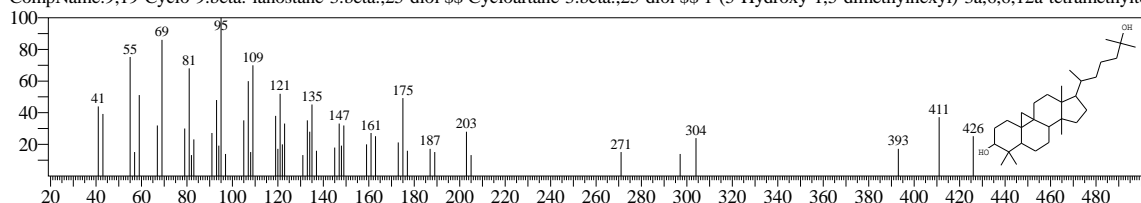

Hit#:3 Entry:177404 Library:NIST08.LIB

SI:84 Formula:C31H52O CAS:511-61-5 MolWeight:440 RetIndex:2834

CompName:9,19-Cyclolanost-25-en-3-ol, 24-methyl-, (3.beta.,24S)- \$\$ 9,19-Cyclo-9.beta.-lanost-25-en-3.beta.-ol, 24-methyl-, (24S)- \$\$ Cyclolaure

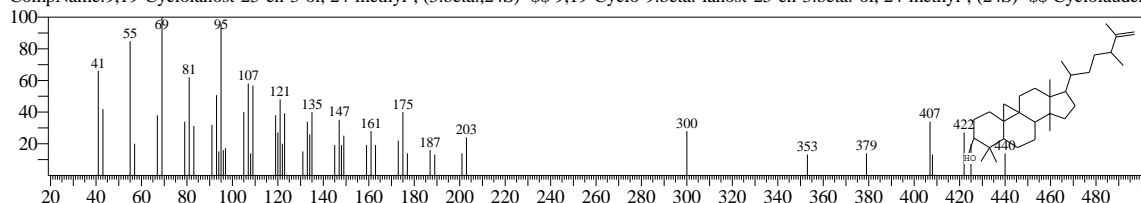

Hit#:4 Entry:177403 Library:NIST08.LIB

SI:82 Formula:C31H52O CAS:1449-09-8 MolWeight:440 RetIndex:2834

CompName:9,19-Cyclolanostan-3-ol, 24-methylene-, (3.beta.)- \$\$ 9,19-Cyclo-9.beta.-lanostan-3.beta.-ol, 24-methylene- \$\$ 24-Methylenecycloartano

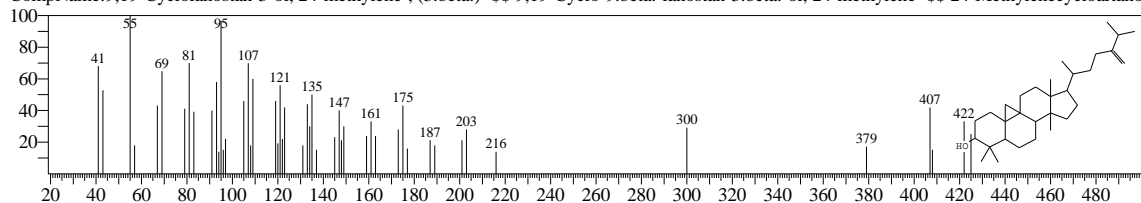

Hit#:5 Entry:181511 Library:NIST08.LIB

SI:82 Formula:C32H52O2 CAS:10376-42-8 MolWeight:468 RetIndex:2900

CompName:9,19-Cycloergost-24(28)-en-3-ol, 4,14-dimethyl-, acetate, (3.beta.,4.alpha.,5.alpha.)- \$\$ 9,19-Cycloergost-24(28)-en-3-ol, 4,14-dimethyl-,

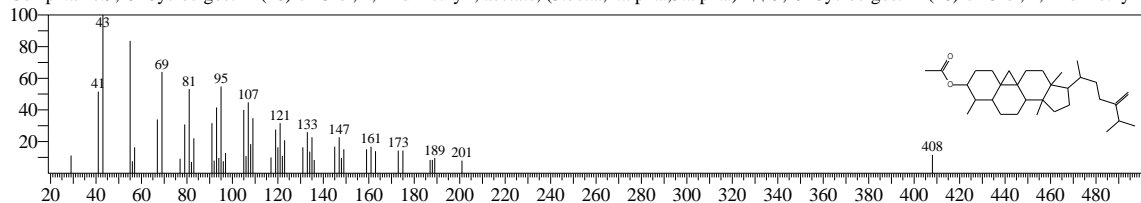

<< Target >>

Line#:33 R.Time:78.380(Scan#:14977) MassPeaks:373

RawMode:Averaged 78.375-78.385(14976-14978) BasePeak:124.10(27395)

BG Mode:Calc. from Peak Group 1 - Event 1

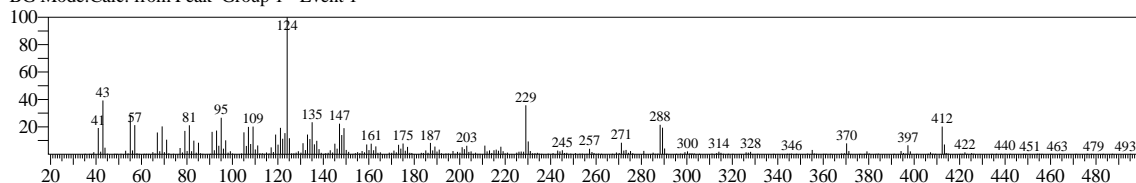

Hit#:1 Entry:171279 Library:NIST08.LIB

SI:89 Formula:C<sub>29</sub>H<sub>48</sub>O CAS:1058-61-3 MolWeight:412 RetIndex:2714

CompName:Stigmast-4-en-3-one \$\$ 4-Stigmasten-3-one \$\$ Sitostenone \$\$ .DELTA.4-Sitosterol-3-one \$\$

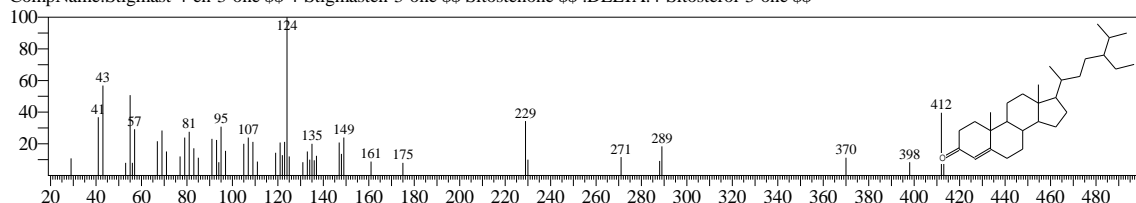

Hit#:2 Entry:162012 Library:NIST08.LIB

SI:86 Formula:C<sub>27</sub>H<sub>44</sub>O CAS:601-57-0 MolWeight:384 RetIndex:2580

CompName:Cholest-4-en-3-one \$\$ 3-Oxocholest-4-ene \$\$ 4-Cholesten-3-one \$\$ Cholestenone \$\$ .delta.4-Cholesten-3-one \$\$ .delta.4-Cholesten-3-one

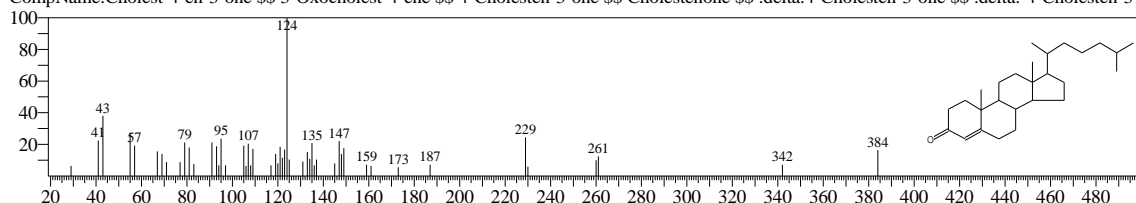

Hit#:3 Entry:122195 Library:NIST08.LIB

SI:77 Formula:C<sub>21</sub>H<sub>30</sub>O<sub>2</sub> CAS:3795-19-5 MolWeight:314 RetIndex:2247

CompName:Pregn-4-ene-3,20-dione, (8.alpha.,10.alpha.)- \$\$ 8.alpha.,10.alpha.-Pregn-4-ene-3,20-dione \$\$ 8.alpha.,10.alpha.-Progesterone \$\$ Pregn-4-ene-3,20-dione

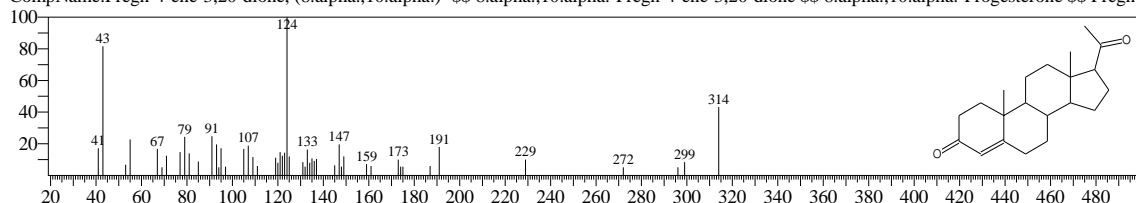

Hit#:4 Entry:179947 Library:NIST08.LIB

SI:77 Formula:C<sub>30</sub>H<sub>48</sub>O<sub>3</sub> CAS:5949-44-0 MolWeight:456 RetIndex:3173

CompName:Androst-4-en-3-one, 17-[(1-oxoundecyl)oxy]-, (17.beta.)- \$\$ Testosterone, undecanoate \$\$ 5-.alpha.-Androstan-3-one, 17-.beta.-hydroxy-

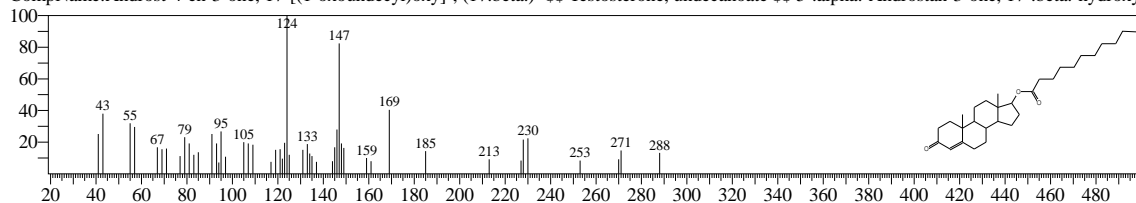

Hit#:5 Entry:177771 Library:NIST08.LIB

SI:77 Formula:C<sub>29</sub>H<sub>46</sub>O<sub>3</sub> CAS:5721-91-5 MolWeight:442 RetIndex:3074

CompName:Testosterone Decanoate \$\$ Test Decanoate \$\$ Androst-4-en-3-one, 17-[(1-oxodecyl)oxy]-, (17.beta.)- \$\$

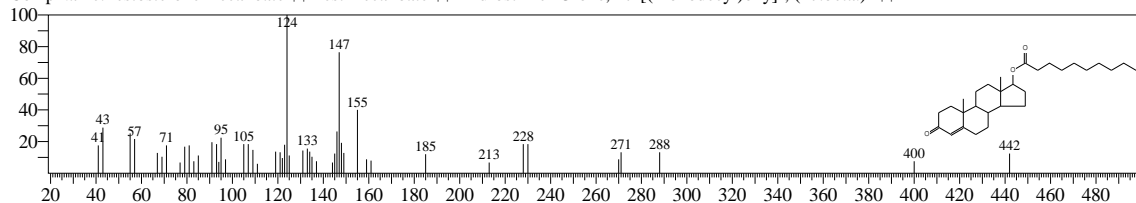

<< Target >>

Line#:34 R.Time:78.955(Scan#:15092) MassPeaks:340

RawMode:Averaged 78.950-78.960(15091-15093) BasePeak:97.10(11073)

BG Mode:Calc. from Peak Group 1 - Event 1

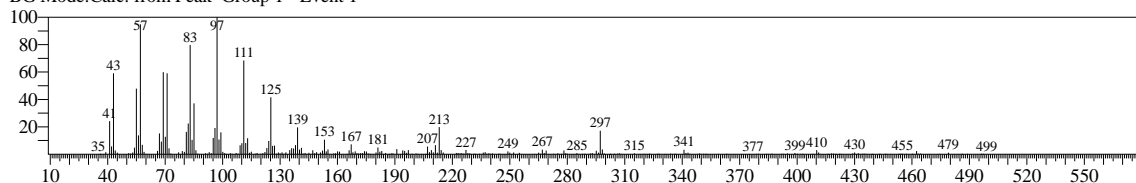

Hit#:1 Entry:188797 Library:NIST08.LIB

SI:90 Formula:C31H55F7O2 CAS:0-00-0 MolWeight:592 RetIndex:2827

CompName:Heptacosyl heptafluorobutyrate

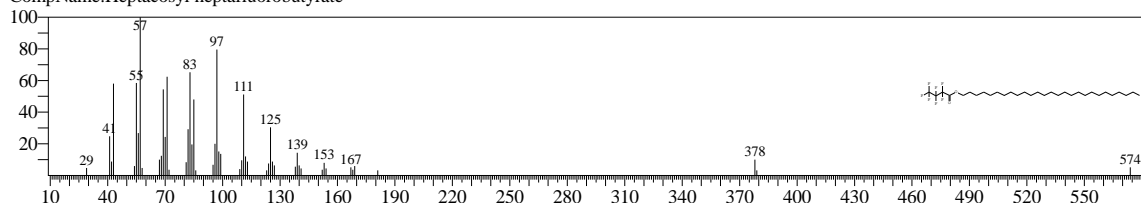

Hit#:2 Entry:187660 Library:NIST08.LIB

SI:89 Formula:C31H57F5O2 CAS:0-00-0 MolWeight:556 RetIndex:2965

CompName:Octacosyl pentafluoropropionate

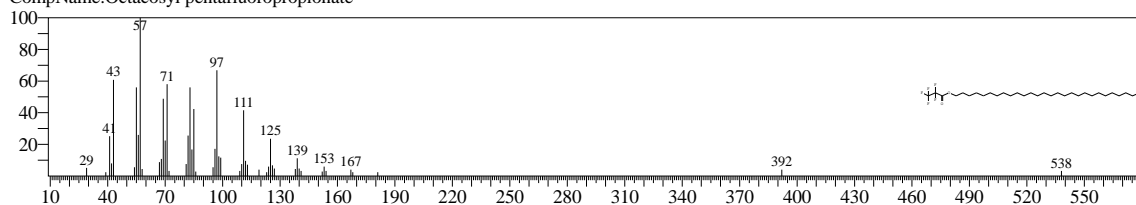

Hit#:3 Entry:188819 Library:NIST08.LIB

SI:89 Formula:C41H84O CAS:40710-42-7 MolWeight:592 RetIndex:4339

CompName:1-Hentetracontanol

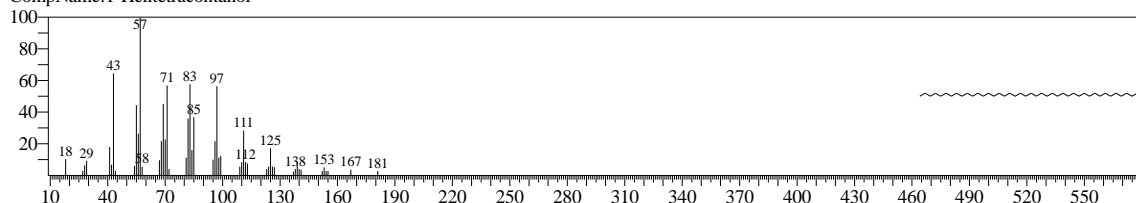

Hit#:4 Entry:189686 Library:NIST08.LIB

SI:89 Formula:C34H61F7O2 CAS:0-00-0 MolWeight:634 RetIndex:3125

CompName:Triacetyl heptafluorobutyrate

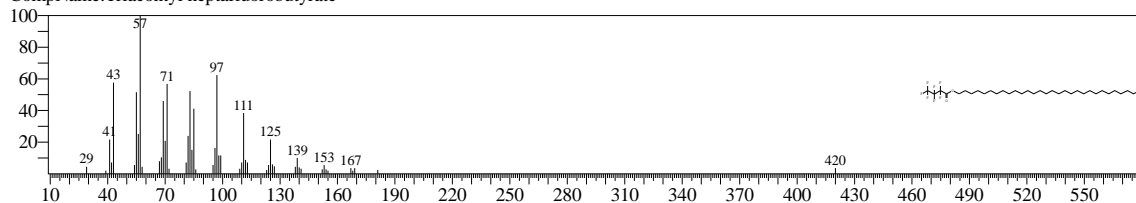

Hit#:5 Entry:166592 Library:NIST08.LIB

SI:89 Formula:C27H56O CAS:2004-39-9 MolWeight:396 RetIndex:2948

CompName:1-Heptacosanol \$ Heptacosan-1-ol \$ Heptacosanol \$

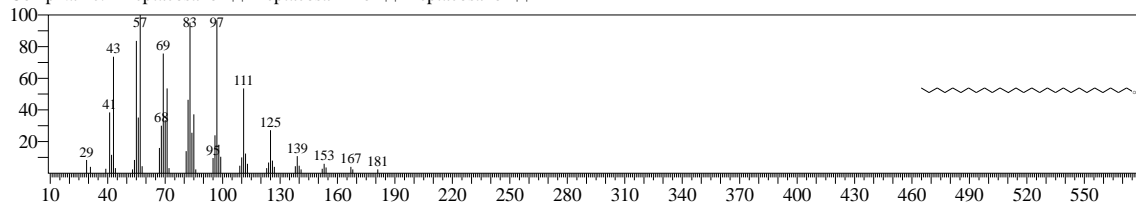

<< Target >>

Line#:35 R.Time:79.340(Scan#:15169) MassPeaks:271

RawMode:Averaged 79.335-79.345(15168-15170) BasePeak:207.00(2927)

BG Mode:Calc. from Peak Group 1 - Event 1

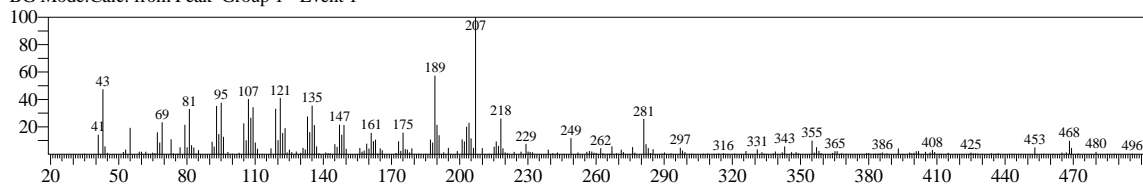

Hit#:1 Entry:181513 Library:NIST08.LIB

SI:76 Formula:C<sub>32</sub>H<sub>52</sub>O<sub>2</sub> CAS:1617-68-1 MolWeight:468 RetIndex:2987

CompName:Lup-20(29)-en-3-ol, acetate, (3.beta.)- \$\$ Lup-20(29)-en-3.beta.-ol, acetate \$\$ Lupenyl acetate \$\$ Lupeol acetate \$\$ Lupeyl acetate \$\$ 3-

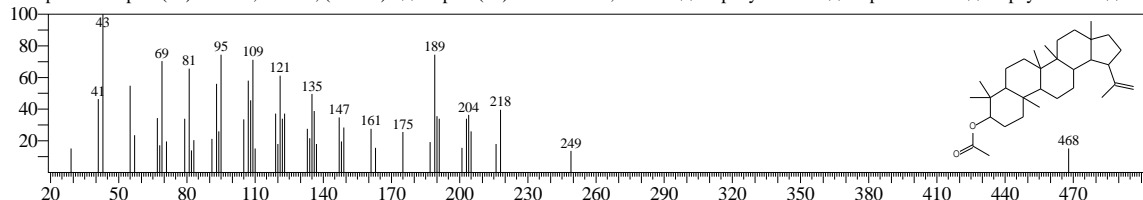

Hit#:2 Entry:181753 Library:NIST08.LIB

SI:74 Formula:C<sub>31</sub>H<sub>50</sub>O<sub>3</sub> CAS:0-00-0 MolWeight:470 RetIndex:2965

CompName:13,14-Epoxyursan-3-ol, acetate

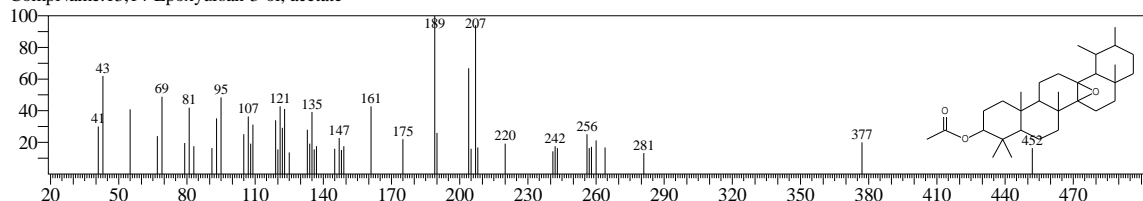

Hit#:3 Entry:179949 Library:NIST08.LIB

SI:73 Formula:C<sub>30</sub>H<sub>48</sub>O<sub>3</sub> CAS:472-15-1 MolWeight:456 RetIndex:3204

CompName:Lup-20(29)-en-28-oic acid, 3-hydroxy-, (3.beta.)- \$\$ Lup-20(29)-en-28-oic acid, 3.beta.-hydroxy- \$\$ Betulic acid \$\$ Betulinic acid \$\$ M

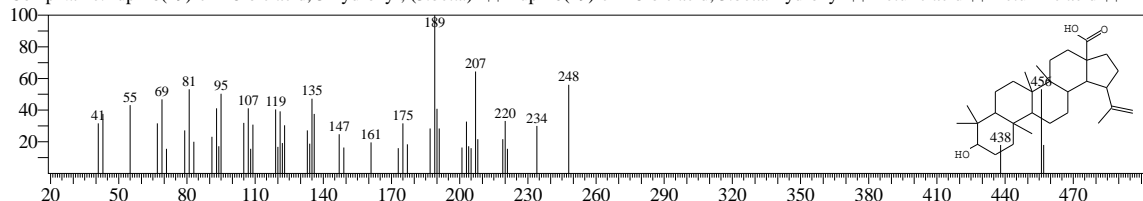

Hit#:4 Entry:27739 Library:NIST08s.LIB

SI:73 Formula:C<sub>30</sub>H<sub>50</sub>O<sub>2</sub> CAS:473-98-3 MolWeight:442 RetIndex:3090

CompName:Betulin \$\$ Lup-20(29)-ene-3,28-diol, (3.beta.)- \$\$ Lup-20(29)-ene-3.beta.,28-diol \$\$ Betuline \$\$ Betulinol \$\$ Betulol \$\$ Lup-20(30)-ene

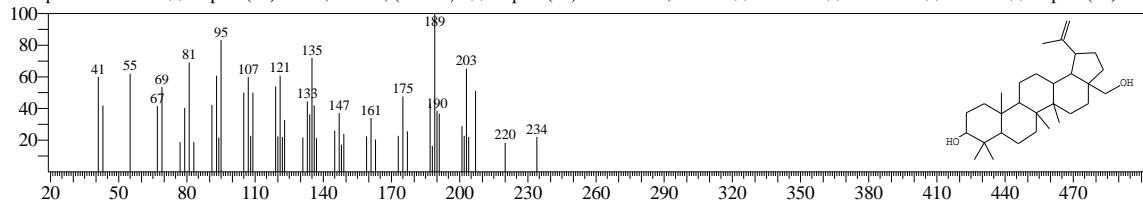

Hit#:5 Entry:57507 Library:NIST08.LIB

SI:73 Formula:C<sub>15</sub>H<sub>26</sub>O CAS:1460-73-7 MolWeight:222 RetIndex:1598

CompName:Agarospinol \$\$ Agarospinol \$\$ 2-(6,10-Dimethylspiro[4.5]dec-6-en-2-yl)-2-propanol # \$\$

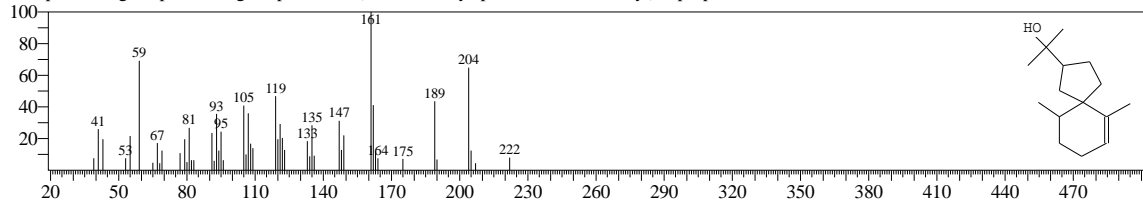

<< Target >>

Line#:36 R.Time:79.795(Scan#:15260) MassPeaks:371

RawMode:Averaged 79.790-79.800(15259-15261) BasePeak:43.05(3693)

BG Mode:Calc. from Peak Group 1 - Event 1

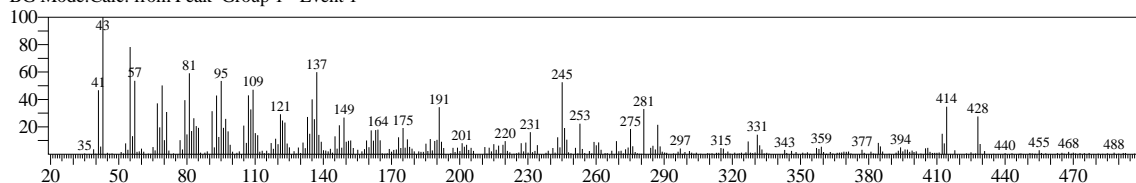

Hit#:1 Entry:175085 Library:NIST08.LIB

SI:79 Formula:C<sub>29</sub>H<sub>48</sub>O<sub>2</sub> CAS:22149-69-5 MolWeight:428 RetIndex:2875

CompName:Stigmastane-3,6-dione, (5.alpha.)- \$\$ 5.alpha.-Stigmastane-3,6-dione \$\$ Stigmastane-3,6-dione # \$\$

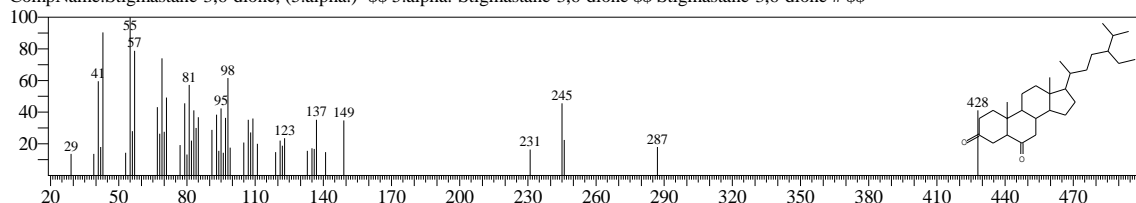

Hit#:2 Entry:171858 Library:NIST08.LIB

SI:77 Formula:C<sub>29</sub>H<sub>50</sub>O CAS:2097-85-0 MolWeight:414 RetIndex:2704

CompName:Cholestan-3-one, 4,4-dimethyl-, (5.alpha.)- \$\$ 5.alpha.-Cholestan-3-one, 4,4-dimethyl- \$\$ 4,4-Dimethyl-5.alpha.-cholestane-3-one \$\$ 4.

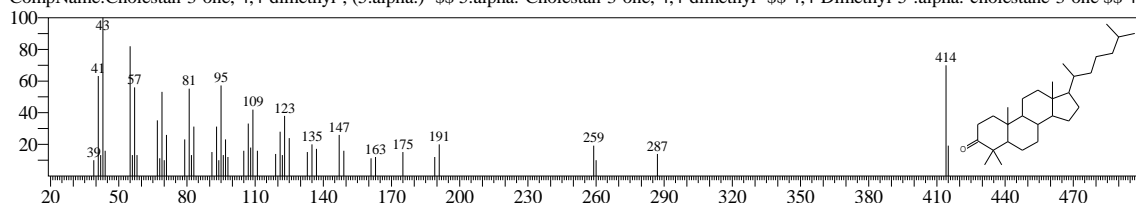

Hit#:3 Entry:116564 Library:NIST08.LIB

SI:76 Formula:C<sub>20</sub>H<sub>34</sub>O<sub>2</sub> CAS:7220-78-2 MolWeight:306 RetIndex:2400

CompName:4,8,13-Cyclotetradecatriene-1,3-diol, 1,5,9-trimethyl-12-(1-methylethyl)- \$\$ FW 306 \$\$ 4,8,13-Duvatriene-1,3-Diol \$\$ 12-Isopropyl-1,5,

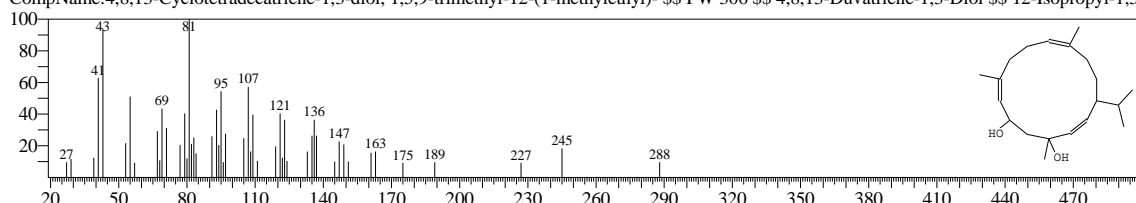

Hit#:4 Entry:186800 Library:NIST08.LIB

SI:74 Formula:C<sub>37</sub>H<sub>76</sub>O CAS:105794-58-9 MolWeight:536 RetIndex:3942

CompName:1-Heptatriacontanol \$\$ 1-Heptatriacontanol # \$\$

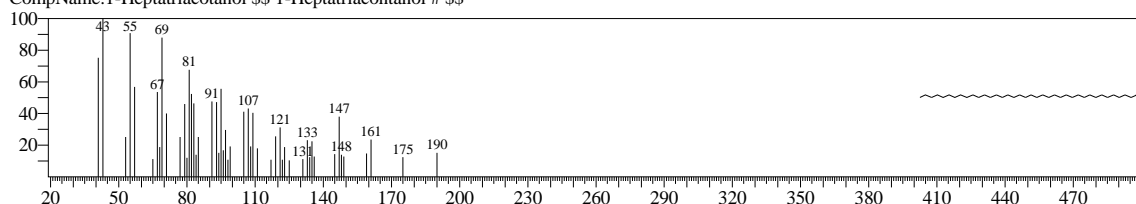

Hit#:5 Entry:105149 Library:NIST08.LIB

SI:73 Formula:C<sub>20</sub>H<sub>34</sub>O CAS:25269-17-4 MolWeight:290 RetIndex:2211

CompName:Thunbergol \$\$ 4-Isopropyl-1,7,11-trimethyl-2,7,11-cyclotetradecatrien-1-ol # \$\$

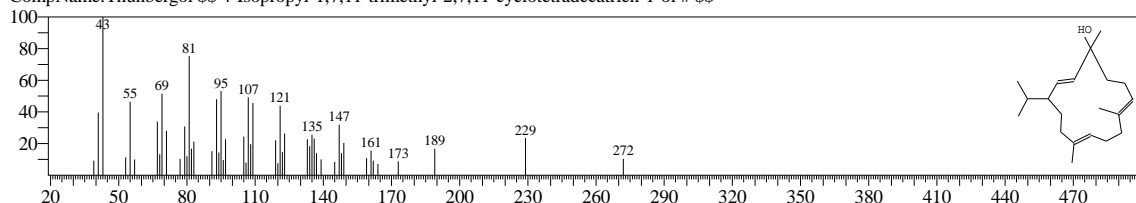

<< Target >>

Line#:37 R.Time:80.875(Scan#:15476) MassPeaks:320

RawMode:Averaged 80.870-80.880(15475-15477) BasePeak:57.05(4392)

BG Mode:Calc. from Peak Group 1 - Event 1

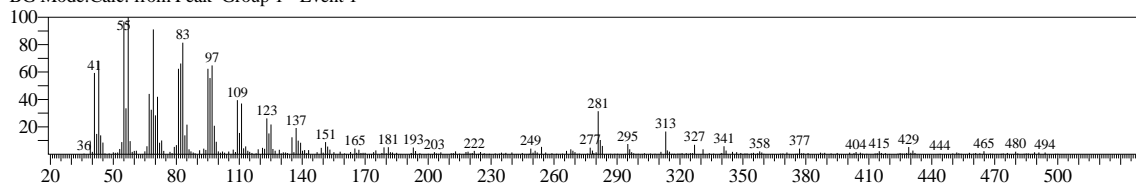

Hit#:1 Entry:89240 Library:NIST08.LIB

SI:87 Formula:C18H36O CAS:7390-81-0 MolWeight:268 RetIndex:1901

CompName:Oxirane, hexadecyl- \$\$ 1,2-Epoxyoctadecane \$\$ 2-Hexadecyloxirane # \$\$

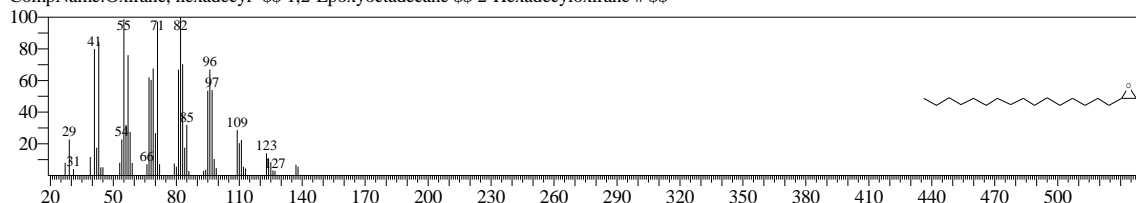

Hit#:2 Entry:20689 Library:NIST08s.LIB

SI:86 Formula:C16H32O CAS:7320-37-8 MolWeight:240 RetIndex:1702

CompName:Oxirane, tetradecyl- \$\$ Hexadecane, 1,2-epoxy- \$\$ Hexadecylene oxide \$\$ 1,2-Epoxyhexadecane \$\$ 1,2-Hexadecane oxide \$\$ 1,2-Hexac

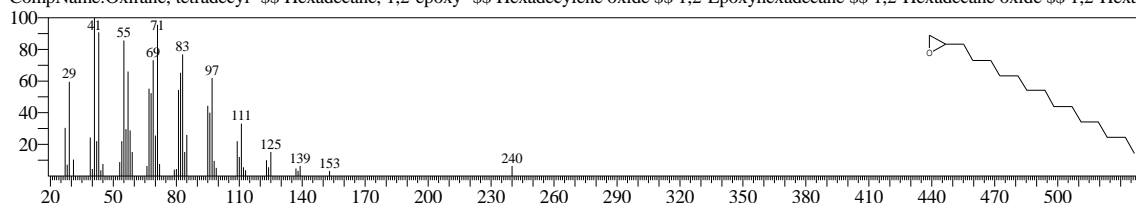

Hit#:3 Entry:20690 Library:NIST08s.LIB

SI:86 Formula:C16H32O CAS:629-80-1 MolWeight:240 RetIndex:1800

CompName:Hexadecanal \$\$ Palmitaldehyde \$\$

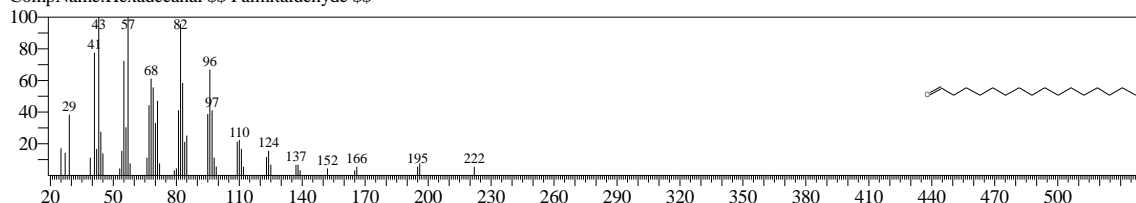

Hit#:4 Entry:186507 Library:NIST08.LIB

SI:86 Formula:C38H74 CAS:0-00-0 MolWeight:530 RetIndex:3779

CompName:1,37-Octatriacontadiene

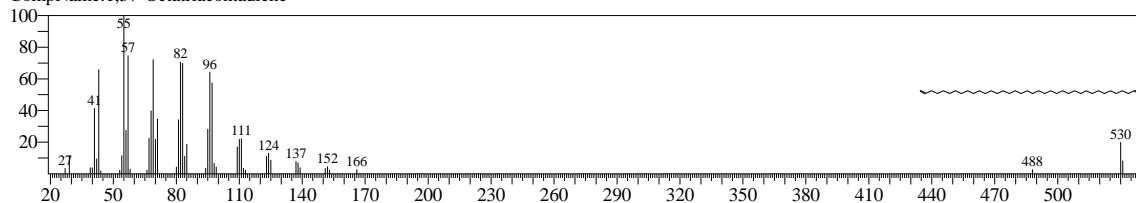

Hit#:5 Entry:22614 Library:NIST08s.LIB

SI:86 Formula:C18H36O CAS:638-66-4 MolWeight:268 RetIndex:1999

CompName:Octadecanal \$\$ Stearaldehyde \$\$ Octadecyl aldehyde \$\$ Stearyl aldehyde \$\$ n-Octadecanal \$\$

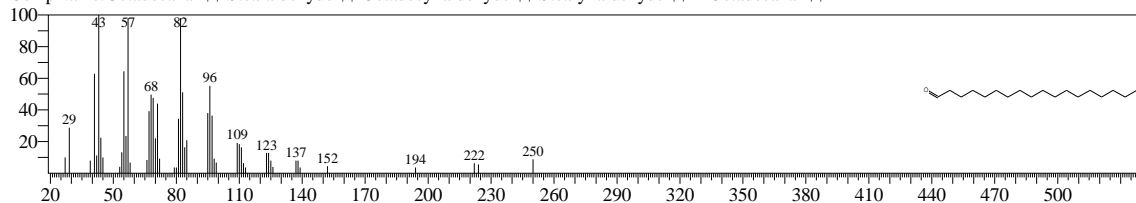

<< Target >>

Line#:38 R.Time:81.585(Scan#:15618) MassPeaks:397

RawMode:Averaged 81.580-81.590(15617-15619) BasePeak:43.05(23211)

BG Mode:Calc. from Peak Group 1 - Event 1

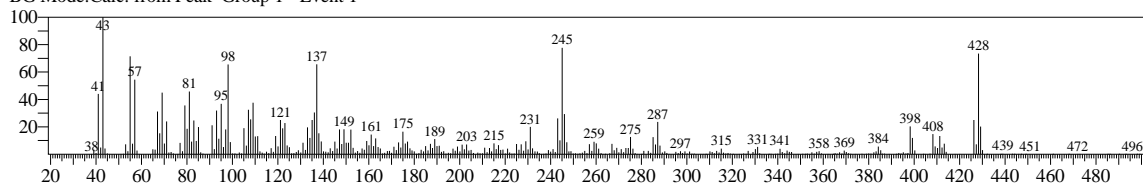

Hit#:1 Entry:175085 Library:NIST08.LIB

SI:79 Formula:C<sub>29</sub>H<sub>48</sub>O<sub>2</sub> CAS:22149-69-5 MolWeight:428 RetIndex:2875

CompName:Stigmastane-3,6-dione, (5.alpha.)- \$\$ 5.alpha.-Stigmastane-3,6-dione \$\$ Stigmastane-3,6-dione # \$\$

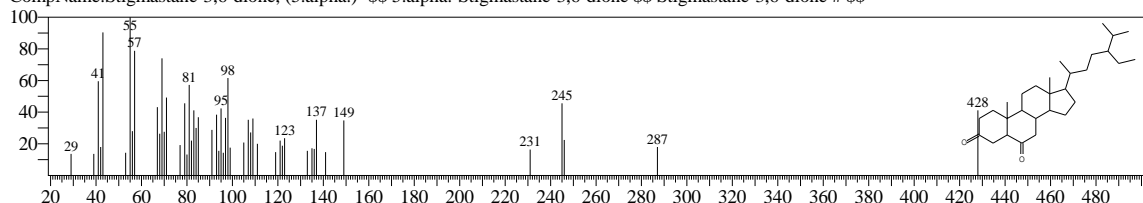

Hit#:2 Entry:27275 Library:NIST08s.LIB

SI:74 Formula:C<sub>27</sub>H<sub>42</sub>O<sub>2</sub> CAS:984-84-9 MolWeight:398 RetIndex:2751

CompName:Cholest-4-ene-3,6-dione \$\$ .delta.(Sup4)-Cholestene-3,6-dione \$\$ .DELTA.4-Cholestene-3,6-dione \$\$ 4-Cholestene-3,6-dione \$\$

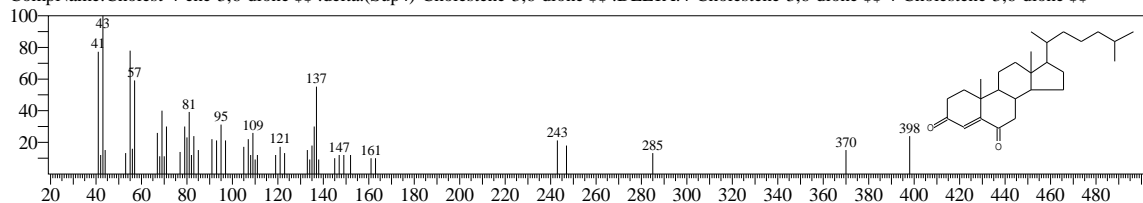

Hit#:3 Entry:168057 Library:NIST08.LIB

SI:72 Formula:C<sub>27</sub>H<sub>44</sub>O<sub>2</sub> CAS:0-00-0 MolWeight:400 RetIndex:2580

CompName:1,2-Epoxycholestan-3-one

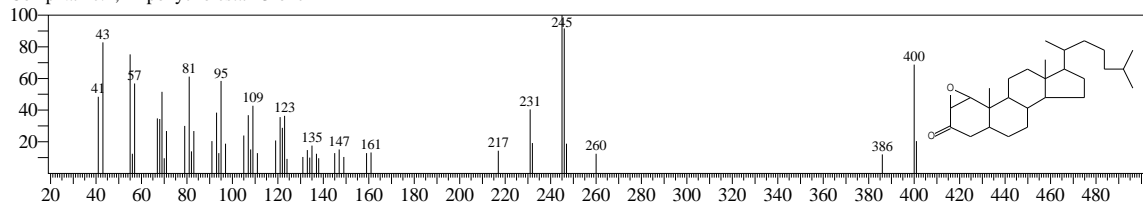

Hit#:4 Entry:116564 Library:NIST08.LIB

SI:71 Formula:C<sub>20</sub>H<sub>34</sub>O<sub>2</sub> CAS:7220-78-2 MolWeight:306 RetIndex:2400

CompName:4,8,13-Cyclotetradecatriene-1,3-diol, 1,5,9-trimethyl-12-(1-methylethyl)- \$\$ FW 306 \$\$ 4,8,13-Duvatriene-1,3-Diol \$\$ 12-Isopropyl-1,5,

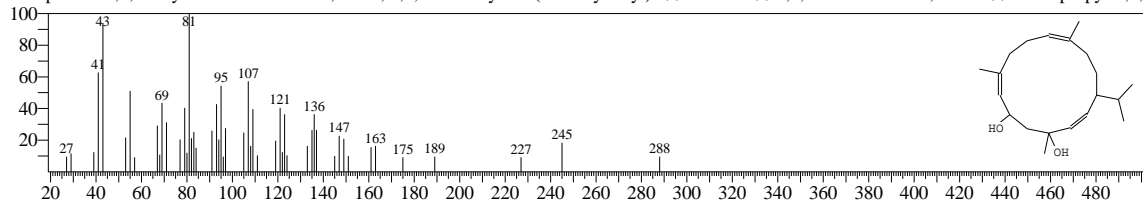

<< Target >>

Line#:39 R.Time:82.700(Scan#:15841) MassPeaks:303

RawMode:Averaged 82.695-82.705(15840-15842) BasePeak:57.05(1649)

BG Mode:Calc. from Peak Group 1 - Event 1

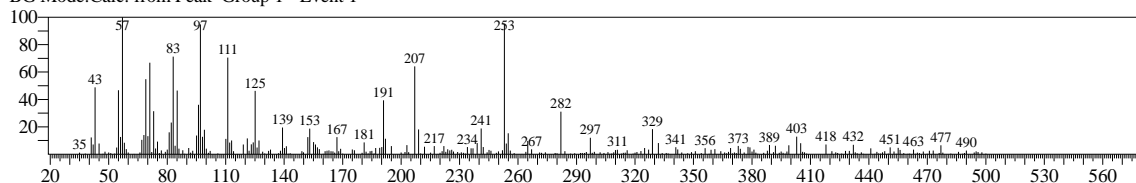

Hit#:1 Entry:188797 Library:NIST08.LIB

SI:73 Formula:C<sub>31</sub>H<sub>55</sub>F<sub>7</sub>O<sub>2</sub> CAS:0-00-0 MolWeight:592 RetIndex:2827

CompName:Heptacosyl heptafluorobutyrate

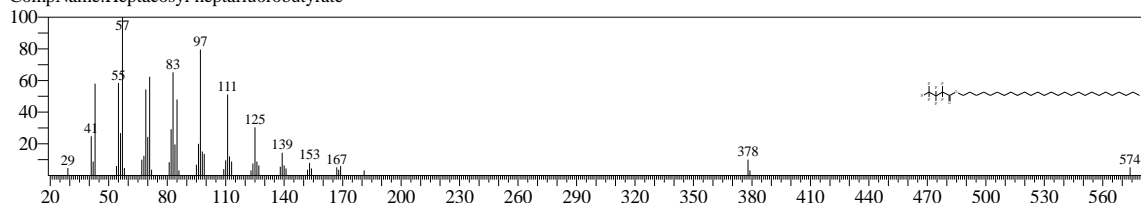

Hit#:2 Entry:160151 Library:NIST08.LIB

SI:72 Formula:C<sub>21</sub>H<sub>39</sub>F<sub>3</sub>O<sub>2</sub> CAS:0-00-0 MolWeight:380 RetIndex:2110

CompName:Nonadecyl trifluoroacetate

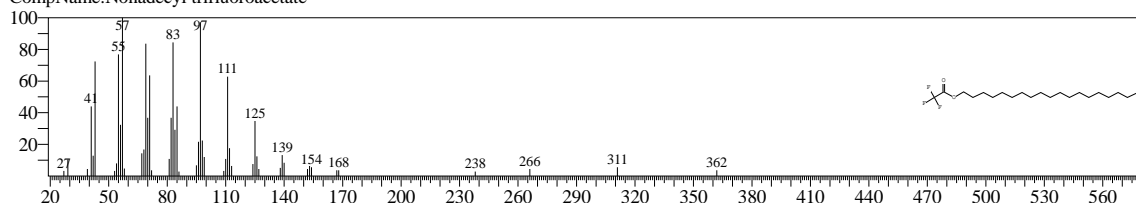

Hit#:3 Entry:182741 Library:NIST08.LIB

SI:72 Formula:C<sub>23</sub>H<sub>39</sub>F<sub>7</sub>O<sub>2</sub> CAS:0-00-0 MolWeight:480 RetIndex:2032

CompName:Nonadecyl heptafluorobutyrate

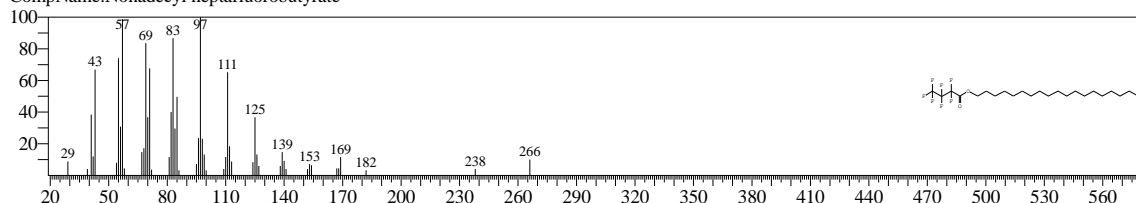

Hit#:4 Entry:27719 Library:NIST08s.LIB

SI:72 Formula:C<sub>30</sub>H<sub>62</sub>O CAS:593-50-0 MolWeight:438 RetIndex:3246

CompName:1-Triacontanol \$\$\$\$ Triacontanol-1 \$\$\$\$ n-Triacontanol \$\$\$\$ Melissyl alcohol \$\$\$\$ Myricyl alcohol \$\$\$\$ Triacontyl alcohol \$\$\$\$

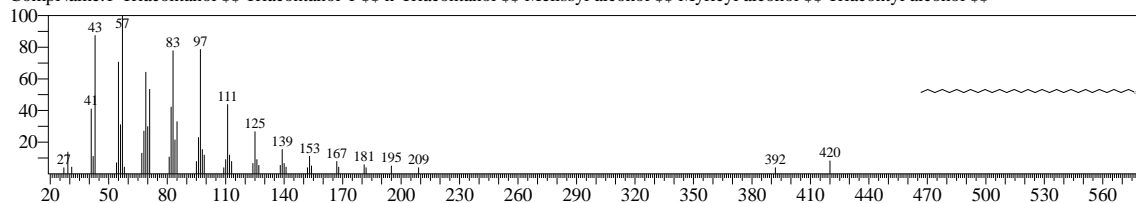

Hit#:5 Entry:166592 Library:NIST08.LIB

SI:72 Formula:C<sub>27</sub>H<sub>56</sub>O CAS:2004-39-9 MolWeight:396 RetIndex:2948

CompName:1-Heptacosanol \$\$\$\$ Heptacosan-1-ol \$\$\$\$ Heptacosanol \$\$\$\$

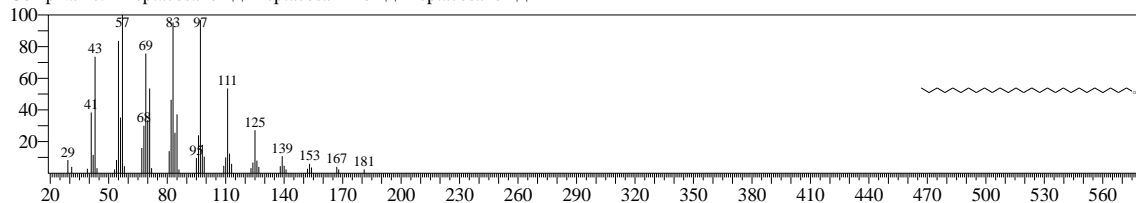

<< Target >>

Line#:40 R.Time:83.090(Scan#:15919) MassPeaks:319

RawMode:Averaged 83.085-83.095(15918-15920) BasePeak:97.10(9117)

BG Mode:Calc. from Peak Group 1 - Event 1

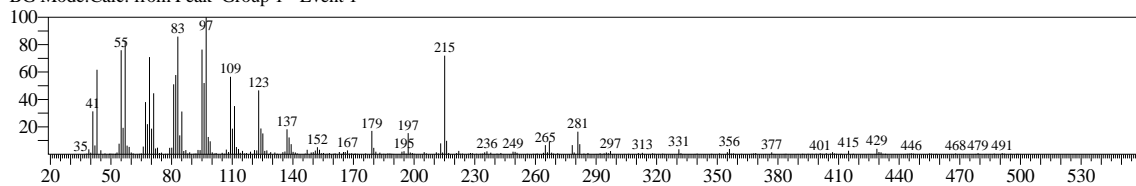

Hit#:1 Entry:188871 Library:NIST08.LIB

SI:84 Formula:C40H82O2 CAS:181719-30-2 MolWeight:594 RetIndex:4483

CompName:Tetracontane-1,40-diol \$\$ 1,40-Tetracontanediol # \$\$

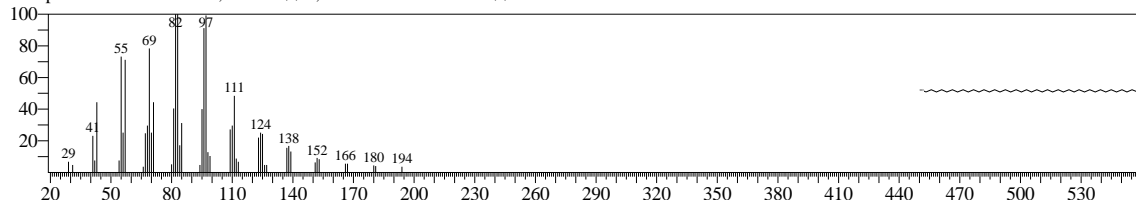

Hit#:2 Entry:22620 Library:NIST08s.LIB

SI:83 Formula:C18H36O CAS:7390-81-0 MolWeight:268 RetIndex:1901

CompName:Oxirane, hexadecyl- \$\$ 1,2-Epoxyoctadecane \$\$ 2-Hexadecyloxirane # \$\$

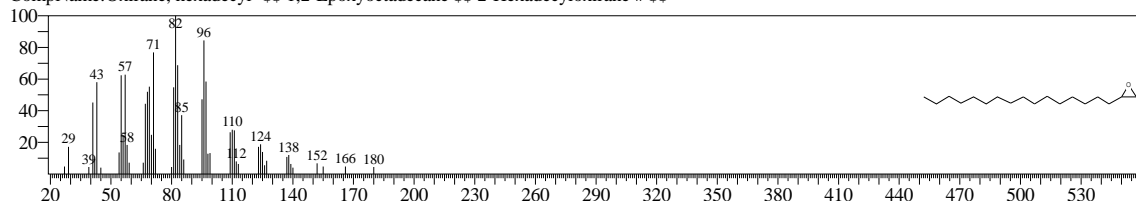

Hit#:3 Entry:186507 Library:NIST08.LIB

SI:82 Formula:C38H74 CAS:0-00-0 MolWeight:530 RetIndex:3779

CompName:1,37-Octatriacontadiene

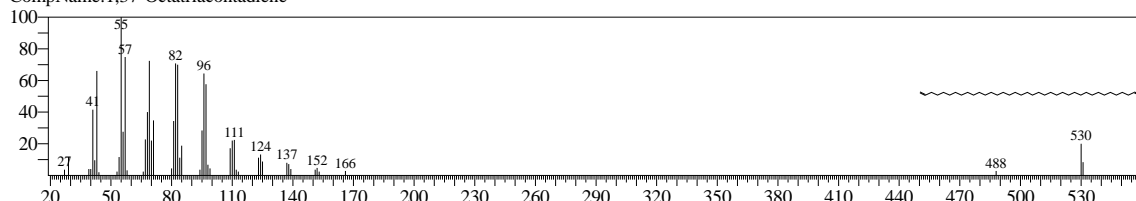

Hit#:4 Entry:20689 Library:NIST08s.LIB

SI:82 Formula:C16H32O CAS:7320-37-8 MolWeight:240 RetIndex:1702

CompName:Oxirane, tetradecyl- \$\$ Hexadecane, 1,2-epoxy- \$\$ Hexadecylene oxide \$\$ 1,2-Epoxyhexadecane \$\$ 1,2-Hexadecane oxide \$\$ 1,2-Hexadecane oxide

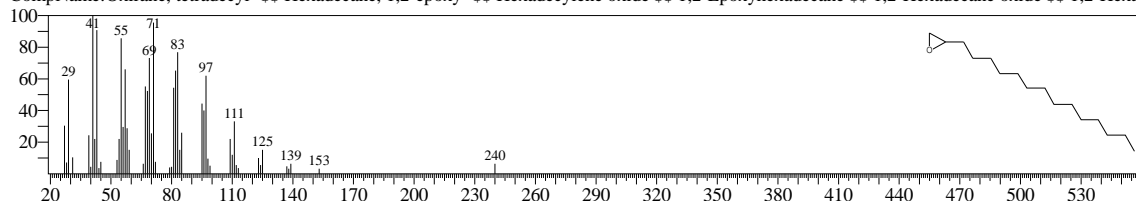

Hit#:5 Entry:153643 Library:NIST08.LIB

SI:82 Formula:C24H46O2 CAS:77899-10-6 MolWeight:366 RetIndex:2679

CompName:(Z)-14-Tricosenyl formate \$\$ (14Z)-14-Tricosenyl formate # \$\$

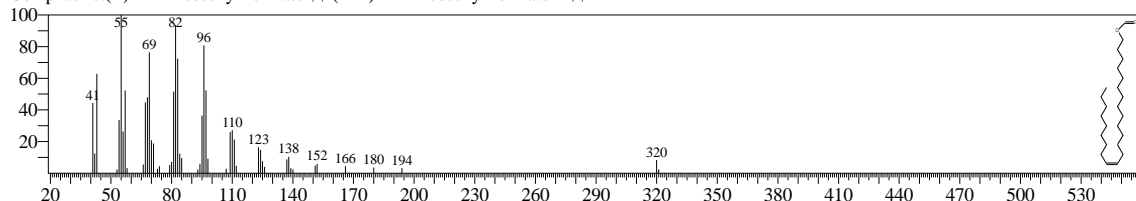

<< Target >>

Line#:41 R.Time:84.900(Scan#:16281) MassPeaks:301

RawMode:Averaged 84.895-84.905(16280-16282) BasePeak:57.05(3833)

BG Mode:Calc. from Peak Group 1 - Event 1

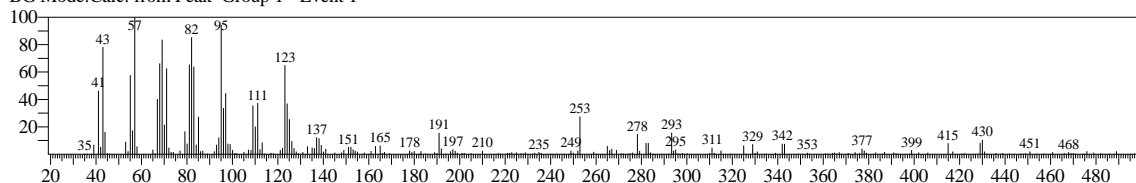

Hit#:1 Entry:109355 Library:NIST08.LIB

SI:85 Formula:C20H40O CAS:102608-53-7 MolWeight:296 RetIndex:2045

CompName:3,7,11,15-Tetramethyl-2-hexadecen-1-ol (2E)-3,7,11,15-Tetramethyl-2-hexadecen-1-ol #



Hit#:2 Entry:89240 Library:NIST08.LIB

SI:83 Formula:C18H36O CAS:7390-81-0 MolWeight:268 RetIndex:1901

CompName:Oxirane, hexadecyl- 1,2-Epoxyoctadecane 2-Hexadecyloxirane #

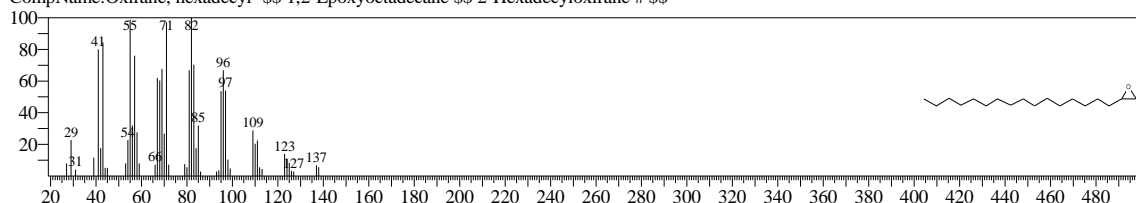

Hit#:3 Entry:22614 Library:NIST08s.LIB

SI:82 Formula:C18H36O CAS:638-66-4 MolWeight:268 RetIndex:1999

CompName:Octadecanal Stearaldehyde Octadecyl aldehyde Stearyl aldehyde n-Octadecanal

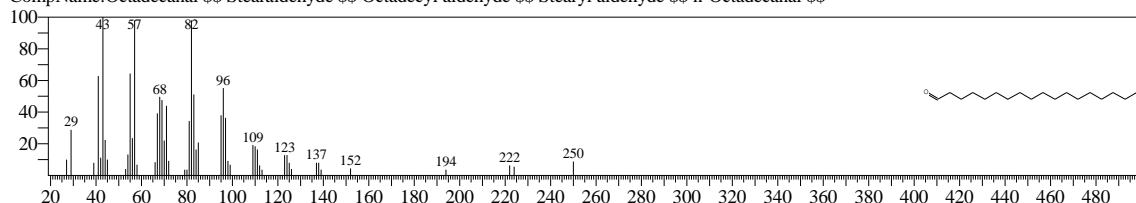

Hit#:4 Entry:20690 Library:NIST08s.LIB

SI:81 Formula:C16H32O CAS:629-80-1 MolWeight:240 RetIndex:1800

CompName:Hexadecanal Palmitaldehyde

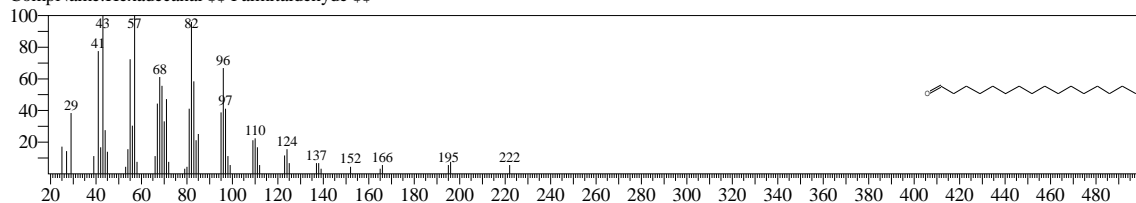

Hit#:5 Entry:60326 Library:NIST08.LIB

SI:81 Formula:C15H30O CAS:2765-11-9 MolWeight:226 RetIndex:1701

CompName:Pentadecanal

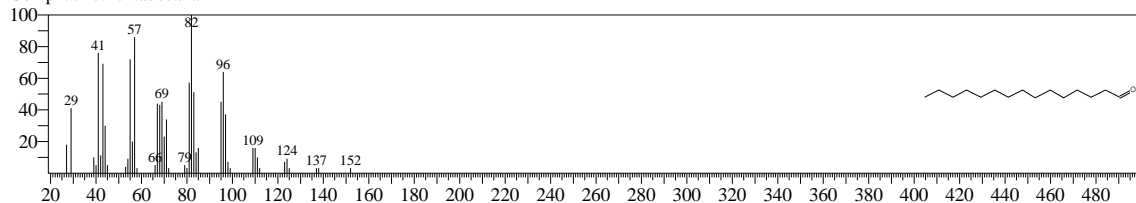

Line#:42 R.Time:86.175(Scan#:16536) MassPeaks:390  
RawMode:Averaged 86.170-86.180(16535-16537) BasePeak:241.15(59823)  
BG Mode:Calc. from Peak Group 1 - Event 1

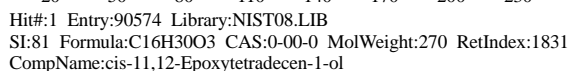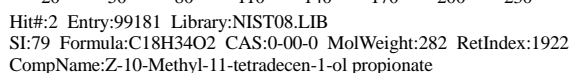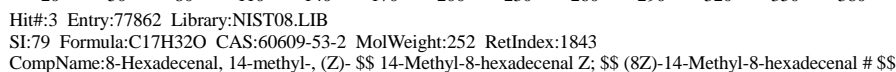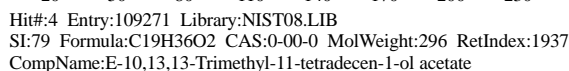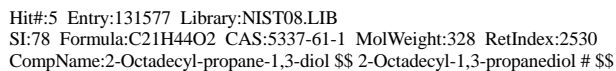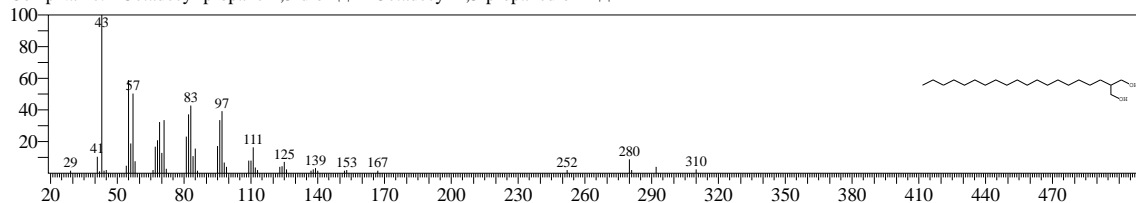

<< Target >>

Line#:43 R.Time:87.690(Scan#:16839) MassPeaks:359

RawMode:Averaged 87.685-87.695(16838-16840) BasePeak:57.05(14391)

BG Mode:Calc. from Peak Group 1 - Event 1

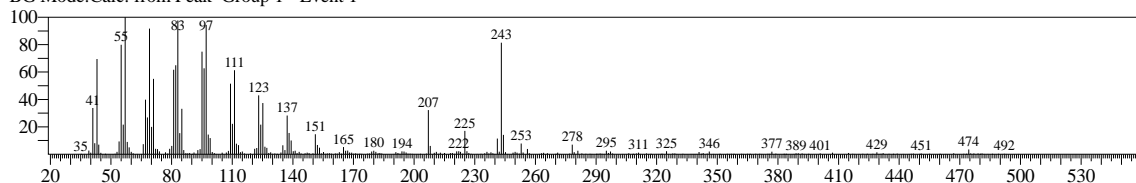

Hit#:1 Entry:188871 Library:NIST08.LIB

SI:85 Formula:C<sub>40</sub>H<sub>82</sub>O<sub>2</sub> CAS:181719-30-2 MolWeight:594 RetIndex:4483

CompName:Tetracontane-1,40-diol \$\$ 1,40-Tetracontanediol # \$\$

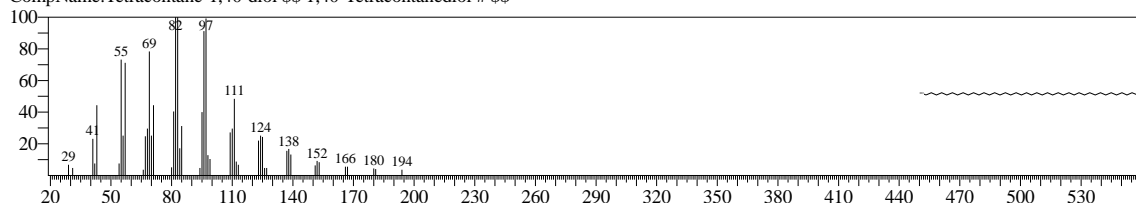

Hit#:2 Entry:22620 Library:NIST08s.LIB

SI:82 Formula:C<sub>18</sub>H<sub>36</sub>O CAS:7390-81-0 MolWeight:268 RetIndex:1901

CompName:Oxirane, hexadecyl- \$\$ 1,2-Epoxyoctadecane \$\$ 2-Hexadecyloxirane # \$\$

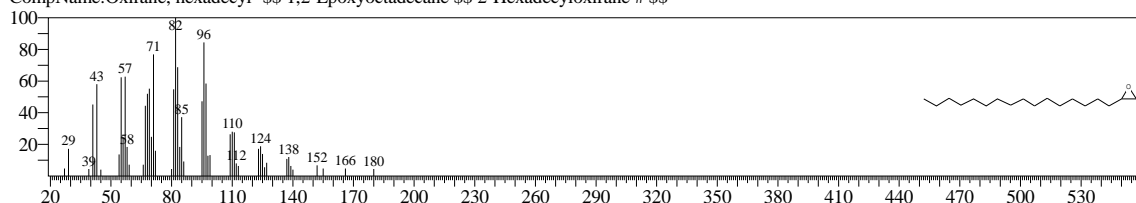

Hit#:3 Entry:166592 Library:NIST08.LIB

SI:82 Formula:C<sub>27</sub>H<sub>56</sub>O CAS:2004-39-9 MolWeight:396 RetIndex:2948

CompName:1-Heptacosanol \$\$ Heptacosan-1-ol \$\$ Heptacosanol \$\$

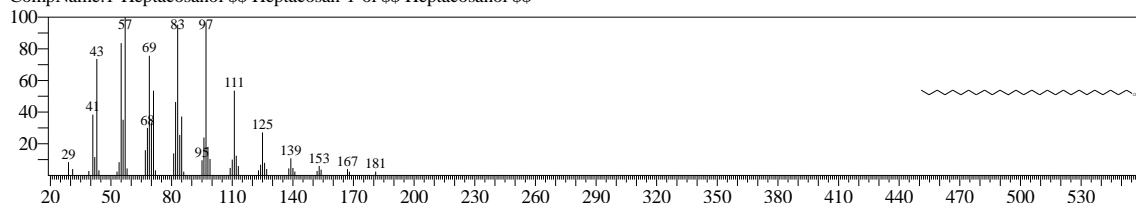

Hit#:4 Entry:28085 Library:NIST08s.LIB

SI:82 Formula:C<sub>36</sub>H<sub>68</sub>O<sub>2</sub> CAS:3687-45-4 MolWeight:532 RetIndex:3783

CompName:9-Octadecenoic acid (Z)-, 9-octadecenyl ester, (Z)- \$\$ Oleic acid, (Z)-9-octadecenyl ester \$\$ Cetiol \$\$ Oleic acid oleyl ester \$\$ Oleyl ole:

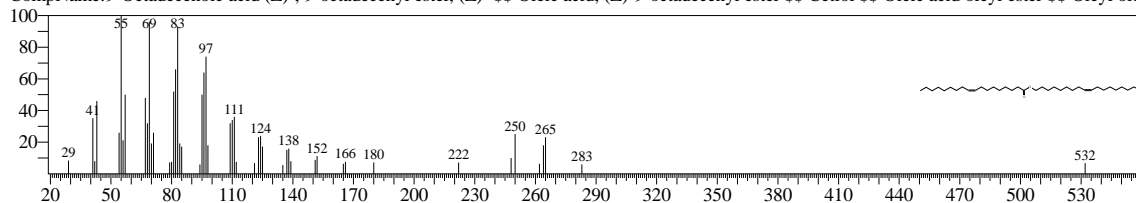

Hit#:5 Entry:186507 Library:NIST08.LIB

SI:82 Formula:C<sub>38</sub>H<sub>74</sub> CAS:0-00-0 MolWeight:530 RetIndex:3779

CompName:1,37-Octatriacontadiene

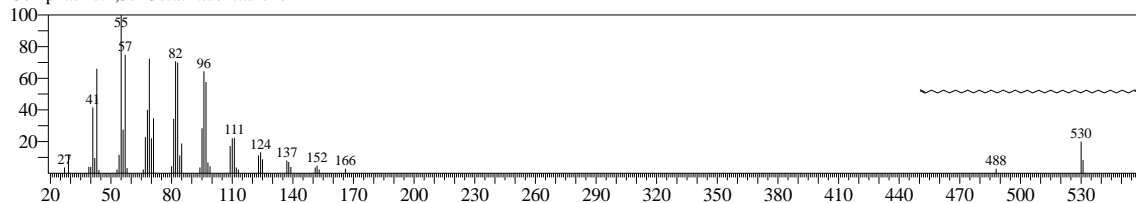

<< Target >>

Line#:44 R.Time:91.710(Scan#:17643) MassPeaks:304

RawMode:Averaged 91.705-91.715(17642-17644) BasePeak:269.10(4372)

BG Mode:Calc. from Peak Group 1 - Event 1

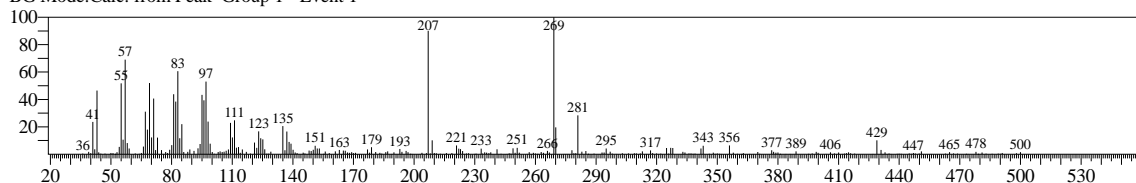

Hit#:1 Entry:99187 Library:NIST08.LIB

SI:76 Formula:C<sub>18</sub>H<sub>34</sub>O<sub>2</sub> CAS:0-00-0 MolWeight:282 RetIndex:1899

CompName:11,13-Dimethyl-12-tetradecen-1-ol acetate

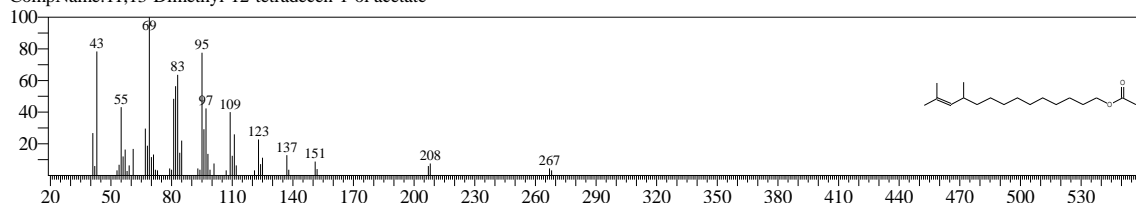

Hit#:2 Entry:186507 Library:NIST08.LIB

SI:76 Formula:C<sub>38</sub>H<sub>74</sub> CAS:0-00-0 MolWeight:530 RetIndex:3779

CompName:1,37-Octatriacontadiene

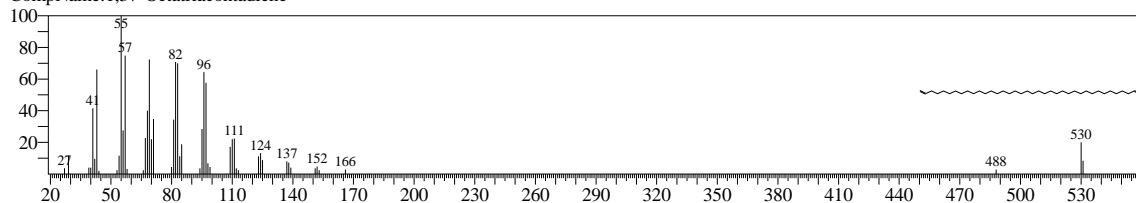

Hit#:3 Entry:179650 Library:NIST08.LIB

SI:75 Formula:C<sub>30</sub>H<sub>62</sub>O<sub>2</sub> CAS:36645-68-8 MolWeight:454 RetIndex:3489

CompName:1,30-Triacontanediol

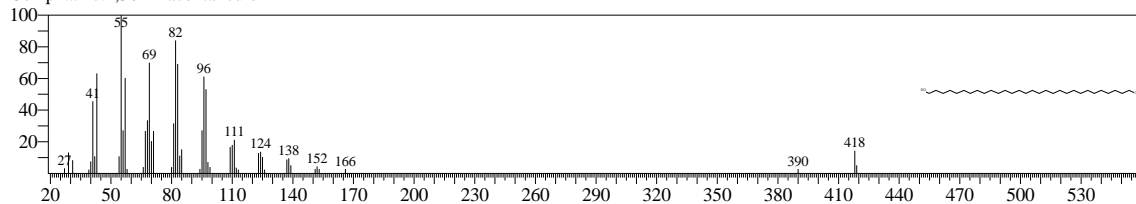

Hit#:4 Entry:188871 Library:NIST08.LIB

SI:75 Formula:C<sub>40</sub>H<sub>82</sub>O<sub>2</sub> CAS:181719-30-2 MolWeight:594 RetIndex:4483

CompName:Tetracontane-1,40-diol \$ 1,40-Tetracontanediol # \$

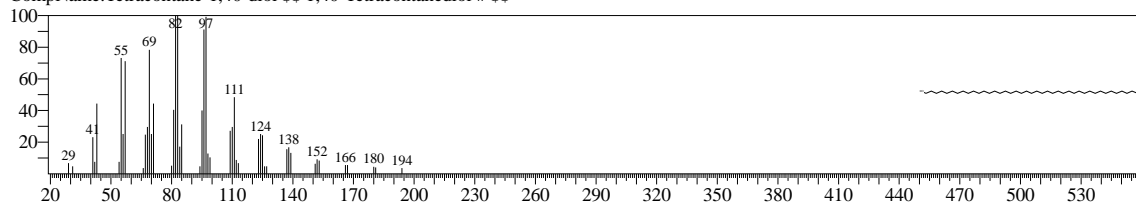

Hit#:5 Entry:22620 Library:NIST08s.LIB

SI:75 Formula:C<sub>18</sub>H<sub>36</sub>O CAS:7390-81-0 MolWeight:268 RetIndex:1901

CompName:Oxirane, hexadecyl- \$ 1,2-Epoxyoctadecane \$ 2-Hexadecyloxirane # \$

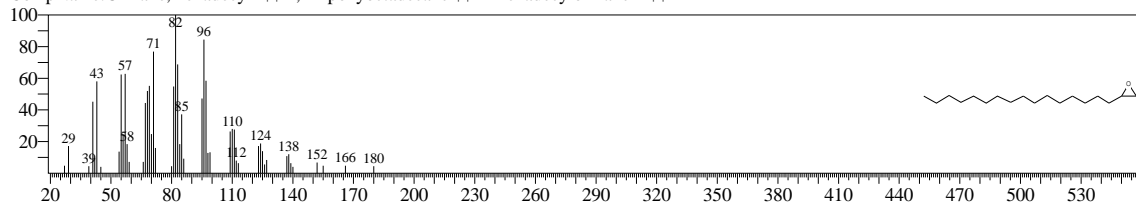

<< Target >>

Line#:45 R.Time:93.790(Scan#:18059) MassPeaks:323

RawMode:Averaged 93.785-93.795(18058-18060) BasePeak:97.10(7637)

BG Mode:Calc. from Peak Group 1 - Event 1

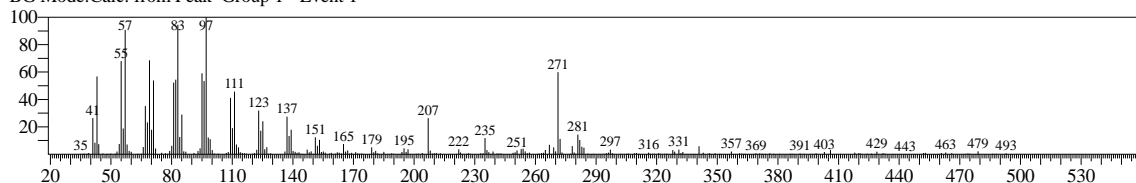

Hit#:1 Entry:188871 Library:NIST08.LIB

SI:86 Formula:C<sub>40</sub>H<sub>82</sub>O<sub>2</sub> CAS:181719-30-2 MolWeight:594 RetIndex:4483

CompName:Tetracontane-1,40-diol \$\$ 1,40-Tetracontanediol # \$\$



Hit#:2 Entry:186507 Library:NIST08.LIB

SI:82 Formula:C<sub>38</sub>H<sub>74</sub> CAS:0-00-0 MolWeight:530 RetIndex:3779

CompName:1,37-Octatriacontadiene

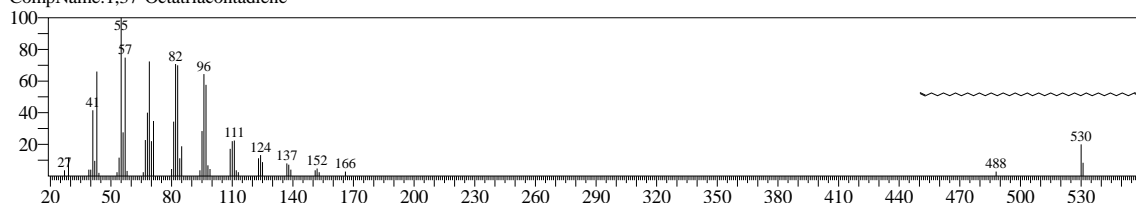

Hit#:3 Entry:22620 Library:NIST08s.LIB

SI:82 Formula:C<sub>18</sub>H<sub>36</sub>O CAS:7390-81-0 MolWeight:268 RetIndex:1901

CompName:Oxirane, hexadecyl- \$\$ 1,2-Epoxyoctadecane \$\$ 2-Hexadecyloxirane # \$\$

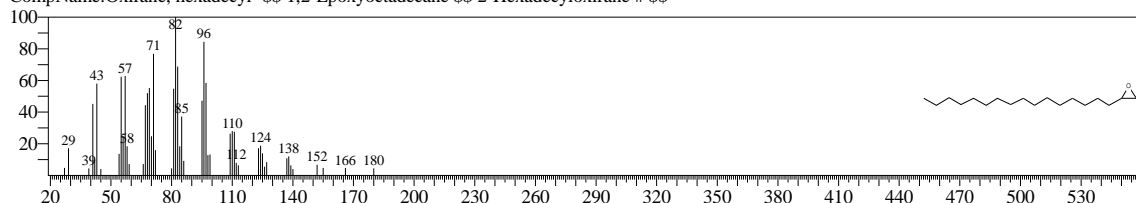

Hit#:4 Entry:166592 Library:NIST08.LIB

SI:82 Formula:C<sub>27</sub>H<sub>56</sub>O CAS:2004-39-9 MolWeight:396 RetIndex:2948

CompName:1-Heptacosanol \$\$ Heptacosan-1-ol \$\$ Heptacosanol \$\$

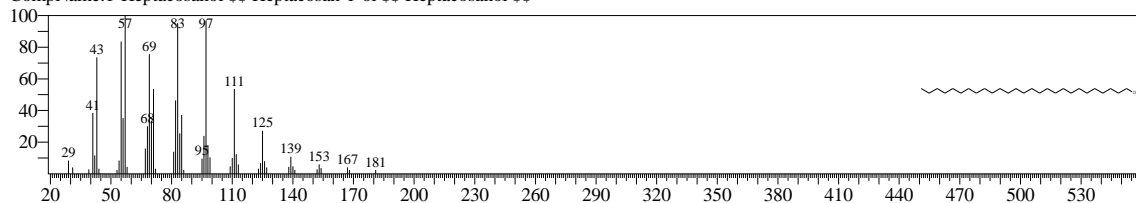

Hit#:5 Entry:180923 Library:NIST08.LIB

SI:82 Formula:C<sub>22</sub>H<sub>35</sub>F<sub>7</sub>O<sub>2</sub> CAS:0-00-0 MolWeight:464 RetIndex:1940

CompName:Oleyl alcohol, heptafluorobutyrate

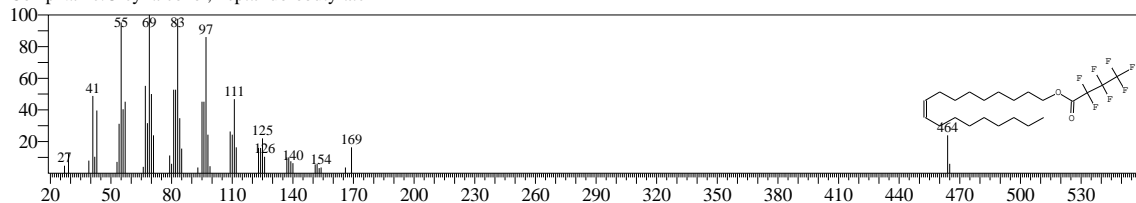

Supplement: f1 [file 7453816.f1.zip › 7453816.f1/A1_LIB_JCHEM_2541772.pdf]
