# Supplementary material for: Evaluation of Two Different Solvents for Azolla pinnata Extracts on Chemical Compositions and Larvicidal Activity against Aedes albopictus (Diptera: Culicidae)
Source: Hindawi journal article supplement (doi:10.1155/2018/7453816), 2018-11-13

## Sample Information

## LIBRARY SEARCH

ID : M1  
Sample Name : M1  
Date : 17/4/2018

## Library

&lt;&lt; Target &gt;&gt;

Line#:1 R.Time:4.770(Scan#:255) MassPeaks:224

RawMode:Averaged 4.765-4.775(254-256) BasePeak:61.00(24831)

BG Mode:Calc. from Peak Group 1 - Event 1

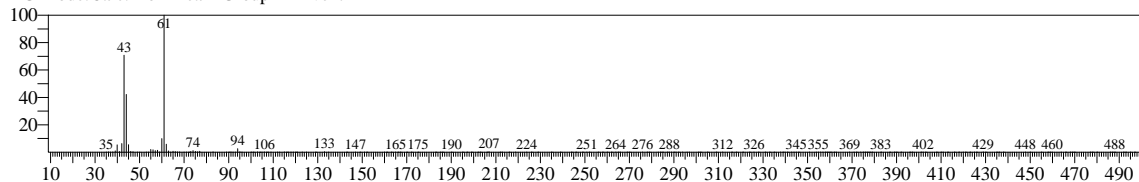

Hit#:1 Entry:1215 Library:NIST08s.LIB

SI:96 Formula:C3H8O3 CAS:56-81-5 MolWeight:92 RetIndex:967

CompName:Glycerin \$\$ 1,2,3-Propanetriol \$\$ Glycerol \$\$ Glycerine \$\$ Glyceritol \$\$ Glycyl alcohol \$\$ Glyrol \$\$ Glysanin \$\$ Osmoglyn \$\$ Propan

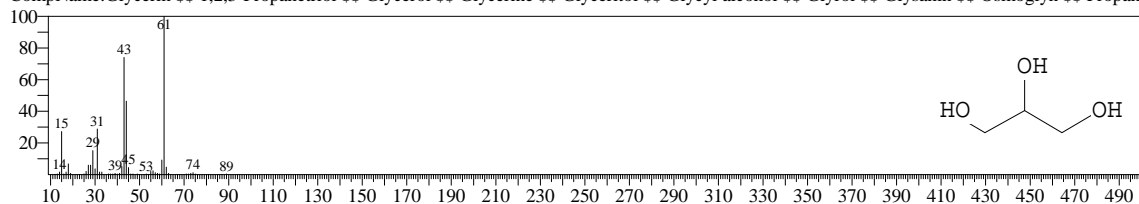

Hit#:2 Entry:4132 Library:NIST08s.LIB

SI:86 Formula:C4H10O4 CAS:2319-57-5 MolWeight:122 RetIndex:1229

CompName:1,2,3,4-Butanetetrol, [S-(R\*,R\*)]- \$\$ Erythritol \$\$ l-Threitol \$\$ 1,2,3,4-Butanetetrol # \$\$

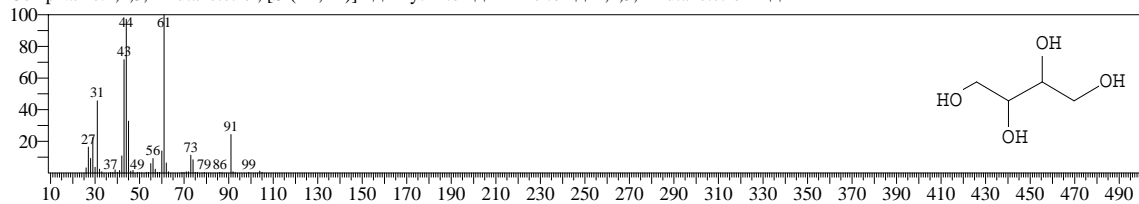

Hit#:3 Entry:4131 Library:NIST08s.LIB

SI:86 Formula:C4H10O4 CAS:149-32-6 MolWeight:122 RetIndex:1229

CompName:2(R),3(S)-1,2,3,4-Butanetetrol \$\$ meso-Erythritol \$\$ Erythritol \$\$ 1,2,3,4-Tetrahydroxybutane \$\$ 1,2,3,4-Butanetetrol, (R\*,S\*)- \$\$ Buta

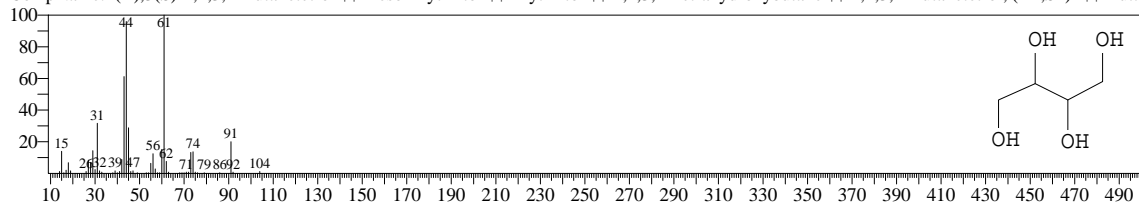

Hit#:4 Entry:22749 Library:NIST08.LIB

SI:85 Formula:C6H14O5 CAS:627-82-7 MolWeight:166 RetIndex:1504

CompName:Diglycerol \$\$ 1,2-Propanediol, 3,3'-oxybis- \$\$ .alpha.,.alpha.'-Diglycerol \$\$ Diglycerine \$\$ 1,2-Propanediol, 3,3'-oxydi- \$\$ 3,3'-Oxydi-1,

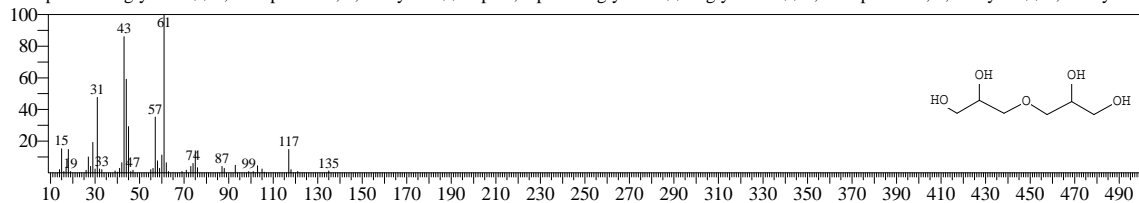

Hit#:5 Entry:1111 Library:NIST08.LIB

SI:85 Formula:C3H6O3 CAS:56-82-6 MolWeight:90 RetIndex:913

CompName:dl-Glyceraldehyde \$\$ Propanal, 2,3-dihydroxy-, (.+/-)- \$\$ Propanal, 2,3-dihydroxy-, (.+/-)- \$\$ Glyceraldehyde, dl- \$\$ Glyceraldehyde, (.

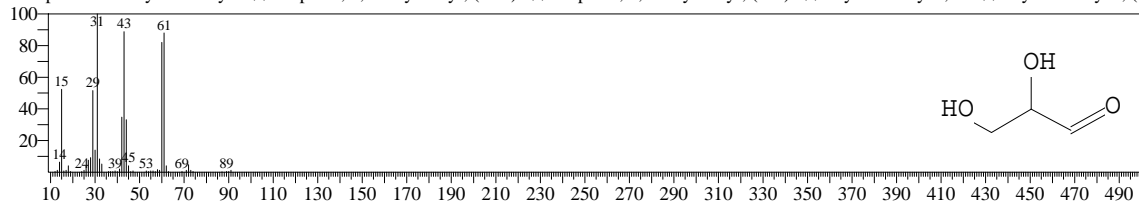

<< Target >>

Line#:2 R.Time:12.030(Scan#:1707) MassPeaks:257

RawMode:Averaged 12.025-12.035(1706-1708) BasePeak:120.05(4069)

BG Mode:Calc. from Peak Group 1 - Event 1

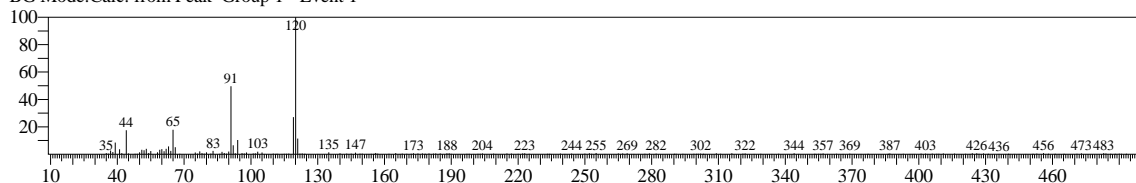

Hit#:1 Entry:3983 Library:NIST08s.LIB

SI:83 Formula:C<sub>8</sub>H<sub>8</sub>O CAS:496-16-2 MolWeight:120 RetIndex:1036

CompName:Benzo[1,2-b:4,5-b']difuran, 2,3-dihydro- \$\$ Coumaran \$\$ Dihydrobenzofuran \$\$ Dihydrocoumarone \$\$ Kumaran \$\$ 2,3-Dihydrobenzofuran \$\$ 2,3-Dihydrocoumarone

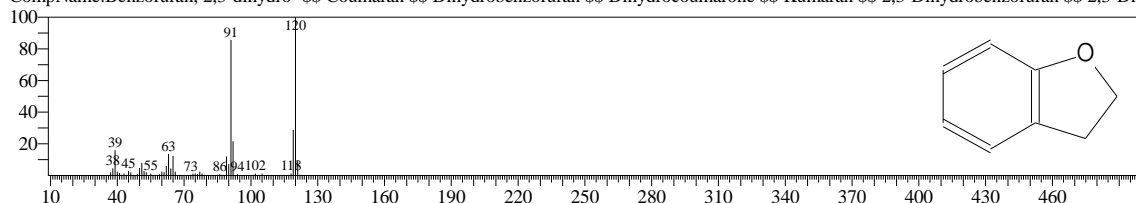

Hit#:2 Entry:3981 Library:NIST08s.LIB

SI:81 Formula:C<sub>8</sub>H<sub>8</sub>O CAS:104-87-0 MolWeight:120 RetIndex:1095

CompName:Benzo[1,2-b:4,5-b']difuran, 2,3-dihydro- \$\$ Coumaran \$\$ Dihydrobenzofuran \$\$ Dihydrocoumarone \$\$ Kumaran \$\$ 2,3-Dihydrobenzofuran \$\$ 2,3-Dihydrocoumarone

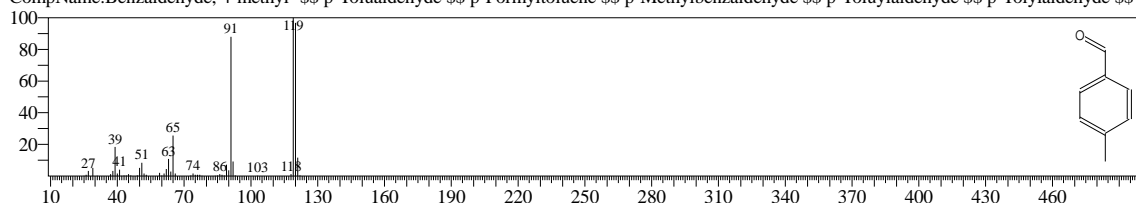

Hit#:3 Entry:15047 Library:NIST08s.LIB

SI:80 Formula:C<sub>8</sub>H<sub>10</sub>N<sub>2</sub>O CAS:937-24-6 MolWeight:150 RetIndex:1365

CompName:p-Toluidine, N-methyl-N-nitroso- \$\$ 1-Methyl-1-(4-methylphenyl)-2-oxohydrazine # \$\$

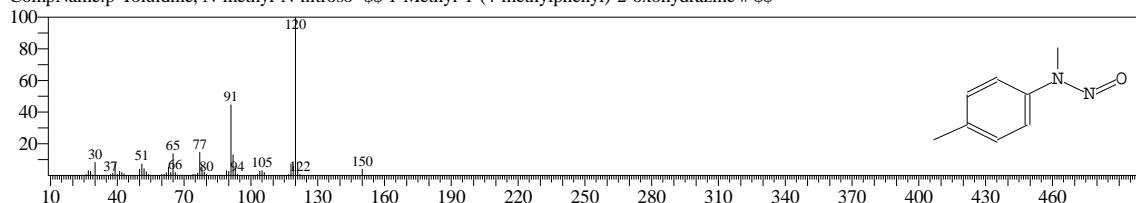

Hit#:4 Entry:3982 Library:NIST08s.LIB

SI:80 Formula:C<sub>8</sub>H<sub>8</sub>O CAS:766-94-9 MolWeight:120 RetIndex:959

CompName:Benzo[1,2-b:4,5-b']difuran, 2,3-dihydro- \$\$ Coumaran \$\$ Dihydrobenzofuran \$\$ Dihydrocoumarone \$\$ Kumaran \$\$ 2,3-Dihydrobenzofuran \$\$ 2,3-Dihydrocoumarone

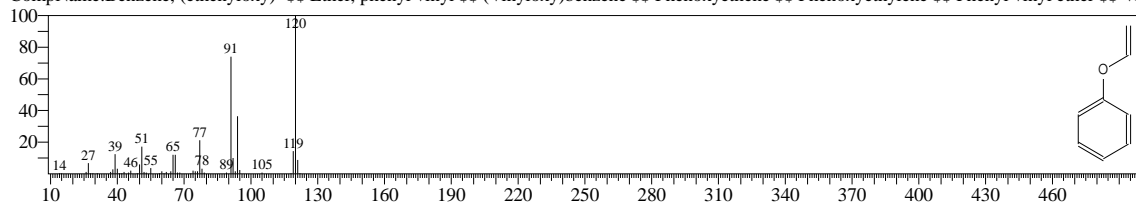

Hit#:5 Entry:14485 Library:NIST08s.LIB

SI:80 Formula:C<sub>10</sub>H<sub>12</sub>O CAS:5459-40-5 MolWeight:148 RetIndex:1172

CompName:4-Ethoxystyrene \$\$ p-Ethoxystyrene \$\$ Benzene, 1-ethenyl-4-ethoxy- \$\$ 1-Ethoxy-4-vinylbenzene # \$\$

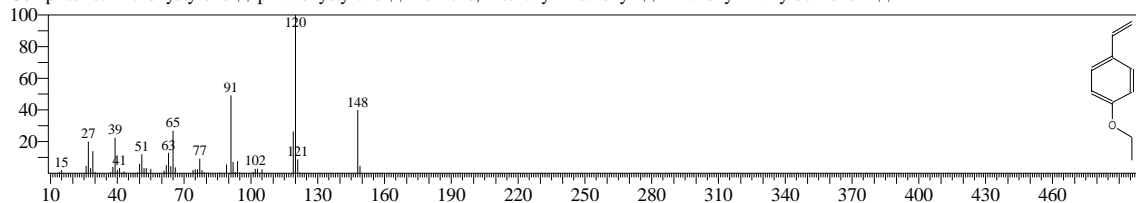

<< Target >>

Line#:3 R.Time:12.060(Scan#:1713) MassPeaks:265

RawMode:Averaged 12.055-12.065(1712-1714) BasePeak:120.05(1828)

BG Mode:Calc. from Peak Group 1 - Event 1

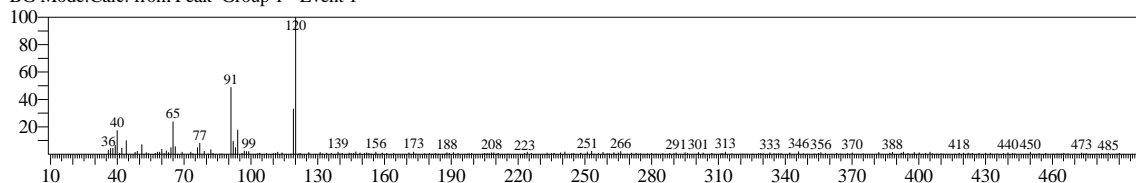

Hit#:1 Entry:3982 Library:NIST08s.LIB

SI:77 Formula:C<sub>8</sub>H<sub>8</sub>O CAS:766-94-9 MolWeight:120 RetIndex:959

CompName:Benzene, (ethenyl-)- \$\$ Ether, phenyl vinyl \$\$ (Vinyl-)-benzene \$\$ Phenoxyethene \$\$ Phenoxyethylene \$\$ Phenyl vinyl ether \$\$ Vi

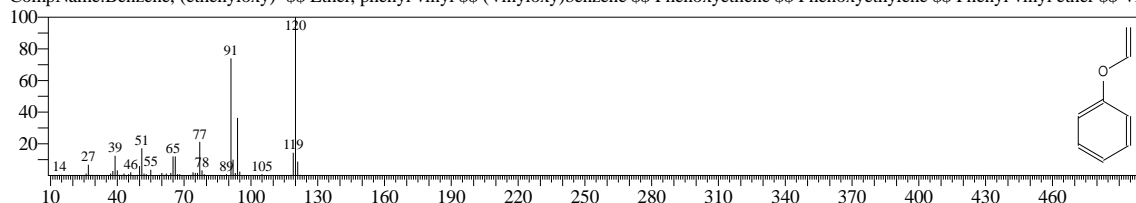

Hit#:2 Entry:5289 Library:NIST08s.LIB

SI:74 Formula:C<sub>8</sub>H<sub>8</sub>O CAS:496-16-2 MolWeight:120 RetIndex:1036

CompName:Benzofuran, 2,3-dihydro- \$\$ Coumaran \$\$ Dihydrobenzofuran \$\$ Dihydrocoumarone \$\$ Kumaran \$\$ 2,3-Dihydrobenzofuran \$\$ 2,3-Dih

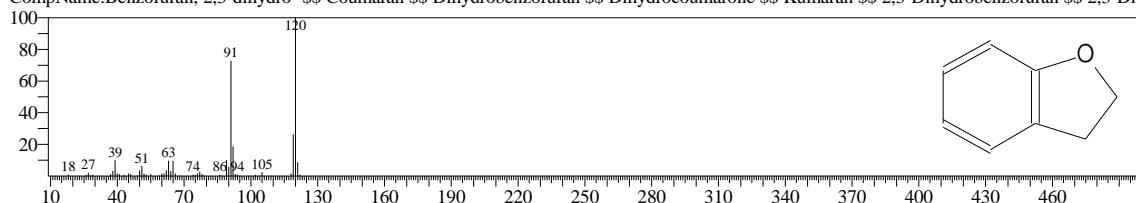

Hit#:3 Entry:3981 Library:NIST08s.LIB

SI:73 Formula:C<sub>8</sub>H<sub>8</sub>O CAS:104-87-0 MolWeight:120 RetIndex:1095

CompName:Benzaldehyde, 4-methyl- \$\$ p-Tolualdehyde \$\$ p-Formyltoluene \$\$ p-Methylbenzaldehyde \$\$ p-Tolualdehyde \$\$ p-Tolylaldehyde \$\$ 4

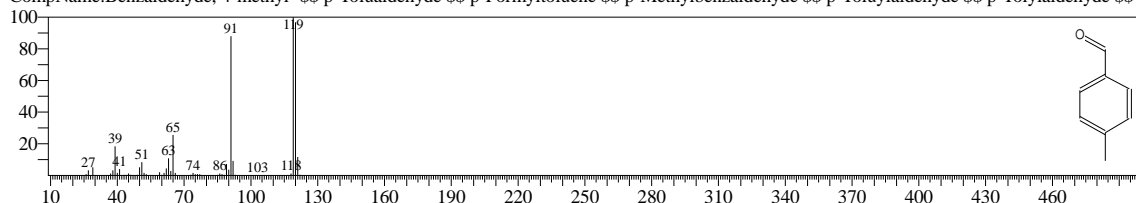

Hit#:4 Entry:15047 Library:NIST08s.LIB

SI:72 Formula:C<sub>8</sub>H<sub>10</sub>N<sub>2</sub>O CAS:937-24-6 MolWeight:150 RetIndex:1365

CompName:p-Toluidine, N-methyl-N-nitroso- \$\$ 1-Methyl-1-(4-methylphenyl)-2-oxohydrazine # \$\$

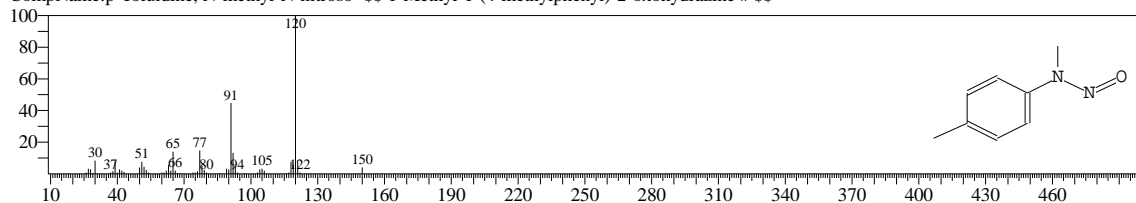

Hit#:5 Entry:14485 Library:NIST08s.LIB

SI:72 Formula:C<sub>10</sub>H<sub>12</sub>O CAS:5459-40-5 MolWeight:148 RetIndex:1172

CompName:4-Ethoxystyrene \$\$ p-Ethoxystyrene \$\$ Benzene, 1-ethenyl-4-ethoxy- \$\$ 1-Ethoxy-4-vinylbenzene # \$\$



<< Target >>

Line#4 R.Time:18.355(Scan#:2972) MassPeaks:234

RawMode:Averaged 18.350-18.360(2971-2973) BasePeak:84.05(31566)

BG Mode:Calc. from Peak Group 1 - Event 1

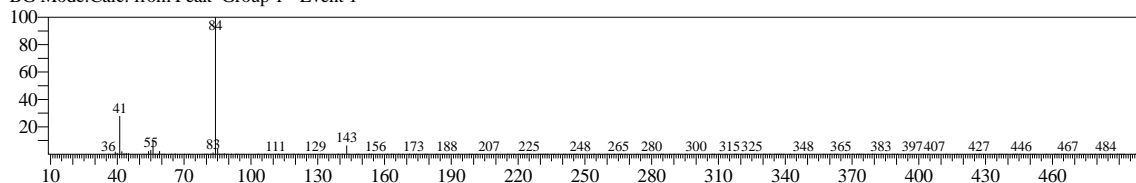

Hit#1 Entry:7501 Library:NIST08s.LIB

SI:97 Formula:C6H9NO3 CAS:54571-66-3 MolWeight:143 RetIndex:1091

CompName:DL-Proline, 5-oxo-, methyl ester \$\$ Methyl 5-oxo-2-pyrrolidinecarboxylate # \$\$ 2-Pyrrolidone-5-carboxylic acid, methyl ester \$\$ Methyl

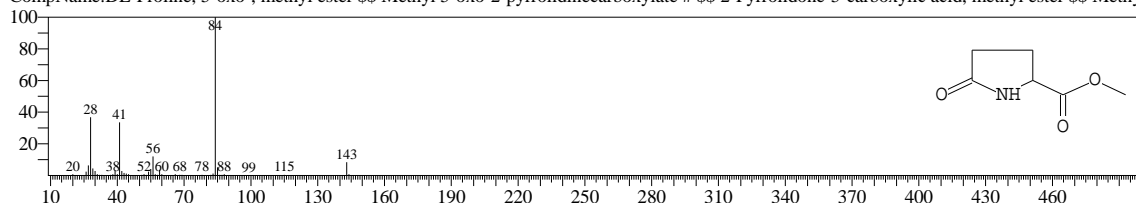

Hit#2 Entry:12372 Library:NIST08.LIB

SI:95 Formula:C6H9NO3 CAS:4931-66-2 MolWeight:143 RetIndex:1091

CompName:L-Proline, 5-oxo-, methyl ester \$\$ Proline, 5-oxo-, methyl ester \$\$ (S)-5-(Methoxycarbonyl)-2-pyrrolidone \$\$ Methyl pyroglutamate \$\$ M

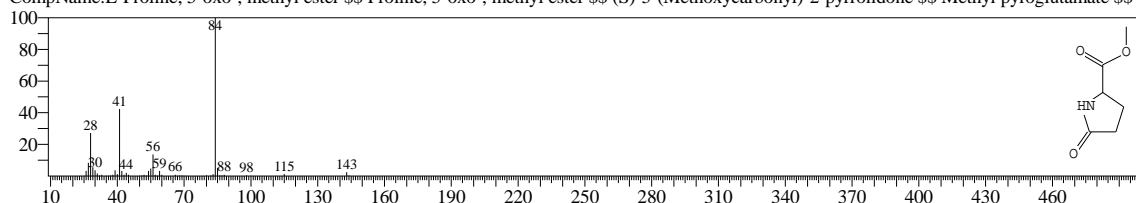

Hit#3 Entry:7491 Library:NIST08.LIB

SI:93 Formula:C5H7NO3 CAS:98-79-3 MolWeight:129 RetIndex:1180

CompName:Pidolic Acid \$\$ (S)-(-)-2-Pyrrolidone-5-carboxylic acid \$\$ 5-Oxo-L-proline \$\$ L-Pyroglutamic acid \$\$ L-2-Pyrrolidone-5-carboxylic acid

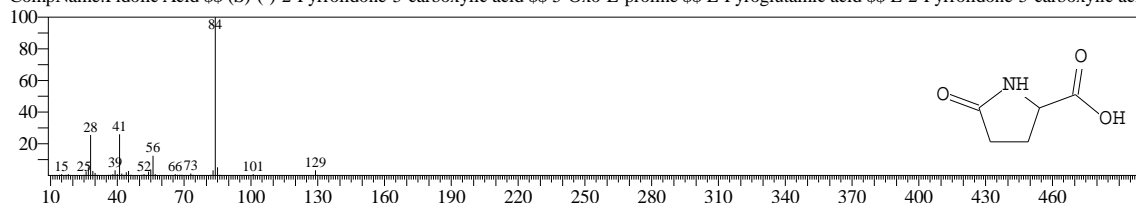

Hit#4 Entry:7490 Library:NIST08.LIB

SI:93 Formula:C5H7NO3 CAS:149-87-1 MolWeight:129 RetIndex:1180

CompName:DL-Proline, 5-oxo- \$\$ DL-Pyroglutamic acid \$\$ 5-Oxoproline # \$\$

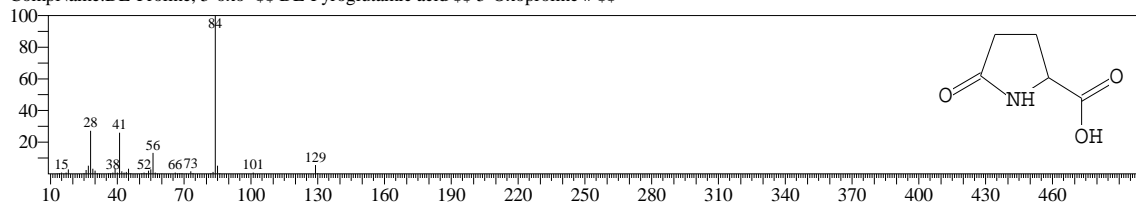

Hit#5 Entry:12419 Library:NIST08.LIB

SI:92 Formula:C7H13NO2 CAS:64749-67-3 MolWeight:143 RetIndex:1099

CompName:2-Pyrrolidinone, 5-(ethoxymethyl)- \$\$ 5-(Ethoxymethyl)-2-pyrrolidinone # \$\$

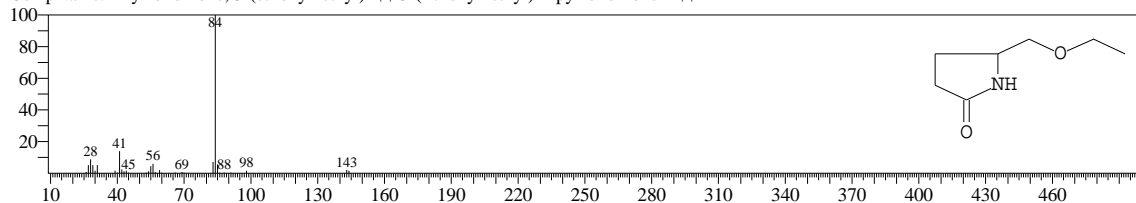

<< Target >>

Line#5 R.Time:21.100(Scan#:3521) MassPeaks:272

RawMode:Averaged 21.095-21.105(3520-3522) BasePeak:136.05(30394)

BG Mode:Calc. from Peak Group 1 - Event 1

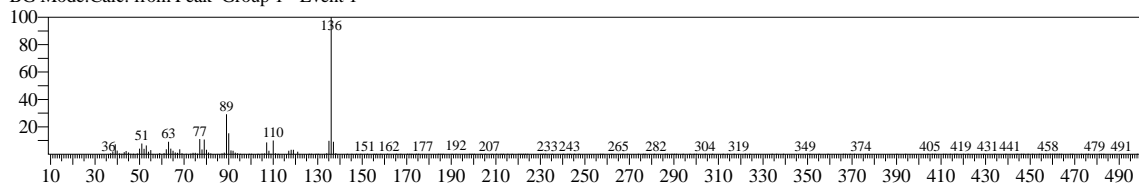

Hit#1 Entry:9492 Library:NIST08.LIB

SI:81 Formula:C<sub>8</sub>H<sub>8</sub>O<sub>2</sub> CAS:698-27-1 MolWeight:136 RetIndex:1316

CompName:Benzaldehyde, 2-hydroxy-4-methyl- \$\$ 2-Hydroxy-4-methylbenzaldehyde \$\$

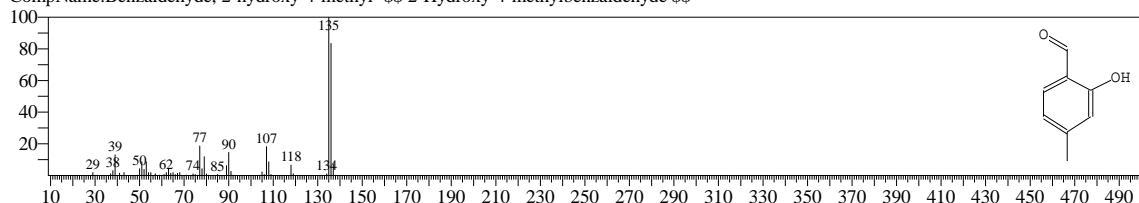

Hit#2 Entry:9495 Library:NIST08.LIB

SI:80 Formula:C<sub>8</sub>H<sub>8</sub>O<sub>2</sub> CAS:18362-36-2 MolWeight:136 RetIndex:1316

CompName:Benzaldehyde, 2-hydroxy-6-methyl- \$\$ 2,6-Cresotaldehyde \$\$ 2-Hydroxy-6-methylbenzaldehyde \$\$

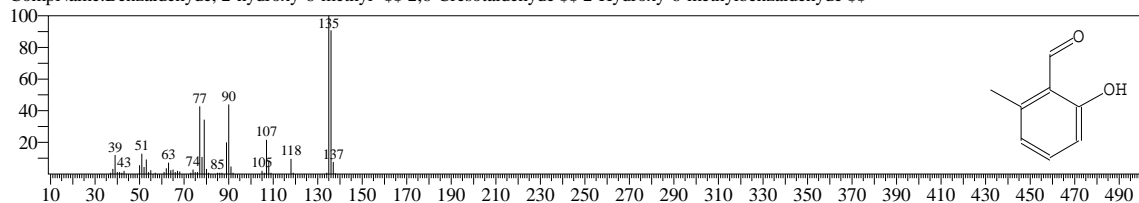

Hit#3 Entry:18374 Library:NIST08s.LIB

SI:79 Formula:C<sub>7</sub>H<sub>6</sub>BrNO<sub>2</sub> CAS:3958-57-4 MolWeight:215 RetIndex:1485

CompName:Benzene, 1-(bromomethyl)-3-nitro- \$\$ m-(Bromomethyl)nitrobenzene \$\$ .alpha.-Bromo-m-nitrotoluene \$\$ m-Nitrobenzyl bromide \$\$ 3-

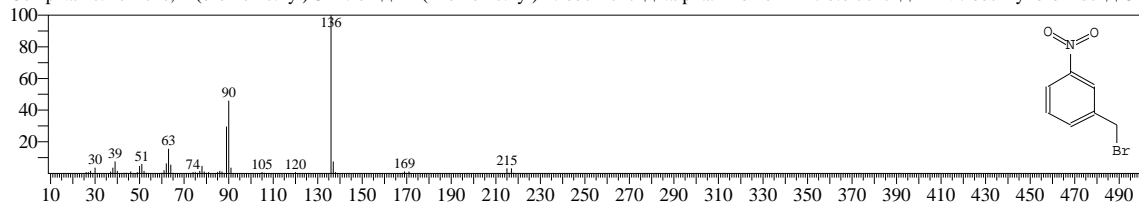

Hit#4 Entry:85070 Library:NIST08.LIB

SI:79 Formula:C<sub>7</sub>H<sub>6</sub>INO<sub>2</sub> CAS:3958-56-3 MolWeight:263 RetIndex:1603

CompName:3-Nitrobenzyl iodide \$\$ Benzene, 1-(iodomethyl)-3-nitro- \$\$ m-Nitrobenzyl iodide \$\$ 1-(Iodomethyl)-3-nitrobenzene # \$\$

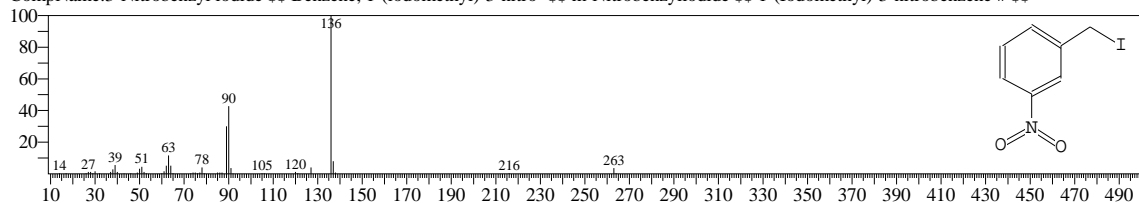

Hit#5 Entry:22564 Library:NIST08.LIB

SI:78 Formula:C<sub>10</sub>H<sub>15</sub>NO CAS:39590-27-7 MolWeight:165 RetIndex:1425

CompName:2-Ethoxyphenethylamine \$\$ 2-(2-Ethoxyphenyl)ethanamine # \$\$

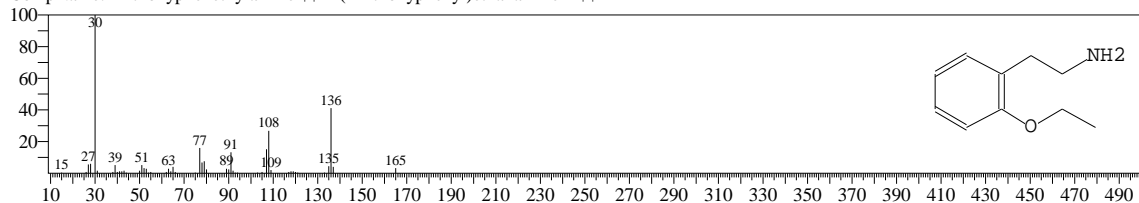

<< Target >>

Line# 6 R.Time: 27.310 (Scan#: 4763) MassPeaks: 301

RawMode: Averaged 27.305-27.315 (4762-4764) BasePeak: 149.05 (27788)

BG Mode: Calc. from Peak Group 1 - Event 1

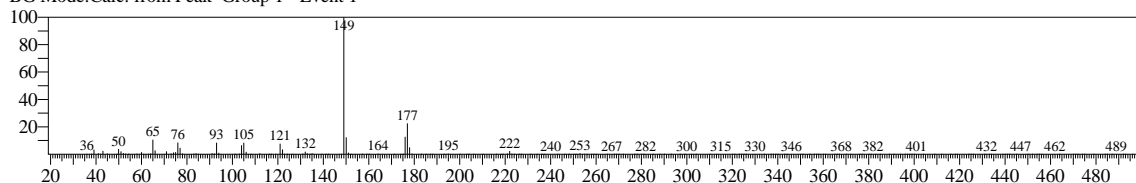

Hit#1 Entry: 1318 Library: FFNSC1.3.lib

SI: 96 Formula: C<sub>21</sub>H<sub>29</sub>N O<sub>3</sub> CAS: 67634-12-2 MolWeight: 343 RetIndex: 1589

CompName: Benzoic acid -2-[[[4-(4-hydroxy-4-methylpentyl)-, 3-cyclohexen-1-yl]methylene]amino]-, methyl-> ester

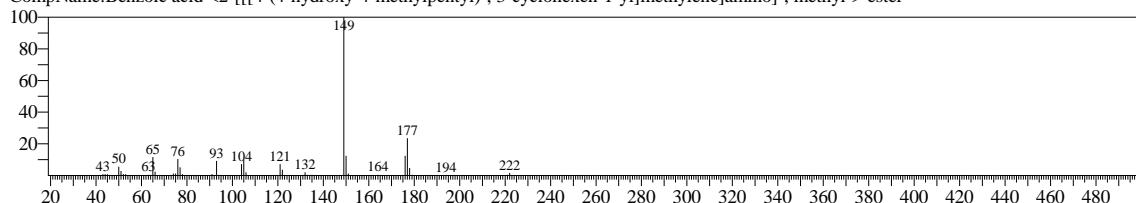

Hit#2 Entry: 19021 Library: NIST08s.LIB

SI: 96 Formula: C<sub>12</sub>H<sub>14</sub>O<sub>4</sub> CAS: 84-66-2 MolWeight: 222 RetIndex: 1639

CompName: Diethyl Phthalate \$1,2-Benzenedicarboxylic acid, diethyl ester\$ Phthalic acid, diethyl ester \$o\$-Benzenedicarboxylic acid, diethyl ester

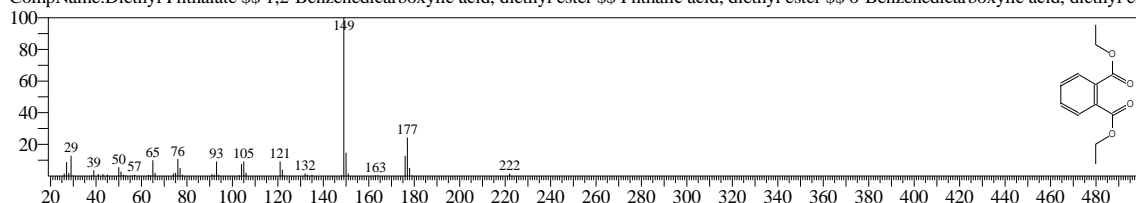

Hit#3 Entry: 66452 Library: NIST08.LIB

SI: 87 Formula: C<sub>13</sub>H<sub>16</sub>O<sub>4</sub> CAS: 0-00-0 MolWeight: 236 RetIndex: 1674

CompName: Phthalic acid, ethyl isopropyl ester

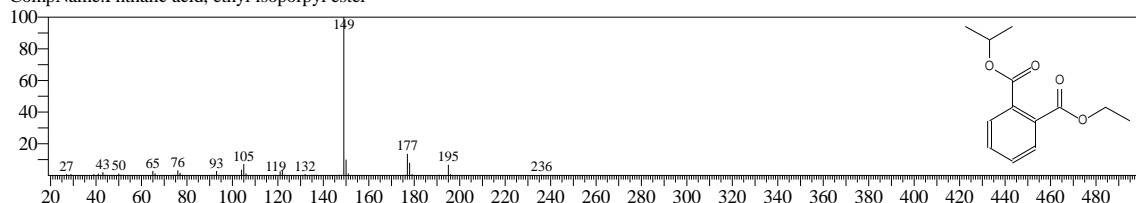

Hit#4 Entry: 86069 Library: NIST08.LIB

SI: 83 Formula: C<sub>15</sub>H<sub>20</sub>O<sub>4</sub> CAS: 0-00-0 MolWeight: 264 RetIndex: 1873

CompName: Phthalic acid, ethyl 2-pentyl ester

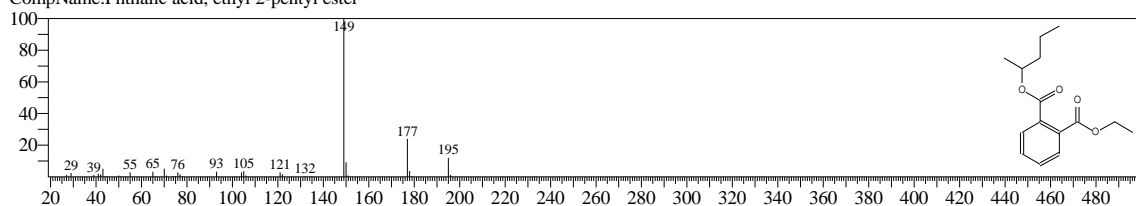

Hit#5 Entry: 65189 Library: NIST08.LIB

SI: 83 Formula: C<sub>13</sub>H<sub>14</sub>O<sub>4</sub> CAS: 33672-94-5 MolWeight: 234 RetIndex: 1729

CompName: Phthalic acid, allyl ethyl ester \$Ethylallylphthalate\$ \$1\$-Allyl 2-ethyl phthalate #

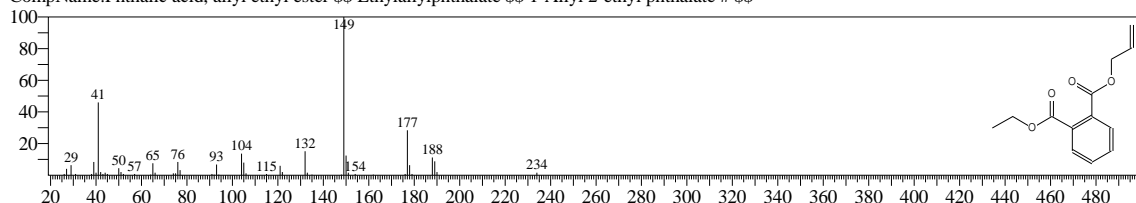

<< Target >>

Line#:7 R.Time:27.450(Scan#:4791) MassPeaks:246

RawMode:Averaged 27.445-27.455(4790-4792) BasePeak:60.00(2321)

BG Mode:Calc. from Peak Group 1 - Event 1

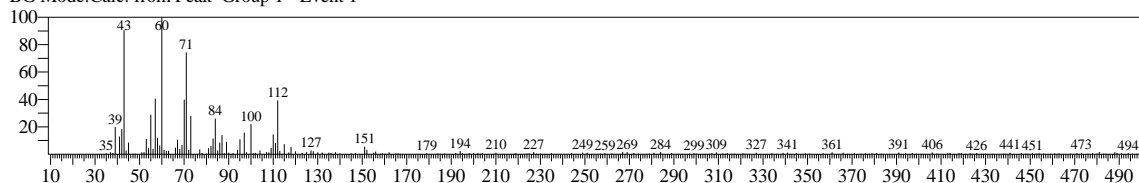

Hit#:1 Entry:42928 Library:NIST08.LIB

SI:77 Formula:C12H24O2 CAS:110-39-4 MolWeight:200 RetIndex:1381

CompName:Butanoic acid, octyl ester \$\$ Butyric acid, octyl ester \$\$ n-Octyl butyrate \$\$ n-Octyl n-butyrate \$\$ Octyl butanoate \$\$ Octyl butyrate \$\$

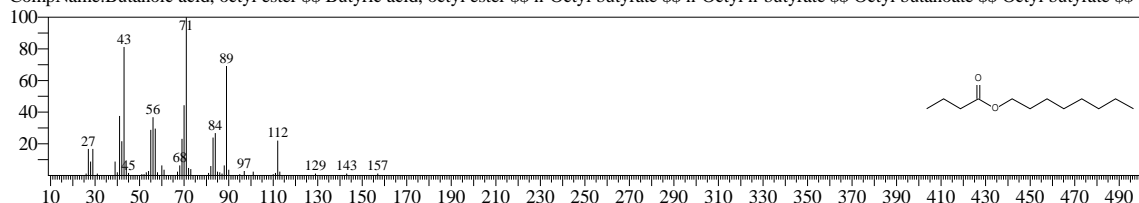

Hit#:2 Entry:37332 Library:NIST08.LIB

SI:76 Formula:C7H12O6 CAS:77-95-2 MolWeight:192 RetIndex:1852

CompName:(1R,3R,4R,5R)-(-)-Quinic acid \$\$ Quinic acid \$\$ D(-)-Quininic acid \$\$ D(-)-Quinic acid \$\$ Cyclohexanecarboxylic acid, 1,3,4,5-tetrahydro

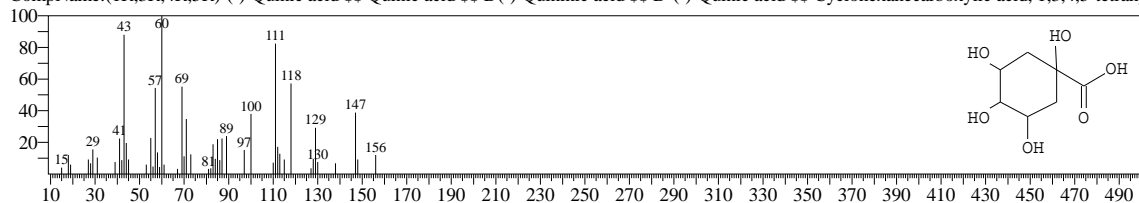

Hit#:3 Entry:16620 Library:NIST08s.LIB

SI:76 Formula:C12H24O2 CAS:25415-84-3 MolWeight:200 RetIndex:1317

CompName:n-Butyric acid 2-ethylhexyl ester \$\$ Butanoic acid, 2-ethylhexyl ester \$\$ 2-Ethylhexyl butyrate # \$\$

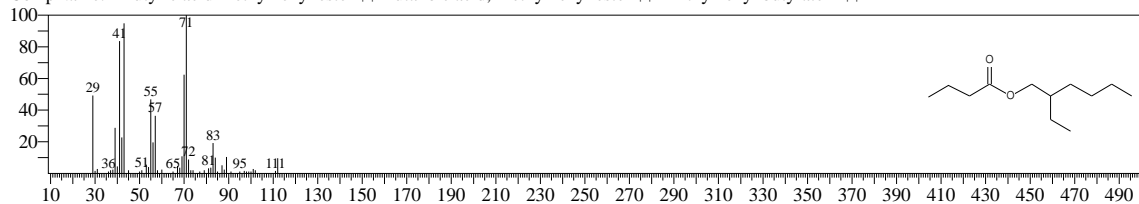

Hit#:4 Entry:14217 Library:NIST08.LIB

SI:76 Formula:C6H12O4 CAS:53585-08-3 MolWeight:148 RetIndex:1472

CompName:1,2,3,5-Cyclohexanetetrol, (1.alpha.,2.beta.,3.alpha.,5.beta.)- \$\$ 1,2,3,5-Cyclohexanetetrol # \$\$

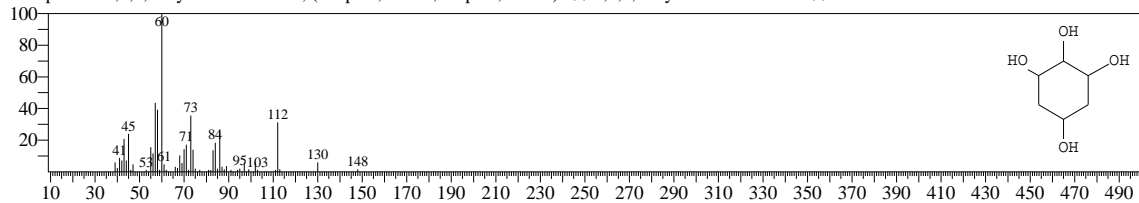

Hit#:5 Entry:12515 Library:NIST08s.LIB

SI:76 Formula:C10H20O2 CAS:334-48-5 MolWeight:172 RetIndex:1372

CompName:n-Decanoic acid \$\$ Decanoic acid \$\$ n-Capric acid \$\$ n-Decoic acid \$\$ n-Decylic acid \$\$ Capric acid \$\$ Caprinic acid \$\$ Caprynic acid

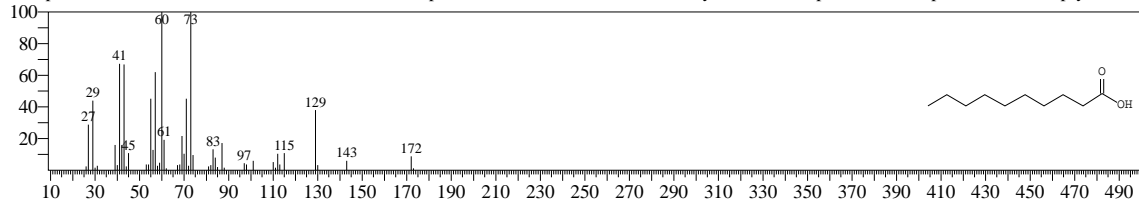

<< Target >>

Line#:8 R.Time:36.210(Scan#:6543) MassPeaks:215

RawMode:Averaged 36.205-36.215(6542-6544) BasePeak:68.05(20424)

BG Mode:Calc. from Peak Group 1 - Event 1

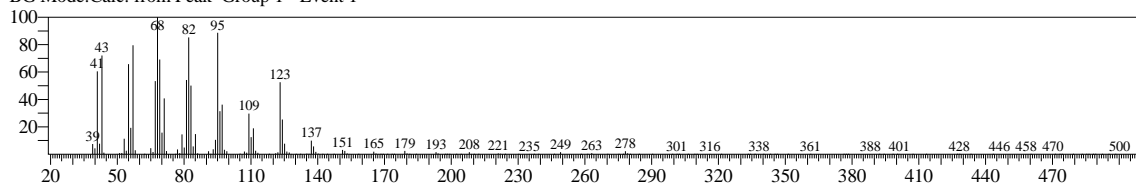

Hit#:1 Entry:908 Library:FFNSC1.3.lib

SI:96 Formula:C20H38 CAS:504-96-1 MolWeight:278 RetIndex:1836

CompName:Neophytadiene

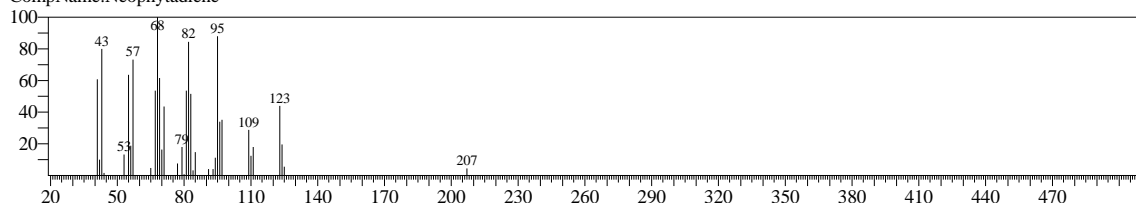

Hit#:2 Entry:109355 Library:NIST08.LIB

SI:92 Formula:C20H40O CAS:102608-53-7 MolWeight:296 RetIndex:2045

CompName:3,7,11,15-Tetramethyl-2-hexadecen-1-ol (2E)-3,7,11,15-Tetramethyl-2-hexadecen-1-ol #

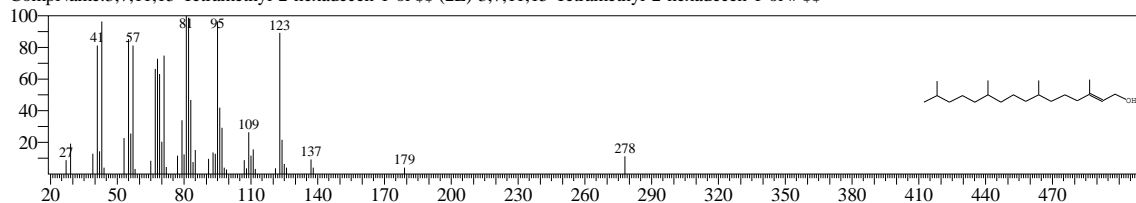

Hit#:3 Entry:60326 Library:NIST08.LIB

SI:88 Formula:C15H30O CAS:2765-11-9 MolWeight:226 RetIndex:1701

CompName:Pentadecanal-

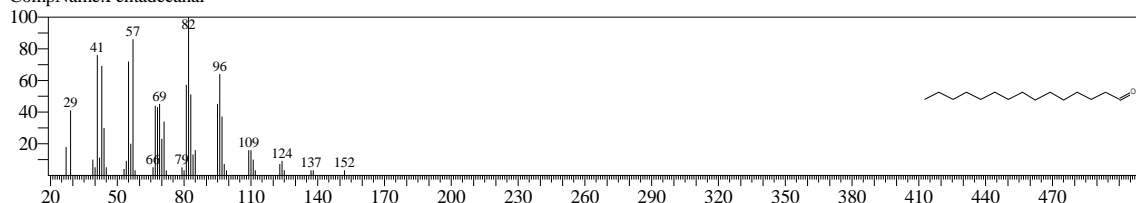

Hit#:4 Entry:96439 Library:NIST08.LIB

SI:88 Formula:C20H38 CAS:71899-38-2 MolWeight:278 RetIndex:2027

CompName:9-Eicosyne 9-Icosyne #

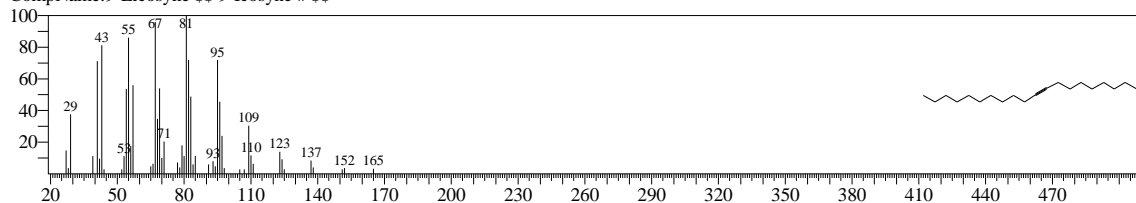

Hit#:5 Entry:22616 Library:NIST08s.LIB

SI:88 Formula:C18H36O CAS:143-28-2 MolWeight:268 RetIndex:2061

CompName:Oleyl Alcohol 9-Octadecen-1-ol, (Z)- 9-cis-Octadecen-1-ol 9-cis-Octadecenyl Alcohol Adol 320 Adol 85 Atalco O

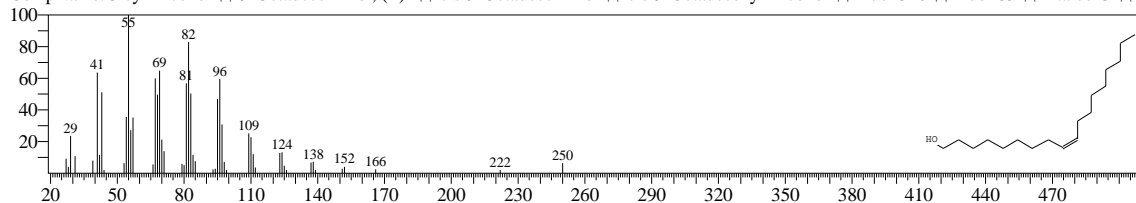

<< Target >>

Line#:9 R.Time:37.075(Scan#:6716) MassPeaks:275

RawMode:Averaged 37.070-37.080(6715-6717) BasePeak:82.10(2600)

BG Mode:Calc. from Peak Group 1 - Event 1

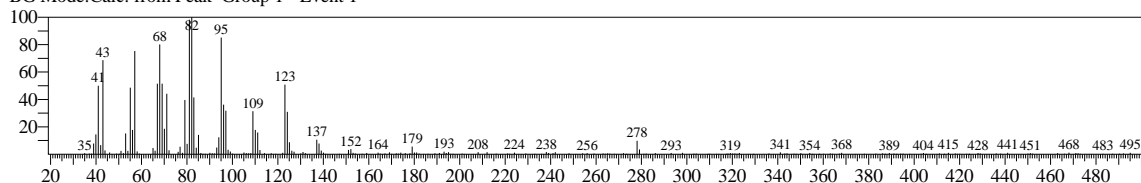

Hit#:1 Entry:109355 Library:NIST08.LIB

SI:92 Formula:C<sub>20</sub>H<sub>40</sub>O CAS:102608-53-7 MolWeight:296 RetIndex:2045

CompName:3,7,11,15-Tetramethyl-2-hexadecen-1-ol (2E)-3,7,11,15-Tetramethyl-2-hexadecen-1-ol #

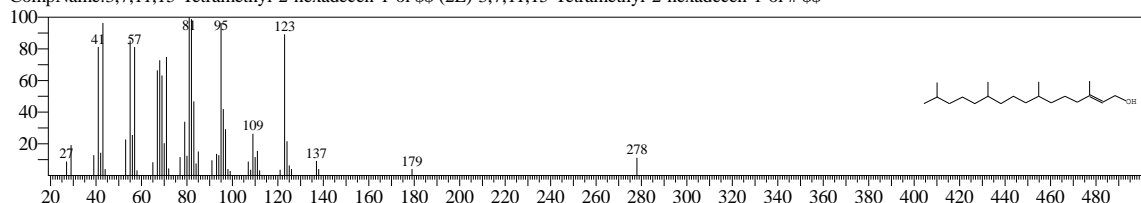

Hit#:2 Entry:908 Library:FFNSC1.3.lib

SI:91 Formula:C<sub>20</sub>H<sub>38</sub> CAS:504-96-1 MolWeight:278 RetIndex:1836

CompName:Neophytadiene

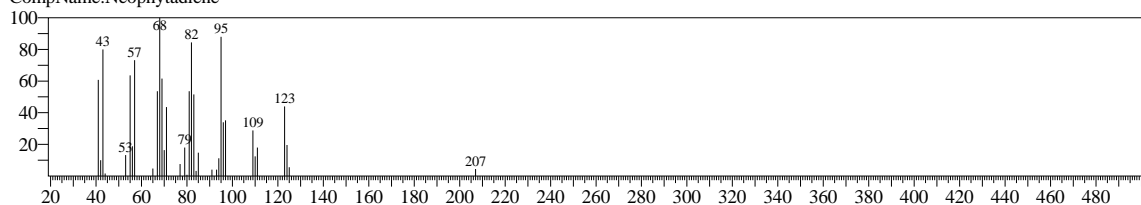

Hit#:3 Entry:96439 Library:NIST08.LIB

SI:87 Formula:C<sub>20</sub>H<sub>38</sub> CAS:71899-38-2 MolWeight:278 RetIndex:2027

CompName:9-Eicosyne 9-Icosyne #

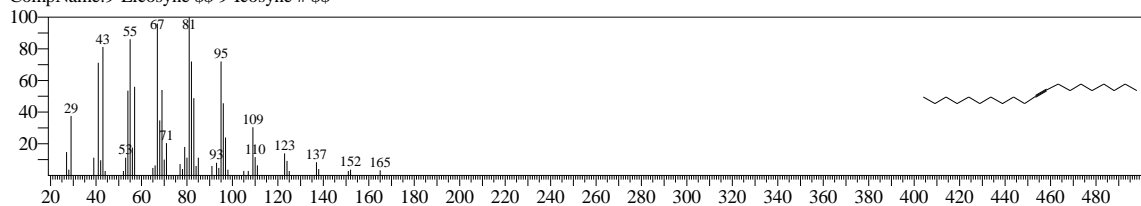

Hit#:4 Entry:89232 Library:NIST08.LIB

SI:87 Formula:C<sub>18</sub>H<sub>36</sub>O CAS:143-28-2 MolWeight:268 RetIndex:2061

CompName:Oleyl Alcohol 9-Octadecen-1-ol, (Z)- 9-Octadecen-1-ol (Z)- 9-Octadecenyl Alcohol Adol 320 Adol 85 Atalco O

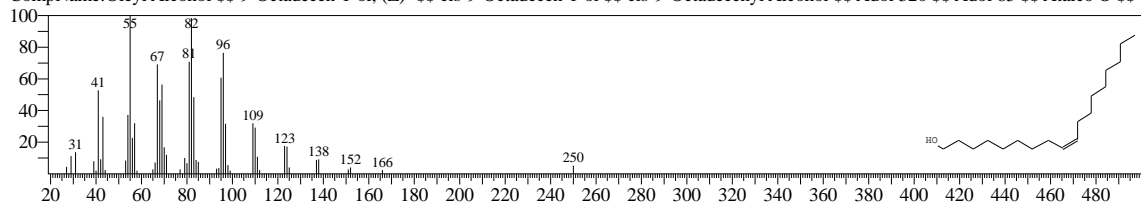

Hit#:5 Entry:96437 Library:NIST08.LIB

SI:87 Formula:C<sub>20</sub>H<sub>38</sub> CAS:0-00-0 MolWeight:278 RetIndex:2007

CompName:1,4-Eicosadiene

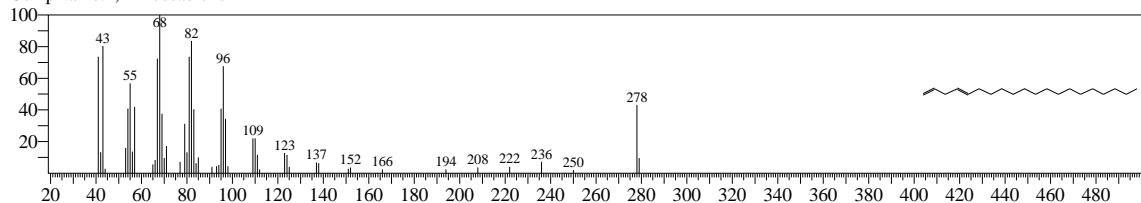

<< Target >>

Line#:10 R.Time:37.695(Scan#:6840) MassPeaks:242

RawMode:Averaged 37.690-37.700(6839-6841) BasePeak:82.10(6340)

BG Mode:Calc. from Peak Group 1 - Event 1

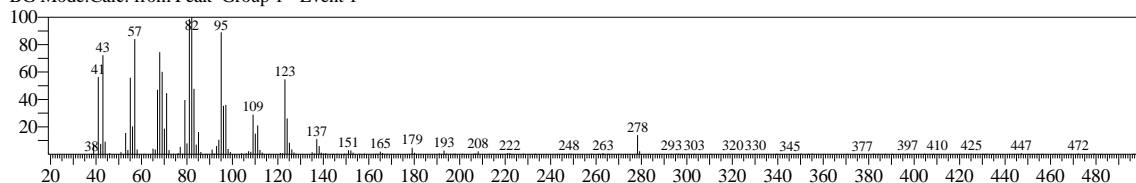

Hit#:1 Entry:109355 Library:NIST08.LIB

SI:94 Formula:C20H40O CAS:102608-53-7 MolWeight:296 RetIndex:2045

CompName:3,7,11,15-Tetramethyl-2-hexadecen-1-ol (2E)-3,7,11,15-Tetramethyl-2-hexadecen-1-ol # \$\$

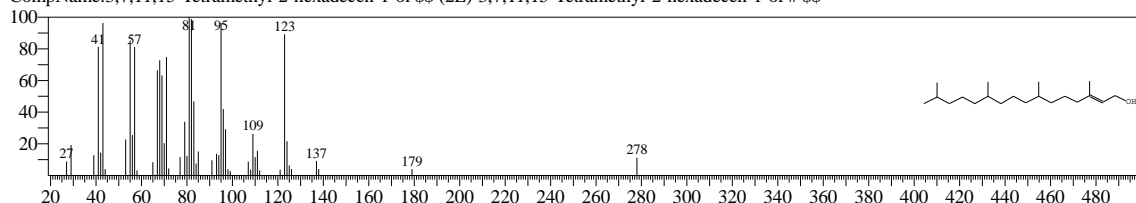

Hit#:2 Entry:908 Library:FFNSC1.3.lib

SI:92 Formula:C20H38 CAS:504-96-1 MolWeight:278 RetIndex:1836

CompName:Neophytadiene

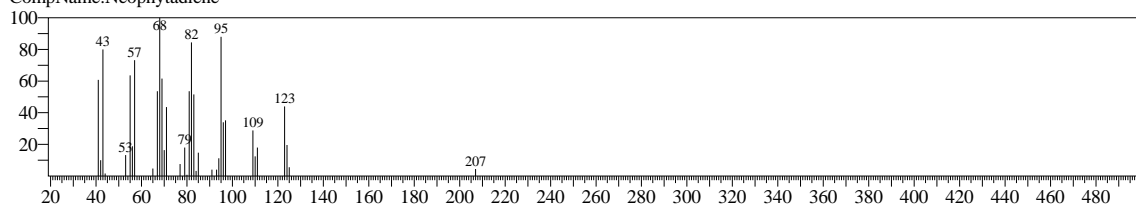

Hit#:3 Entry:96439 Library:NIST08.LIB

SI:88 Formula:C20H38 CAS:71899-38-2 MolWeight:278 RetIndex:2027

CompName:9-Eicosyne 9-Icosyne # \$\$

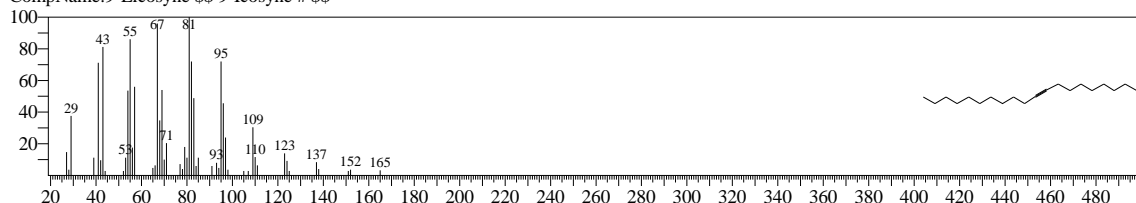

Hit#:4 Entry:60326 Library:NIST08.LIB

SI:88 Formula:C15H30O CAS:2765-11-9 MolWeight:226 RetIndex:1701

CompName:Pentadecanal-

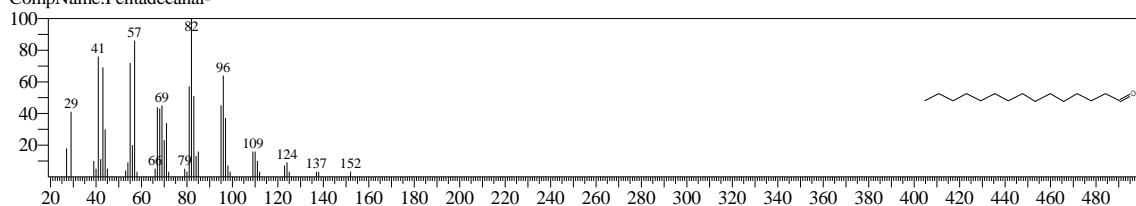

Hit#:5 Entry:86382 Library:NIST08.LIB

SI:88 Formula:C19H36 CAS:35354-38-2 MolWeight:264 RetIndex:1863

CompName:7-Octadecyne, 2-methyl- 2-Methyl-7-octadecyne \$\$

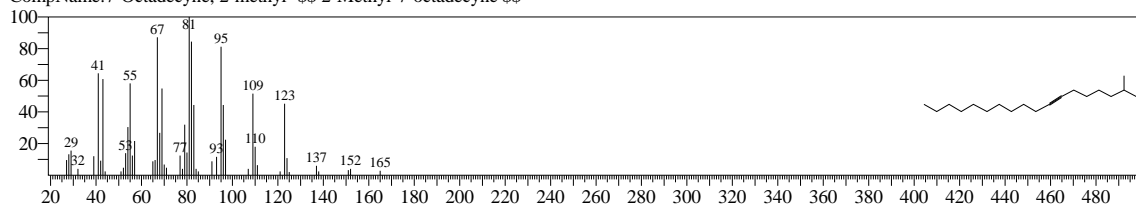

<< Target >>

Line#:11 R.Time:39.240(Scan#:7149) MassPeaks:285

RawMode:Averaged 39.235-39.245(7148-7150) BasePeak:74.00(26649)

BG Mode:Calc. from Peak Group 1 - Event 1

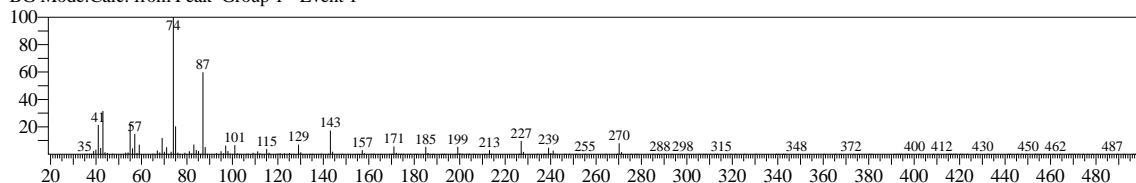

Hit#:1 Entry:587 Library:FFNSC1.3.lib

SI:96 Formula:C17H34O2 CAS:112-39-0 MolWeight:270 RetIndex:1925

CompName:Hexadecanoate <methyl->

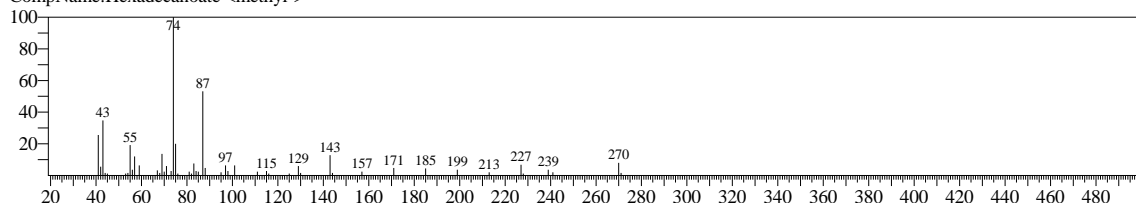

Hit#:2 Entry:90720 Library:NIST08.LIB

SI:92 Formula:C17H34O2 CAS:5129-60-2 MolWeight:270 RetIndex:1814

CompName:Pentadecanoic acid, 14-methyl-, methyl ester \$\$ Methyl 14-methylpentadecanoate # \$\$

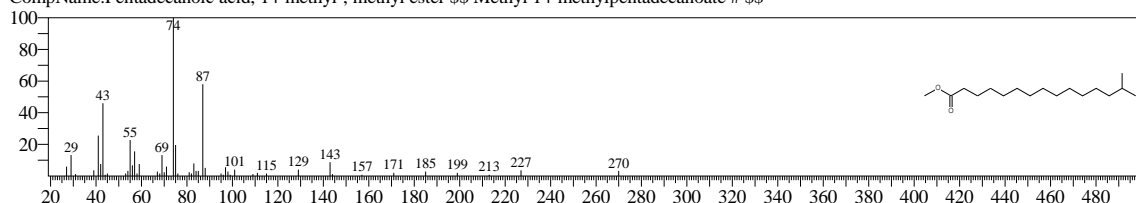

Hit#:3 Entry:80758 Library:NIST08.LIB

SI:92 Formula:C16H32O2 CAS:7132-64-1 MolWeight:256 RetIndex:1779

CompName:Pentadecanoic acid, methyl ester \$\$ Methyl n-pentadecanoate \$\$ Methyl pentadecanoate \$\$ n-Pentadecanoic acid methyl ester \$\$

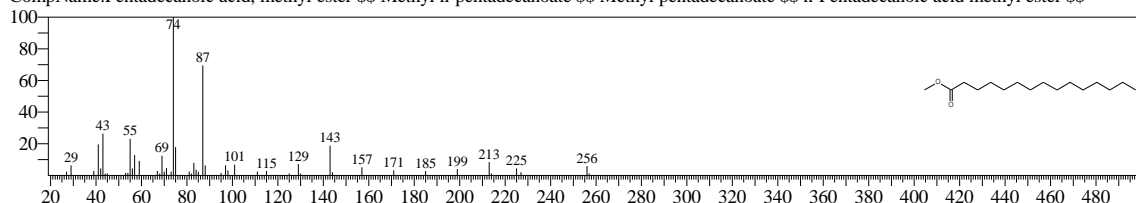

Hit#:4 Entry:23520 Library:NIST08s.LIB

SI:91 Formula:C18H36O2 CAS:1731-92-6 MolWeight:284 RetIndex:1978

CompName:Heptadecanoic acid, methyl ester \$\$ Margaric acid methyl ester \$\$ Methyl heptadecanoate \$\$ Methyl margarate \$\$ n-Heptadecanoic acid

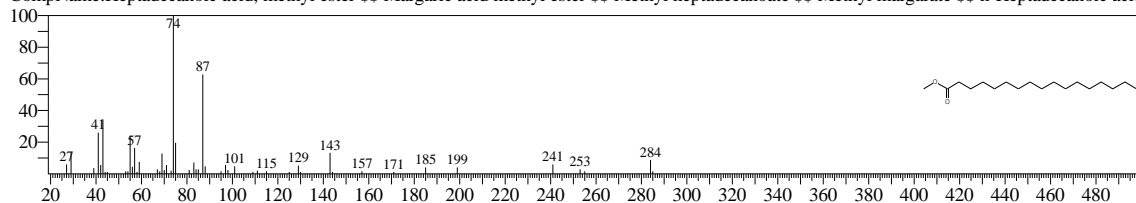

Hit#:5 Entry:61606 Library:NIST08.LIB

SI:91 Formula:C14H28O2 CAS:1731-88-0 MolWeight:228 RetIndex:1580

CompName:Tridecanoic acid, methyl ester \$\$ Methyl tridecanoate \$\$ n-Tridecanoic acid methyl ester \$\$ Methyl ester of tridecanoic acid \$\$

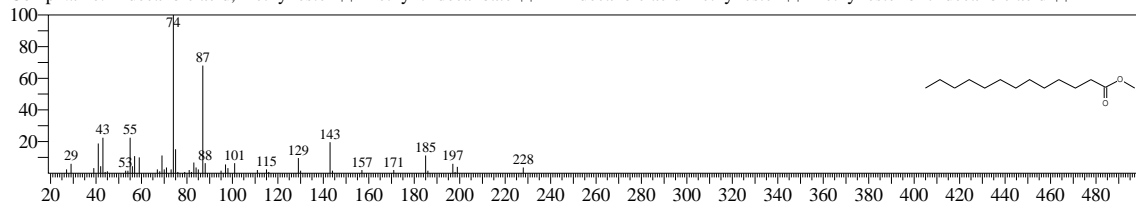

<< Target >>

Line#:12 R.Time:40.565(Scan#:7414) MassPeaks:339

RawMode:Averaged 40.560-40.570(7413-7415) BasePeak:73.00(55942)

BG Mode:Calc. from Peak Group 1 - Event 1

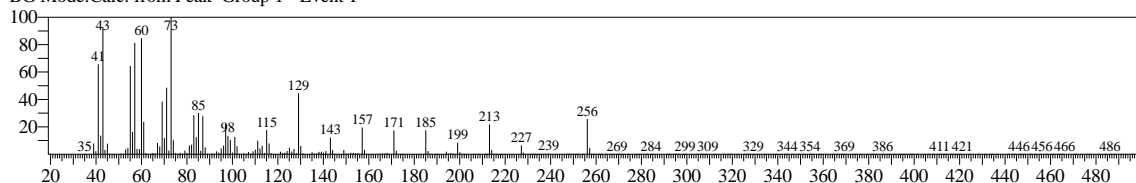

Hit#:1 Entry:626 Library:FFNSC1.3.lib

SI:95 Formula:C16H32O2 CAS:57-10-3 MolWeight:256 RetIndex:1977

CompName:Hexadecanoic acid <n->

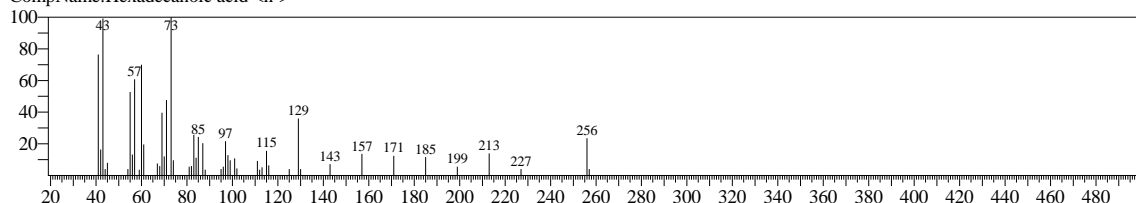

Hit#:2 Entry:20839 Library:NIST08s.LIB

SI:94 Formula:C15H30O2 CAS:1002-84-2 MolWeight:242 RetIndex:1869

CompName:Pentadecanoic acid \$ Pentadecylic acid \$ n-Pentadecanoic acid \$ n-Pentadecylic acid \$

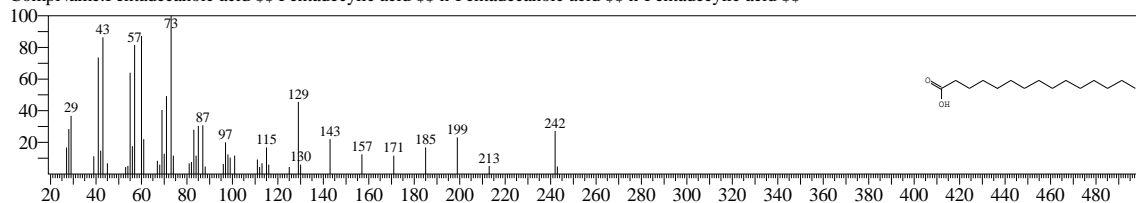

Hit#:3 Entry:189990 Library:NIST08.LIB

SI:92 Formula:C38H68O8 CAS:28474-90-0 MolWeight:652 RetIndex:4765

CompName:l-(+)-Ascorbic acid 2,6-dihexadecanoate

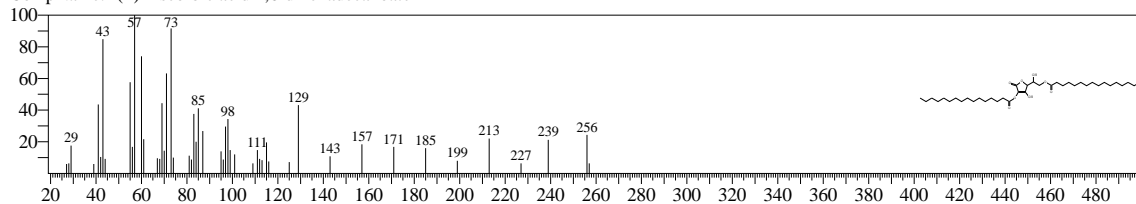

Hit#:4 Entry:100791 Library:NIST08.LIB

SI:91 Formula:C18H36O2 CAS:57-11-4 MolWeight:284 RetIndex:2167

CompName:Octadecanoic acid \$ Stearic acid \$ n-Octadecanoic acid \$ Humko Industrane R \$ Hydrofol Acid 150 \$ Hystrene S-97 \$ Hystrene 7

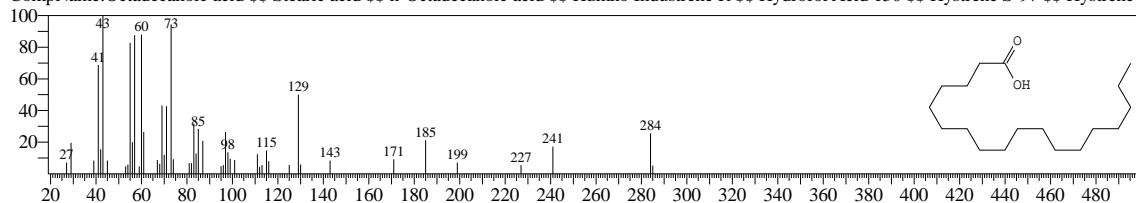

Hit#:5 Entry:61604 Library:NIST08.LIB

SI:91 Formula:C14H28O2 CAS:544-63-8 MolWeight:228 RetIndex:1769

CompName:Tetradecanoic acid \$ Myristic acid \$ n-Tetradecanoic acid \$ n-Tetradecoic acid \$ Neo-Fat 14 \$ Univol U 316S \$ 1-Tridecanecarbo

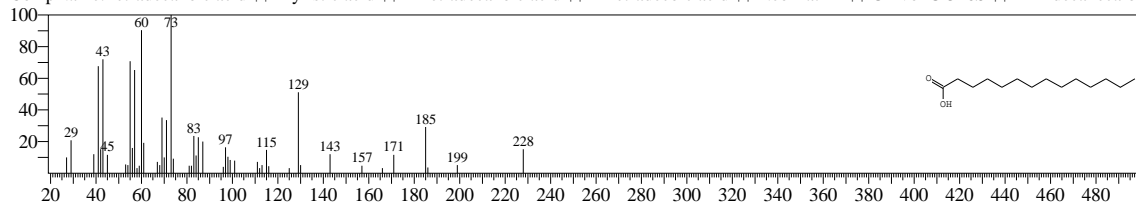

<< Target >>

Line#:13 R.Time:44.335(Scan#:8168) MassPeaks:256

RawMode:Averaged 44.330-44.340(8167-8169) BasePeak:57.05(4548)

BG Mode:Calc. from Peak Group 1 - Event 1

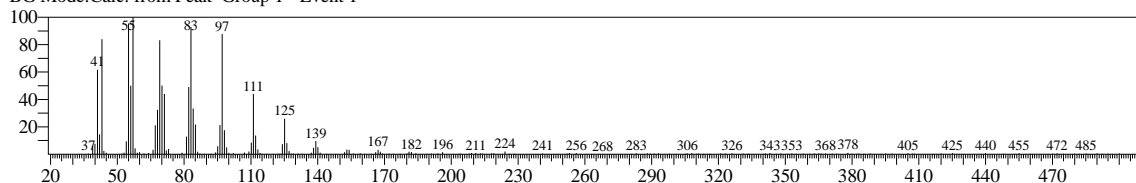

Hit#:1 Entry:100901 Library:NIST08.LIB

SI:97 Formula:C<sub>19</sub>H<sub>40</sub>O CAS:1454-84-8 MolWeight:284 RetIndex:2153

CompName:n-Nonadecanol-1 \$\$ 1-Nonadecanol \$\$ Nonadecanol \$\$ Nonadecan-1-ol \$\$ Nonadecyl alcohol \$\$

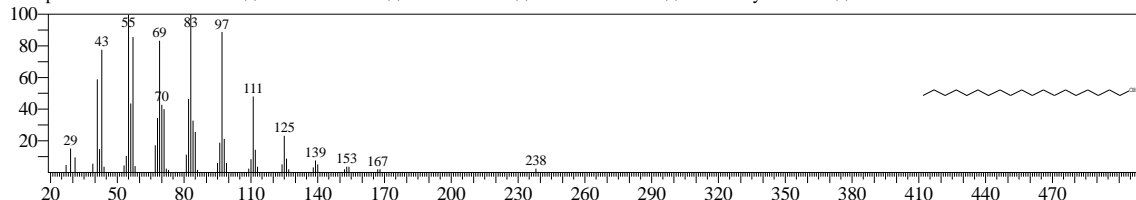

Hit#:2 Entry:25469 Library:NIST08s.LIB

SI:96 Formula:C<sub>22</sub>H<sub>46</sub>O CAS:661-19-8 MolWeight:326 RetIndex:2451

CompName:Behenic alcohol \$\$ 1-Docosanol \$\$ Docosyl alcohol \$\$ Docosanol(1) \$\$ Cachalot BE-22 \$\$ Dehydag wax 22 (lanette) \$\$ Emery 3304 S

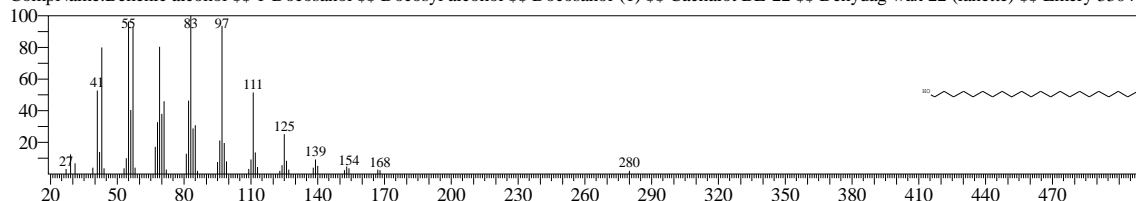

Hit#:3 Entry:1037 Library:FFNSC1.3.lib

SI:96 Formula:C<sub>17</sub>H<sub>36</sub>O CAS:1454-85-9 MolWeight:256 RetIndex:1981

CompName:Heptadecanol <n->

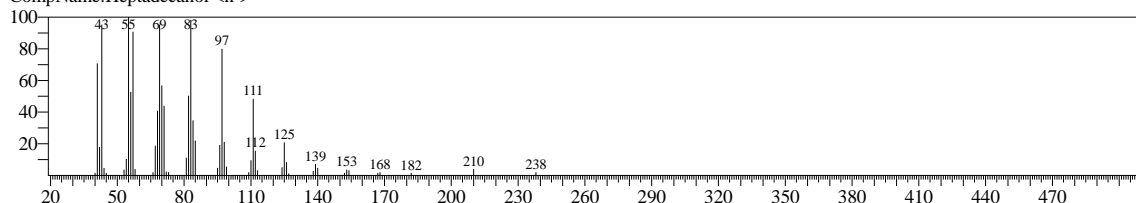

Hit#:4 Entry:22774 Library:NIST08s.LIB

SI:96 Formula:C<sub>18</sub>H<sub>38</sub>O CAS:112-92-5 MolWeight:270 RetIndex:2053

CompName:1-Octadecanol \$\$ n-Octadecanol \$\$ n-Octadecyl alcohol \$\$ n-1-Octadecanol \$\$ Aldol 62 \$\$ Alfol 18 \$\$ Atalco S \$\$ Cachalot S-43 \$\$ C

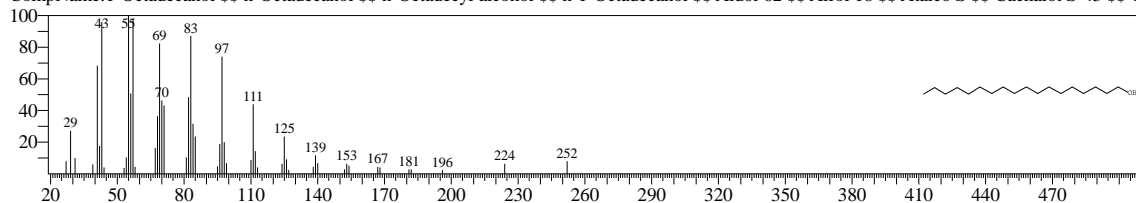

Hit#:5 Entry:147498 Library:NIST08.LIB

SI:96 Formula:C<sub>24</sub>H<sub>50</sub>O CAS:506-51-4 MolWeight:354 RetIndex:2650

CompName:n-Tetracosanol-1 \$\$ Lignoceric alcohol \$\$ Lignoceryl alcohol \$\$ 1-Tetracosanol \$\$ Tetracosan-1-ol \$\$ Tetracosyl alcohol \$\$ Lignoceryl

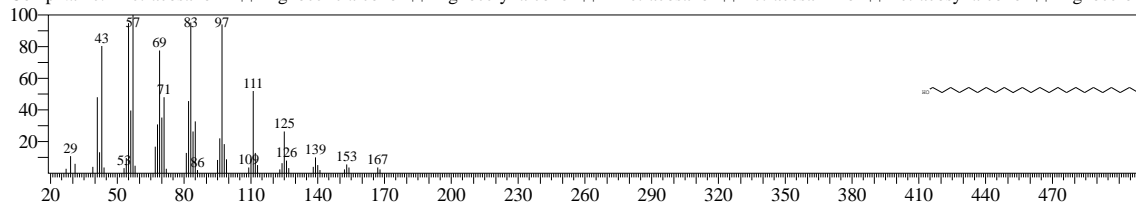

<< Target >>

Line#:14 R.Time:44.710(Scan#:8243) MassPeaks:298

RawMode:Averaged 44.705-44.715(8242-8244) BasePeak:67.05(2268)

BG Mode:Calc. from Peak Group 1 - Event 1

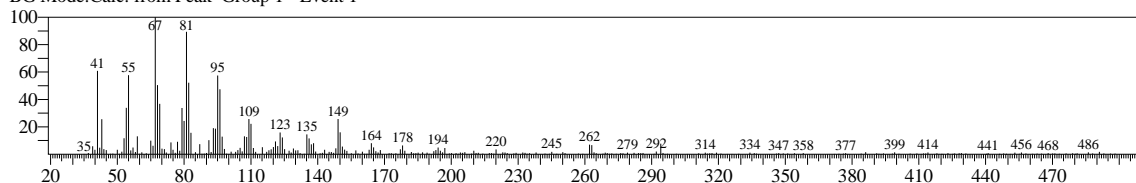

Hit#:1 Entry:24061 Library:NIST08s.LIB

SI:95 Formula:C19H34O2 CAS:112-63-0 MolWeight:294 RetIndex:2093

CompName:9,12-Octadecadienoic acid (Z,Z)-, methyl ester \$\$ Linoleic acid, methyl ester \$\$ Methyl cis,cis-9,12-octadecadienoate \$\$ Methyl linoleat

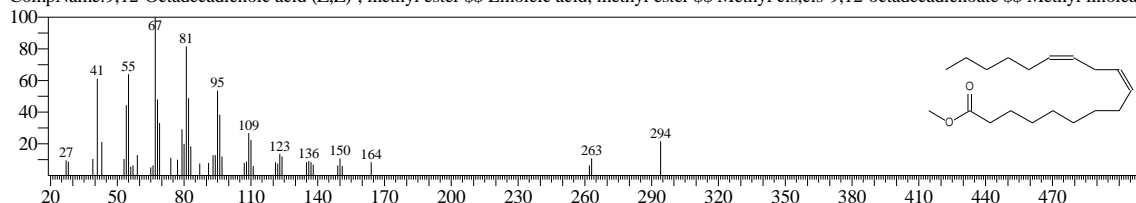

Hit#:2 Entry:107898 Library:NIST08.LIB

SI:93 Formula:C19H34O2 CAS:2462-85-3 MolWeight:294 RetIndex:2093

CompName:9,12-Octadecadienoic acid, methyl ester \$\$ Methyl (9E,12E)-9,12-octadecadienoate # \$\$

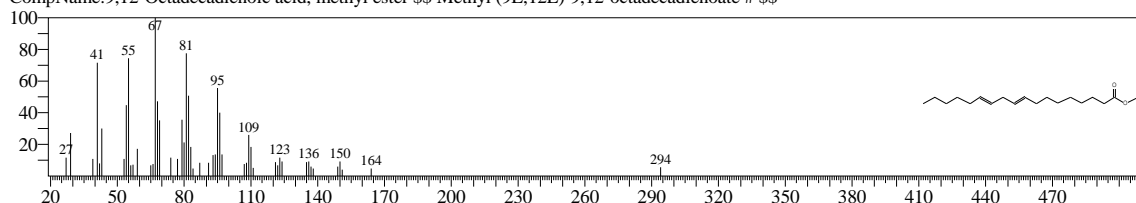

Hit#:3 Entry:107890 Library:NIST08.LIB

SI:93 Formula:C19H34O2 CAS:56599-58-7 MolWeight:294 RetIndex:2093

CompName:8,11-Octadecadienoic acid, methyl ester \$\$ Methyl (8E,11E)-8,11-octadecadienoate # \$\$

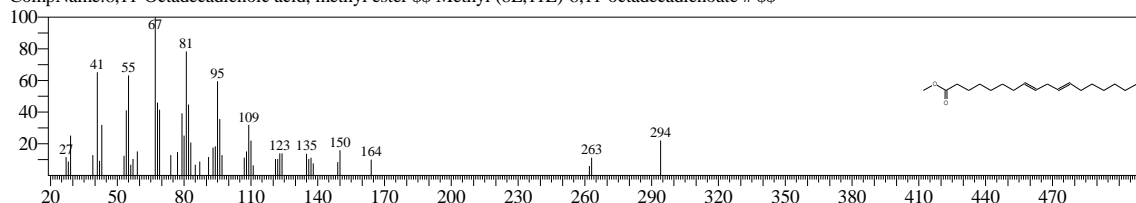

Hit#:4 Entry:107897 Library:NIST08.LIB

SI:92 Formula:C19H34O2 CAS:56554-62-2 MolWeight:294 RetIndex:2093

CompName:10,13-Octadecadienoic acid, methyl ester \$\$ Methyl (10E,13E)-10,13-octadecadienoate # \$\$

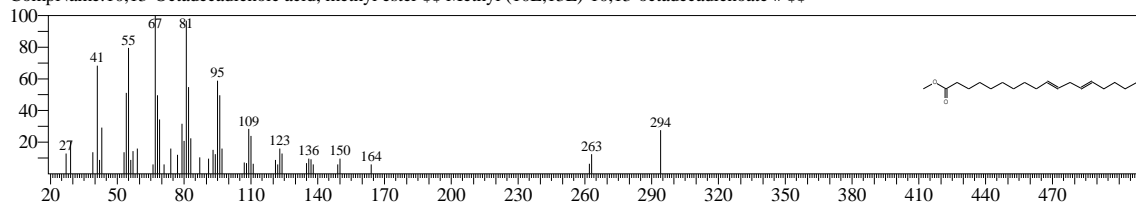

Hit#:5 Entry:127499 Library:NIST08.LIB

SI:91 Formula:C21H38O2 CAS:0-00-0 MolWeight:322 RetIndex:2292

CompName:cis-11,14-Eicosadienoic acid, methyl ester

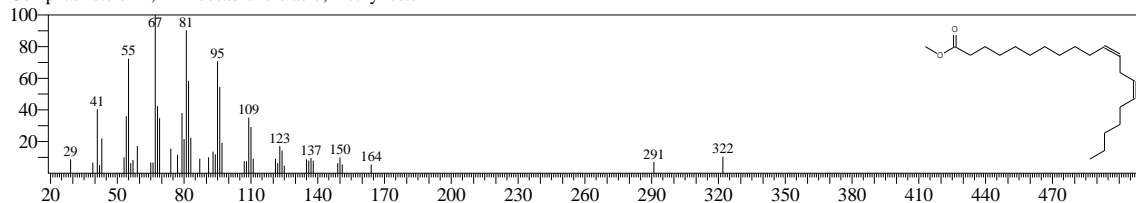

<< Target >>

Line#:15 R.Time:44.900(Scan#:8281) MassPeaks:327

RawMode:Averaged 44.895-44.905(8280-8282) BasePeak:55.05(4410)

BG Mode:Calc. from Peak Group 1 - Event 1

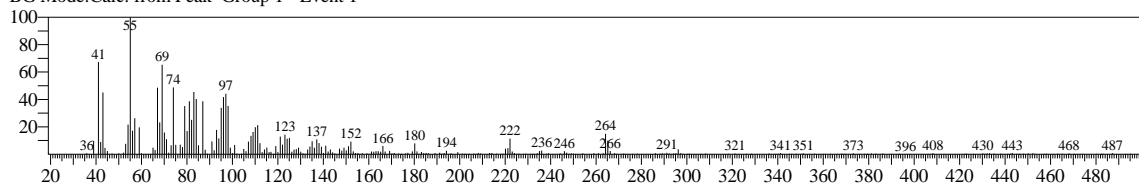

Hit#:1 Entry:24160 Library:NIST08s.LIB

SI:90 Formula:C19H36O2 CAS:1937-62-8 MolWeight:296 RetIndex:2085

CompName:9-Octadecenoic acid, methyl ester, (E)- \$\$ Elaidic acid, methyl ester \$\$ Methyl elaidate \$\$ Methyl trans-9-octadecenoate \$\$ (E)-9-Octadecenoic acid, methyl ester

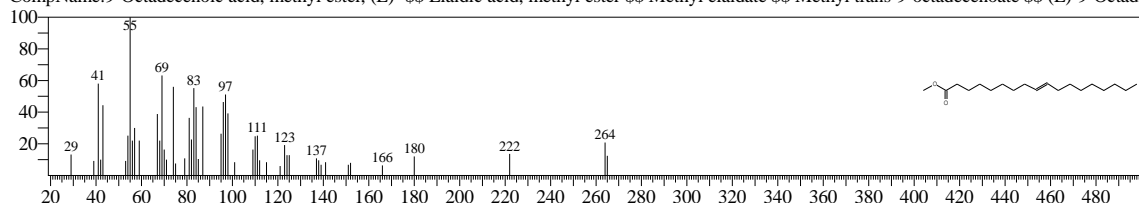

Hit#:2 Entry:24158 Library:NIST08s.LIB

SI:90 Formula:C19H36O2 CAS:112-62-9 MolWeight:296 RetIndex:2085

CompName:9-Octadecenoic acid (Z)-, methyl ester \$\$ Oleic acid, methyl ester \$\$ Emery oleic acid ester 2301 \$\$ Methyl cis-9-octadecenoate \$\$ Methyl (Z)-9-octadecenoate

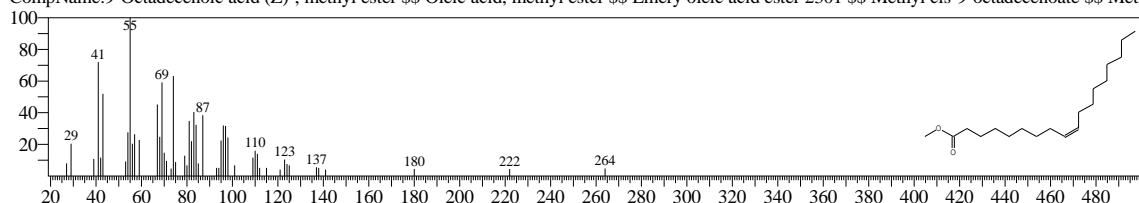

Hit#:3 Entry:24161 Library:NIST08s.LIB

SI:89 Formula:C19H36O2 CAS:52380-33-3 MolWeight:296 RetIndex:2085

CompName:11-Octadecenoic acid, methyl ester \$\$ Methyl 11-octadecenoate \$\$ Octadec-11-enoic acid, methyl ester \$\$ Methyl (11E)-11-octadecenoate

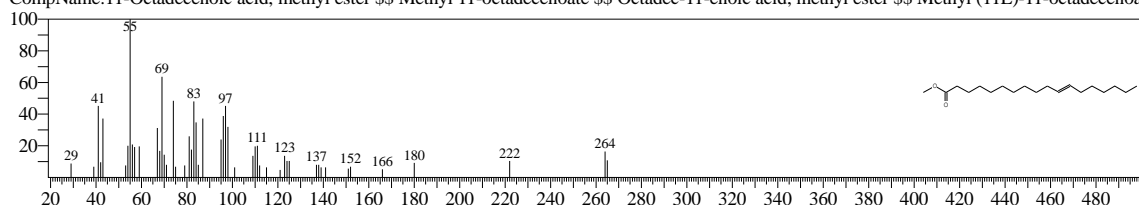

Hit#:4 Entry:109239 Library:NIST08s.LIB

SI:89 Formula:C19H36O2 CAS:2345-29-1 MolWeight:296 RetIndex:2085

CompName:8-Octadecenoic acid, methyl ester \$\$ Methyl (8E)-8-octadecenoate # \$\$

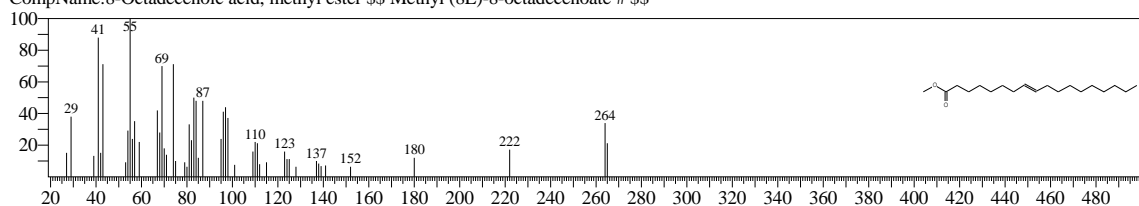

Hit#:5 Entry:109242 Library:NIST08s.LIB

SI:89 Formula:C19H36O2 CAS:57396-98-2 MolWeight:296 RetIndex:2085

CompName:7-Octadecenoic acid, methyl ester \$\$ Methyl (7E)-7-octadecenoate # \$\$

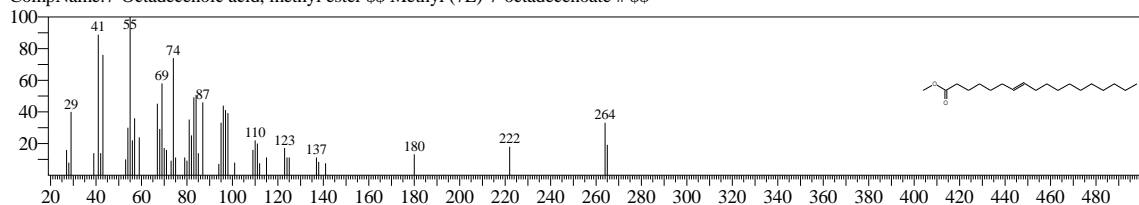

<< Target >>

Line#:16 R.Time:45.280(Scan#:8357) MassPeaks:306

RawMode:Averaged 45.275-45.285(8356-8358) BasePeak:71.05(43727)

BG Mode:Calc. from Peak Group 1 - Event 1

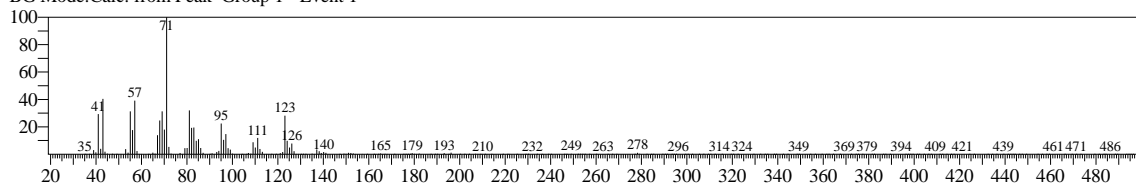

Hit#:1 Entry:421 Library:FFNSC1.3.lib

SI:96 Formula:C20H40O CAS:253686-88-3 MolWeight:296 RetIndex:2106

CompName:Phytol

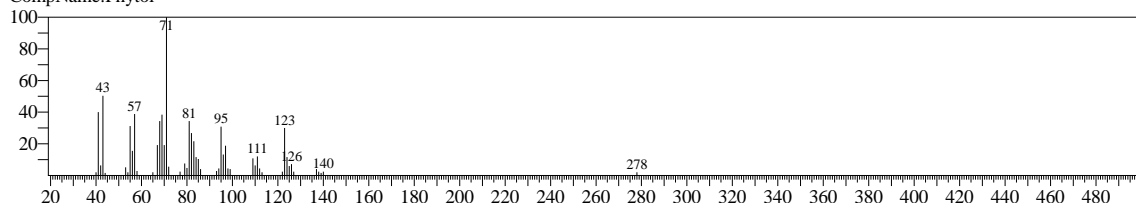

Hit#:2 Entry:24173 Library:NIST08s.LIB

SI:96 Formula:C20H40O CAS:150-86-7 MolWeight:296 RetIndex:2045

CompName:Phytol \$\$ 2-Hexadecen-1-ol, 3,7,11,15-tetramethyl-, [R-[R\*,R\*-(E)]]- \$\$ trans-Phytol \$\$ 3,7,11,15-Tetramethyl-2-hexadecen-1-ol \$\$ (2E

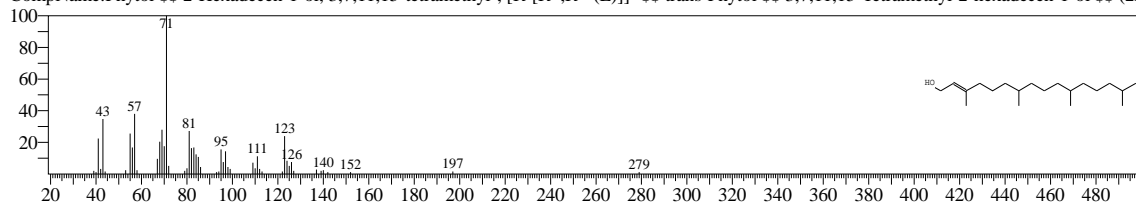

Hit#:3 Entry:18476 Library:NIST08.LIB

SI:88 Formula:C10H20O CAS:26489-01-0 MolWeight:156 RetIndex:1179

CompName:6-Octen-1-ol, 3,7-dimethyl-, (+/-)- \$\$ (+/-)-Citronellol \$\$ DL-Citronellol \$\$ Dihydrogeraniol \$\$ 6-Octen-1-ol, 3,7-dimethyl-, (+/-)- \$\$

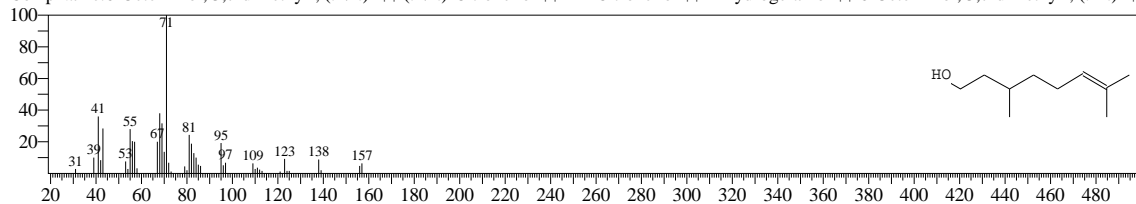

Hit#:4 Entry:18478 Library:NIST08.LIB

SI:88 Formula:C10H20O CAS:23283-97-8 MolWeight:156 RetIndex:1164

CompName:Cyclohexanol, 5-methyl-2-(1-methylethyl)-, [1S-(1.alpha.,2.beta.,5.beta.)]- \$\$ (1S,2R,5R)-(+)-Isomenthol \$\$ 2-Isopropyl-5-methylcyclo

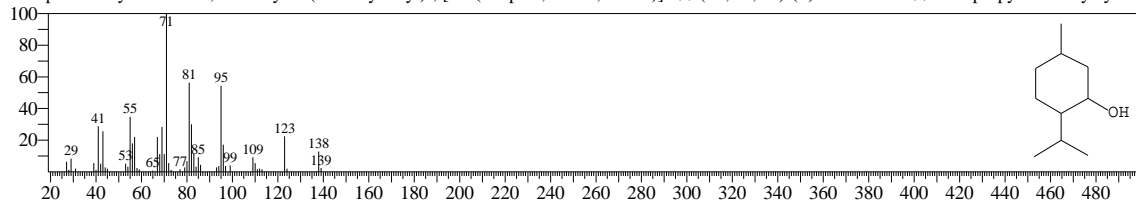

Hit#:5 Entry:9969 Library:NIST08s.LIB

SI:88 Formula:C10H20O CAS:490-99-3 MolWeight:156 RetIndex:1164

CompName:Cyclohexanol, 5-methyl-2-(1-methylethyl)-, (1.alpha.,2.beta.,5.beta.)- \$\$ Menthol, trans-1,3,cis-1,4- \$\$ Isomenthol \$\$ 2-Isopropyl-5-met

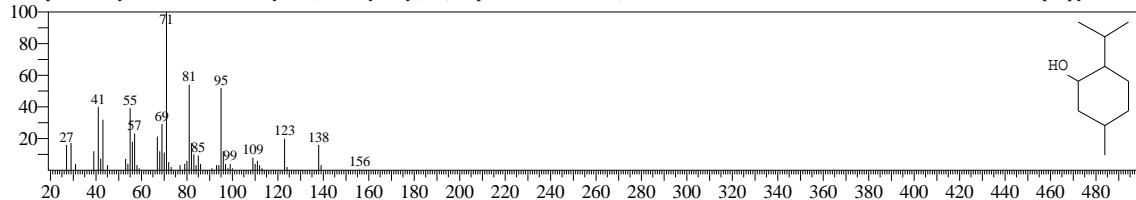

<< Target >>

Line#:17 R.Time:46.140(Scan#:8529) MassPeaks:304

RawMode:Averaged 46.135-46.145(8528-8530) BasePeak:55.05(13504)

BG Mode:Calc. from Peak Group 1 - Event 1

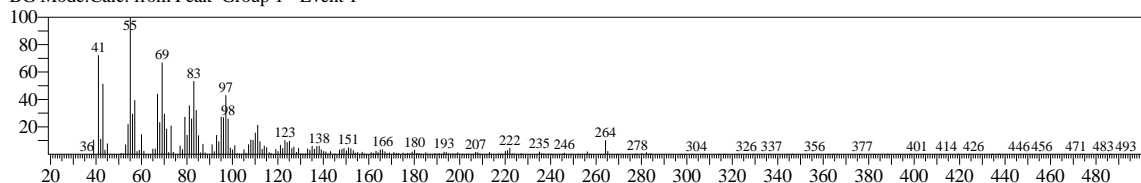

Hit#:1 Entry:23408 Library:NIST08s.LIB

SI:93 Formula:C18H34O2 CAS:112-80-1 MolWeight:282 RetIndex:2175

CompName:Oleic Acid \$ 9-Octadecenoic acid (Z)- \$ .delta.(Sup9)-cis-Oleic acid \$ cis-.delta.(Sup9)-Octadecenoic acid \$ cis-Oleic Acid \$ cis-9-

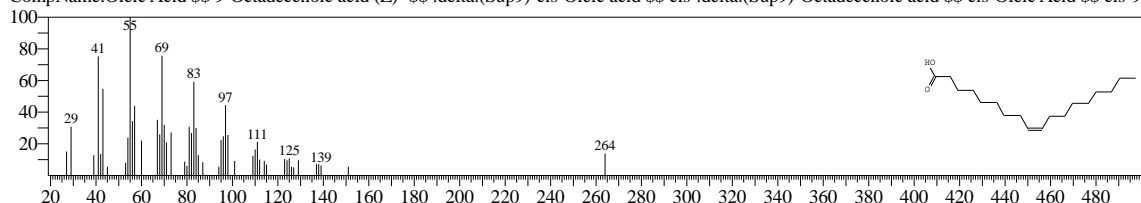

Hit#:2 Entry:99164 Library:NIST08.LIB

SI:92 Formula:C18H34O2 CAS:506-17-2 MolWeight:282 RetIndex:2175

CompName:cis-Vaccenic acid

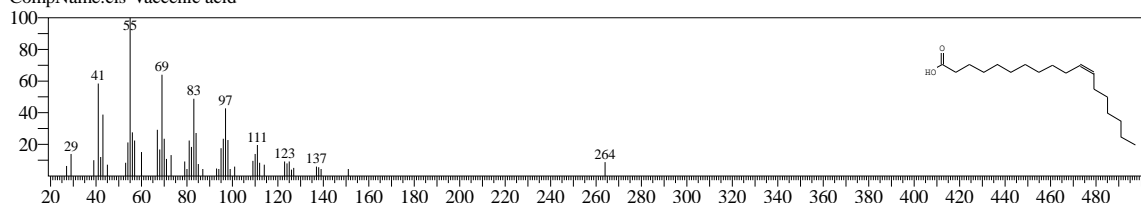

Hit#:3 Entry:109246 Library:NIST08.LIB

SI:91 Formula:C19H36O2 CAS:73033-09-7 MolWeight:296 RetIndex:2274

CompName:cis-10-Nonadecenoic acid

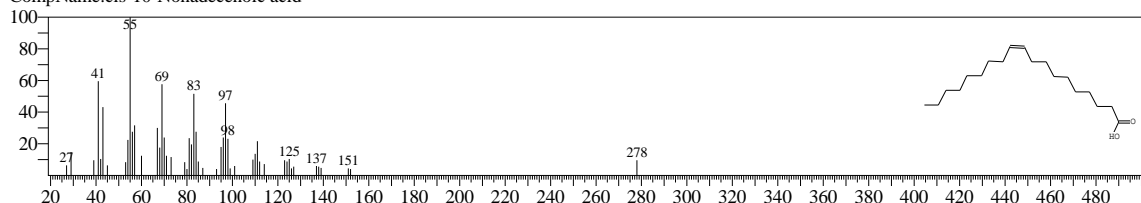

Hit#:4 Entry:119260 Library:NIST08.LIB

SI:90 Formula:C20H38O2 CAS:5561-99-9 MolWeight:310 RetIndex:2374

CompName:cis-11-Eicosenoic acid

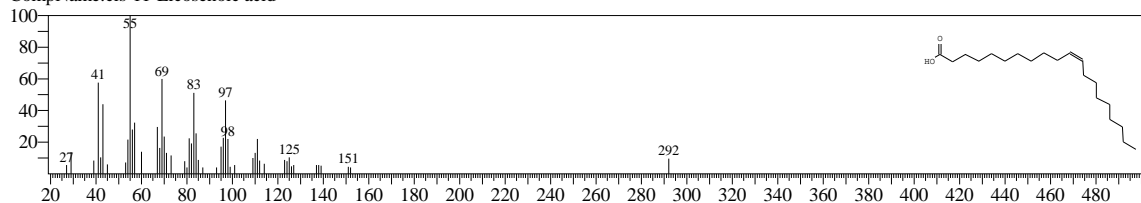

Hit#:5 Entry:99154 Library:NIST08.LIB

SI:90 Formula:C18H34O2 CAS:593-39-5 MolWeight:282 RetIndex:2175

CompName:6-Octadecenoic acid, (Z)- \$ (6Z)-6-Octadecenoic acid # \$ \$

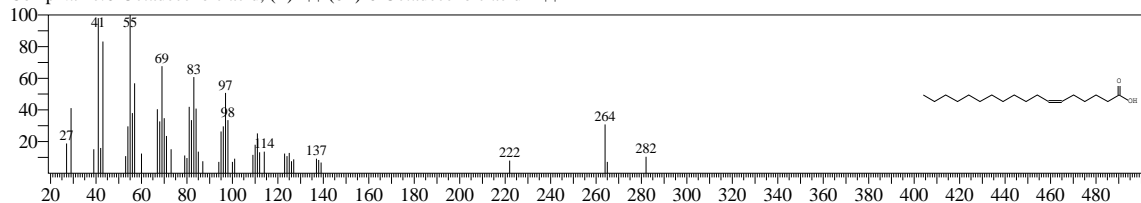

<< Target >>

Line#18 R.Time:56.625(Scan#:10626) MassPeaks:322

RawMode:Averaged 56.620-56.630(10625-10627) BasePeak:98.05(11760)

BG Mode:Calc. from Peak Group 1 - Event 1

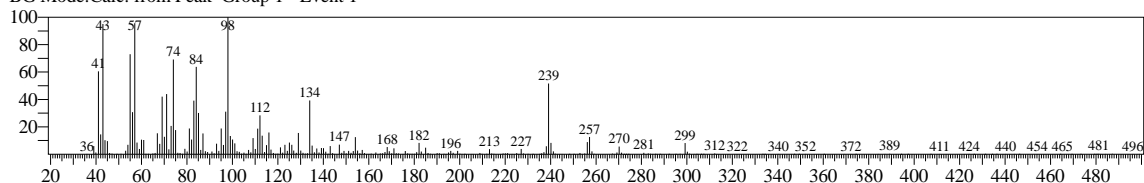

Hit#1 Entry:132705 Library:NIST08.LIB

SI:91 Formula:C19H38O4 CAS:23470-00-0 MolWeight:330 RetIndex:2498

CompName:Hexadecanoic acid, 2-hydroxy-1-(hydroxymethyl)ethyl ester \$ \$ Palmitin, 2-mono- \$ \$ Palmitic acid .beta.-monoglyceride \$ \$ 2-Hexadecar

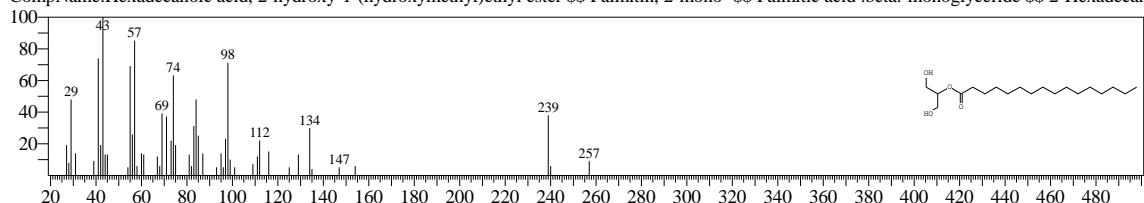

Hit#2 Entry:149479 Library:NIST08.LIB

SI:88 Formula:C21H42O4 CAS:123-94-4 MolWeight:358 RetIndex:2681

CompName:Octadecanoic acid, 2,3-dihydroxypropyl ester \$ \$ Stearin, 1-mono- \$ \$ .alpha.-Monostearin \$ \$ Aldo MSD \$ \$ Aldo MSLG \$ \$ Aldo 33 \$ \$

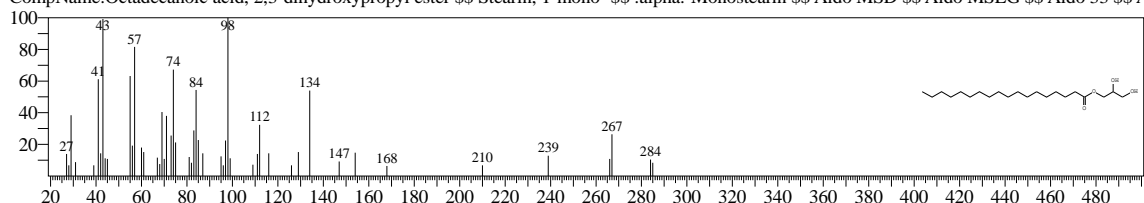

Hit#3 Entry:132706 Library:NIST08.LIB

SI:85 Formula:C19H38O4 CAS:542-44-9 MolWeight:330 RetIndex:2482

CompName:Hexadecanoic acid, 2,3-dihydroxypropyl ester \$ \$ Palmitin, 1-mono- \$ \$ .alpha.-Monopalmitin \$ \$ Glycerol 1-monopalmitate \$ \$ Glycerol 1

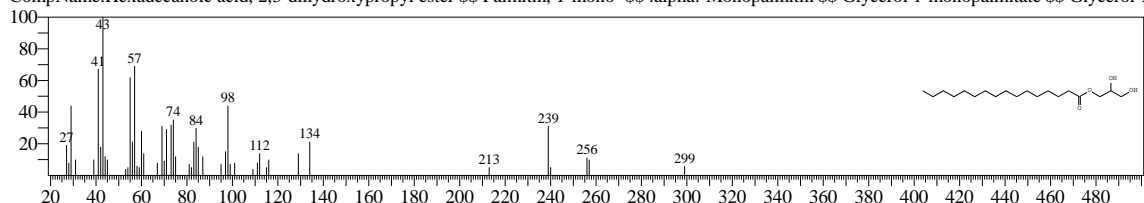

Hit#4 Entry:123373 Library:NIST08.LIB

SI:85 Formula:C18H36O4 CAS:98863-01-5 MolWeight:316 RetIndex:2399

CompName:Pentadecanoic acid, 2-hydroxy-1-(hydroxymethyl)ethyl ester \$ \$ 2-Hydroxy-1-(hydroxymethyl)ethyl pentadecanoate # \$ \$

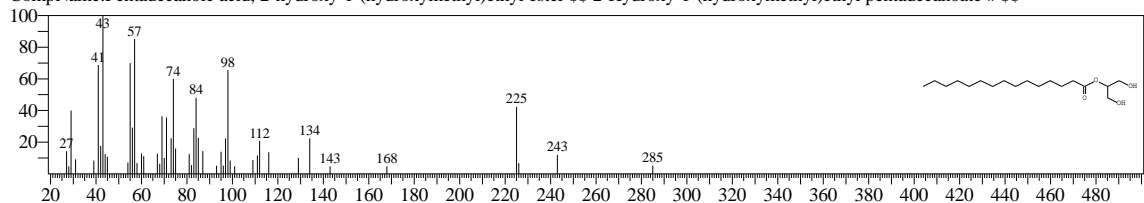

Hit#5 Entry:188122 Library:NIST08.LIB

SI:84 Formula:C35H68O5 CAS:761-35-3 MolWeight:568 RetIndex:4013

CompName:Hexadecanoic acid, 1-(hydroxymethyl)-1,2-ethanediyl ester \$ \$ Palmitin, 1,2-di- \$ \$ Dipalmitin \$ \$ Glycerol 1,2-dipalmitate \$ \$ 1,2-Dipalm

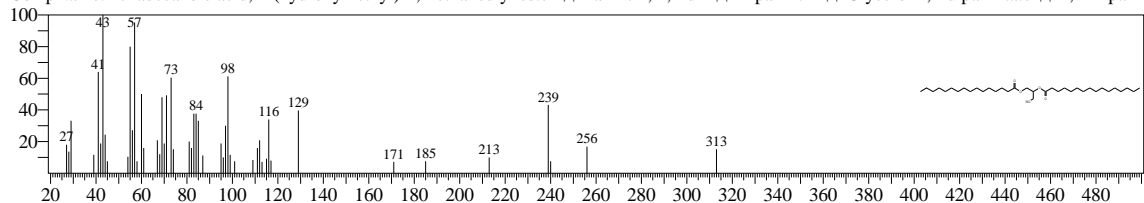

<< Target >>

Line#:19 R.Time:61.315(Scan#:11564) MassPeaks:313

RawMode:Averaged 61.310-61.320(11563-11565) BasePeak:55.00(1237)

BG Mode:Calc. from Peak Group 1 - Event 1

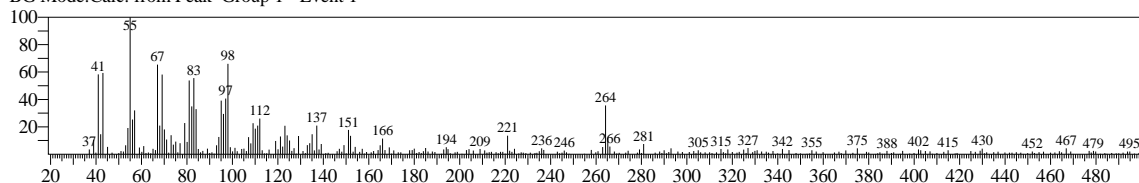

Hit#:1 Entry:112201 Library:NIST08.LIB

SI:88 Formula:C18H33ClO CAS:112-77-6 MolWeight:300 RetIndex:2131

CompName:Oleoyl chloride \$Oleic acid chloride \$9-Octadecenoyl chloride, (Z)- \$\$(9Z)-9-Octadecenoyl chloride #\$\$

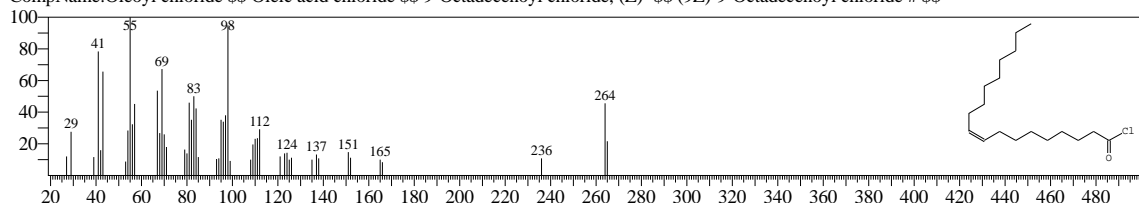

Hit#:2 Entry:148351 Library:NIST08.LIB

SI:88 Formula:C21H40O4 CAS:111-03-5 MolWeight:356 RetIndex:2689

CompName:9-Octadecenoic acid (Z)-, 2,3-dihydroxypropyl ester \$Olein, 1-mono- \$\$.alpha.-Monoolein \$Aldo HMO \$Aldo MO \$Glycerin 1-

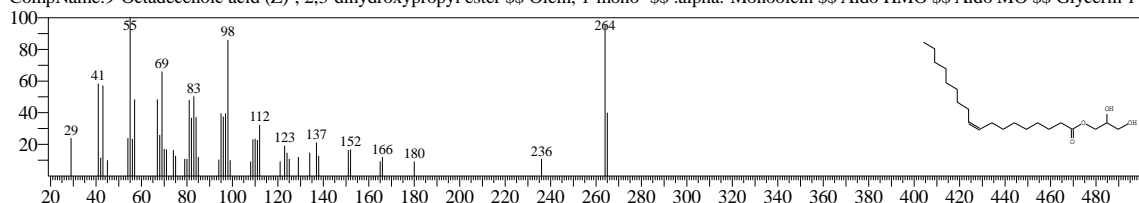

Hit#:3 Entry:191280 Library:NIST08.LIB

SI:88 Formula:C57H104O6 CAS:537-39-3 MolWeight:884 RetIndex:6149

CompName:9-Octadecenoic acid, 1,2,3-propanetriyl ester, (E,E,E)- \$2,3-Bis[(9E)-9-octadecenoyloxy]propyl (9E)-9-octadecenoate #\$\$

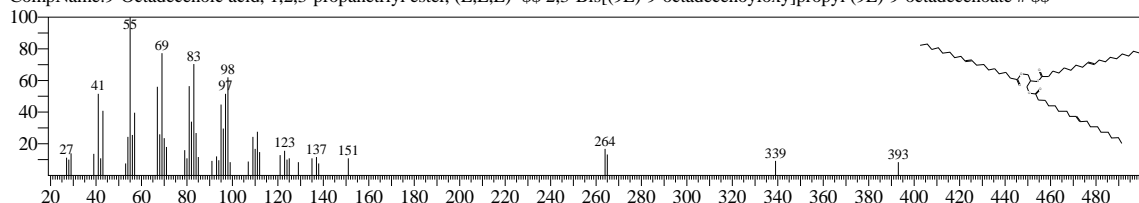

Hit#:4 Entry:187268 Library:NIST08.LIB

SI:87 Formula:C36H66O3 CAS:24909-72-6 MolWeight:546 RetIndex:3919

CompName:Oleic anhydride \$9-Octadecenoic acid (Z)-, anhydride \$\$(9Z)-9-Octadecenoic anhydride #\$\$

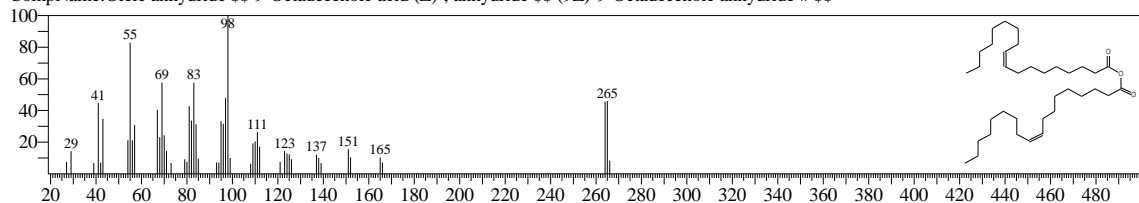

Hit#:5 Entry:148350 Library:NIST08.LIB

SI:86 Formula:C21H40O4 CAS:2716-53-2 MolWeight:356 RetIndex:2689

CompName:2,3-Dihydroxypropyl elaidate \$2,3-Dihydroxypropyl (9E)-9-octadecenoate #\$\$

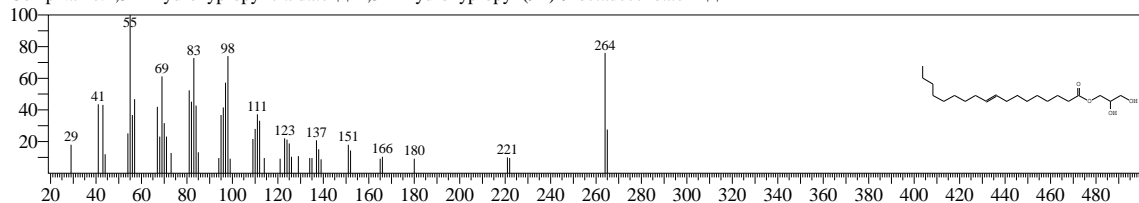

<< Target >>

Line#:20 R.Time:61.495(Scan#:11600) MassPeaks:306

RawMode:Averaged 61.490-61.500(11599-11601) BasePeak:55.00(2483)

BG Mode:Calc. from Peak Group 1 - Event 1

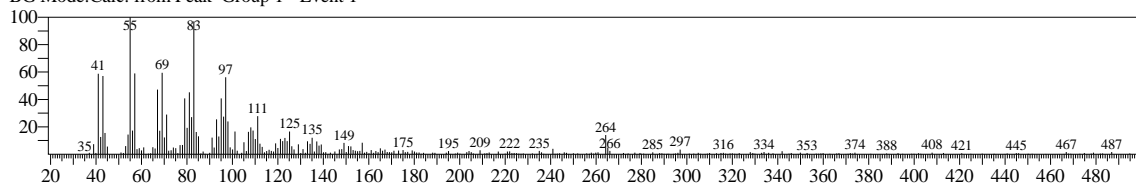

Hit#:1 Entry:77862 Library:NIST08.LIB

SI:87 Formula:C17H32O CAS:60609-53-2 MolWeight:252 RetIndex:1843

CompName:8-Hexadecenal, 14-methyl-, (Z)- \$\$ 14-Methyl-8-hexadecenal Z: \$\$ (8Z)-14-Methyl-8-hexadecenal # \$\$

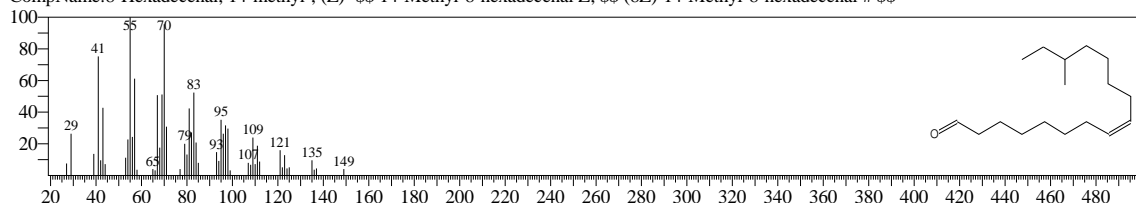

Hit#:2 Entry:87699 Library:NIST08.LIB

SI:86 Formula:C18H34O CAS:2423-10-1 MolWeight:266 RetIndex:2007

CompName:9-Octadecenal, (Z)- \$\$ Olealdehyde \$\$ cis-9-Octadecenal \$\$ Oleylaldehyde \$\$ Z-9-Octadecenal \$\$ (9Z)-9-Octadecenal # \$\$

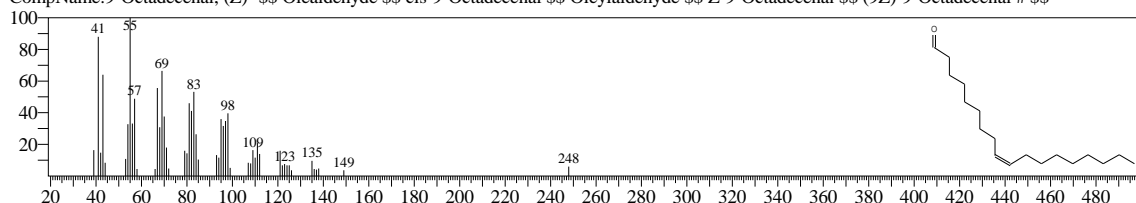

Hit#:3 Entry:191280 Library:NIST08.LIB

SI:86 Formula:C57H104O6 CAS:537-39-3 MolWeight:884 RetIndex:6149

CompName:9-Octadecenoic acid, 1,2,3-propanetriyl ester, (E,E,E)- \$\$ 2,3-Bis[(9E)-9-octadecenoyloxy]propyl (9E)-9-octadecenoate # \$\$

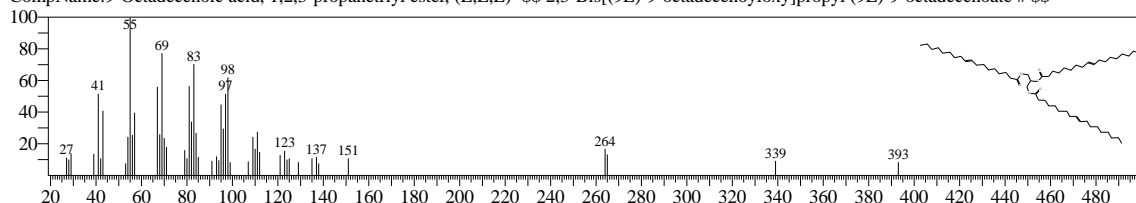

Hit#:4 Entry:20501 Library:NIST08s.LIB

SI:85 Formula:C16H30O CAS:56219-04-6 MolWeight:238 RetIndex:1808

CompName:cis-9-Hexadecenal \$\$ 9-Hexadecenal, (Z)- \$\$ (Z)-9-Hexadecenal \$\$ Z-9-Hexadecenal \$\$ (9Z)-9-Hexadecenal # \$\$

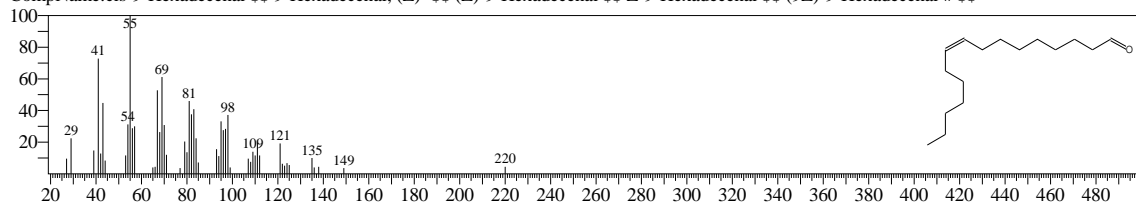

Hit#:5 Entry:49536 Library:NIST08.LIB

SI:85 Formula:C14H26O CAS:65128-96-3 MolWeight:210 RetIndex:1609

CompName:7-Tetradecenal, (Z)- \$\$ Z-7-Tetradecenal \$\$ (7Z)-7-Tetradecenal # \$\$

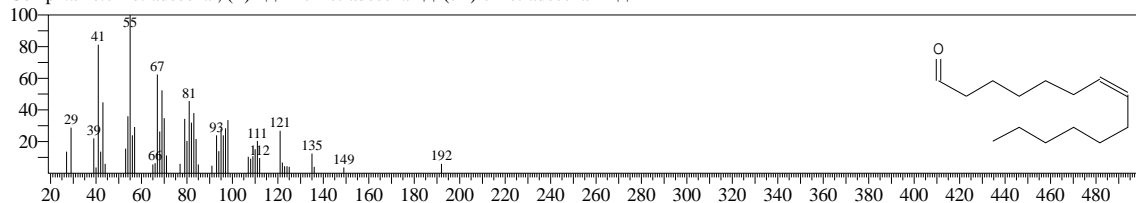

<< Target >>

Line#:21 R.Time:62.250(Scan#:11751) MassPeaks:266

RawMode:Averaged 62.245-62.255(11750-11752) BasePeak:74.00(5526)

BG Mode:Calc. from Peak Group 1 - Event 1

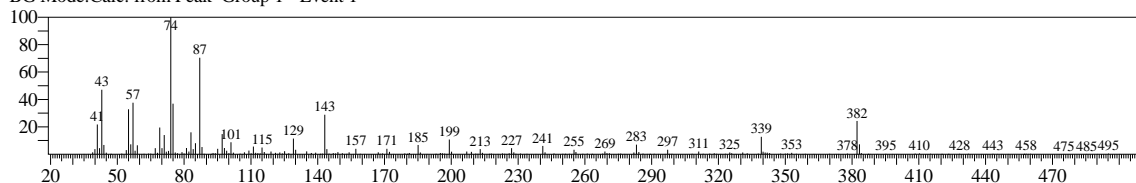

Hit#:1 Entry:1830 Library:FFNSC1.3.lib

SI:97 Formula:C25 H50 O2 CAS:2442-49-1 MolWeight:382 RetIndex:2732

CompName:Tetracosanoate <methyl->

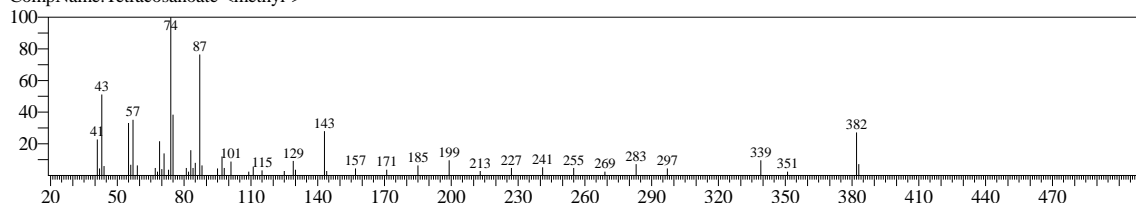

Hit#:2 Entry:130182 Library:NIST08.LIB

SI:89 Formula:C21H42O2 CAS:0-00-0 MolWeight:326 RetIndex:2212

CompName:Methyl 18-methylnonadecanoate

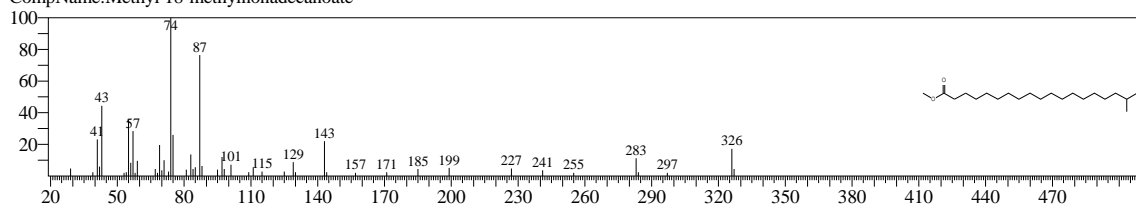

Hit#:3 Entry:1828 Library:FFNSC1.3.lib

SI:89 Formula:C21 H42 O2 CAS:1120-28-1 MolWeight:326 RetIndex:2328

CompName:Eicosanoate <methyl->

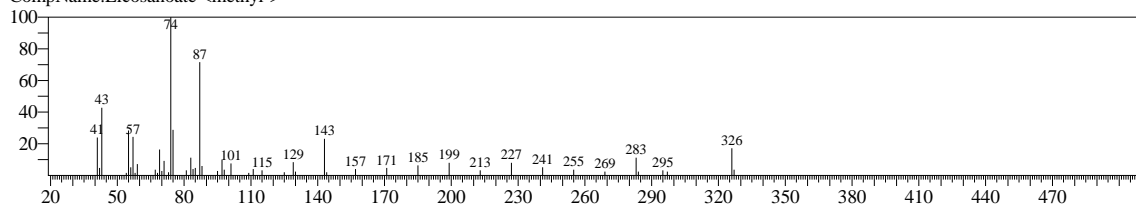

Hit#:4 Entry:1829 Library:FFNSC1.3.lib

SI:89 Formula:C23 H46 O2 CAS:929-77-1 MolWeight:354 RetIndex:2530

CompName:Docosanoate <methyl->

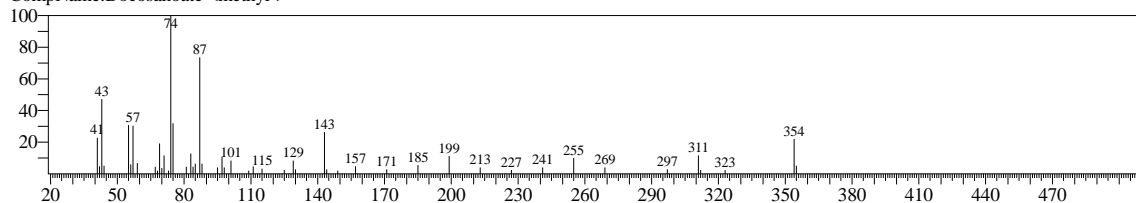

Hit#:5 Entry:27883 Library:NIST08s.LIB

SI:87 Formula:C31H62O2 CAS:629-83-4 MolWeight:466 RetIndex:3270

CompName:Tricontanoic acid, methyl ester \$\$ Methyl melissate \$\$ Methyl melissate \$\$ Methyl tricontanoate \$\$

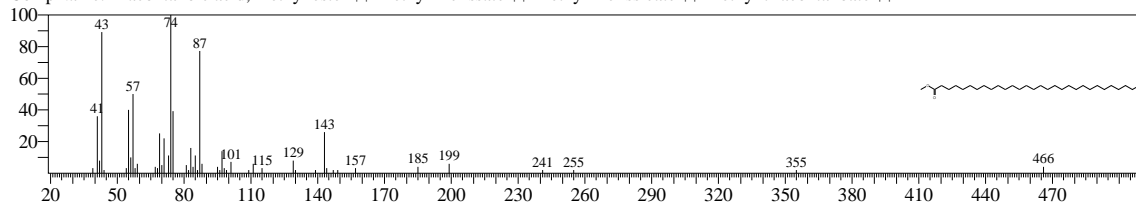

<< Target >>

Line#:22 R.Time:64.630(Scan#:12227) MassPeaks:326

RawMode:Averaged 64.625-64.635(12226-12228) BasePeak:69.05(30008)

BG Mode:Calc. from Peak Group 1 - Event 1

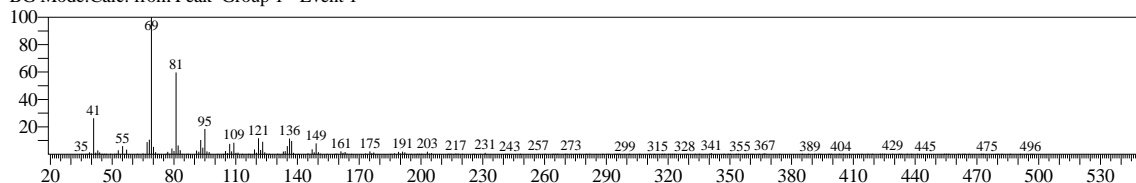

Hit#:1 Entry:170748 Library:NIST08.LIB

SI:97 Formula:C<sub>30</sub>H<sub>50</sub> CAS:111-02-4 MolWeight:410 RetIndex:2914

CompName:2,6,10,14,18,22-Tetracosahexaene, 2,6,10,15,19,23-hexamethyl-, (all-E)- \$\$ All-trans-Squalene \$\$ trans-Squalene \$\$ Spinacen \$\$ Spinac

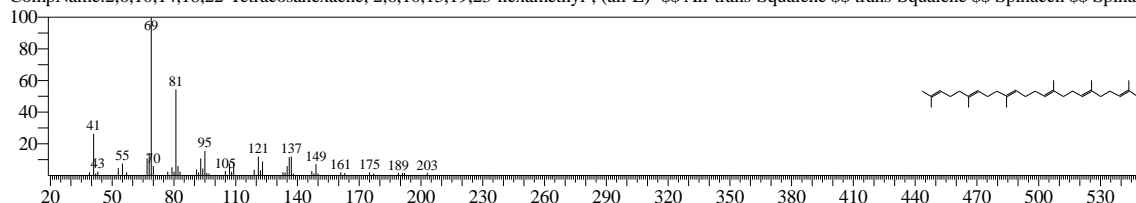

Hit#:2 Entry:27421 Library:NIST08.LIB

SI:97 Formula:C<sub>30</sub>H<sub>50</sub> CAS:7683-64-9 MolWeight:410 RetIndex:2914

CompName:Squalene \$\$ 2,6,10,14,18,22-Tetracosahexaene, 2,6,10,15,19,23-hexamethyl- \$\$ Skvalen \$\$ Spinacene \$\$ Supraene \$\$ (6E,10E,14E,18E

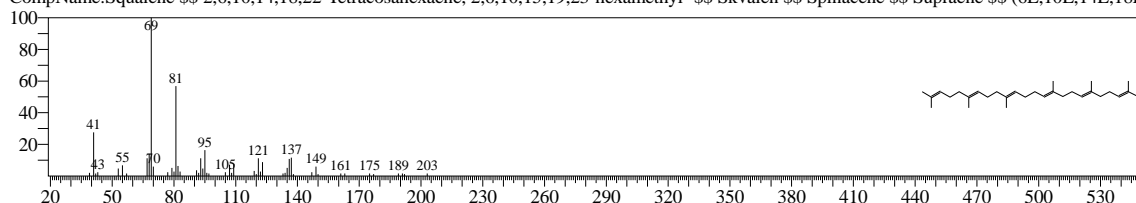

Hit#:3 Entry:140611 Library:NIST08.LIB

SI:91 Formula:C<sub>25</sub>H<sub>42</sub> CAS:75581-03-2 MolWeight:342 RetIndex:2432

CompName:2,6,10,14,18-Pentamethyl-2,6,10,14,18-eicosapentaene \$\$ (6E,10E,14E,18E)-2,6,10,14,18-Pentamethyl-2,6,10,14,18-icosapentaene # \$\$

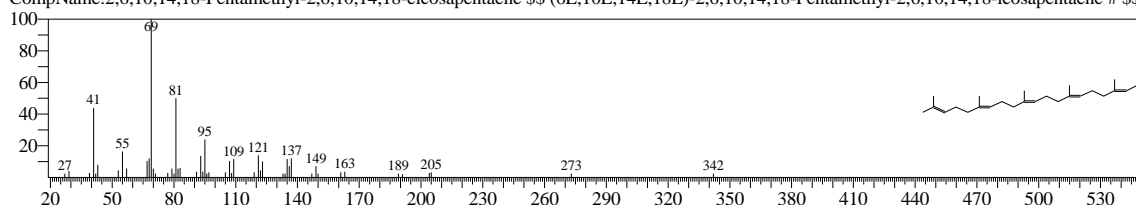

Hit#:4 Entry:28128 Library:NIST08.LIB

SI:91 Formula:C<sub>40</sub>H<sub>66</sub> CAS:502-62-5 MolWeight:546 RetIndex:3878

CompName:psi.,psi.-Carotene, 7,7',8,8',11,11',12,12',15,15'-decahydro- \$\$ 2,6,10,14,18,22,26,30-Dotriacontaoctaene, 2,6,10,14,19,23,27,31-octamet

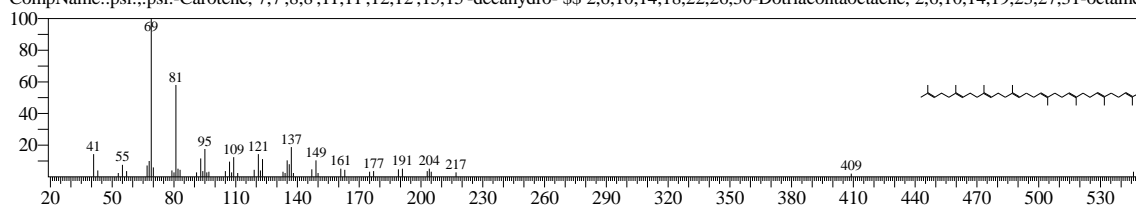

Hit#:5 Entry:23916 Library:NIST08.LIB

SI:91 Formula:C<sub>20</sub>H<sub>34</sub>O CAS:7614-21-3 MolWeight:290 RetIndex:2192

CompName:Hexadeca-2,6,10,14-tetraen-1-ol, 3,7,11,16-tetramethyl-, (E,E,E)- \$\$ (2Z,6E,10E)-3,7,11,15-Tetramethyl-2,6,10,14-hexadecatetraen-1-ol

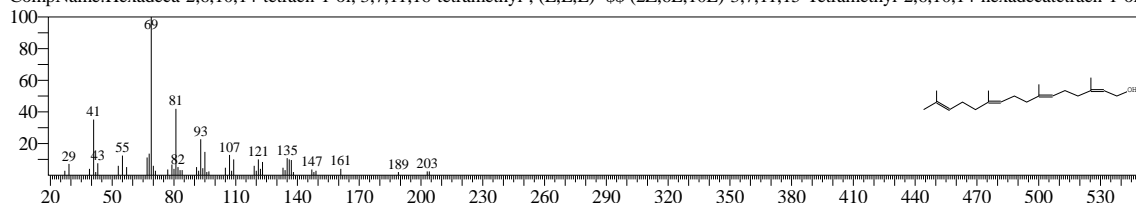

<< Target >>

Line#:23 R.Time:70.805(Scan#:13462) MassPeaks:340

RawMode:Averaged 70.800-70.810(13461-13463) BasePeak:83.05(4691)

BG Mode:Calc. from Peak Group 1 - Event 1

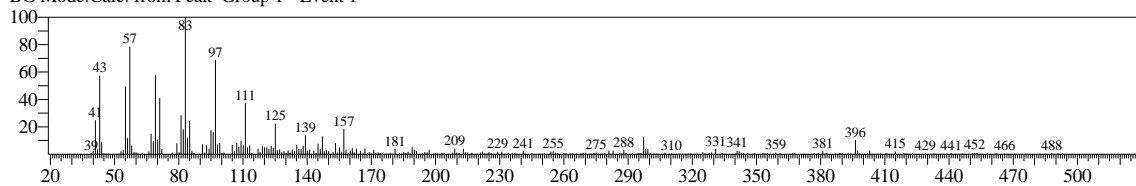

Hit#:1 Entry:188608 Library:NIST08.LIB

SI:83 Formula:C33H61F5O2 CAS:0-00-0 MolWeight:584 RetIndex:3164

CompName:Triacetyl pentafluoropropionate

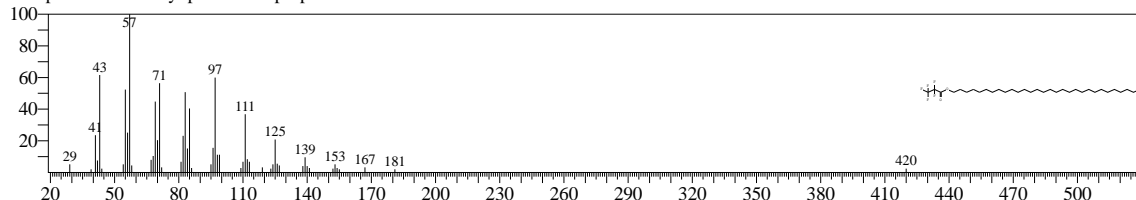

Hit#:2 Entry:170725 Library:NIST08.LIB

SI:82 Formula:C28H58O CAS:0-00-0 MolWeight:410 RetIndex:3047

CompName:1-Octacosanol

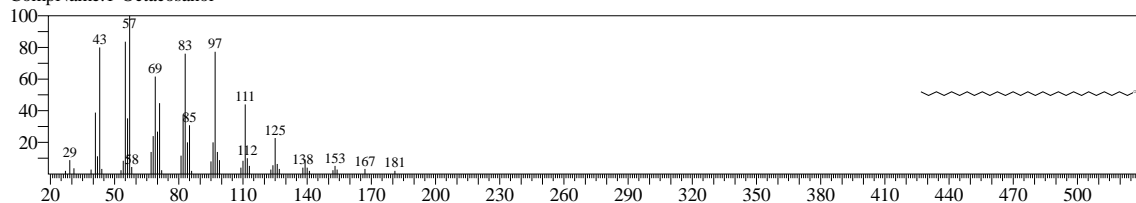

Hit#:3 Entry:187067 Library:NIST08.LIB

SI:82 Formula:C30H55F5O2 CAS:0-00-0 MolWeight:542 RetIndex:2866

CompName:Heptacosyl pentafluoropropionate

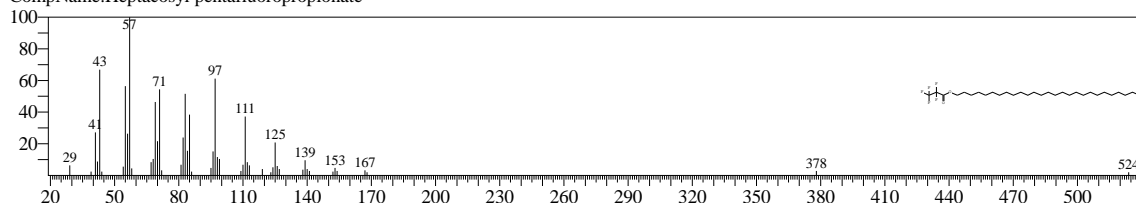

Hit#:4 Entry:186412 Library:NIST08.LIB

SI:82 Formula:C29H53F5O2 CAS:0-00-0 MolWeight:528 RetIndex:2767

CompName:Hexacosyl pentafluoropropionate

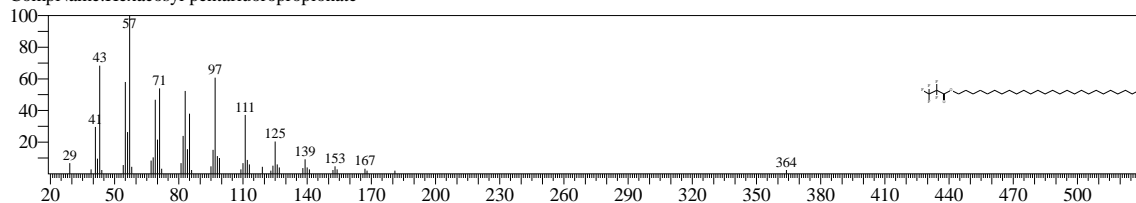

Hit#:5 Entry:184619 Library:NIST08.LIB

SI:82 Formula:C27H49F5O2 CAS:0-00-0 MolWeight:500 RetIndex:2568

CompName:Tetracosyl pentafluoropropionate

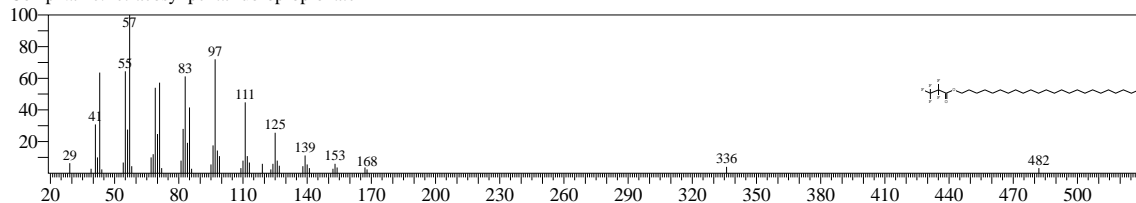

<< Target >>

Line#:24 R.Time:71.325(Scan#:13566) MassPeaks:336

RawMode:Averaged 71.320-71.330(13565-13567) BasePeak:43.00(2849)

BG Mode:Calc. from Peak Group 1 - Event 1

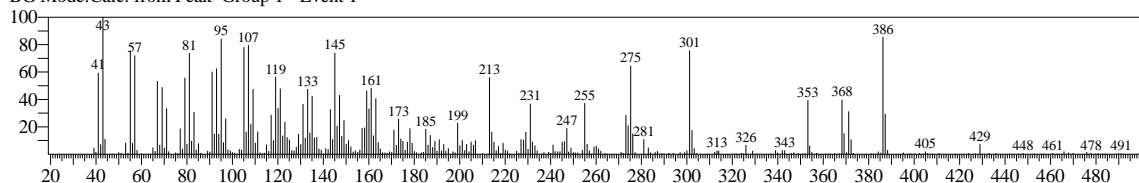

Hit#:1 Entry:27029 Library:NIST08s.LIB

SI:93 Formula:C<sub>27</sub>H<sub>46</sub>O CAS:57-88-5 MolWeight:386 RetIndex:2596

CompName:Cholesterol \$\$ Cholest-5-en-3-ol (3.beta.)- \$\$ (-)-Cholesterol \$\$ Cholest-5-en-3.beta.-ol \$\$ Cholesterin \$\$ Cholesterol base H \$\$ Cholest

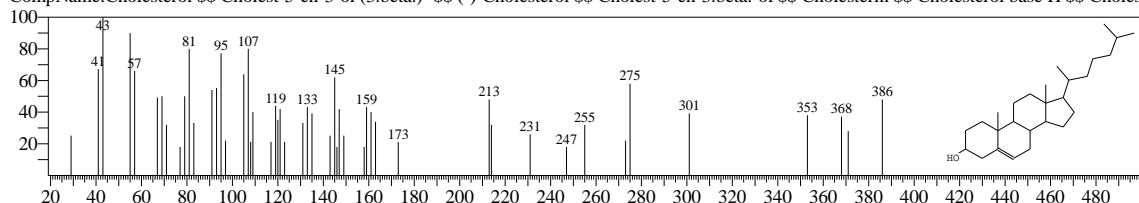

Hit#:2 Entry:162895 Library:NIST08s.LIB

SI:86 Formula:C<sub>27</sub>H<sub>46</sub>O CAS:0-00-0 MolWeight:386 RetIndex:2596

CompName:17-(1,5-Dimethylhexyl)-10,13-dimethyl-2,3,4,7,8,9,10,11,12,13,14,15,16,17-tetradecahydro-1H-cyclopenta[a]phenanthren-3-ol

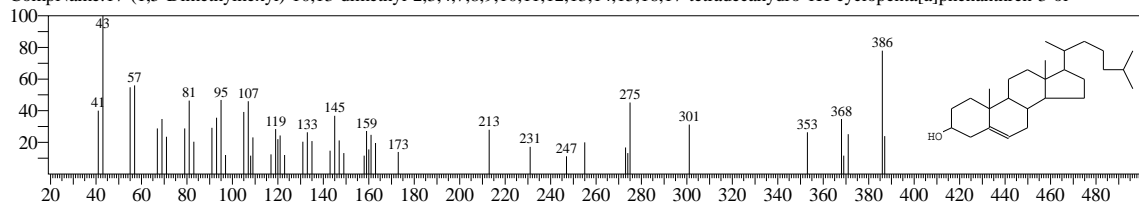

Hit#:3 Entry:27306 Library:NIST08s.LIB

SI:85 Formula:C<sub>28</sub>H<sub>48</sub>O CAS:1174-92-1 MolWeight:400 RetIndex:2545

CompName:Cholest-5-ene, 3-methoxy-, (3.beta.)- \$\$ Cholest-5-ene, 3.beta.-methoxy- \$\$ Cholesterin methyl ether \$\$ Cholesterol methyl ether \$\$ Cho

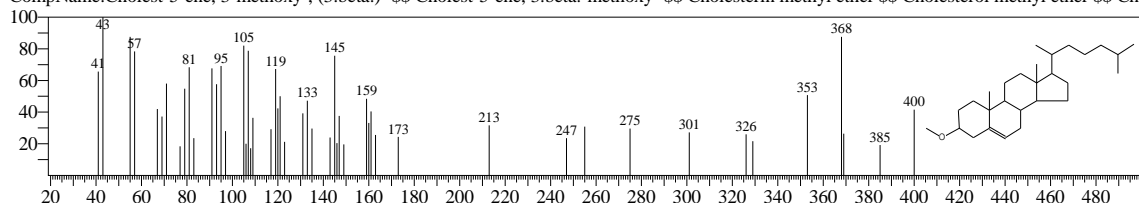

Hit#:4 Entry:178485 Library:NIST08s.LIB

SI:84 Formula:C<sub>29</sub>H<sub>50</sub>O<sub>3</sub> CAS:41721-93-1 MolWeight:446 RetIndex:2926

CompName:Cholestane-3,5-diol, 5-acetate, (3.beta.,5.alpha.)- \$\$ 3-Hydroxycholestan-5-yl acetate # \$\$

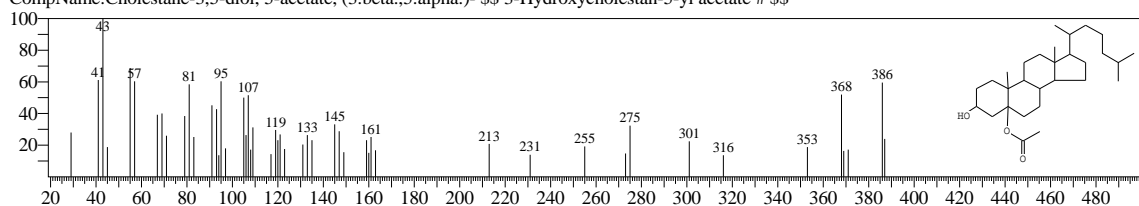

Hit#:5 Entry:27775 Library:NIST08s.LIB

SI:78 Formula:C<sub>28</sub>H<sub>45</sub>ClO<sub>2</sub> CAS:7144-08-3 MolWeight:448 RetIndex:2813

CompName:Cholest-5-en-3-ol (3.beta.)-, carbonochloridate \$\$ Cholesterol, chloroformate \$\$ Cholesteryl chloroformate \$\$ Cholesteryloxycarbonyl cl

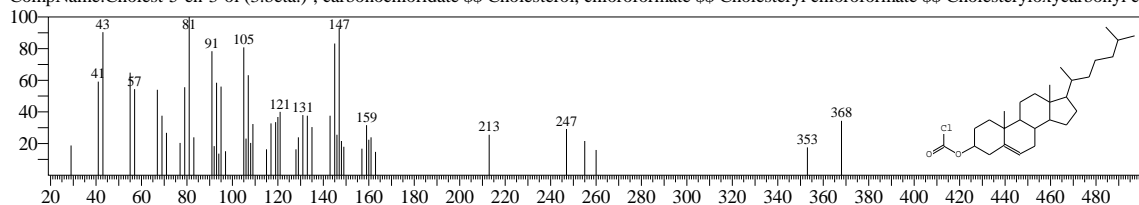

<< Target >>

Line#:25 R.Time:71.635(Scan#:13628) MassPeaks:270

RawMode:Averaged 71.630-71.640(13627-13629) BasePeak:165.05(24682)

BG Mode:Calc. from Peak Group 1 - Event 1

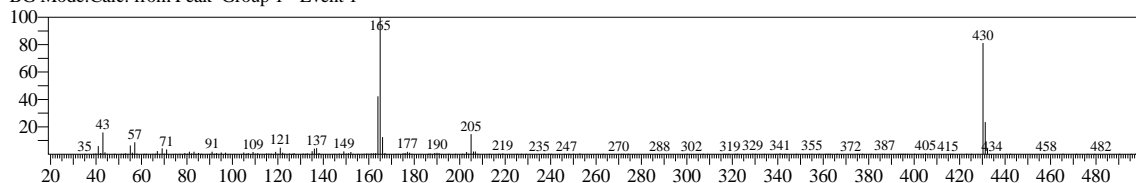

Hit#:1 Entry:27663 Library:NIST08s.LIB

SI:94 Formula:C<sub>29</sub>H<sub>50</sub>O<sub>2</sub> CAS:10191-41-0 MolWeight:430 RetIndex:3149

CompName:dl.-alpha.-Tocopherol \$\$ (+/-)-.alpha.-Tocopherol \$\$ Vitamin E \$\$ 2H-1-Benzopyran-6-ol, 3,4-dihydro-2,5,7,8-tetramethyl-2-(4,8,12-tri

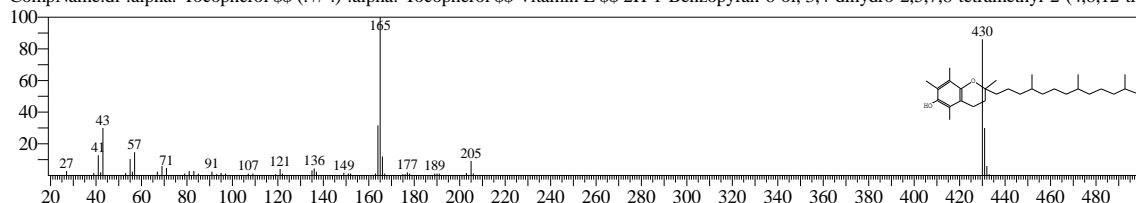

Hit#:2 Entry:188803 Library:NIST08.LIB

SI:94 Formula:C<sub>35</sub>H<sub>60</sub>O<sub>7</sub> CAS:0-00-0 MolWeight:592 RetIndex:4489

CompName:.alpha.-Tocopherol-.beta.-D-mannoside

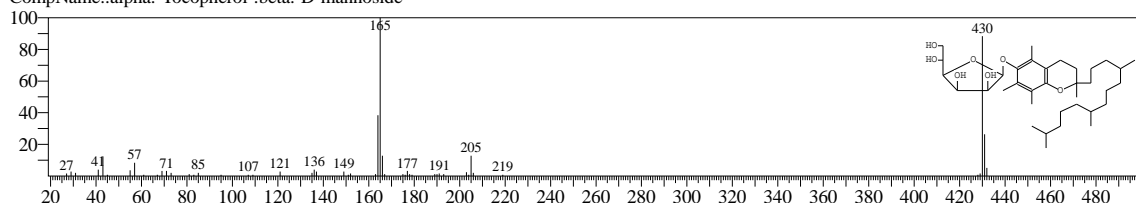

Hit#:3 Entry:27664 Library:NIST08s.LIB

SI:93 Formula:C<sub>29</sub>H<sub>50</sub>O<sub>2</sub> CAS:59-02-9 MolWeight:430 RetIndex:3149

CompName:Vitamin E \$\$ 2H-1-Benzopyran-6-ol, 3,4-dihydro-2,5,7,8-tetramethyl-2-(4,8,12-trimethyltridecyl)-, [2R-[2R\*(4R\*,8R\*)]]- \$\$ .alpha.-Toc

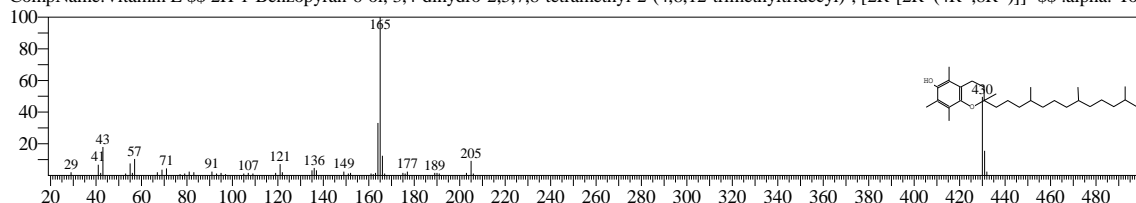

Hit#:4 Entry:181985 Library:NIST08.LIB

SI:89 Formula:C<sub>31</sub>H<sub>52</sub>O<sub>3</sub> CAS:58-95-7 MolWeight:472 RetIndex:3308

CompName:2H-1-Benzopyran-6-ol, 3,4-dihydro-2,5,7,8-tetramethyl-2-(4,8,12-trimethyltridecyl)-, acetate, [2R-[2R\*(4R\*,8R\*)]]- \$\$ Vitamin E acetat

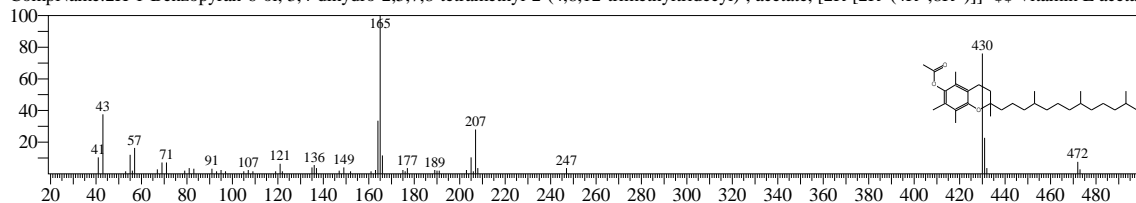

Hit#:5 Entry:27909 Library:NIST08s.LIB

SI:87 Formula:C<sub>31</sub>H<sub>52</sub>O<sub>3</sub> CAS:7695-91-2 MolWeight:472 RetIndex:3308

CompName:(+)-.alpha.-Tocopherol acetate \$\$ 2H-1-Benzopyran-6-ol, 3,4-dihydro-2,5,7,8-tetramethyl-2-(4,8,12-trimethyltridecyl)-, acetate \$\$ Vitami

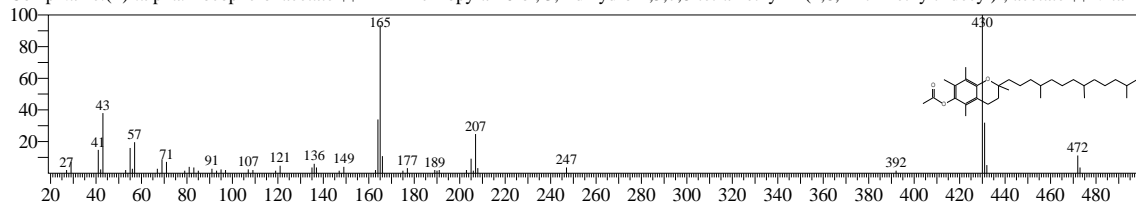

<< Target >>

Line#:26 R.Time:73.245(Scan#:13950) MassPeaks:341

RawMode:Averaged 73.240-73.250(13949-13951) BasePeak:69.05(2343)

BG Mode:Calc. from Peak Group 1 - Event 1

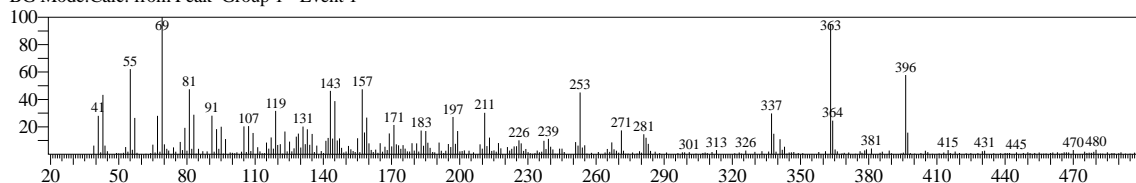

Hit#:1 Entry:166598 Library:NIST08.LIB

SI:92 Formula:C<sub>28</sub>H<sub>44</sub>O CAS:57-87-4 MolWeight:396 RetIndex:2650

CompName:Ergosterol \$\$ Ergosta-5,7,22-trien-3-ol, (3.beta.,22E)- \$\$ Ergosterin \$\$ Provitamin D \$\$ Provitamin D2 \$\$ (3.beta.)-Ergosta-5,7,22- trien

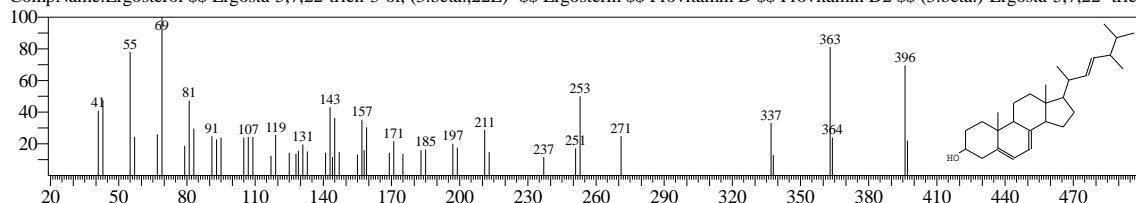

Hit#:2 Entry:166605 Library:NIST08.LIB

SI:87 Formula:C<sub>28</sub>H<sub>44</sub>O CAS:50657-31-3 MolWeight:396 RetIndex:2679

CompName:Ergosta-5,8,22-trien-3-ol, (3.beta.,22E)- \$\$ .delta.5,8(9),22-Ergostatrien-3.beta.-ol \$\$ Ergosta-5,8,22-trien-3.beta.-ol \$\$ Lichesterol \$\$ Er

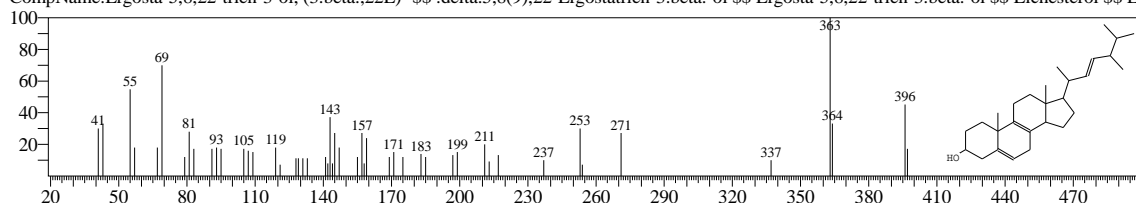

Hit#:3 Entry:166596 Library:NIST08.LIB

SI:80 Formula:C<sub>28</sub>H<sub>44</sub>O CAS:97583-19-2 MolWeight:396 RetIndex:2650

CompName:Ergosta-4,7,22-trien-3.beta.-ol \$\$ (22E)-Ergosta-4,7,22-trien-3-ol # \$\$

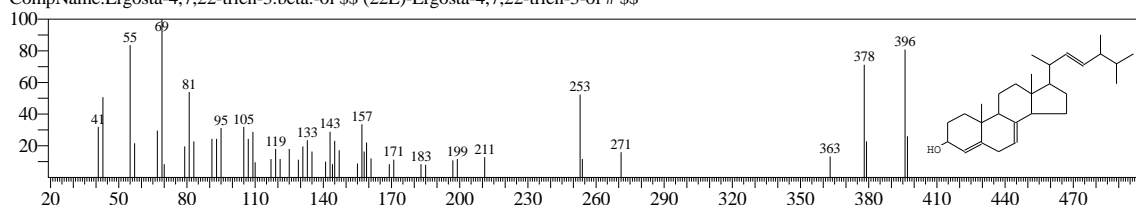

Hit#:4 Entry:166599 Library:NIST08.LIB

SI:79 Formula:C<sub>28</sub>H<sub>44</sub>O CAS:6538-05-2 MolWeight:396 RetIndex:2650

CompName:Ergost-4,7,22-trien-3.alpha.-ol \$\$ (22E)-Ergosta-4,7,22-trien-3-ol # \$\$

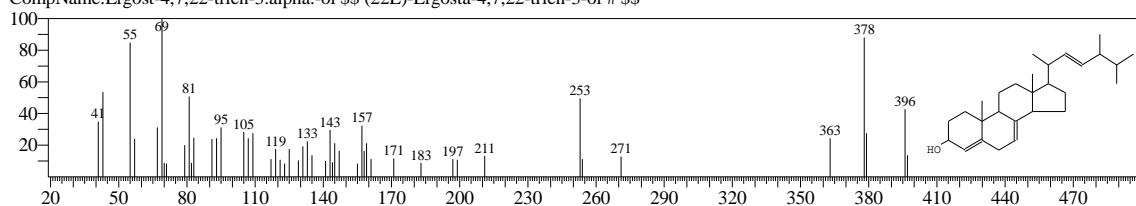

Hit#:5 Entry:161197 Library:NIST08.LIB

SI:75 Formula:C<sub>27</sub>H<sub>42</sub>O CAS:0-00-0 MolWeight:382 RetIndex:2615

CompName:17-(1,5-Dimethyl-hex-2-enyl)-10,13-dimethyl-2,3,4,9,10,11,12,13,14,15,16,17-dodecahydro-1H-cyclopenta[a]phenanthren-3-ol

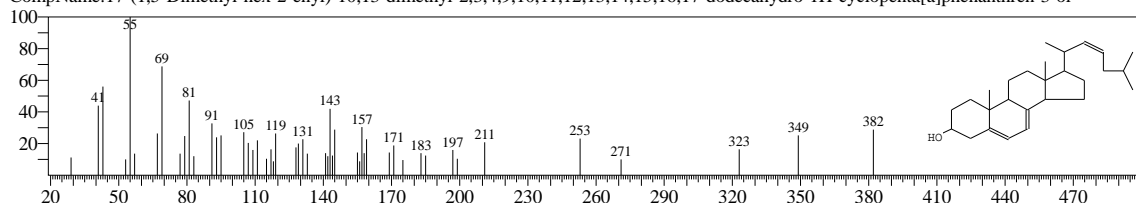

<< Target >>

Line#:27 R.Time:73.715(Scan#:14044) MassPeaks:339

RawMode:Averaged 73.710-73.720(14043-14045) BasePeak:43.05(3922)

BG Mode:Calc. from Peak Group 1 - Event 1

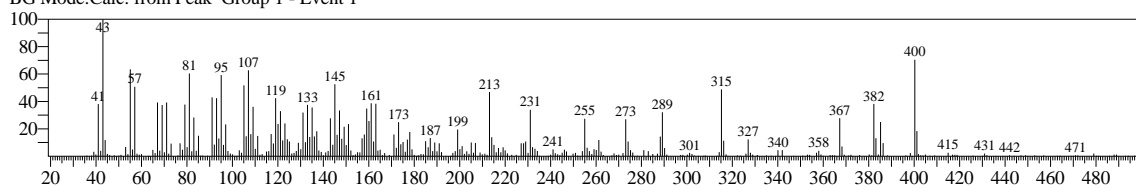

Hit#:1 Entry:168088 Library:NIST08.LIB

SI:87 Formula:C<sub>28</sub>H<sub>48</sub>O CAS:4651-51-8 MolWeight:400 RetIndex:2632

CompName:Ergost-5-en-3-ol, (3.beta.)- \$ \$ Ergost-5-en-3.beta.-ol \$ \$.delta.22-Dihydrobrassicasterol \$ \$.delta.5-Ergostenol \$ \$ Dihydrobrassicasterol \$

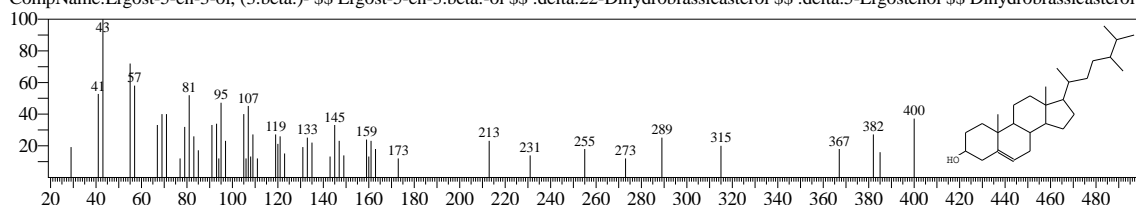

Hit#:2 Entry:168084 Library:NIST08.LIB

SI:84 Formula:C<sub>28</sub>H<sub>48</sub>O CAS:474-62-4 MolWeight:400 RetIndex:2632

CompName:Campesterol \$ \$ Ergost-5-en-3-ol, (3.beta.,24R)- \$ \$ Ergost-5-en-3.beta.-ol, (24R)- \$ \$ (24R)-5-Ergosten-3.beta.-ol \$ \$ Campesterin \$ \$ Can

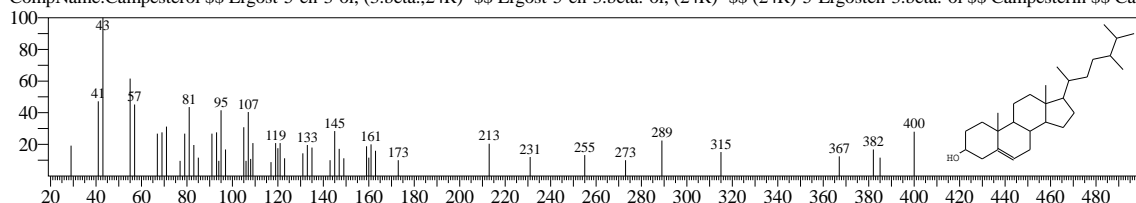

Hit#:3 Entry:168089 Library:NIST08.LIB

SI:81 Formula:C<sub>28</sub>H<sub>48</sub>O CAS:26047-31-4 MolWeight:400 RetIndex:2632

CompName:Ergost-7-en-3-ol, (3.beta.)- \$ \$ Ergost-7-en-3.beta.-ol \$ \$.delta.7-Ergostenol \$ \$ Ergosta-7-en-3.beta.-ol \$ \$ Ergost-7-en-3-ol # \$ \$

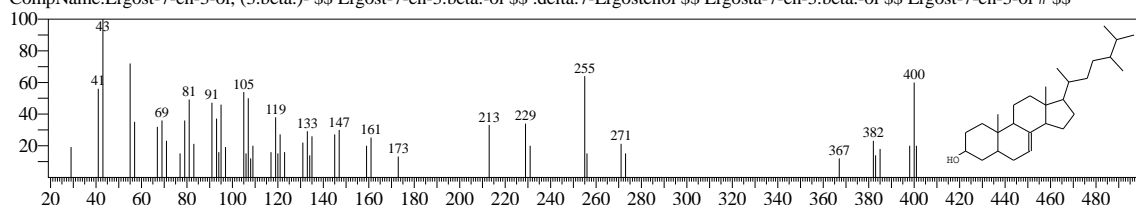

Hit#:4 Entry:27306 Library:NIST08.LIB

SI:78 Formula:C<sub>28</sub>H<sub>48</sub>O CAS:1174-92-1 MolWeight:400 RetIndex:2545

CompName:Cholest-5-ene, 3-methoxy-, (3.beta.)- \$ \$ Cholest-5-ene, 3.beta.-methoxy- \$ \$ Cholesterin methyl ether \$ \$ Cholesterol methyl ether \$ \$ Ch

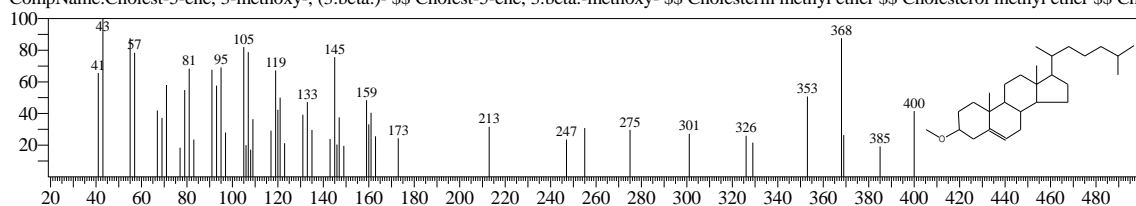

Hit#:5 Entry:168087 Library:NIST08.LIB

SI:78 Formula:C<sub>28</sub>H<sub>48</sub>O CAS:29944-53-4 MolWeight:400 RetIndex:2545

CompName:Isocholesteryl methyl ether \$ \$ 3.alpha.-Cholesterol methyl ether \$ \$ 3-Methoxycholest-5-ene # \$ \$

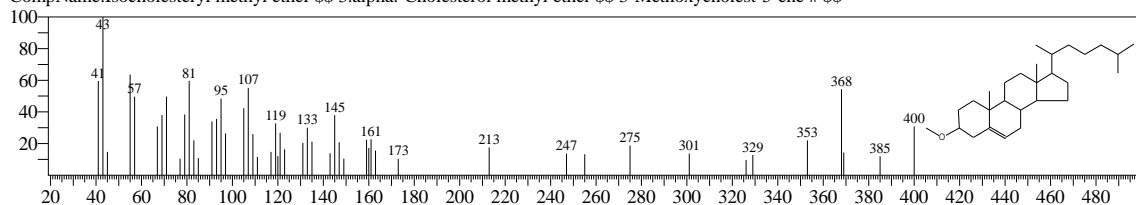

<< Target >>

Line#:28 R.Time:74.405(Scan#:14182) MassPeaks:330

RawMode:Averaged 74.400-74.410(14181-14183) BasePeak:55.05(1170)

BG Mode:Calc. from Peak Group 1 - Event 1

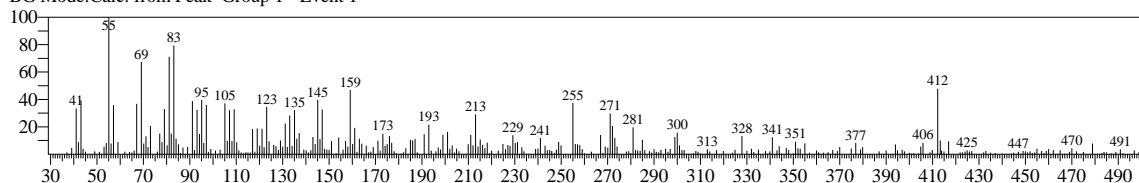

Hit#:1 Entry:171275 Library:NIST08.LIB

SI:85 Formula:C<sub>29</sub>H<sub>48</sub>O CAS:83-48-7 MolWeight:412 RetIndex:2739

CompName:Stigmasterol \$\$ Stigmasta-5,22-dien-3-ol, (3.beta.,22E)- \$\$ Stigmasta-5,22-dien-3.beta.-ol .beta.-Stigmasterol \$\$ (24S)-5,22-Stigmast

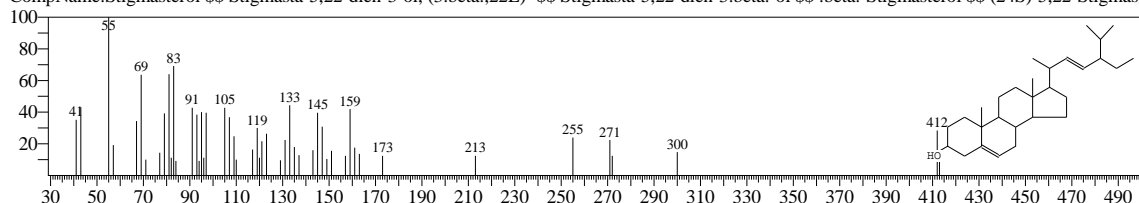

Hit#:2 Entry:171274 Library:NIST08.LIB

SI:81 Formula:C<sub>29</sub>H<sub>48</sub>O CAS:481-17-4 MolWeight:412 RetIndex:2739

CompName:Chondrillasterol \$\$ Stigmasta-7,22-dien-3-ol, (3.beta.,5.alpha.,22E,24R)- \$\$ 5.alpha.-Stigmasta-7,22-dien-3.beta.-ol, (24R)- \$\$ (22E)-Sti

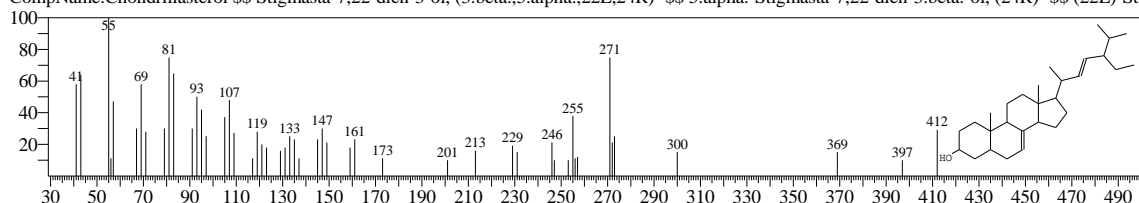

Hit#:3 Entry:174616 Library:NIST08.LIB

SI:79 Formula:C<sub>30</sub>H<sub>50</sub>O CAS:29782-65-8 MolWeight:426 RetIndex:2768

CompName:Gorgost-5-en-3-ol, (3.beta.)- \$\$ Pregn-5-en-3.beta.-ol, 20.alpha.-[(1R,2R)-2-(1R)-1,2-dimethylpropyl-2-methylcyclopropyl]- \$\$ Gorgoste

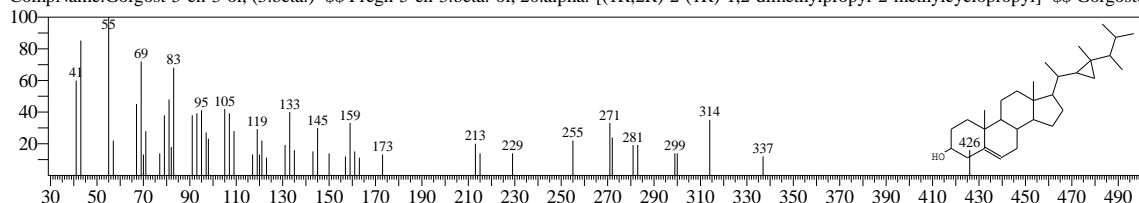

Hit#:4 Entry:171296 Library:NIST08.LIB

SI:78 Formula:C<sub>29</sub>H<sub>48</sub>O CAS:57815-94-8 MolWeight:412 RetIndex:2739

CompName:Stigmasta-4,22-dien-3.beta.-ol \$\$ (22E)-Stigmasta-4,22-dien-3-ol # \$\$

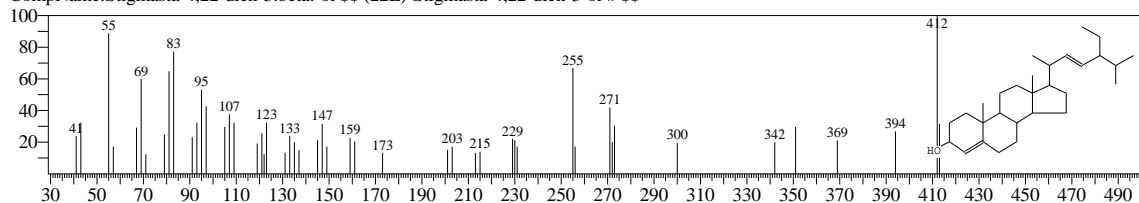

Hit#:5 Entry:167339 Library:NIST08.LIB

SI:78 Formula:C<sub>28</sub>H<sub>46</sub>O CAS:177962-83-3 MolWeight:398 RetIndex:2671

CompName:Ergost-5,8(14)-dien-3-ol \$\$ Ergosta-5,8(14)-dien-3-ol # \$\$

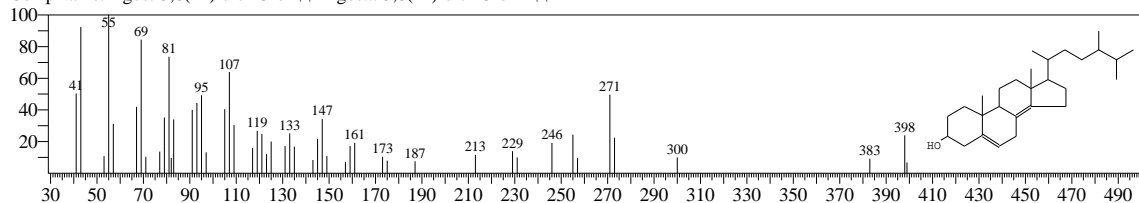

<< Target >>

Line#:29 R.Time:74.715(Scan#:14244) MassPeaks:281

RawMode:Averaged 74.710-74.720(14243-14245) BasePeak:69.05(3932)

BG Mode:Calc. from Peak Group 1 - Event 1

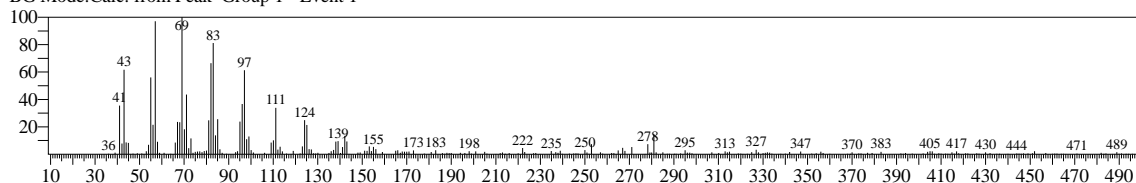

Hit#:1 Entry:170725 Library:NIST08.LIB

SI:86 Formula:C28H58O CAS:0-00-0 MolWeight:410 RetIndex:3047

CompName:1-Octacosanol

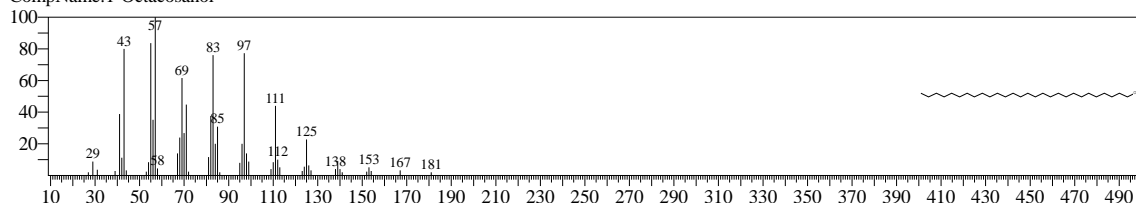

Hit#:2 Entry:166592 Library:NIST08.LIB

SI:86 Formula:C27H56O CAS:2004-39-9 MolWeight:396 RetIndex:2948

CompName:1-Heptacosanol \$\$\$\$ Heptacosan-1-ol \$\$\$\$ Heptacosanol \$\$\$\$

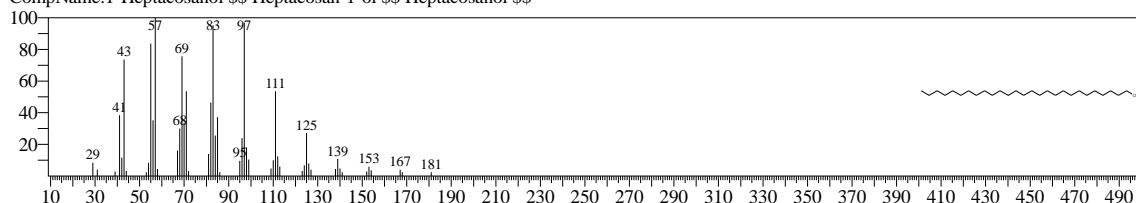

Hit#:3 Entry:26940 Library:NIST08s.LIB

SI:86 Formula:C26H54O CAS:506-52-5 MolWeight:382 RetIndex:2848

CompName:1-Hexacosanol \$\$\$\$ n-Hexacosanol \$\$\$\$ Ceryl alcohol \$\$\$\$ Cerylic alcohol \$\$\$\$ Hexacosyl alcohol \$\$\$\$

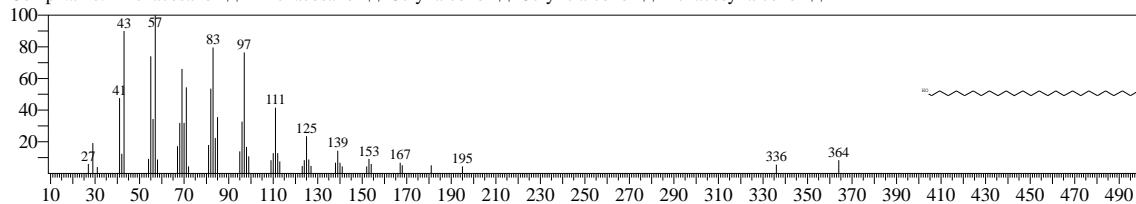

Hit#:4 Entry:188819 Library:NIST08.LIB

SI:86 Formula:C41H84O CAS:40710-42-7 MolWeight:592 RetIndex:4339

CompName:1-Hentetracontanol

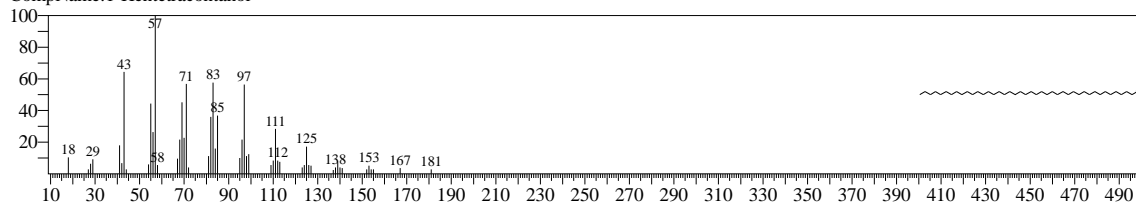

Hit#:5 Entry:147498 Library:NIST08.LIB

SI:86 Formula:C24H50O CAS:506-51-4 MolWeight:354 RetIndex:2650

CompName:n-Tetracosanol-1 \$\$\$\$ Lignoceric alcohol \$\$\$\$ Lignoceryl alcohol \$\$\$\$ 1-Tetracosanol \$\$\$\$ Tetracosan-1-ol \$\$\$\$ Tetracosyl alcohol \$\$\$\$ Lignoceryl

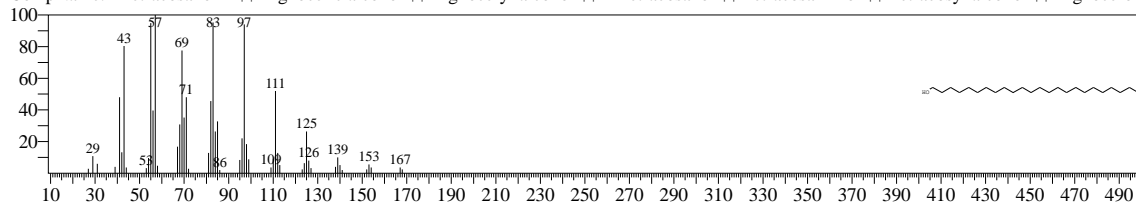

<< Target >>

Line#:30 R.Time:75.645(Scan#:14430) MassPeaks:389

RawMode:Averaged 75.640-75.650(14429-14431) BasePeak:43.05(44837)

BG Mode:Calc. from Peak Group 1 - Event 1

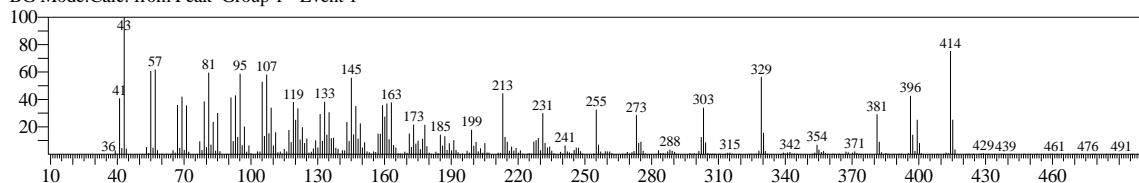

Hit#:1 Entry:171855 Library:NIST08.LIB

SI:88 Formula:C<sub>29</sub>H<sub>50</sub>O CAS:83-47-6 MolWeight:414 RetIndex:2731

CompName:gamma-Sitosterol \$\$ Stigmasterol (3beta,24S)- Stigmasterol (3beta,24S)- Clonasterol \$\$ Fucosterol, beta-dihydro

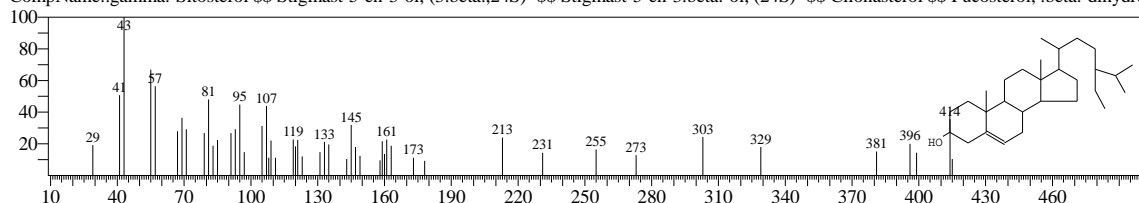

Hit#:2 Entry:27488 Library:NIST08.LIB

SI:83 Formula:C<sub>29</sub>H<sub>50</sub>O CAS:83-46-5 MolWeight:414 RetIndex:2731

CompName:beta-Sitosterol \$\$ Stigmasterol (3beta)- Stigmasterol (3beta)-ol \$\$.alpha-Dihydrofucosterol \$\$.beta-Sitosterin \$\$ Angelic

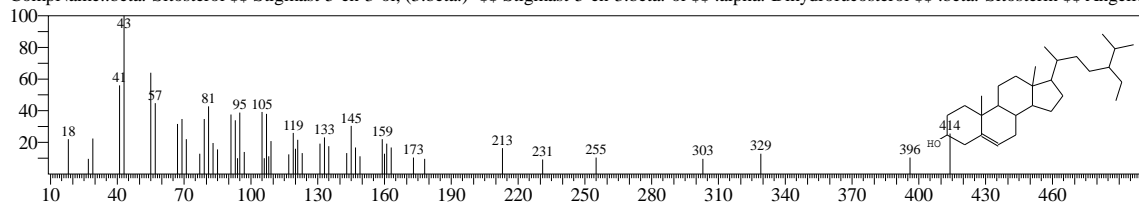

Hit#:3 Entry:168088 Library:NIST08.LIB

SI:77 Formula:C<sub>28</sub>H<sub>48</sub>O CAS:4651-51-8 MolWeight:400 RetIndex:2632

CompName:Ergosterol (3beta)- Ergosterol (3beta)-ol \$\$.delta.22-Dihydrobrassicasterol \$\$.delta.5-Ergosterol \$\$ Dihydrobrassicasterol

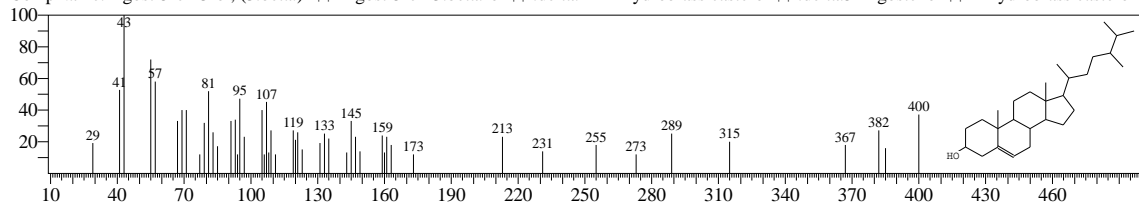

Hit#:4 Entry:168087 Library:NIST08.LIB

SI:77 Formula:C<sub>28</sub>H<sub>48</sub>O CAS:29944-53-4 MolWeight:400 RetIndex:2545

CompName:Isocholesterol methyl ether \$\$.3.alpha-Cholesterol methyl ether \$\$.3-Methoxycholesterol-5-ene #

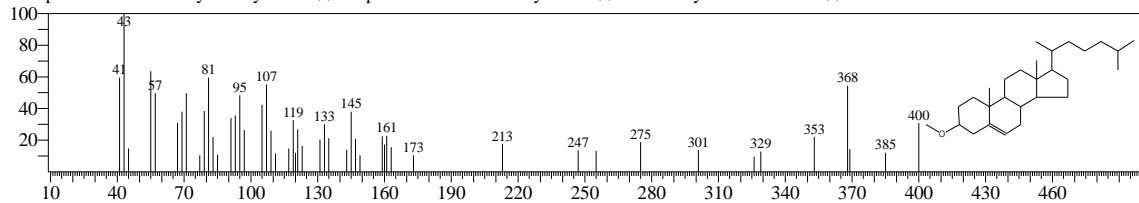

Hit#:5 Entry:27029 Library:NIST08.LIB

SI:76 Formula:C<sub>27</sub>H<sub>46</sub>O CAS:57-88-5 MolWeight:386 RetIndex:2596

CompName:Cholesterol \$\$.Cholest-5-en-3-ol (3beta)- \$\$.(-)-Cholesterol \$\$.Cholest-5-en-3-ol \$\$.Cholesterin \$\$.Cholesterol base H \$\$.Cholest

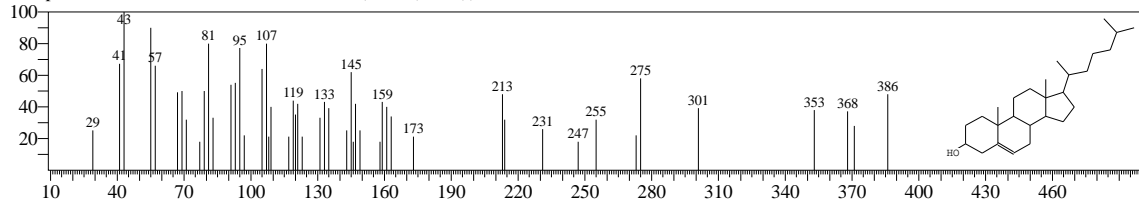

<< Target >>

Line#:31 R.Time:75.835(Scan#:14468) MassPeaks:322

RawMode:Averaged 75.830-75.840(14467-14469) BasePeak:233.10(3009)

BG Mode:Calc. from Peak Group 1 - Event 1

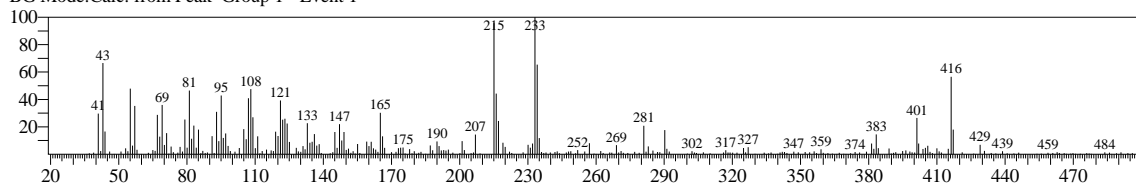

Hit#:1 Entry:172369 Library:NIST08.LIB

SI:84 Formula:C<sub>29</sub>H<sub>52</sub>O CAS:19466-47-8 MolWeight:416 RetIndex:2720

CompName:Stigmastanol \$\$ Stigmastan-3-ol, (3.beta.)- \$\$ Stigmastan-3-ol # \$

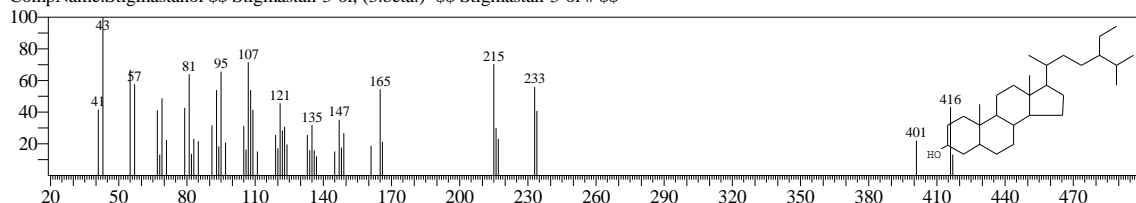

Hit#:2 Entry:163705 Library:NIST08.LIB

SI:79 Formula:C<sub>27</sub>H<sub>48</sub>O CAS:80-97-7 MolWeight:388 RetIndex:2586

CompName:Cholestanol \$\$ Cholestan-3-ol, (3.beta.,5.alpha.)- \$\$ 5.alpha.-Cholestan-3.beta.-ol \$\$ .beta.-Cholestanol \$\$ Cholestan-3.beta.-ol \$ Dihy

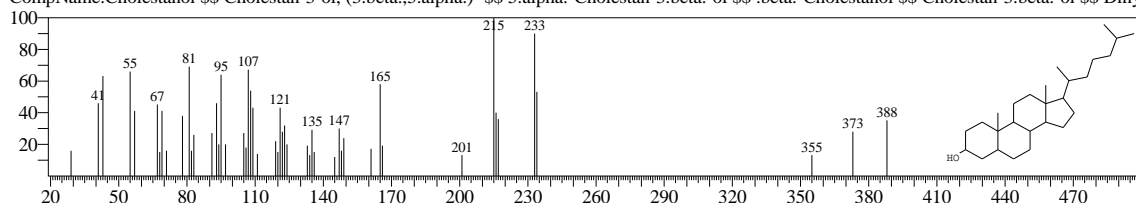

Hit#:3 Entry:163700 Library:NIST08.LIB

SI:78 Formula:C<sub>27</sub>H<sub>48</sub>O CAS:27409-41-2 MolWeight:388 RetIndex:2586

CompName:Cholestan-3-ol \$ Dihydrocholestenol \$ Dihydrocholesterol \$

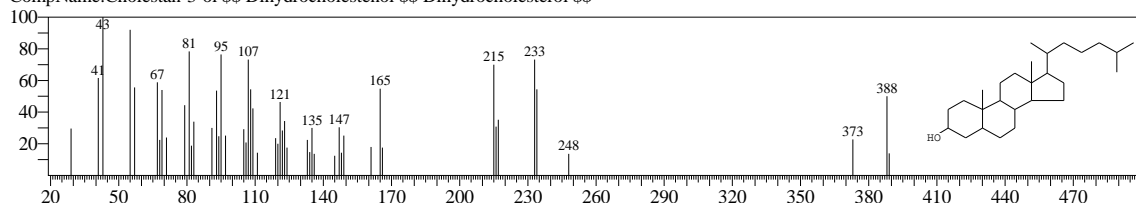

Hit#:4 Entry:163706 Library:NIST08.LIB

SI:77 Formula:C<sub>27</sub>H<sub>48</sub>O CAS:0-00-0 MolWeight:388 RetIndex:2586

CompName:4-Cholestanol

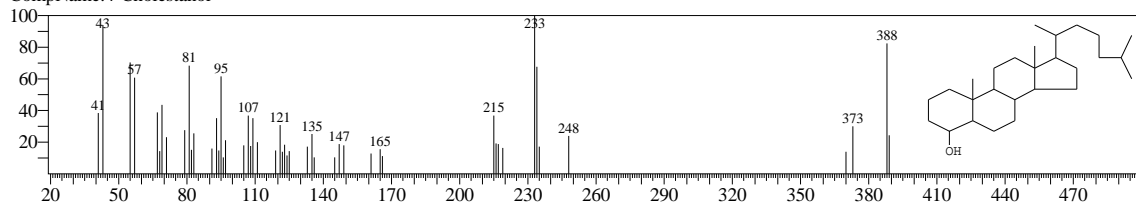

Hit#:5 Entry:27084 Library:NIST08s.LIB

SI:75 Formula:C<sub>27</sub>H<sub>48</sub>O CAS:360-68-9 MolWeight:388 RetIndex:2586

CompName:Cholestan-3-ol, (3.beta.,5.beta.)- \$\$ Coprostanol \$\$ Coprosterol \$\$ Koprosterin \$\$ Koprosterol \$\$ Stercorin \$\$ 3.beta.-Hydroxy-5.beta.-c

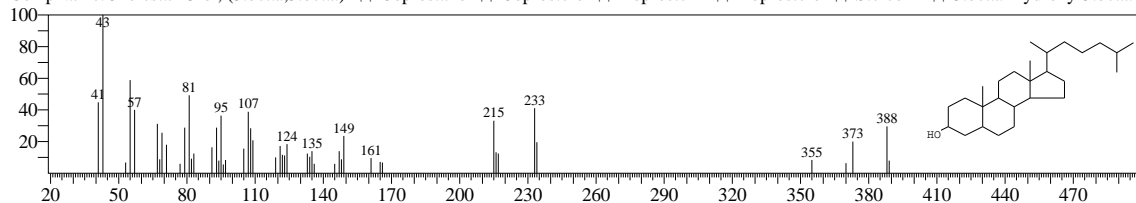

<< Target >>

Line#:32 R.Time:75.990(Scan#:14499) MassPeaks:342

RawMode:Averaged 75.985-75.995(14498-14500) BasePeak:95.10(1922)

BG Mode:Calc. from Peak Group 1 - Event 1

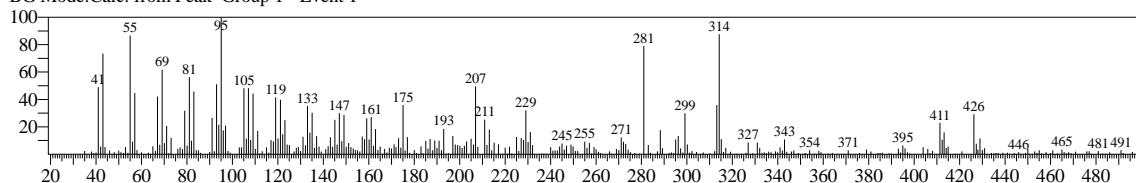

Hit#:1 Entry:174651 Library:NIST08.LIB

SI:74 Formula:C30H50O CAS:0-00-0 MolWeight:426 RetIndex:2750

CompName:Cyclopenta[a]cyclopropa[e]phenanthren-7-one, perhydro-1-(1,5-dimethylhexyl)-3a,6,6,12a-tetramethyl

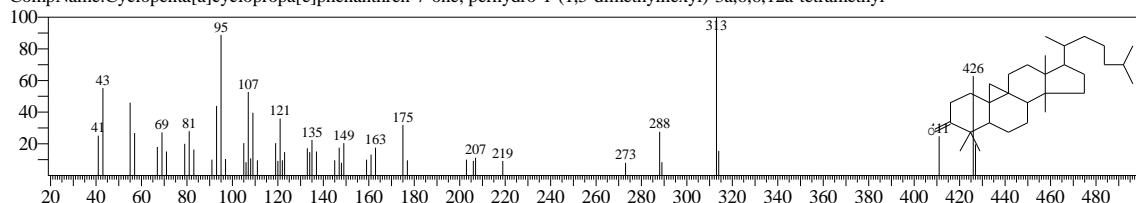

Hit#:2 Entry:171286 Library:NIST08.LIB

SI:73 Formula:C29H48O CAS:18472-36-1 MolWeight:412 RetIndex:2780

CompName:Stigmasta-5,24(28)-dien-3-ol, (3.beta.)- \$\$ Stigmasta-5,24(28)-dien-3.beta.-ol \$\$ .delta.5-Avenasterol \$\$ Stigmasta-5,24(28)-dien-3-ol \$\$

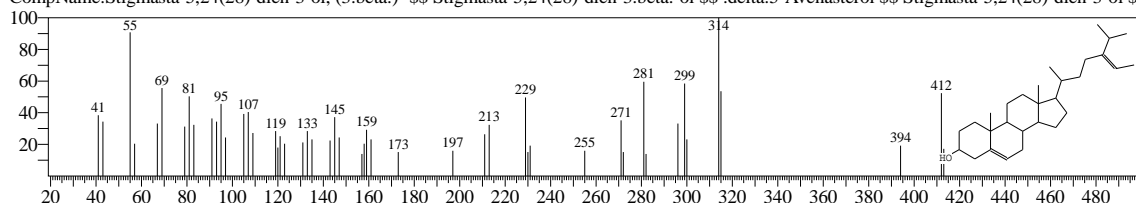

Hit#:3 Entry:162003 Library:NIST08.LIB

SI:71 Formula:C27H44O CAS:26753-93-5 MolWeight:384 RetIndex:2484

CompName:3.alpha.,5-Cyclo-5.alpha.-cholestan-2-one

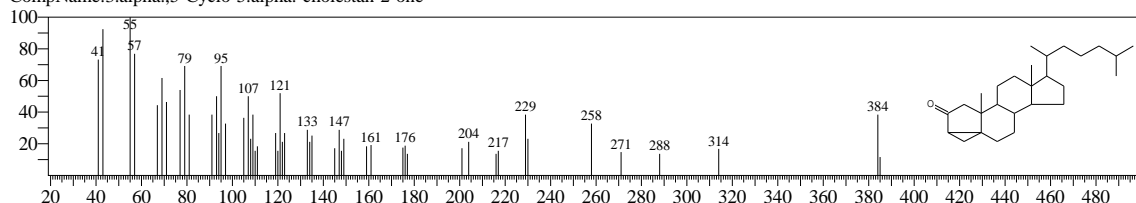

Hit#:4 Entry:179657 Library:NIST08.LIB

SI:71 Formula:C31H50O2 CAS:4651-46-1 MolWeight:454 RetIndex:2879

CompName:Stigmasta-7,22-dien-3-ol, acetate, (3.beta.,5.alpha.,22E)- \$5.alpha.-Stigmasta-7,22-dien-3.beta.-ol, acetate \$\$.alpha.-Spinasterol acetate

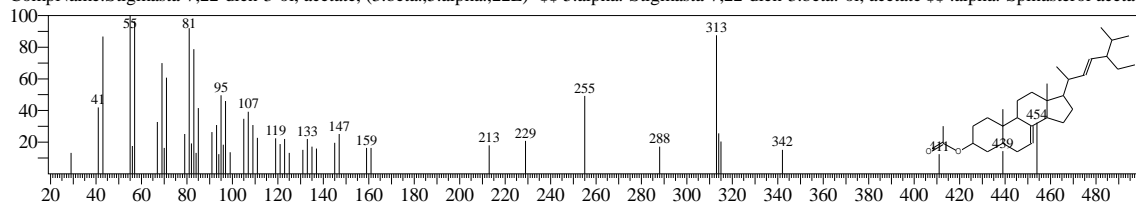

Hit#:5 Entry:178124 Library:NIST08.LIB

SI:71 Formula:C30H52O2 CAS:26525-84-8 MolWeight:444 RetIndex:2923

CompName:9,19-Cyclo-9.beta.-lanostane-3.beta.,25-diol \$5 Cycloartane-3.beta.,25-diol \$5 1-(5-Hydroxy-1,5-dimethylhexyl)-3a,6,6,12a-tetramethyl

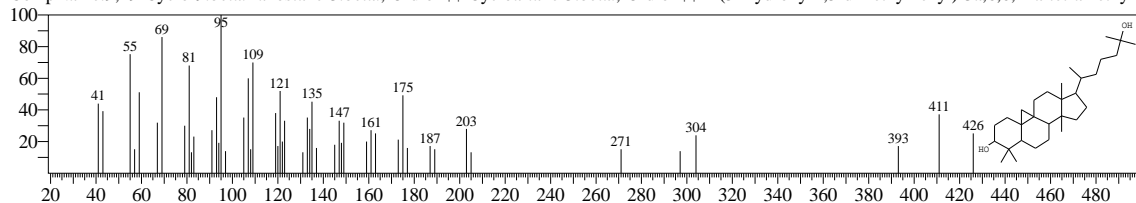

<< Target >>

Line#:33 R.Time:76.260(Scan#:14553) MassPeaks:353

RawMode:Averaged 76.255-76.265(14552-14554) BasePeak:95.05(15293)

BG Mode:Calc. from Peak Group 1 - Event 1

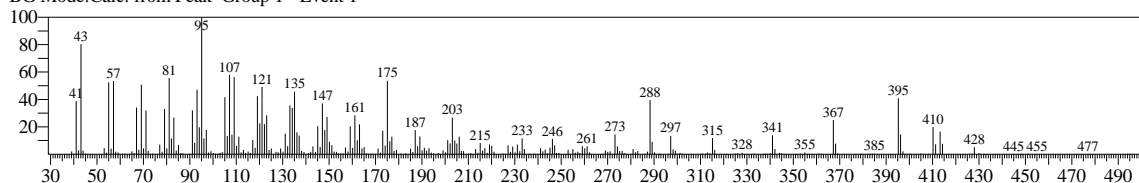

Hit#:1 Entry:183300 Library:NIST08.LIB

SI:83 Formula:C32H52O3 CAS:83110-15-0 MolWeight:484 RetIndex:3043

CompName:9,19-Cyclo-27-norlanostan-25-one, 3-(acetyloxy)-24-methyl-, (3.beta.,24R)- \$1-(1,4-Dimethyl-5-oxohexyl)-3a,6,6,12a-tetramethyltetra

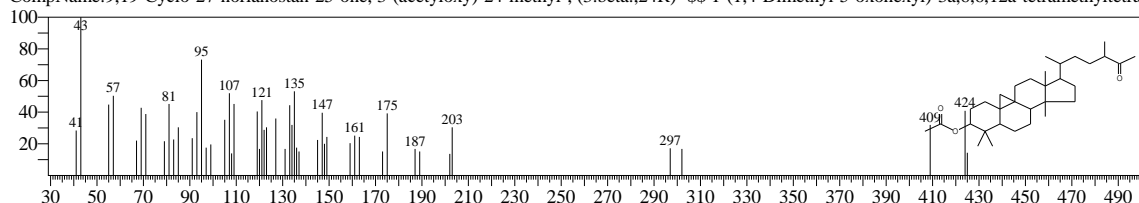

Hit#:2 Entry:178124 Library:NIST08.LIB

SI:82 Formula:C30H52O2 CAS:26525-84-8 MolWeight:444 RetIndex:2923

CompName:9,19-Cyclo-9.beta.-lanostane-3.beta.,25-diol \$Cycloartane-3.beta.,25-diol \$1-(5-Hydroxy-1,5-dimethylhexyl)-3a,6,6,12a-tetramethyltetra

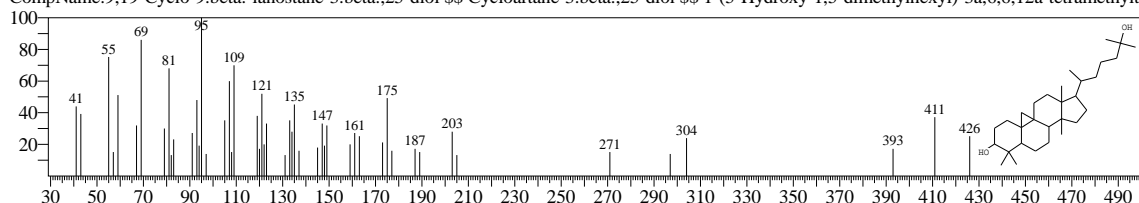

Hit#:3 Entry:177404 Library:NIST08.LIB

SI:81 Formula:C31H52O CAS:511-61-5 MolWeight:440 RetIndex:2834

CompName:9,19-Cyclolanost-25-en-3-ol, 24-methyl-, (3.beta.,24S)- \$9,19-Cyclo-9.beta.-lanost-25-en-3.beta.-ol, 24-methyl-, (24S)- \$Cyclolaure

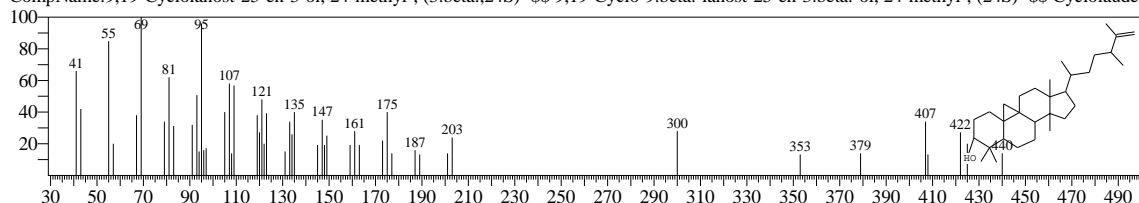

Hit#:4 Entry:168099 Library:NIST08.LIB

SI:81 Formula:C28H48O CAS:1912-66-9 MolWeight:400 RetIndex:2633

CompName:9,19-Cyclocholestan-3-ol, 14-methyl-, (3.beta.,5.alpha.)- \$9,19-Cyclo-5.alpha.,9.beta.-cholestan-3.beta.-ol, 14-methyl- \$Pollinastanol

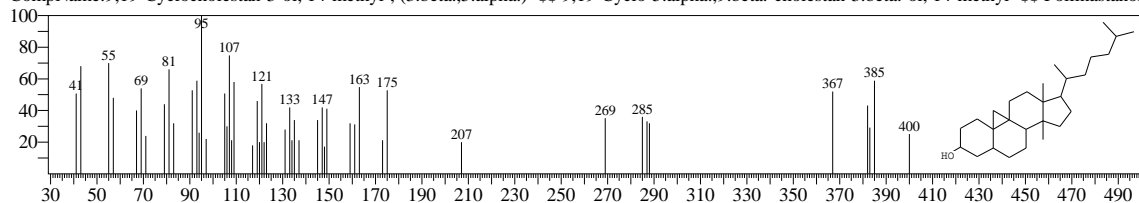

Hit#:5 Entry:177403 Library:NIST08.LIB

SI:81 Formula:C31H52O CAS:1449-09-8 MolWeight:440 RetIndex:2834

CompName:9,19-Cyclolanostan-3-ol, 24-methylene-, (3.beta.)- \$9,19-Cyclo-9.beta.-lanostan-3.beta.-ol, 24-methylene- \$24-Methylenecycloartano

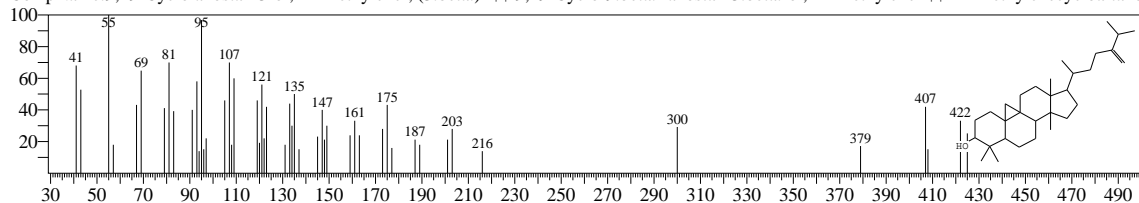

<< Target >>

Line#:34 R.Time:76.570(Scan#:14615) MassPeaks:332

RawMode:Averaged 76.565-76.575(14614-14616) BasePeak:124.10(4996)

BG Mode:Calc. from Peak Group 1 - Event 1

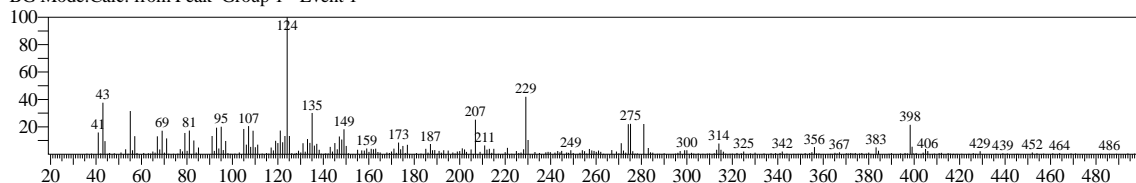

Hit#:1 Entry:162012 Library:NIST08.LIB

SI:81 Formula:C<sub>27</sub>H<sub>44</sub>O CAS:601-57-0 MolWeight:384 RetIndex:2580

CompName:Cholest-4-en-3-one \$\$ 3-Oxocholest-4-ene \$\$ 4-Cholest-3-one \$\$ Cholestenone \$\$ .delta.4-Cholest-3-one \$\$ .delta.-4-Cholest-3-one

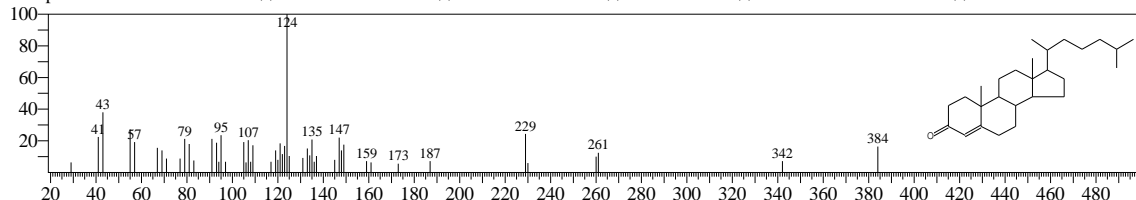

Hit#:2 Entry:171279 Library:NIST08.LIB

SI:76 Formula:C<sub>29</sub>H<sub>48</sub>O CAS:1058-61-3 MolWeight:412 RetIndex:2714

CompName:Stigmast-4-en-3-one \$\$ 4-Stigmast-3-one \$\$ Sitostenone \$\$ .DELTA.4-Sitosterol-3-one \$\$

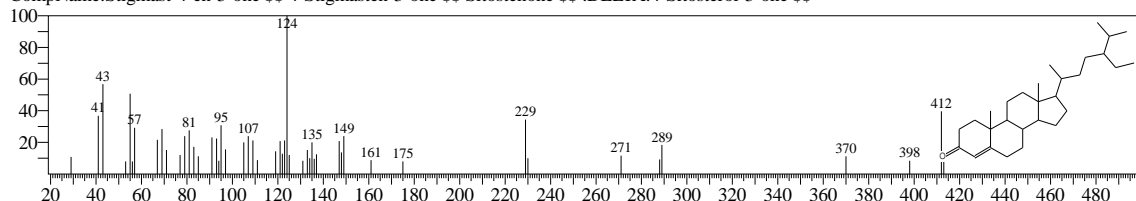

Hit#:3 Entry:122195 Library:NIST08.LIB

SI:75 Formula:C<sub>21</sub>H<sub>30</sub>O<sub>2</sub> CAS:3795-19-5 MolWeight:314 RetIndex:2247

CompName:Pregn-4-ene-3,20-dione, (8.alpha.,10.alpha.)- \$\$ 8.alpha.,10.alpha.-Pregn-4-ene-3,20-dione \$\$ 8.alpha.,10.alpha.-Progesterone \$\$ Pregn-4-ene-3,20-dione

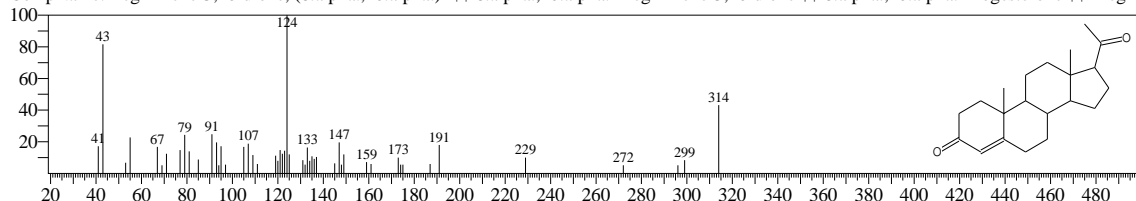

Hit#:4 Entry:122194 Library:NIST08.LIB

SI:71 Formula:C<sub>21</sub>H<sub>30</sub>O<sub>2</sub> CAS:3562-13-8 MolWeight:314 RetIndex:2247

CompName:Pregn-4-ene-3,20-dione, (10.alpha.)- \$\$ 10.alpha.-Pregn-4-ene-3,20-dione \$\$ Pyroprogesterone \$\$ 10.alpha.-Progesterone \$\$ Pregn-4-ene-3,20-dione

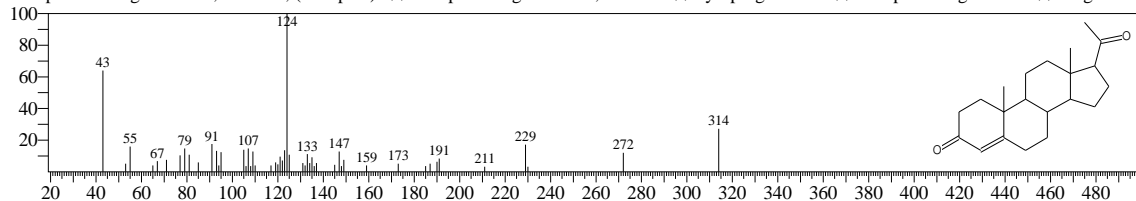

Hit#:5 Entry:122193 Library:NIST08.LIB

SI:71 Formula:C<sub>21</sub>H<sub>30</sub>O<sub>2</sub> CAS:2755-10-4 MolWeight:314 RetIndex:2247

CompName:Pregn-4-ene-3,20-dione, (9.beta.,10.alpha.)- \$\$ 9.beta.,10.alpha.-Pregn-4-ene-3,20-dione \$\$ Lumiprogesterone \$\$ Retroprogesterone \$\$

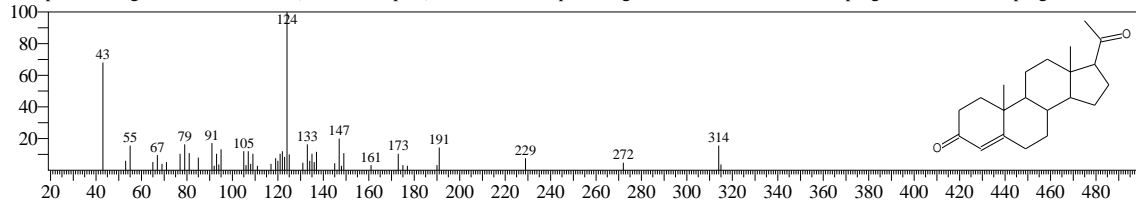

<< Target >>

Line#:35 R.Time:76.720(Scan#:14645) MassPeaks:279

RawMode:Averaged 76.715-76.725(14644-14646) BasePeak:231.10(3164)

BG Mode:Calc. from Peak Group 1 - Event 1

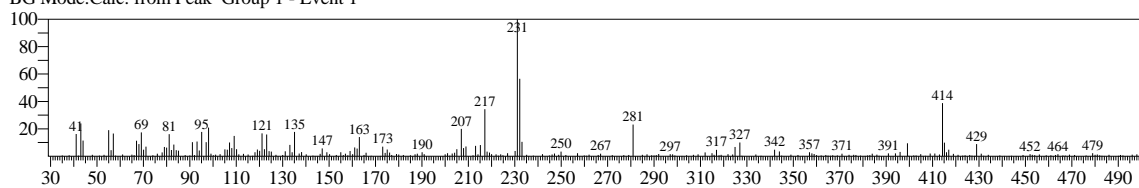

Hit#:1 Entry:27034 Library:NIST08s.LIB

SI:71 Formula:C<sub>27</sub>H<sub>46</sub>O CAS:15600-08-5 MolWeight:386 RetIndex:2569

CompName:Cholestan-3-one \$\$ 3-Oxcholestane \$\$ Cholestanone \$\$

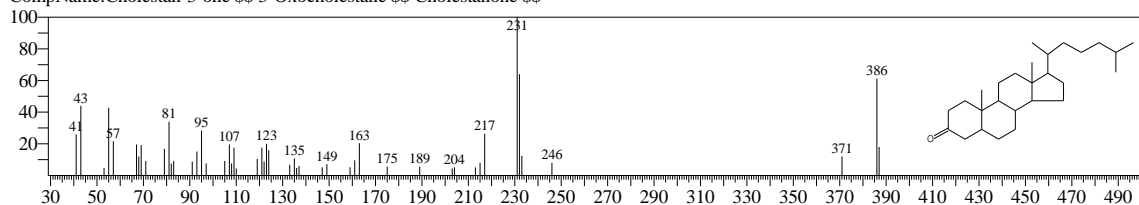

<< Target >>

Line#:36 R.Time:76.895(Scan#:14680) MassPeaks:337

RawMode:Averaged 76.890-76.900(14679-14681) BasePeak:69.05(4639)

BG Mode:Calc. from Peak Group 1 - Event 1

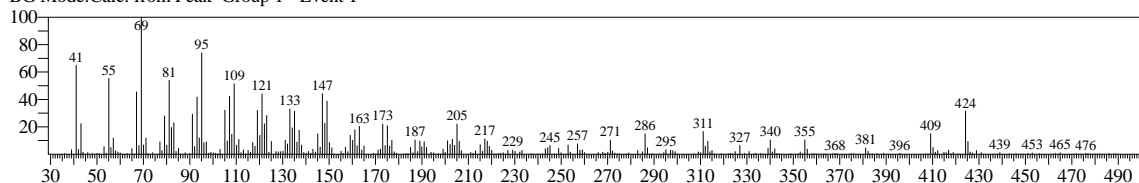

Hit#:1 Entry:174622 Library:NIST08.LIB

SI:84 Formula:C30H50O CAS:469-38-5 MolWeight:426 RetIndex:2816

CompName:9,19-Cyclolanost-24-en-3-ol, (3.beta.)- \$ 9,19-Cyclo-9.beta.-lanost-24-en-3.beta.-ol \$ Cycloartenol \$ Handianol \$ 1-(1,5-Dimethyl-4

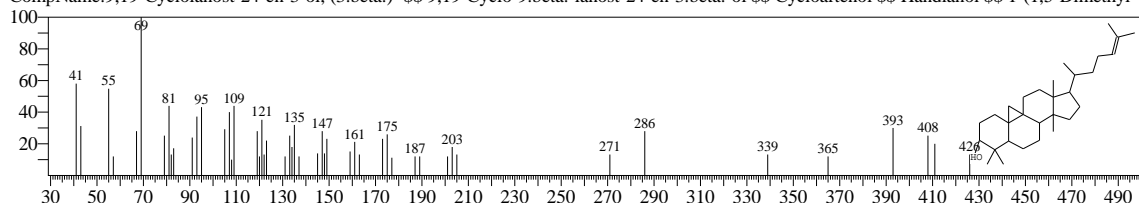

Hit#:2 Entry:183297 Library:NIST08.LIB

SI:83 Formula:C32H52O3 CAS:54482-56-3 MolWeight:484 RetIndex:3071

CompName:9,19-Cyclolanost-23-ene-3,25-diol, 3-acetate, (3.beta.,23E)- \$ 1-[(3E)-5-Hydroxy-1,5-dimethyl-3-hexenyl]-3a,6,6,12a-tetramethyltetrad

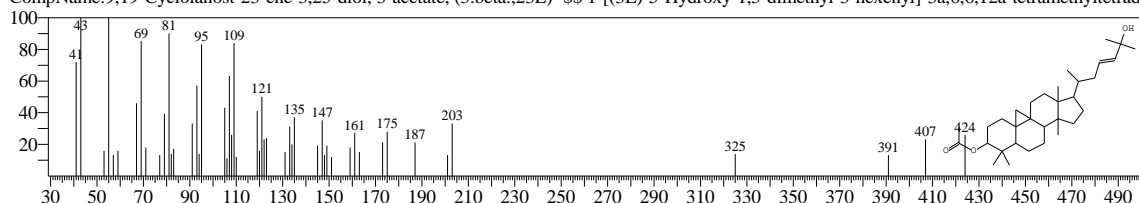

Hit#:3 Entry:178124 Library:NIST08.LIB

SI:83 Formula:C30H52O2 CAS:26525-84-8 MolWeight:444 RetIndex:2923

CompName:9,19-Cyclo-9.beta.-lanostane-3.beta.,25-diol \$ Cycloartane-3.beta.,25-diol \$ 1-(5-Hydroxy-1,5-dimethylhexenyl)-3a,6,6,12a-tetramethylt

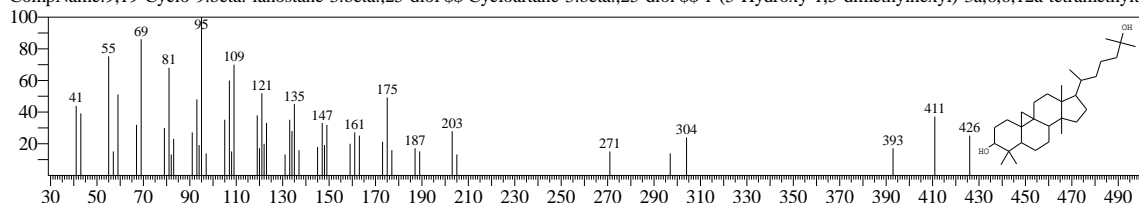

Hit#:4 Entry:177792 Library:NIST08.LIB

SI:82 Formula:C30H50O2 CAS:54482-57-4 MolWeight:442 RetIndex:2931

CompName:9,19-Cyclolanost-23-ene-3,25-diol, (3.beta.,23E)- \$ 1-[(3E)-5-Hydroxy-1,5-dimethyl-3-hexenyl]-3a,6,6,12a-tetramethyltetradecahydro-1

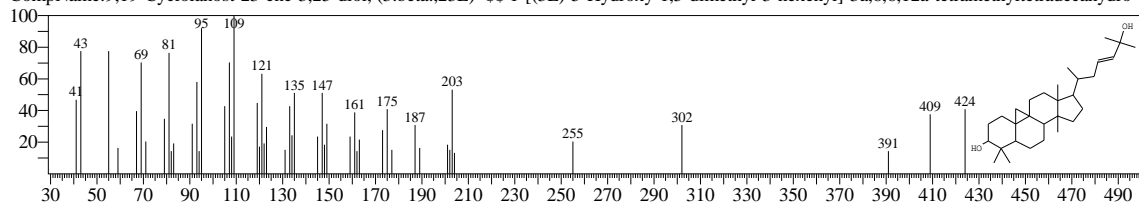

Hit#:5 Entry:177404 Library:NIST08.LIB

SI:81 Formula:C31H52O CAS:511-61-5 MolWeight:440 RetIndex:2834

CompName:9,19-Cyclolanost-25-en-3-ol, 24-methyl-, (3.beta.,24S)- \$ 9,19-Cyclo-9.beta.-lanost-25-en-3.beta.-ol, 24-methyl-, (24S)- \$ Cyclolaure

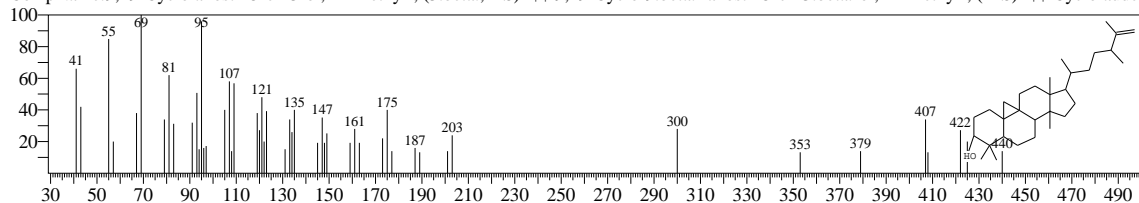

<< Target >>

Line#:37 R.Time:77.195(Scan#:14740) MassPeaks:380

RawMode:Averaged 77.190-77.200(14739-14741) BasePeak:69.05(47203)

BG Mode:Calc. from Peak Group 1 - Event 1

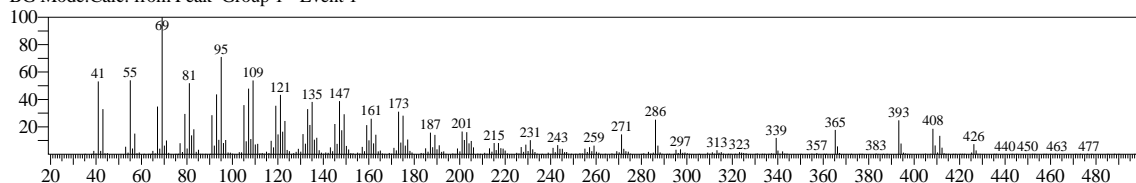

Hit#:1 Entry:174622 Library:NIST08.LIB

SI:94 Formula:C30H50O CAS:469-38-5 MolWeight:426 RetIndex:2816

CompName:9,19-Cyclolanost-24-en-3-ol, (3.beta.)- \$\$ 9,19-Cyclo-9.beta.-lanost-24-en-3.beta.-ol \$\$ Cycloartenol \$\$ Handianol \$\$ 1-(1,5-Dimethyl-4

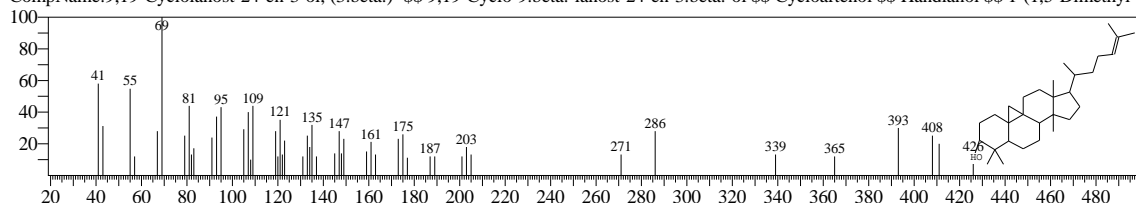

Hit#:2 Entry:178124 Library:NIST08.LIB

SI:87 Formula:C30H52O2 CAS:26525-84-8 MolWeight:444 RetIndex:2923

CompName:9,19-Cyclo-9.beta.-lanostane-3.beta.,25-diol \$\$ Cycloartane-3.beta.,25-diol \$\$ 1-(5-Hydroxy-1,5-dimethylhexyl)-3a,6,6,12a-tetramethyltr

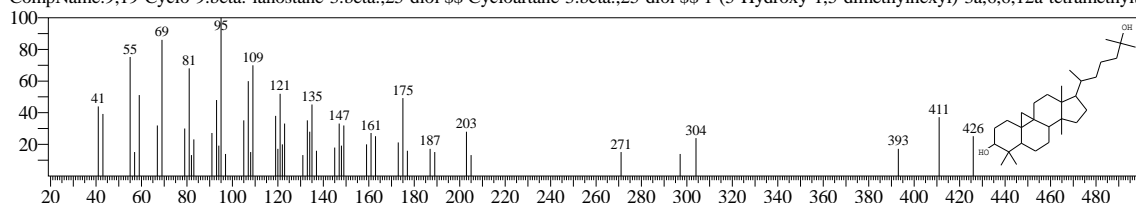

Hit#:3 Entry:177404 Library:NIST08.LIB

SI:85 Formula:C31H52O CAS:511-61-5 MolWeight:440 RetIndex:2834

CompName:9,19-Cyclolanost-25-en-3-ol, 24-methyl-, (3.beta.,24S)- \$\$ 9,19-Cyclo-9.beta.-lanost-25-en-3.beta.-ol, 24-methyl-, (24S)- \$\$ Cyclolauder

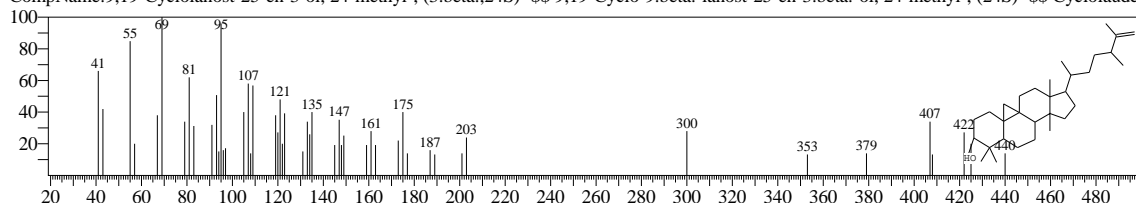

Hit#:4 Entry:181511 Library:NIST08.LIB

SI:84 Formula:C32H52O2 CAS:10376-42-8 MolWeight:468 RetIndex:2900

CompName:9,19-Cycloergost-24(28)-en-3-ol, 4,14-dimethyl-, acetate, (3.beta.,4.alpha.,5.alpha.)- \$\$ 9,19-Cycloergost-24(28)-en-3-ol, 4,14-dimethyl-,

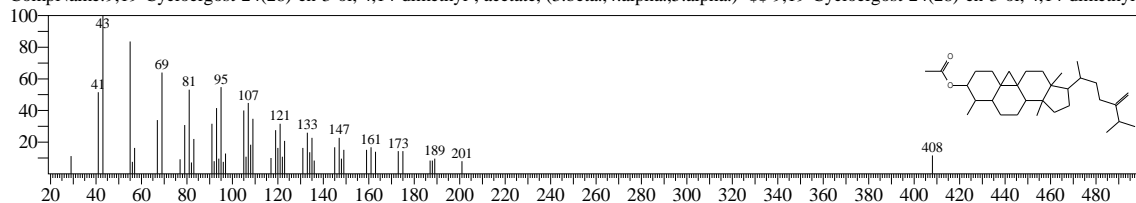

Hit#:5 Entry:177403 Library:NIST08.LIB

SI:83 Formula:C31H52O CAS:1449-09-8 MolWeight:440 RetIndex:2834

CompName:9,19-Cyclolanostan-3-ol, 24-methylene-, (3.beta.)- \$\$ 9,19-Cyclo-9.beta.-lanostan-3.beta.-ol, 24-methylene- \$\$ 24-Methylenecycloartano

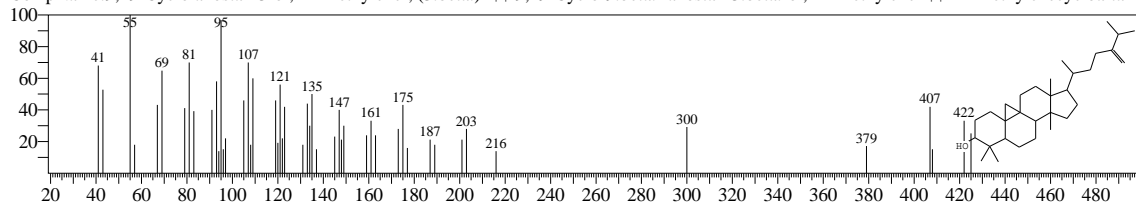

<< Target >>

Line#:38 R.Time:78.100(Scan#:14921) MassPeaks:306

RawMode:Averaged 78.095-78.105(14920-14922) BasePeak:206.95(2260)

BG Mode:Calc. from Peak Group 1 - Event 1

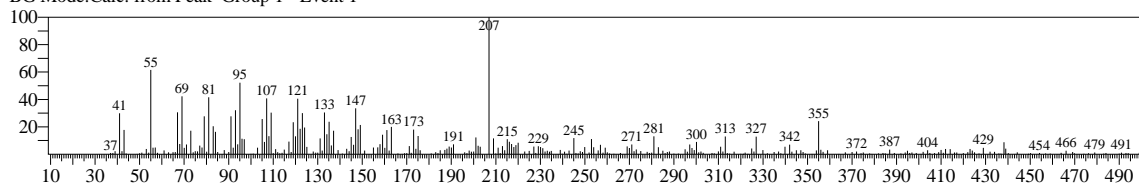

Hit#:1 Entry:181511 Library:NIST08.LIB

SI:77 Formula:C32H52O2 CAS:10376-42-8 MolWeight:468 RetIndex:2900

CompName:9,19-Cycloergost-24(28)-en-3-ol, 4,14-dimethyl-, acetate, (3.beta.,4.alpha.,5.alpha.)- \$\$\$ 9,19-Cycloergost-24(28)-en-3-ol, 4,14-dimethyl-,

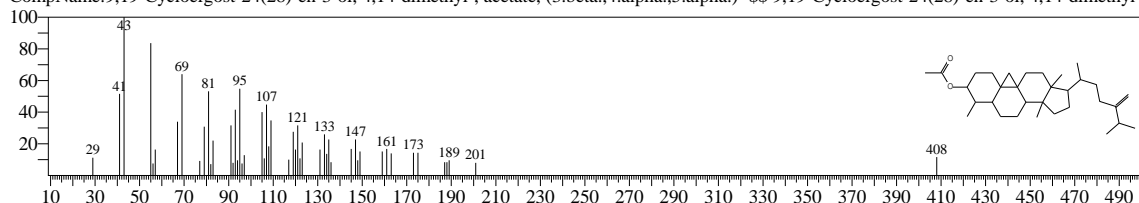

Hit#:2 Entry:181512 Library:NIST08.LIB

SI:75 Formula:C32H52O2 CAS:1259-10-5 MolWeight:468 RetIndex:2956

CompName:9,19-Cyclolanost-24-en-3-ol, acetate, (3.beta.)- \$\$\$ 9,19-Cyclo-9.beta.-lanost-24-en-3.beta.-ol, acetate \$\$\$ Cycloartenol acetate \$\$\$ Cycloart

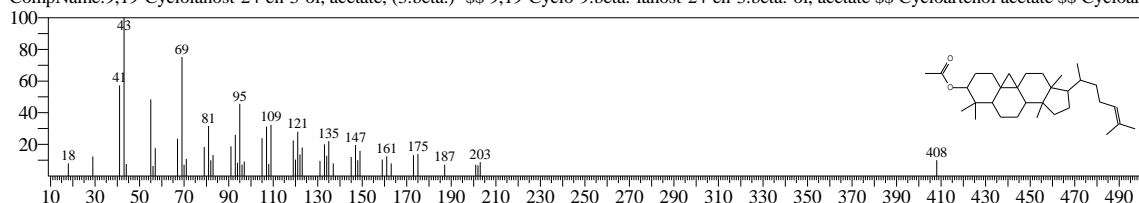

Hit#:3 Entry:174617 Library:NIST08.LIB

SI:73 Formula:C30H50O CAS:469-39-6 MolWeight:426 RetIndex:2760

CompName:9,19-Cycloergost-24(28)-en-3-ol, 4,14-dimethyl-, (3.beta.,4.alpha.,5.alpha.)- \$\$\$ 9,19-Cyclo-5.alpha.,9.beta.-ergost-24(28)-en-3.beta.-ol, 4

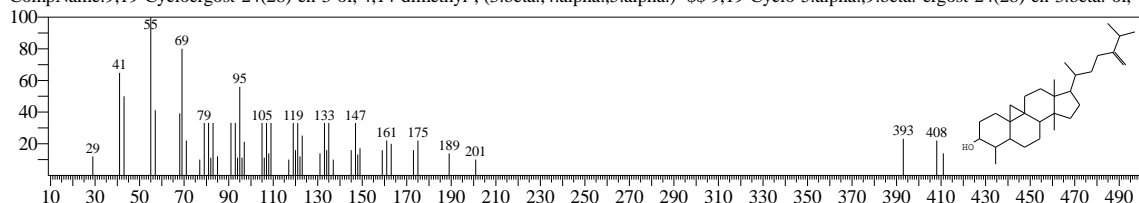

Hit#:4 Entry:174622 Library:NIST08.LIB

SI:73 Formula:C30H50O CAS:469-38-5 MolWeight:426 RetIndex:2816

CompName:9,19-Cyclolanost-24-en-3-ol, (3.beta.)- \$\$\$ 9,19-Cyclo-9.beta.-lanost-24-en-3.beta.-ol \$\$\$ Cycloartenol \$\$\$ Handianol \$\$\$ 1-(1,5-Dimethyl-4

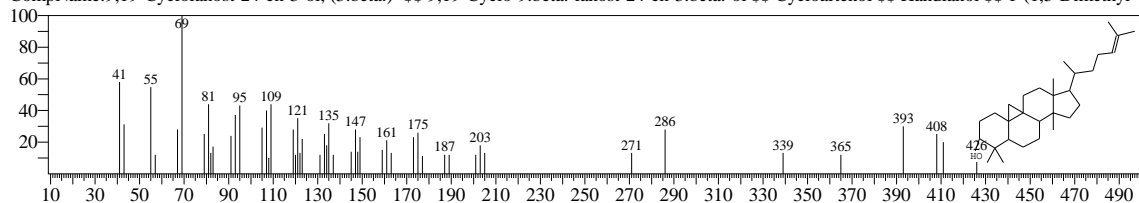

Hit#:5 Entry:177404 Library:NIST08.LIB

SI:72 Formula:C31H52O CAS:511-61-5 MolWeight:440 RetIndex:2834

CompName:9,19-Cyclolanost-25-en-3-ol, 24-methyl-, (3.beta.,24S)- \$\$\$ 9,19-Cyclo-9.beta.-lanost-25-en-3.beta.-ol, 24-methyl-, (24S)- \$\$\$ Cyclolauder

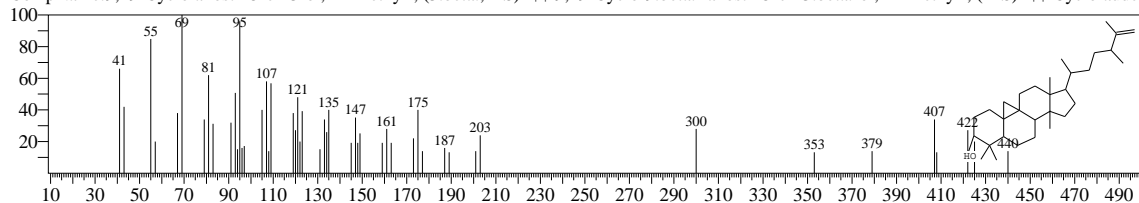

<< Target >>

Line#:39 R.Time:78.430(Scan#:14987) MassPeaks:386

RawMode:Averaged 78.425-78.435(14986-14988) BasePeak:124.10(86667)

BG Mode:Calc. from Peak Group 1 - Event 1

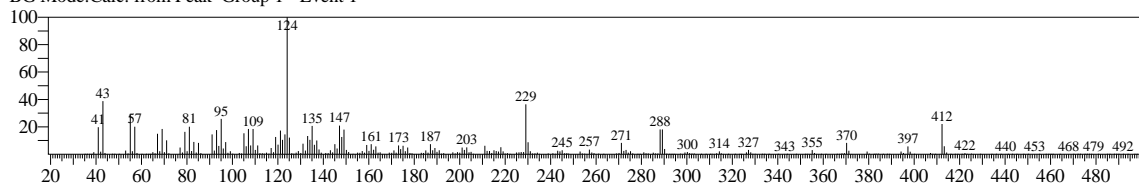

Hit#:1 Entry:171279 Library:NIST08.LIB

SI:88 Formula:C<sub>29</sub>H<sub>48</sub>O CAS:1058-61-3 MolWeight:412 RetIndex:2714

CompName:Stigmast-4-en-3-one \$\$ 4-Stigmasten-3-one \$\$ Sitostenone \$\$ .DELTA.4-Sitosterol-3-one \$\$

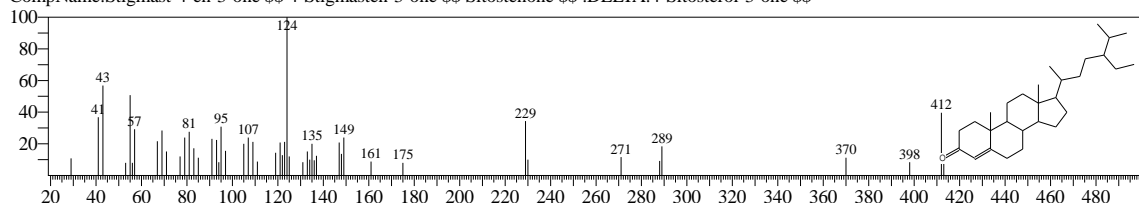

Hit#:2 Entry:162012 Library:NIST08.LIB

SI:87 Formula:C<sub>27</sub>H<sub>44</sub>O CAS:601-57-0 MolWeight:384 RetIndex:2580

CompName:Cholest-4-en-3-one \$\$ 3-Oxocholest-4-ene \$\$ 4-Cholesten-3-one \$\$ Cholestenone \$\$ .delta.4-Cholesten-3-one \$\$ .delta.4-Cholesten-3-one

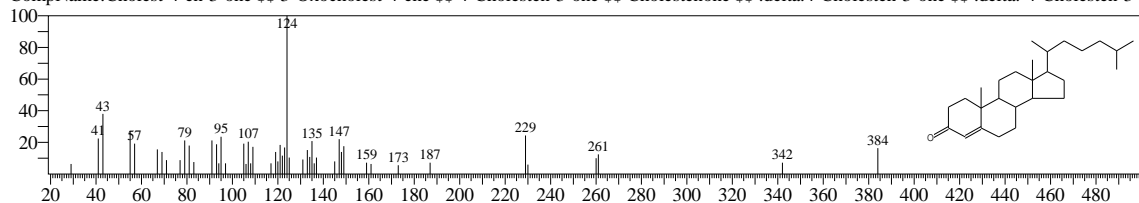

Hit#:3 Entry:122195 Library:NIST08.LIB

SI:78 Formula:C<sub>21</sub>H<sub>30</sub>O<sub>2</sub> CAS:3795-19-5 MolWeight:314 RetIndex:2247

CompName:Pregn-4-ene-3,20-dione, (8.alpha.,10.alpha.)- \$\$ 8.alpha.,10.alpha.-Pregn-4-ene-3,20-dione \$\$ 8.alpha.,10.alpha.-Progesterone \$\$ Pregn-4-ene-3,20-dione

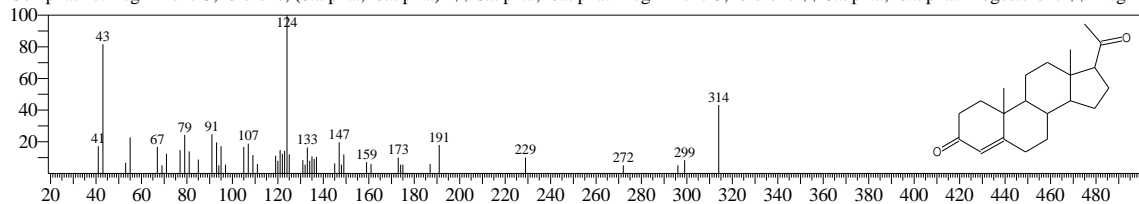

Hit#:4 Entry:177771 Library:NIST08.LIB

SI:78 Formula:C<sub>29</sub>H<sub>46</sub>O<sub>3</sub> CAS:5721-91-5 MolWeight:442 RetIndex:3074

CompName:Testosterone Decanoate \$\$ Test Decanoate \$\$ Androst-4-en-3-one, 17-[(1-oxodecyl)oxy]-, (17.beta.)- \$\$

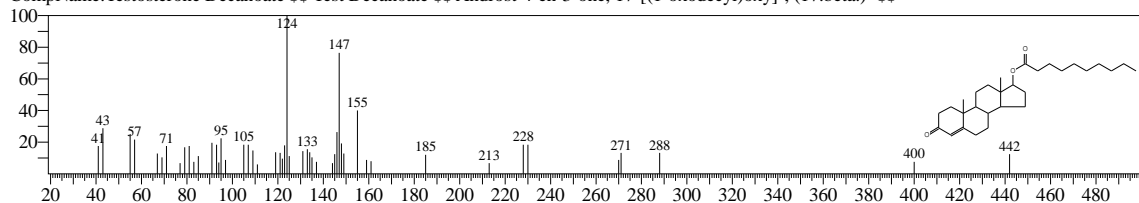

Hit#:5 Entry:179947 Library:NIST08.LIB

SI:77 Formula:C<sub>30</sub>H<sub>48</sub>O<sub>3</sub> CAS:5949-44-0 MolWeight:456 RetIndex:3173

CompName:Androst-4-en-3-one, 17-[(1-oxoundecyl)oxy]-, (17.beta.)- \$\$ Testosterone, undecanoate \$\$ 5.alpha.-Androstan-3-one, 17-.beta.-hydroxy-

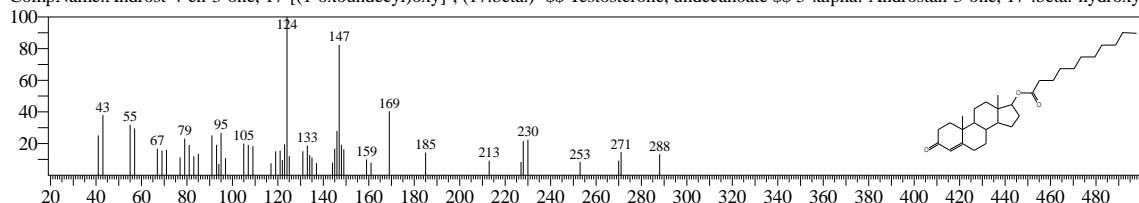

<< Target >>

Line#:40 R.Time:79.025(Scan#:15106) MassPeaks:333

RawMode:Averaged 79.020-79.030(15105-15107) BasePeak:136.10(1866)

BG Mode:Calc. from Peak Group 1 - Event 1

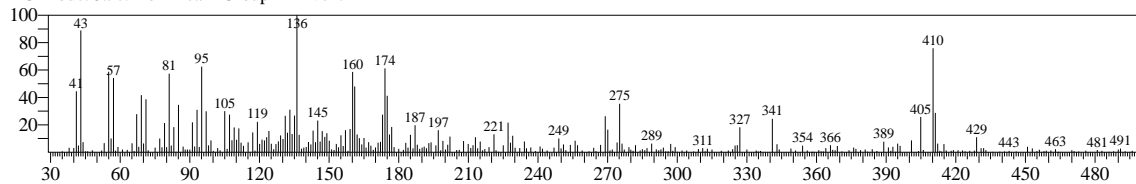

Hit#:1 Entry:170729 Library:NIST08.LIB

SI:70 Formula:C<sub>29</sub>H<sub>46</sub>O CAS:2034-72-2 MolWeight:410 RetIndex:2696

CompName:Stigmasta-3,5-dien-7-one \$\$ .beta.-Saccharostenone \$\$ Tremulone \$\$ 3,5-Stigmastadien-7-one \$\$

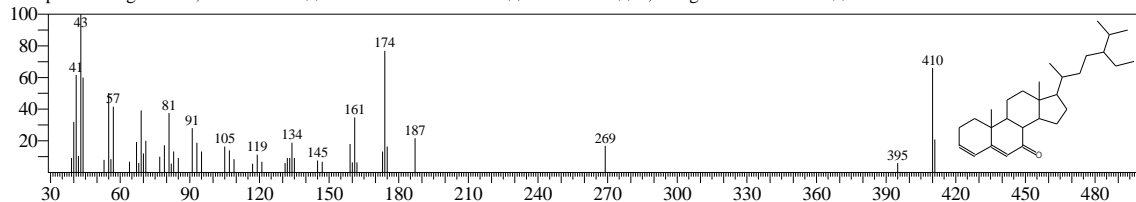

<< Target >>

Line#:41 R.Time:79.365(Scan#:15174) MassPeaks:342

RawMode:Averaged 79.360-79.370(15173-15175) BasePeak:189.10(6009)

BG Mode:Calc. from Peak Group 1 - Event 1

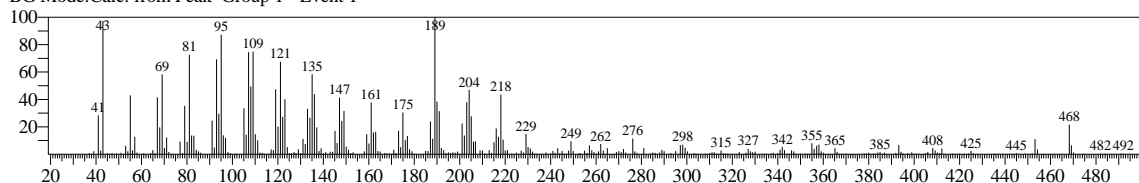

Hit#:1 Entry:181513 Library:NIST08.LIB

SI:91 Formula:C<sub>32</sub>H<sub>52</sub>O<sub>2</sub> CAS:1617-68-1 MolWeight:468 RetIndex:2987

CompName:Lup-20(29)-en-3-ol, acetate, (3.beta.)- \$ \$ Lup-20(29)-en-3.beta.-ol, acetate \$ \$ Lupenyl acetate \$ \$ Lupeol acetate \$ \$ Lupeyl acetate \$ \$ 3-

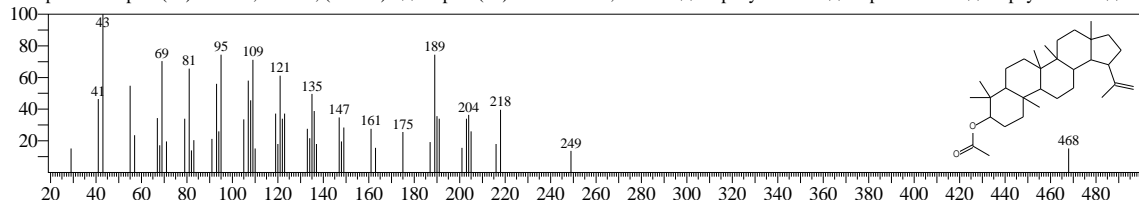

Hit#:2 Entry:27739 Library:NIST08s.LIB

SI:84 Formula:C<sub>30</sub>H<sub>50</sub>O<sub>2</sub> CAS:473-98-3 MolWeight:442 RetIndex:3090

CompName:Betulin \$ \$ Lup-20(29)-ene-3,28-diol, (3.beta.)- \$ \$ Lup-20(29)-ene-3.beta.,28-diol \$ \$ Betuline \$ \$ Betulinol \$ \$ Betulol \$ \$ Lup-20(30)-ene-

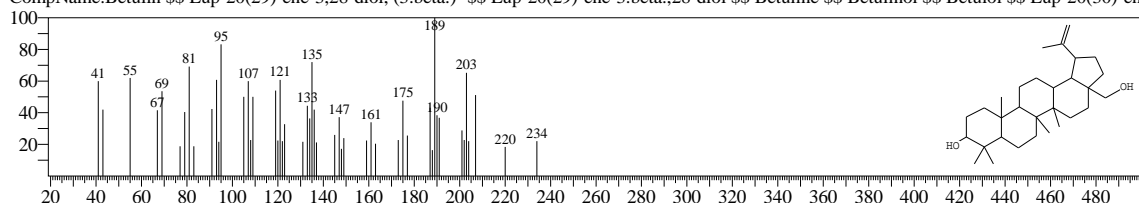

Hit#:3 Entry:174613 Library:NIST08.LIB

SI:81 Formula:C<sub>30</sub>H<sub>50</sub>O CAS:545-47-1 MolWeight:426 RetIndex:2848

CompName:Lupeol \$ \$ Lup-20(29)-en-3-ol, (3.beta.)- \$ \$ Lup-20(29)-en-3.beta.-ol \$ \$ .beta.-Viscol \$ \$ Clerodol \$ \$ Fagarasterol \$ \$ Fagarsterol \$ \$ Lup

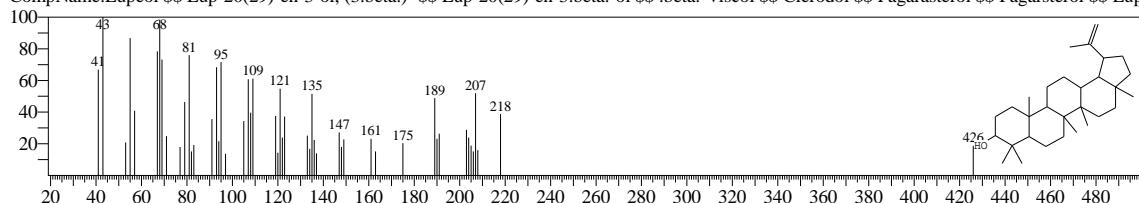

Hit#:4 Entry:85005 Library:NIST08.LIB

SI:80 Formula:C<sub>18</sub>H<sub>30</sub>O CAS:0-00-0 MolWeight:262 RetIndex:1619

CompName:14-Oxatricyclo[9.2.1.0(1,10)]tetradecane, 2,6,6,10,11-pentamethyl-

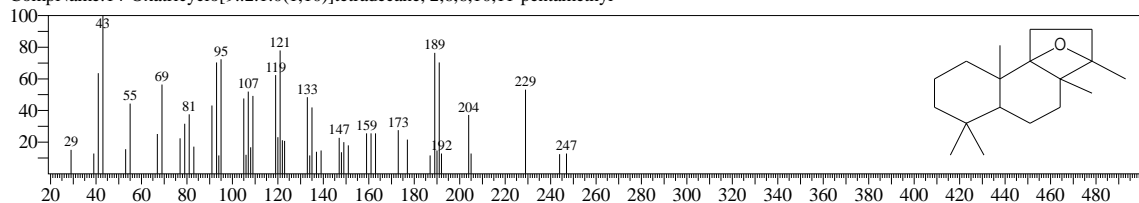

Hit#:5 Entry:177792 Library:NIST08.LIB

SI:79 Formula:C<sub>30</sub>H<sub>50</sub>O<sub>2</sub> CAS:54482-57-4 MolWeight:442 RetIndex:2931

CompName:9,19-Cyclolanost-23-ene-3,25-diol, (3.beta.,23E)- \$ \$ 1-[(3E)-5-Hydroxy-1,5-dimethyl-3-hexenyl]-3a,6,6,12a-tetramethyltetradecahydro-1

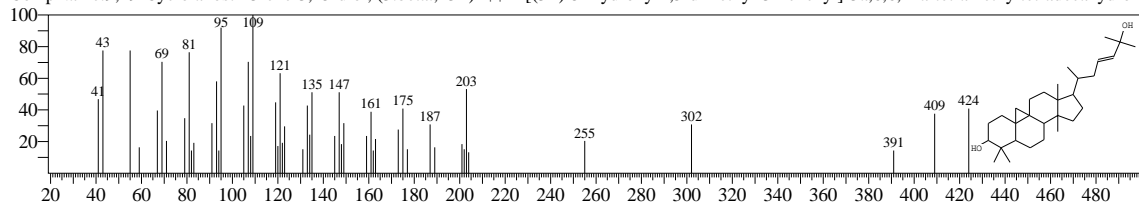

<< Target >>

Line#:42 R.Time:79.865(Scan#:15274) MassPeaks:386

RawMode:Averaged 79.860-79.870(15273-15275) BasePeak:43.00(13371)

BG Mode:Calc. from Peak Group 1 - Event 1

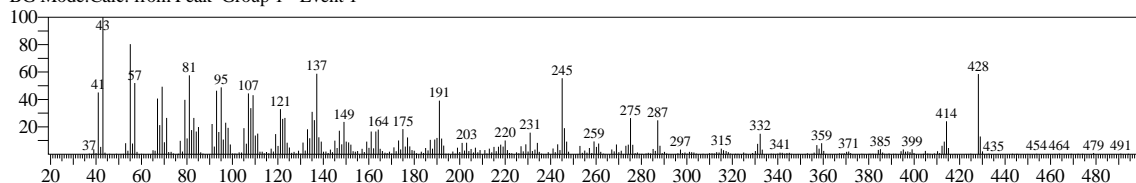

Hit#:1 Entry:175085 Library:NIST08.LIB

SI:82 Formula:C<sub>29</sub>H<sub>48</sub>O<sub>2</sub> CAS:22149-69-5 MolWeight:428 RetIndex:2875

CompName:Stigmastane-3,6-dione, (5.alpha.)- \$\$ 5.alpha.-Stigmastane-3,6-dione \$\$ Stigmastane-3,6-dione # \$\$

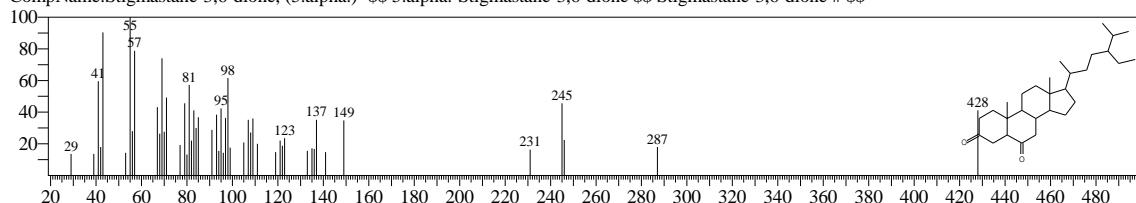

Hit#:2 Entry:116564 Library:NIST08.LIB

SI:78 Formula:C<sub>20</sub>H<sub>34</sub>O<sub>2</sub> CAS:7220-78-2 MolWeight:306 RetIndex:2400

CompName:4,8,13-Cyclotetradecatriene-1,3-diol, 1,5,9-trimethyl-12-(1-methylethyl)- \$\$ FW 306 \$\$ 4,8,13-Duvatriene-1,3-Diol \$\$ 12-Isopropyl-1,5,

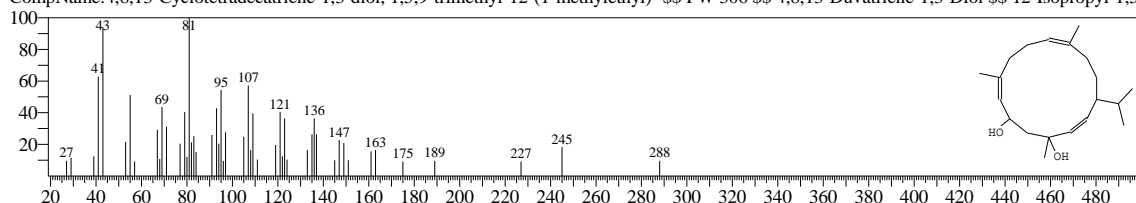

Hit#:3 Entry:171858 Library:NIST08.LIB

SI:78 Formula:C<sub>29</sub>H<sub>50</sub>O CAS:2097-85-0 MolWeight:414 RetIndex:2704

CompName:Cholestan-3-one, 4,4-dimethyl-, (5.alpha.)- \$\$ 5.alpha.-Cholestan-3-one, 4,4-dimethyl- \$\$ 4,4-Dimethyl-5.alpha.-cholestan-3-one \$\$ 4,

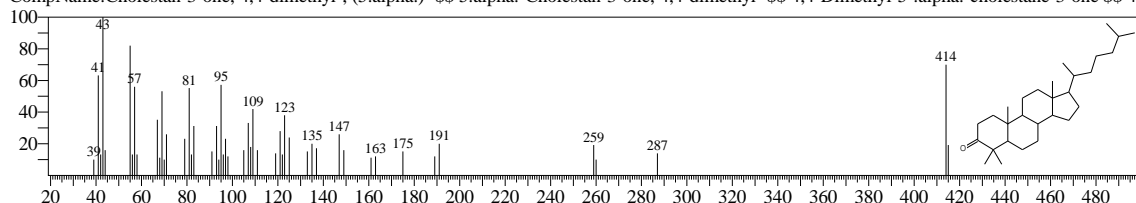

Hit#:4 Entry:175097 Library:NIST08.LIB

SI:76 Formula:C<sub>30</sub>H<sub>52</sub>O CAS:0-00-0 MolWeight:428 RetIndex:2777

CompName:17-(1,5-Dimethyl-hexyl)-4,4,9,13,14-pentamethylhexadecahydrocyclopenta[a]phenanthren-3-one

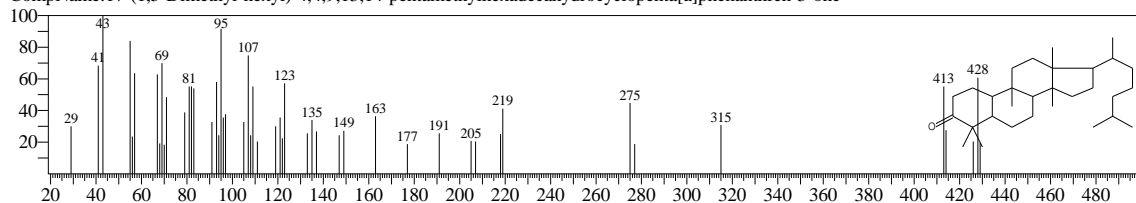

Hit#:5 Entry:186800 Library:NIST08.LIB

SI:75 Formula:C<sub>37</sub>H<sub>76</sub>O CAS:105794-58-9 MolWeight:536 RetIndex:3942

CompName:1-Heptatriacontanol \$\$ 1-Heptatriacontanol # \$\$

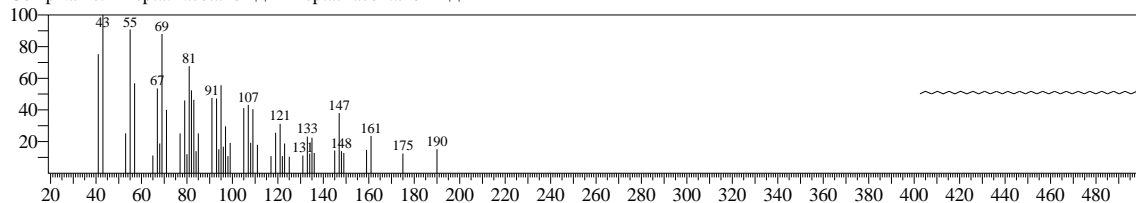

<< Target >>

Line#43 R.Time:81.645(Scan#:15630) MassPeaks:413

RawMode:Averaged 81.640-81.650(15629-15631) BasePeak:43.05(66770)

BG Mode:Calc. from Peak Group 1 - Event 1

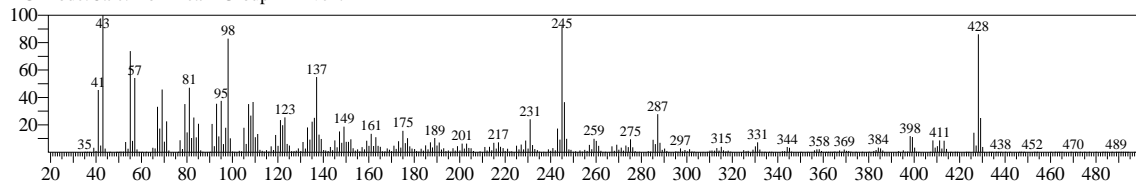

Hit#1 Entry:175085 Library:NIST08.LIB

SI:82 Formula:C<sub>29</sub>H<sub>48</sub>O<sub>2</sub> CAS:22149-69-5 MolWeight:428 RetIndex:2875

CompName:Stigmastane-3,6-dione, (5.alpha.)- \$\$ 5.alpha.-Stigmastane-3,6-dione \$\$ Stigmastane-3,6-dione # \$\$



Hit#2 Entry:116564 Library:NIST08.LIB

SI:74 Formula:C<sub>20</sub>H<sub>34</sub>O<sub>2</sub> CAS:7220-78-2 MolWeight:306 RetIndex:2400

CompName:4,8,13-Cyclotetradecatriene-1,3-diol, 1,5,9-trimethyl-12-(1-methylethyl)- \$\$ FW 306 \$\$ 4,8,13-Duvatriene-1,3-Diol \$\$ 12-Isopropyl-1,5,



Hit#3 Entry:168057 Library:NIST08.LIB

SI:74 Formula:C<sub>27</sub>H<sub>44</sub>O<sub>2</sub> CAS:0-00-0 MolWeight:400 RetIndex:2580

CompName:1,2-Epoxycholestan-3-one

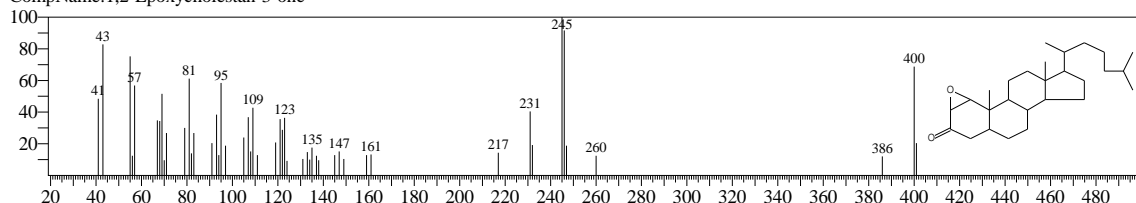

Hit#4 Entry:27275 Library:NIST08.LIB

SI:73 Formula:C<sub>27</sub>H<sub>42</sub>O<sub>2</sub> CAS:984-84-9 MolWeight:398 RetIndex:2751

CompName:Cholest-4-ene-3,6-dione \$\$ .delta.(Sup4)-Cholestene-3,6-dione \$\$ .DELTA.4-Cholestene-3,6-dione \$\$ 4-Cholestene-3,6-dione \$\$

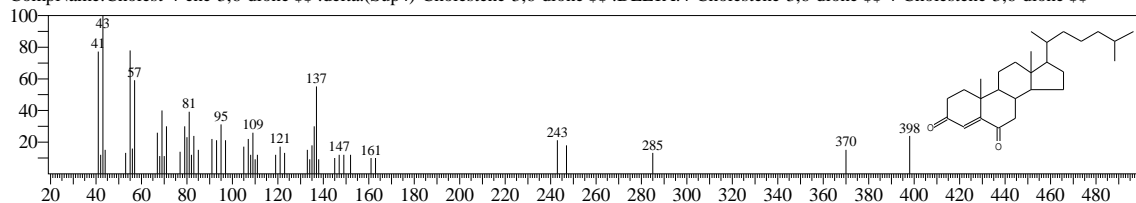

Hit#5 Entry:178120 Library:NIST08.LIB

SI:71 Formula:C<sub>30</sub>H<sub>52</sub>O<sub>2</sub> CAS:0-00-0 MolWeight:444 RetIndex:3350

CompName:Tricyclo[20.8.0.0(7,16)]triacontane, 1(22),7(16)-diepoxy-

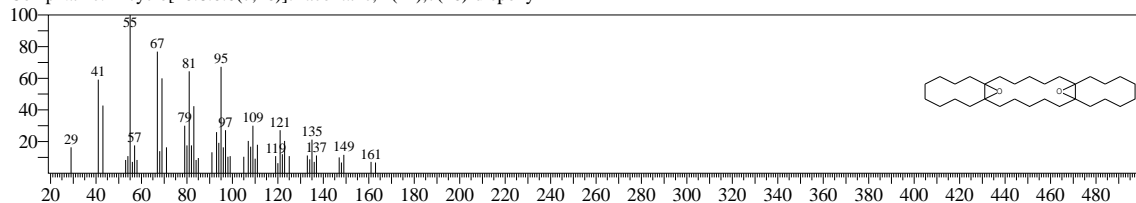

<< Target >>

Line#:44 R.Time:82.385(Scan#:15778) MassPeaks:246

RawMode:Averaged 82.380-82.390(15777-15779) BasePeak:281.00(2019)

BG Mode:Calc. from Peak Group 1 - Event 1

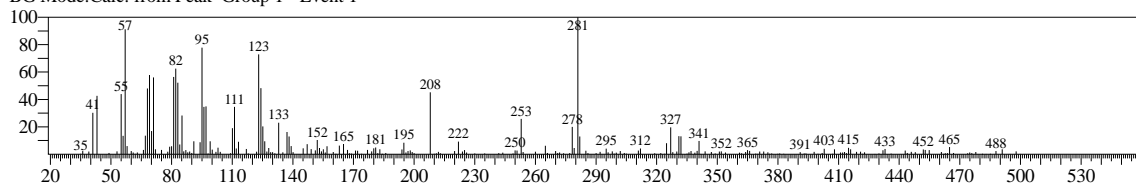

Hit#:1 Entry:22620 Library:NIST08s.LIB

SI:73 Formula:C18H36O CAS:7390-81-0 MolWeight:268 RetIndex:1901

CompName:Oxirane, hexadecyl- \$\$ 1,2-Epoxyoctadecane \$\$ 2-Hexadecyloxirane # \$\$

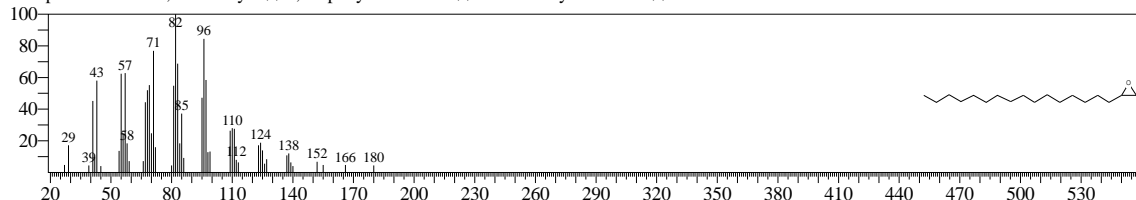

Hit#:2 Entry:109355 Library:NIST08.LIB

SI:73 Formula:C20H40O CAS:102608-53-7 MolWeight:296 RetIndex:2045

CompName:3,7,11,15-Tetramethyl-2-hexadecen-1-ol (2E)-3,7,11,15-Tetramethyl-2-hexadecen-1-ol # \$\$

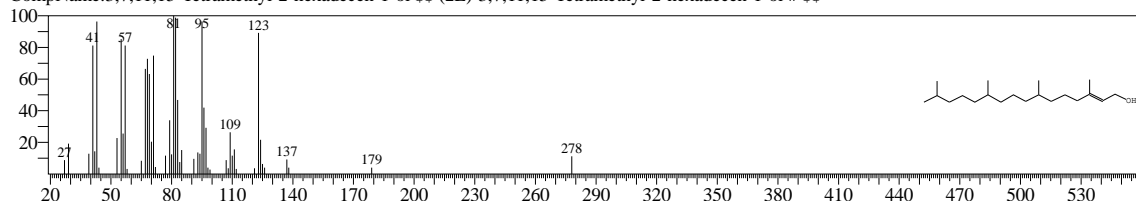

Hit#:3 Entry:908 Library:FFNSC1.3.lib

SI:73 Formula:C20H38 CAS:504-96-1 MolWeight:278 RetIndex:1836

CompName:Neophytadiene

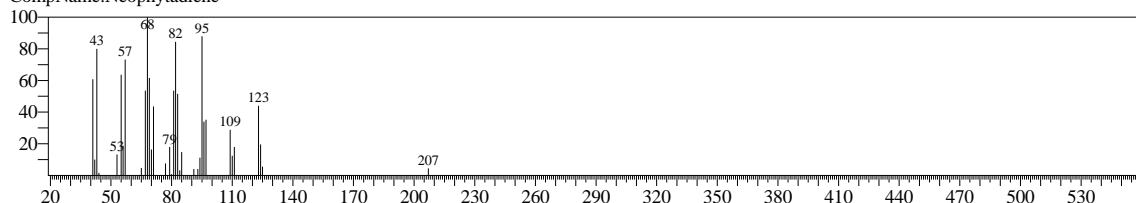

Hit#:4 Entry:26005 Library:NIST08s.LIB

SI:72 Formula:C22H46O2 CAS:22513-81-1 MolWeight:342 RetIndex:2693

CompName:1,22-Docosanediol

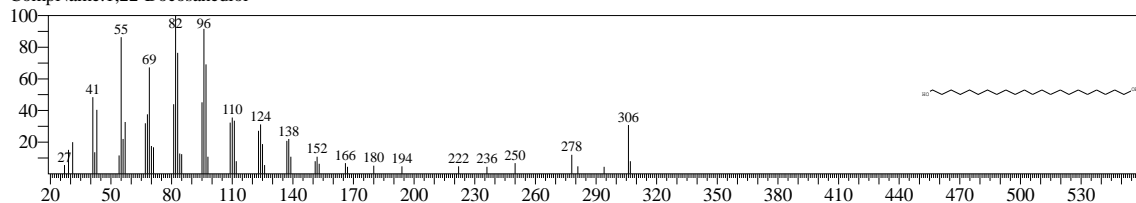

Hit#:5 Entry:188871 Library:NIST08.LIB

SI:72 Formula:C40H82O2 CAS:181719-30-2 MolWeight:594 RetIndex:4483

CompName:Tetracontane-1,40-diol \$\$ 1,40-Tetracontanediol # \$\$

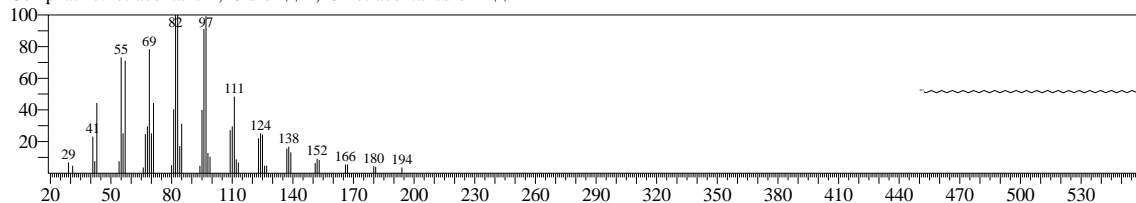

<< Target >>

Line#:45 R.Time:84.955(Scan#:16292) MassPeaks:310

RawMode:Averaged 84.950-84.960(16291-16293) BasePeak:57.05(6468)

BG Mode:Calc. from Peak Group 1 - Event 1

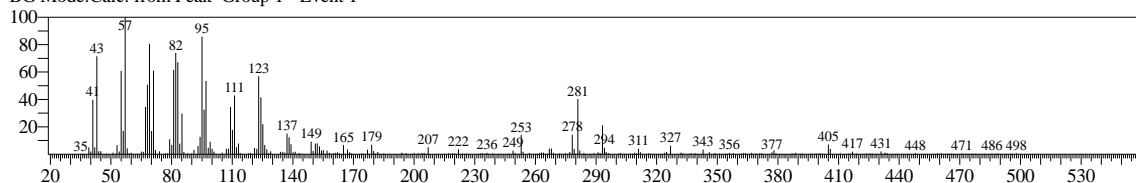

Hit#:1 Entry:908 Library:FFNSC1.3.lib

SI:84 Formula:C20H38 CAS:504-96-1 MolWeight:278 RetIndex:1836

CompName:Neophytadiene

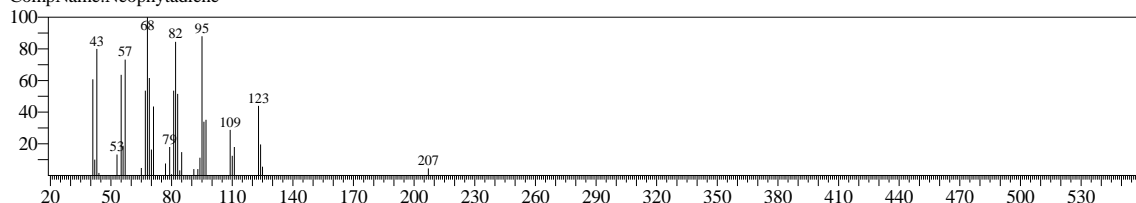

Hit#:2 Entry:109355 Library:NIST08.LIB

SI:83 Formula:C20H40O CAS:102608-53-7 MolWeight:296 RetIndex:2045

CompName:3,7,11,15-Tetramethyl-2-hexadecen-1-ol (2E)-3,7,11,15-Tetramethyl-2-hexadecen-1-ol #

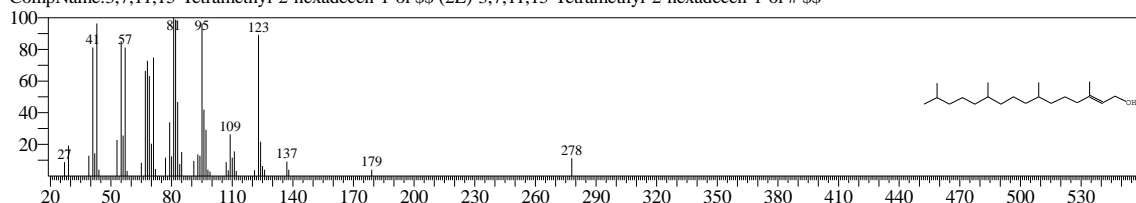

Hit#:3 Entry:188871 Library:NIST08.LIB

SI:83 Formula:C40H82O2 CAS:181719-30-2 MolWeight:594 RetIndex:4483

CompName:Tetracontane-1,40-diol (1,40-Tetracontanediol #

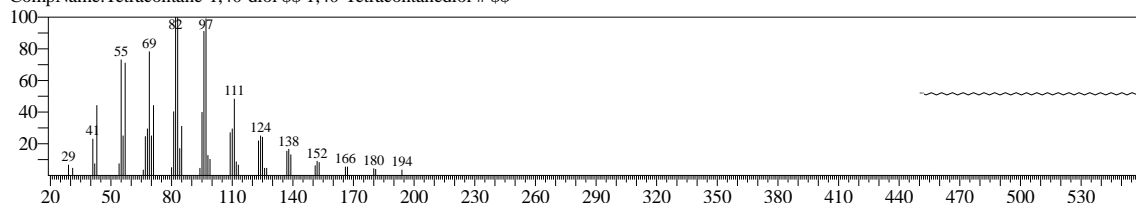

Hit#:4 Entry:186507 Library:NIST08.LIB

SI:82 Formula:C38H74 CAS:0-00-0 MolWeight:530 RetIndex:3779

CompName:1,37-Octatriacontadiene

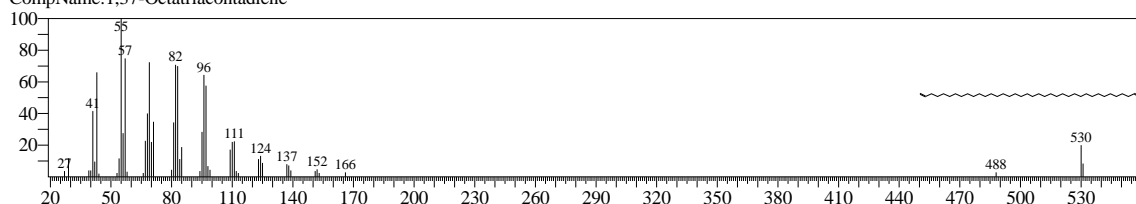

Hit#:5 Entry:109271 Library:NIST08.LIB

SI:82 Formula:C19H36O2 CAS:0-00-0 MolWeight:296 RetIndex:1937

CompName:E-10,13,13-Trimethyl-11-tetradecen-1-ol acetate

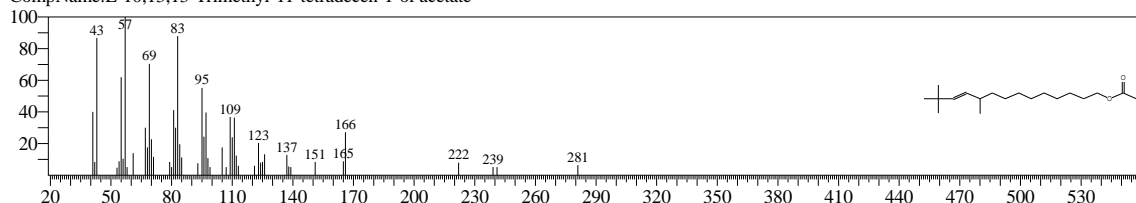

Supplement: f1 [file 7453816.f1.zip › 7453816.f1/M1_LIB_JCHEM_2541773.pdf]
