# Supplementary material for: Evaluation of Two Different Solvents for Azolla pinnata Extracts on Chemical Compositions and Larvicidal Activity against Aedes albopictus (Diptera: Culicidae)
Source: Hindawi journal article supplement (doi:10.1155/2018/7453816), 2018-11-13
Supplement: f1 [file 7453816.f1.zip]

Archive with 2 entries (2 files):
- 7453816.f1/A1_LIB_JCHEM_2541772.pdf
- 7453816.f1/M1_LIB_JCHEM_2541773.pdf
